# Supplementary material for: Epidemiology and Ecology of Influenza A Viruses among Wildlife in the Arctic
Source: Viruses. 2022 Jul 13;14(7):1531. doi: 10.3390/v14071531 (PMC9315492; doi:10.3390/v14071531)
Supplement: Supplementary file 1 [file viruses-14-01531-s001.zip › Article review datasheet Gass 20220612.xlsx]

## Sheet: Final
Search (All include Influenza)	For Use? (0=no/1=yes)	PMID	Title	First Author	Journal/Book	Publication Year	Create Date	PMCID	NIHMS ID	DOI	Citation	Abstract sceen in? (0 no, 1 yes)	Narrative screen in? (0 no, 1 yes)
Norway & Seals	1	8073595	Serological investigation of virus infections in harp seals (Phoca groenlandica) and hooded seals (Cystophora cristata)	Stuen S	Vet Rec	1994	1994/05/07			10.1136/vr.134.19.502	Vet Rec. 1994 May 7;134(19):502-3. doi: 10.1136/vr.134.19.502.	1	1
Alaska & Wildlife	1	11838234	Viral and bacterial serology of free-ranging Pacific walrus	Calle PP	J Wildl Dis	2002	2002/02/13			10.7589/0090-3558-38.1.93	J Wildl Dis. 2002 Jan;38(1):93-100. doi: 10.7589/0090-3558-38.1.93.	1	1
Alaska & Wildlife	1	18269325	Ecology of avian influenza virus in birds	Causey D	J Infect Dis	2008	2008/03/28	PMC7110149		10.1086/524991	J Infect Dis. 2008 Feb 15;197 Suppl 1(Suppl 1):S29-33. doi: 10.1086/524991.	1	1
Canada & Wildlife	1	33635994	A SYSTEMATIC REVIEW AND NARRATIVE SYNTHESIS OF THE USE OF ENVIRONMENTAL SAMPLES FOR THE SURVEILLANCE OF AVIAN INFLUENZA VIRUSES IN WILD WATERBIRDS	Coombe M	J Wildl Dis	2021	2021/02/26			10.7589/JWD-D-20-00082	J Wildl Dis. 2021 Jan 6;57(1):1-18. doi: 10.7589/JWD-D-20-00082.	1	1
Iceland & Wildlife	1	24647410	North Atlantic migratory bird flyways provide routes for intercontinental movement of avian influenza viruses	Dusek RJ	PLoS One	2014	2014/03/21	PMC3960164		10.1371/journal.pone.0092075	PLoS One. 2014 Mar 19;9(3):e92075. doi: 10.1371/journal.pone.0092075. eCollection 2014.	1	1
Subarctic & Wildlife	1	18819672	Climate change and avian influenza	Gilbert M	Rev Sci Tech	2008	2008/09/30	PMC2709837	NIHMS121129		Rev Sci Tech. 2008 Aug;27(2):459-66.	1	1
Arctic & Avian	1	30792982	Comparative Health Assessments of Alaskan Ice Seals	Goertz CEC	Front Vet Sci	2019	2019/02/23	PMC6375287		10.3389/fvets.2019.00004	Front Vet Sci. 2019 Feb 6;6:4. doi: 10.3389/fvets.2019.00004. eCollection 2019.	1	1
Iceland & Wildlife	1	25239729	Avian influenza virus ecology in Iceland shorebirds: intercontinental reassortment and movement	Hall JS	Infect Genet Evol	2014	2014/09/21			10.1016/j.meegid.2014.09.013	Infect Genet Evol. 2014 Dec;28:130-6. doi: 10.1016/j.meegid.2014.09.013. Epub 2014 Sep 18.	1	1
Iceland & Wildlife	1	26677841	Avian Influenza Ecology in North Atlantic Sea Ducks: Not All Ducks Are Created Equal	Hall JS	PLoS One	2015	2015/12/19	PMC4683078		10.1371/journal.pone.0144524	PLoS One. 2015 Dec 17;10(12):e0144524. doi: 10.1371/journal.pone.0144524. eCollection 2015.	1	1
Arctic & Wildlife	1	27309071	First Characterization of Avian Influenza Viruses from Greenland 2014	Hartby CM	Avian Dis	2016	2016/06/17			10.1637/11119-050515-RegR	Avian Dis. 2016 May;60(1 Suppl):302-10. doi: 10.1637/11119-050515-RegR.	1	1
Arctic & Wildlife	1	30289331	SURVEY OF ARCTIC ALASKAN WILDLIFE FOR INFLUENZA A ANTIBODIES: LIMITED EVIDENCE FOR EXPOSURE OF MAMMALS	Hemert CV	J Wildl Dis	2019	2018/10/06			10.7589/2018-05-128	J Wildl Dis. 2019 Apr;55(2):387-398. doi: 10.7589/2018-05-128. Epub 2018 Oct 5.	1	1
Alaska & Wildlife	1	28322698	Reassortment of Influenza A Viruses in Wild Birds in Alaska before H5 Clade 2.3.4.4 Outbreaks	Hill NJ	Emerg Infect Dis	2017	2017/03/22	PMC5367406		10.3201/eid2304.161668	Emerg Infect Dis. 2017 Apr;23(4):654-657. doi: 10.3201/eid2304.161668.	1	1
Alaska & Wildlife	1	18533040	Prevalence of Influenza A viruses in wild migratory birds in Alaska: patterns of variation in detection at a crossroads of intercontinental flyways	Ip HS	Virol J	2008	2008/06/06	PMC2435106		10.1186/1743-422X-5-71	Virol J. 2008 Jun 4;5:71. doi: 10.1186/1743-422X-5-71.	1	1
Alaska & Wildlife	1	7646350	Perpetuation of influenza A viruses in Alaskan waterfowl reservoirs	Ito T	Arch Virol	1995	1995/01/01			10.1007/BF01322743	Arch Virol. 1995;140(7):1163-72. doi: 10.1007/BF01322743.	1	1
Arctic & Avian	1	18198382	Prevalence and diversity of avian influenza viruses in environmental reservoirs	Lang AS	J Gen Virol	2008	2008/01/17			10.1099/vir.0.83369-0	J Gen Virol. 2008 Feb;89(Pt 2):509-519. doi: 10.1099/vir.0.83369-0.	1	1
Circumpolar & Wildlife	1	27309082	Assessing the Role of Seabirds in the Ecology of Influenza A Viruses	Lang AS	Avian Dis	2016	2016/06/17			10.1637/11135-050815-RegR	Avian Dis. 2016 May;60(1 Suppl):378-86. doi: 10.1637/11135-050815-RegR.	1	1
Russia & Wildlife	1	25855748	Intercontinental Spread of Asian-Origin H5N8 to North America through Beringia by Migratory Birds	Lee DH	J Virol	2015	2015/04/10	PMC4474297		10.1128/JVI.00728-15	J Virol. 2015 Jun;89(12):6521-4. doi: 10.1128/JVI.00728-15. Epub 2015 Apr 8.	1	1
Arctic & Wildlife	1	32028933	Evidence of avian influenza virus in seabirds breeding on a Norwegian high-Arctic archipelago	Lee MM	BMC Vet Res	2020	2020/02/08	PMC7006154		10.1186/s12917-020-2265-2	BMC Vet Res. 2020 Feb 7;16(1):48. doi: 10.1186/s12917-020-2265-2.	1	1
Canada & Wildlife	1	34410421	ANTIBODIES AGAINST INFLUENZA VIRUS TYPES A AND B IN CANADIAN SEALS	Measures LN	J Wildl Dis	2021	2021/08/19			10.7589/JWD-D-20-00175	J Wildl Dis. 2021 Aug 19. doi: 10.7589/JWD-D-20-00175. Online ahead of print.	1	1
Alaska & Wildlife	1	29980049	Avian influenza virus ecology and evolution through a climatic lens	Morin CW	Environ Int	2018	2018/07/07			10.1016/j.envint.2018.06.018	Environ Int. 2018 Oct;119:241-249. doi: 10.1016/j.envint.2018.06.018. Epub 2018 Jul 4.	1	1
Arctic & Marine Mammals	1	11763748	Serologic evidence of influenza A infection in marine mammals of arctic Canada	Nielsen O	J Wildl Dis	2001	2002/01/05			10.7589/0090-3558-37.4.820	J Wildl Dis. 2001 Oct;37(4):820-5. doi: 10.7589/0090-3558-37.4.820.	1	1
Arctic & Marine Mammals	1	15557750	Antibodies to human-related H3 influenza A virus in Baikal seals (Phoca sibirica) and ringed seals (Phoca hispida) in Russia	Ohishi K	Microbiol Immunol	2004	2004/11/24			10.1111/j.1348-0421.2004.tb03610.x	Microbiol Immunol. 2004;48(11):905-9. doi: 10.1111/j.1348-0421.2004.tb03610.x.	1	1
Russia & Wildlife	1	16627734	Global patterns of influenza a virus in wild birds	Olsen B	Science	2006	2006/04/22			10.1126/science.1122438	Science. 2006 Apr 21;312(5772):384-8. doi: 10.1126/science.1122438.	1	1
Sweden & Wildlife	1	24599502	Sampling strategies and biodiversity of influenza A subtypes in wild birds	Olson SH	PLoS One	2014	2014/03/07	PMC3944928		10.1371/journal.pone.0090826	PLoS One. 2014 Mar 5;9(3):e90826. doi: 10.1371/journal.pone.0090826. eCollection 2014.	1	1
Alaska & Wildlife	1	21073586	Interspecific exchange of avian influenza virus genes in Alaska: the influence of trans-hemispheric migratory tendency and breeding ground sympatry	Pearce JM	Mol Ecol	2011	2010/11/16	PMC3041836	NIHMS246809	10.1111/j.1365-294X.2010.04908.x	Mol Ecol. 2011 Mar;20(5):1015-25. doi: 10.1111/j.1365-294X.2010.04908.x. Epub 2010 Nov 12.	1	1
Alaska & Wildlife	1	21766196	Evidence for limited exchange of avian influenza viruses between seaducks and dabbling ducks at Alaska Peninsula coastal lagoons	Ramey AM	Arch Virol	2011	2011/07/19			10.1007/s00705-011-1059-z	Arch Virol. 2011 Oct;156(10):1813-21. doi: 10.1007/s00705-011-1059-z. Epub 2011 Jul 16.	1	1
Alaska & Wildlife	1	26944444	Evidence for common ancestry among viruses isolated from wild birds in Beringia and highly pathogenic intercontinental reassortant H5N1 and H5N2 influenza A viruses	Ramey AM	Infect Genet Evol	2016	2016/03/06			10.1016/j.meegid.2016.02.035	Infect Genet Evol. 2016 Jun;40:176-185. doi: 10.1016/j.meegid.2016.02.035. Epub 2016 Mar 2.	1	1
Arctic & Wildlife	1	30557123	EXPOSURE OF ALASKA BROWN BEARS (URSUS ARCTOS) TO BACTERIAL, VIRAL, AND PARASITIC AGENTS VARIES SPATIOTEMPORALLY AND MAY BE INFLUENCED BY AGE	Ramey AM	J Wildl Dis	2019	2018/12/18			10.7589/2018-07-173	J Wildl Dis. 2019 Jul;55(3):576-588. doi: 10.7589/2018-07-173. Epub 2018 Dec 17.	1	1
Russia & Wildlife	1	31077545	Emperor geese (Anser canagicus) are exposed to a diversity of influenza A viruses, are infected during the non-breeding period and contribute to intercontinental viral dispersal	Ramey AM	Transbound Emerg Dis	2019	2019/05/12			10.1111/tbed.13226	Transbound Emerg Dis. 2019 Sep;66(5):1958-1970. doi: 10.1111/tbed.13226. Epub 2019 Jun 6.	1	1
Canada & Wildlife	1	32901574	Influenza A viruses remain infectious for more than seven months in northern wetlands of North America	Ramey AM	Proc Biol Sci	2020	2020/09/09	PMC7542776		10.1098/rspb.2020.1680	Proc Biol Sci. 2020 Sep 9;287(1934):20201680. doi: 10.1098/rspb.2020.1680. Epub 2020 Sep 9.	1	1
Alaska & Wildlife	1	32550610	Ecology of Influenza A Viruses in Wild Birds and Wetlands of Alaska	Ramey AM	Avian Dis	2020	2020/06/19			10.1637/0005-2086-64.2.109	Avian Dis. 2020 Jun;64(2):109-122. doi: 10.1637/0005-2086-64.2.109.	1	1
Alaska & Wildlife	1	34525758	Evidence for interannual persistence of infectious influenza A viruses in Alaska wetlands	Ramey AM	Sci Total Environ	2021	2021/09/16			10.1016/j.scitotenv.2021.150078	Sci Total Environ. 2021 Sep 3;803:150078. doi: 10.1016/j.scitotenv.2021.150078. Online ahead of print.	1	1
Alaska & Wildlife	1	29621333	Influenza A virus recovery, diversity, and intercontinental exchange: A multi-year assessment of wild bird sampling at Izembek National Wildlife Refuge, Alaska	Reeves AB	PLoS One	2018	2018/04/06	PMC5950690		10.1371/journal.pone.0195327	PLoS One. 2018 Apr 5;13(4):e0195327. doi: 10.1371/journal.pone.0195327. eCollection 2018.	1	1
Arctic & Wildlife	1	17541700	Using RRT-PCR analysis and virus isolation to determine the prevalence of avian influenza virus infections in ducks at Minto Flats State Game Refuge, Alaska, during August 2005	Runstadler JA	Arch Virol	2007	2007/06/02	PMC2538573	NIHMS54787	10.1007/s00705-007-0994-1	Arch Virol. 2007;152(10):1901-10. doi: 10.1007/s00705-007-0994-1. Epub 2007 Jun 1.	1	1
Arctic & Wildlife	1	26591451	The dynamics of avian influenza in Lesser Snow Geese: implications for annual and migratory infection patterns	Samuel MD	Ecol Appl	2015	2015/11/24			10.1890/14-1820.1	Ecol Appl. 2015 Oct;25(7):1851-9. doi: 10.1890/14-1820.1.	1	1
Arctic & Wildlife	1	28837606	Maintenance of influenza A viruses and antibody response in mallards (Anas platyrhynchos) sampled during the non-breeding season in Alaska	Spivey TJ	PLoS One	2017	2017/08/25	PMC5570339		10.1371/journal.pone.0183505	PLoS One. 2017 Aug 24;12(8):e0183505. doi: 10.1371/journal.pone.0183505. eCollection 2017.	1	1
Russia & Avian	1	18637721	Gene segment reassortment between American and Asian lineages of avian influenza virus from waterfowl in the Beringia area	Wahlgren J	Vector Borne Zoonotic Dis	2008	2008/07/22			10.1089/vbz.2007.0274	Vector Borne Zoonotic Dis. 2008 Dec;8(6):783-90. doi: 10.1089/vbz.2007.0274.	1	1
Canada & Avian	1	24171570	Evaluation of seabirds in Newfoundland and Labrador, Canada, as hosts of influenza A viruses	Wille M	J Wildl Dis	2014	2013/11/01			10.7589/2012-10-247	J Wildl Dis. 2014 Jan;50(1):98-103. doi: 10.7589/2012-10-247. Epub 2013 Oct 25.	1	1
Arctic & Avian	1	17035314	Evidence of influenza a virus RNA in siberian lake ice	Zhang G	J Virol	2006	2006/10/13	PMC1676296		10.1128/JVI.00986-06	J Virol. 2006 Dec;80(24):12229-35. doi: 10.1128/JVI.00986-06. Epub 2006 Oct 11.	1	1
Russia & Wildlife	1	17283613	Anatidae migration in the western Palearctic and spread of highly pathogenic avian influenza H5NI virus	Gilbert M	Emerg Infect Dis	2006	2007/02/08	PMC3372333		10.3201/eid1211.060223	Emerg Infect Dis. 2006 Nov;12(11):1650-6. doi: 10.3201/eid1211.060223.	1	1
Arctic & Wildlife	1	29944408	Avian Influenza Virus Surveillance in High Arctic Breeding Geese, Greenland	Gaidet N	Avian Dis	2018	2018/06/27			10.1637/11793-010418-ResNote.1	Avian Dis. 2018 Jun;62(2):237-240. doi: 10.1637/11793-010418-ResNote.1.	1	1
Alaska & Wildlife	1	22222690	Genetic structure of Pacific Flyway avian influenza viruses is shaped by geographic location, host species, and sampling period	Girard YA	Virus Genes	2012	2012/01/07			10.1007/s11262-011-0706-5	Virus Genes. 2012 Jun;44(3):415-28. doi: 10.1007/s11262-011-0706-5. Epub 2012 Jan 6.	1	1
Alaska & Wildlife	1	21995264	Cross-seasonal patterns of avian influenza virus in breeding and wintering migratory birds: a flyway perspective	Hill NJ	Vector Borne Zoonotic Dis	2012	2011/10/15	PMC3300065		10.1089/vbz.2010.0246	Vector Borne Zoonotic Dis. 2012 Mar;12(3):243-53. doi: 10.1089/vbz.2010.0246. Epub 2011 Oct 13.	1	1
Canada & Wildlife	1	24889254	Perpetuation and reassortment of gull influenza A viruses in Atlantic North America	Huang Y	Virology	2014	2014/06/04			10.1016/j.virol.2014.04.009	Virology. 2014 May;456-457:353-63. doi: 10.1016/j.virol.2014.04.009. Epub 2014 Apr 28.	1	1
Canada & Wildlife	1	24462905	Diverse inter-continental and host lineage reassortant avian influenza A viruses in pelagic seabirds	Huang Y	Infect Genet Evol	2014	2014/01/28			10.1016/j.meegid.2014.01.014	Infect Genet Evol. 2014 Mar;22:103-11. doi: 10.1016/j.meegid.2014.01.014. Epub 2014 Jan 23.	1	1
Greenland & Wildlife	1	23402125	Surveillance for avian influenza viruses in wild birds in Denmark and Greenland, 2007-10	Hjulsager CK	Avian Dis	2012	2013/02/14			10.1637/10190-041012-ResNote.1	Avian Dis. 2012 Dec;56(4 Suppl):992-8. doi: 10.1637/10190-041012-ResNote.1.	1	1
Alaska & Wildlife	1	28098546	Reoccurrence of Avian Influenza A(H5N2) Virus Clade 2.3.4.4 in Wild Birds, Alaska, USA, 2016	Lee DH	Emerg Infect Dis	2017	2017/01/19	PMC5324823		10.3201/eid2302.161616	Emerg Infect Dis. 2017 Feb;23(2):365-367. doi: 10.3201/eid2302.161616.	1	1
Norway & Avian	1	31660964	No evidence of avian influenza antibodies in two species of raptor nestlings inhabiting Norway	Lee MM	BMC Vet Res	2019	2019/10/30	PMC6816168		10.1186/s12917-019-2133-0	BMC Vet Res. 2019 Oct 28;15(1):375. doi: 10.1186/s12917-019-2133-0.	1	1
Subarctic & Wildlife	1	28092966	Avian influenza prevalence among hunter-harvested birds in a remote Canadian First Nation community	Liberda EN	Rural Remote Health	2017	2017/01/18			10.22605/rrh3864	Rural Remote Health. 2017 Jan-Mar;17(1):3864. doi: 10.22605/rrh3864. Epub 2017 Jan 11.	1	1
Russia & Wildlife	1	30296682	Isolation and characterization of H5Nx highly pathogenic avian influenza viruses of clade 2.3.4.4 in Russia	Marchenko V	Virology	2018	2018/10/09			10.1016/j.virol.2018.09.024	Virology. 2018 Dec;525:216-223. doi: 10.1016/j.virol.2018.09.024. Epub 2018 Oct 5.	1	1
Russia & Wildlife	1	26306756	Influenza A(H5N8) virus isolation in Russia, 2014	Marchenko VY	Arch Virol	2015	2015/08/27			10.1007/s00705-015-2570-4	Arch Virol. 2015 Nov;160(11):2857-60. doi: 10.1007/s00705-015-2570-4. Epub 2015 Aug 26.	1	1
Russia & Wildlife	1	31242207	Phylogeographic evidence for the inter- and intracontinental dissemination of avian influenza viruses via migration flyways	Mine J	PLoS One	2019	2019/06/27	PMC6594620		10.1371/journal.pone.0218506	PLoS One. 2019 Jun 26;14(6):e0218506. doi: 10.1371/journal.pone.0218506. eCollection 2019.	1	1
Russia & Avian	1	10881676	Precursor genes of future pandemic influenza viruses are perpetuated in ducks nesting in Siberia	Okazaki K	Arch Virol	2000	2000/07/06			10.1007/s007050050681	Arch Virol. 2000;145(5):885-93. doi: 10.1007/s007050050681.	1	1
Canada & Wildlife	1	18258085	Wild bird influenza survey, Canada, 2005	Parmley EJ	Emerg Infect Dis	2008	2008/02/09	PMC2600159		10.3201/eid1401.061562	Emerg Infect Dis. 2008 Jan;14(1):84-7. doi: 10.3201/eid1401.061562.	1	1
Arctic & Wildlife	1	17330144	Highly pathogenic H5N1 avian influenza: entry pathways into North America via bird migration	Peterson AT	PLoS One	2007	2007/03/03	PMC1803015		10.1371/journal.pone.0000261	PLoS One. 2007 Feb 28;2(2):e261. doi: 10.1371/journal.pone.0000261.	1	1
Alaska & Wildlife	1	20709346	Transmission and reassortment of avian influenza viruses at the Asian-North American interface	Ramey AM	Virology	2010	2010/08/17			10.1016/j.virol.2010.07.031	Virology. 2010 Oct 25;406(2):352-9. doi: 10.1016/j.virol.2010.07.031. Epub 2010 Aug 14.	1	1
Alaska & Avian	1	20227102	Intercontinental reassortment and genomic variation of low pathogenic avian influenza viruses isolated from northern pintails (Anas acuta) in Alaska: examining the evidence through space and time	Ramey AM	Virology	2010	2010/03/16			10.1016/j.virol.2010.02.006	Virology. 2010 Jun 5;401(2):179-89. doi: 10.1016/j.virol.2010.02.006. Epub 2010 Mar 12.	1	1
Alaska & Wildlife	1	26267465	Sampling of Sea Ducks for Influenza A Viruses in Alaska during Winter Provides Lack of Evidence for Epidemiologic Peak of Infection	Ramey AM	J Wildl Dis	2015	2015/08/13			10.7589/2015-03-057	J Wildl Dis. 2015 Oct;51(4):938-41. doi: 10.7589/2015-03-057. Epub 2015 Aug 12.	1	1
Alaska & Wildlife	1	27036114	Surveillance for Eurasian-origin and intercontinental reassortant highly pathogenic influenza A viruses in Alaska, spring and summer 2015	Ramey AM	Virol J	2016	2016/04/03	PMC4815243		10.1186/s12985-016-0511-9	Virol J. 2016 Mar 31;13:55. doi: 10.1186/s12985-016-0511-9.	1	1
Alaska & Wildlife	1	27587808	H9N2 Influenza A Virus Isolated from a Greater White-Fronted Wild Goose (Anser albifrons) in Alaska Has a Mutation in the PB2 Gene, Which Is Associated with Pathogenicity in Human Pandemic 2009 H1N1	Reeves AB	Genome Announc	2016	2016/09/03	PMC5009965		10.1128/genomeA.00869-16	Genome Announc. 2016 Sep 1;4(5):e00869-16. doi: 10.1128/genomeA.00869-16.	1	1
Alaska & Wildlife	1	32817149	The Genome Sequence of an H6N5 Influenza A Virus Strain Isolated from a Northern Pintail (Anas acuta) Sampled in Alaska, USA, Shares High Identity with That of a South Korean Wild Bird Strain	Reeves AB	Microbiol Resour Announc	2020	2020/08/21	PMC7427187		10.1128/MRA.00639-20	Microbiol Resour Announc. 2020 Aug 13;9(33):e00639-20. doi: 10.1128/MRA.00639-20.	1	1
Norway & Avian	1	21241499	Virological and serological surveillance for type A influenza in the black-legged kittiwake (Rissa tridactyla)	Toennessen R	Virol J	2011	2011/01/19	PMC3032712		10.1186/1743-422X-8-21	Virol J. 2011 Jan 17;8:21. doi: 10.1186/1743-422X-8-21.	1	1
Alaska & Wildlife	1	30896365	Serologic Evidence for Influenza A Virus Exposure in Three Loon Species Breeding in Alaska, USA	Uher-Koch BD	J Wildl Dis	2019	2019/03/22			https://pubmed.ncbi.nlm.nih.gov/30896365/	J Wildl Dis. 2019 Oct;55(4):862-867. Epub 2019 Mar 21.	1	1
Alaska & Wildlife	1	18308356	Examining the hemagglutinin subtype diversity among wild duck-origin influenza A viruses using ethanol-fixed cloacal swabs and a novel RT-PCR method	Wang R	Virology	2008	2008/03/01	PMC2397557	NIHMS50822	10.1016/j.virol.2008.01.041	Virology. 2008 May 25;375(1):182-9. doi: 10.1016/j.virol.2008.01.041. Epub 2008 Mar 4.	1	1
Circumpolar & Wildlife	1	27738169	Role for migratory wild birds in the global spread of avian influenza H5N8	Global Consortium for H5N8 and Related Influenza Viruses	Science	2016	2016/10/15	PMC5972003	EMS77545	10.1126/science.aaf8852	Science. 2016 Oct 14;354(6309):213-217. doi: 10.1126/science.aaf8852.	1	1
Alaska & Wildlife	1	N/A	SEROLOGIC EVIDENCE OF INFLUENZA VIRUS INFECTION IN A RINGED SEAL (PHOCA HISPIDA) FROM ALASKA	Danner	Marine Mammal Science	1998	N/A	N/A		10.1111/j.1748-7692.1998.tb00730.x	10.1111/j.1748-7692.1998.tb00730.x	1	1
Iceland & Avian	1	N/A	Global dissemination of Influenza A virus is driven by wild bird migration through arctic and subarctic zones	Gass	Molecular Ecology	2022	N/A	N/A		https://www.authorea.com/doi/full/10.22541/au.164372348.88612449/v1#	https://www.authorea.com/doi/full/10.22541/au.164372348.88612449/v1#	1	1
Iceland & Avian	1	N/A	Transatlantic spread of highly pathogenic avian influenza H5N1 by wild birds from Europe to North America in 2021	Caliendo, V	Biorxiv	2022	N/A	N/A		https://www.biorxiv.org/content/10.1101/2022.01.13.476155v1.full.pdf	https://www.biorxiv.org/content/10.1101/2022.01.13.476155v1.full.pdf	1	1
Iceland & Avian	1	N/A	The spring migration pattern of arctic birds in southwest Iceland, as recorded by radar	Gudmundsson, Gudmundur A.	Intl J Avian Sci	1993	N/A	N/A		https://doi.org/10.1111/j.1474-919X.1993.tb02828.x	IBIS. 1993. 135(2):166-176. doi: 10.1111/j.1474-919X.1993.tb02828.x	1	1
Arctic & Environment	1	N/A	Evidence and Implications of Recent Climate Change in Northern Alaska and Other Arctic Regions	Hinzman, LD	Climate change	2005	2005-10-01			10.1007/s10584-005-5352-2	Hinzman, L.D., Bettez, N.D., Bolton, W.R. et al. Evidence and Implications of Recent Climate Change in Northern Alaska and Other Arctic Regions. Climatic Change 72, 251–298 (2005).	1	1
Arctic & Environment	1	N/A	AMAP Climate Change Update 2019: An Update to Key Findings of Snow, Water, Ice and Permafrost in the Arctic	Arctic Monitoring and Assessment Programme (AMAP),	Report	2019				AMAP Climate Change Update 2019 | AMAP	AMAP Climate Change Update 2019: An Update to Key Findings of Snow, Water, Ice and Permafrost in the Arctic	1	1

## Sheet: Screened In Based on Title
Search (All include Influenza)	Reports sought for retrieval? (0=no/1=yes)	Abstract sceen in? (0 no, 1 yes)	Narrative screen in? (0 no, 1 yes)	PMID	Title	First Author	Journal/Book	Publication Year	Create Date	PMCID	NIHMS ID	DOI	Citation
Russia & Avian	1	0		16145750	Avian influenza remains a cause for concern	Aris B	Lancet	2005	2005/09/08			10.1016/S0140-6736(05)67198-X	Lancet. 2005 Sep 3-9;366(9488):798. doi: 10.1016/S0140-6736(05)67198-X.
Russia & Wildlife	1	0		29294220	CASCIRE surveillance network and work on avian influenza viruses	Bi Y	Sci China Life Sci	2017	2018/01/03			10.1007/s11427-017-9251-2	Sci China Life Sci. 2017 Dec;60(12):1386-1391. doi: 10.1007/s11427-017-9251-2. Epub 2017 Dec 1.
Russia & Avian	1	0		16785685	Highly pathogenic avian influenza reported to be spreading into western Russia	Coulombier D	Euro Surveill	2005	2006/06/21			10.2807/esw.10.33.02776-en	Euro Surveill. 2005 Aug 18;10(8):E050818.1. doi: 10.2807/esw.10.33.02776-en.
Sweden & Avian	1	0		16794292	H5N1 avian influenza: update on the global situation	De Martin S	Euro Surveill	2005	2006/06/24			10.2807/esw.10.50.02856-en	Euro Surveill. 2005 Dec 15;10(12):E051215.1. doi: 10.2807/esw.10.50.02856-en.
Russia & Avian	1	0		17668629	Diversity of highly pathogenic avian influenza H5N1 viruses that caused epizootic in Western Siberia in 2005	Evseenko VA	Dokl Biol Sci	2007	2007/08/03			10.1134/s0012496607030179	Dokl Biol Sci. 2007 May-Jun;414:226-30. doi: 10.1134/s0012496607030179.
Canada & Bird	1	0		21358923	Influenza viruses in animals	Gyles C	Can Vet J	2010	2011/03/02	PMC2978982			Can Vet J. 2010 Dec;51(12):1315-8.
Sweden & Avian	1	1	0	18598659	Avian influenza virus (H5N1) mortality surveillance	Komar N	Emerg Infect Dis	2008	2008/07/05	PMC2600356		10.3201/eid1407.080161	Emerg Infect Dis. 2008 Jul;14(7):1176-8. doi: 10.3201/eid1407.080161.
Russia & Avian	1	0		16572815	Highly pathogenic influenza virus H5N1 found in western Siberia is genetically related to viruses that circulated in Southeast Asia in 2003-2005	Onishchenko GG	Dokl Biol Sci	2006	2006/04/01			10.1134/s0012496606010170	Dokl Biol Sci. 2006 Jan-Feb;406:63-5. doi: 10.1134/s0012496606010170.
Russia & Wildlife	1	0		20113582	Avian influenza (H5N1) outbreak among wild birds, Russia, 2009	Sharshov K	Emerg Infect Dis	2010	2010/02/02	PMC2958015		10.3201/eid1602.090974	Emerg Infect Dis. 2010 Feb;16(2):349-51. doi: 10.3201/eid1602.090974.
Russia & Avian	1	0		16845780	H5N1 Influenza Virus, Domestic Birds, Western Siberia, Russia	Shestopalov AM	Emerg Infect Dis	2006	2006/07/19	PMC3291046		10.3201/eid1207.051338	Emerg Infect Dis. 2006 Jul;12(7):1167-9. doi: 10.3201/eid1207.051338.
Russia & Avian	1	0		34016764	Emerging H5N8 avian influenza viruses	Shi W	Science	2021	2021/05/21			10.1126/science.abg6302	Science. 2021 May 21;372(6544):784-786. doi: 10.1126/science.abg6302.
Alaska & Ice	1	0		9496967	Flu on ice	Stephenson J	JAMA	1998	1998/03/13				JAMA. 1998 Mar 4;279(9):644.
Norway & Seals	1	1	1	8073595	Serological investigation of virus infections in harp seals (Phoca groenlandica) and hooded seals (Cystophora cristata)	Stuen S	Vet Rec	1994	1994/05/07			10.1136/vr.134.19.502	Vet Rec. 1994 May 7;134(19):502-3. doi: 10.1136/vr.134.19.502.
Norway & Wildlife	1	0		30976905	Experimental infections of Norway rats with avian-derived low-pathogenic influenza A viruses	VanDalen KK	Arch Virol	2019	2019/04/13			10.1007/s00705-019-04225-w	Arch Virol. 2019 Jul;164(7):1831-1836. doi: 10.1007/s00705-019-04225-w. Epub 2019 Apr 11.
Russia & Avian	1	0		16127128	H5N1 avian influenza virus expands its range		Vet Rec	2005	2005/08/30			10.1136/vr.157.9.242	Vet Rec. 2005 Aug 27;157(9):242-3. doi: 10.1136/vr.157.9.242.
Russia & Avian	1	0		16785680	Highly pathogenic avian influenza reported in Russian bird populations	No author	Euro Surveill	2005	2006/06/21				Euro Surveill. 2005 Aug 11;10(8):E050811.2.
Greenland & Avian	1	1	0	16842932	Greenland as a plausible springboard for trans-Atlantic avian influenza spread	Shoham D	Med Hypotheses	2006	2006/07/18			10.1016/j.mehy.2006.05.039	Med Hypotheses. 2006;67(6):1460-1. doi: 10.1016/j.mehy.2006.05.039. Epub 2006 Jul 13.
Canada & Wildlife	1	1	0	17126960	An overview of the epidemiology of avian influenza	Alexander DJ	Vaccine	2007	2006/11/28			10.1016/j.vaccine.2006.10.051	Vaccine. 2007 Jul 26;25(30):5637-44. doi: 10.1016/j.vaccine.2006.10.051. Epub 2006 Nov 9.
Sweden & Avian	1	1	0	26998334	Does influenza A virus infection affect movement behaviour during stopover in its wild reservoir host?	Bengtsson D	R Soc Open Sci	2016	2016/03/22	PMC4785985		10.1098/rsos.150633	R Soc Open Sci. 2016 Feb 10;3(2):150633. doi: 10.1098/rsos.150633. eCollection 2016 Feb.
Russia & Avian	1	1	0	8310117	Unravelling the ecology of influenza A virus	Beveridge WI	Hist Philos Life Sci	1993	1993/01/01				Hist Philos Life Sci. 1993;15(1):23-32.
Russia & Wildlife	1	1	0	27405930	Highly pathogenic avian influenza H5N1 Clade 2.3.2.1c virus in migratory birds, 2014-2015	Bi Y	Virol Sin	2016	2016/07/14	PMC8193437		10.1007/s12250-016-3750-4	Virol Sin. 2016 Aug;31(4):300-5. doi: 10.1007/s12250-016-3750-4. Epub 2016 Jul 7.
Sweden & Wildlife	1	1	0	26819311	Spatiotemporal Analysis of the Genetic Diversity of Seal Influenza A(H10N7) Virus, Northwestern Europe	Bodewes R	J Virol	2016	2016/01/29	PMC4836327		10.1128/JVI.03046-15	J Virol. 2016 Apr 14;90(9):4269-4277. doi: 10.1128/JVI.03046-15. Print 2016 May.
Canada & Wildlife	1	1	0	30552753	Probable reverse zoonosis of influenza A(H1N1)pdm 09 in a striped skunk (Mephitis mephitis)	Britton AP	Zoonoses Public Health	2019	2018/12/16			10.1111/zph.12553	Zoonoses Public Health. 2019 Jun;66(4):422-427. doi: 10.1111/zph.12553. Epub 2018 Dec 14.
Sweden & Wildlife	1	1	0	26441012	Pathogenicity and tissue tropism of currently circulating highly pathogenic avian influenza A virus (H5N1; clade 2.3.2) in tufted ducks (Aythya fuligula)	Bröjer C	Vet Microbiol	2015	2015/10/07			10.1016/j.vetmic.2015.09.011	Vet Microbiol. 2015 Nov 18;180(3-4):273-80. doi: 10.1016/j.vetmic.2015.09.011. Epub 2015 Sep 25.
Alaska & Wildlife	1	1	1	11838234	Viral and bacterial serology of free-ranging Pacific walrus	Calle PP	J Wildl Dis	2002	2002/02/13			10.7589/0090-3558-38.1.93	J Wildl Dis. 2002 Jan;38(1):93-100. doi: 10.7589/0090-3558-38.1.93.
Alaska & Wildlife	1	1	1	18269325	Ecology of avian influenza virus in birds	Causey D	J Infect Dis	2008	2008/03/28	PMC7110149		10.1086/524991	J Infect Dis. 2008 Feb 15;197 Suppl 1(Suppl 1):S29-33. doi: 10.1086/524991.
Canada & Wildlife	1	1	1	33635994	A SYSTEMATIC REVIEW AND NARRATIVE SYNTHESIS OF THE USE OF ENVIRONMENTAL SAMPLES FOR THE SURVEILLANCE OF AVIAN INFLUENZA VIRUSES IN WILD WATERBIRDS	Coombe M	J Wildl Dis	2021	2021/02/26			10.7589/JWD-D-20-00082	J Wildl Dis. 2021 Jan 6;57(1):1-18. doi: 10.7589/JWD-D-20-00082.
Russia & Wildlife	1	1	0	24972026	Virological evaluation of avian influenza virus persistence in natural and anthropic ecosystems of Western Siberia (Novosibirsk Region, summer 2012)	De Marco MA	PLoS One	2014	2014/06/28	PMC4074073		10.1371/journal.pone.0100859	PLoS One. 2014 Jun 27;9(6):e100859. doi: 10.1371/journal.pone.0100859. eCollection 2014.
Arctic & Environment	1	1	0	29626767	Environmental contaminant mixtures modulate in vitro influenza infection	Desforges JP	Sci Total Environ	2018	2018/04/08			10.1016/j.scitotenv.2018.03.321	Sci Total Environ. 2018 Sep 1;634:20-28. doi: 10.1016/j.scitotenv.2018.03.321. Epub 2018 Apr 4.
Alaska & Wildlife	1	1	0	23355978	A robust tool highlights the influence of bird migration on influenza A virus evolution	Dugan VG	Mol Ecol	2012	2013/01/29			10.1111/mec.12101	Mol Ecol. 2012 Dec;21(24):5905-7. doi: 10.1111/mec.12101.
Iceland & Wildlife	1	1	1	24647410	North Atlantic migratory bird flyways provide routes for intercontinental movement of avian influenza viruses	Dusek RJ	PLoS One	2014	2014/03/21	PMC3960164		10.1371/journal.pone.0092075	PLoS One. 2014 Mar 19;9(3):e92075. doi: 10.1371/journal.pone.0092075. eCollection 2014.
Russia & Wildlife	1	1	0	26542001	What adaptive changes in hemagglutinin and neuraminidase are necessary for emergence of pandemic influenza virus from its avian precursor?	Gambaryan AS	Biochemistry (Mosc)	2015	2015/11/07			10.1134/S000629791507007X	Biochemistry (Mosc). 2015 Jul;80(7):872-80. doi: 10.1134/S000629791507007X.
Norway & Wildlife	1	1	0	20426812	Prevalence and subtypes of influenza A viruses in wild waterfowl in Norway 2006-2007	Germundsson A	Acta Vet Scand	2010	2010/04/30	PMC2873271		10.1186/1751-0147-52-28	Acta Vet Scand. 2010 Apr 28;52(1):28. doi: 10.1186/1751-0147-52-28.
Subarctic & Wildlife	1	1	1	N/A	Climate change and avian influenza	Gilbert M	Rev Sci Tech	2008	2008/09/30	PMC2709837	NIHMS121129		Rev Sci Tech. 2008 Aug;27(2):459-66.
Arctic & Avian	1	1	1	30792982	Comparative Health Assessments of Alaskan Ice Seals	Goertz CEC	Front Vet Sci	2019	2019/02/23	PMC6375287		10.3389/fvets.2019.00004	Front Vet Sci. 2019 Feb 6;6:4. doi: 10.3389/fvets.2019.00004. eCollection 2019.
Arctic & Avian	1	1	0	29323841	Influenza A virus in the Western Arctic	Grebennikova TV	Vopr Virusol	2017	2018/01/12				Vopr Virusol. 2017;62(1):11-7.
Canada & Avian	1	1	0	19432000	Survival of avian influenza and Newcastle disease viruses in compost and at ambient temperatures based on virus isolation and real-time reverse transcriptase PCR	Guan J	Avian Dis	2009	2009/05/13			10.1637/8381-062008-Reg.1	Avian Dis. 2009 Mar;53(1):26-33. doi: 10.1637/8381-062008-Reg.1.
Russia & Wildlife	1	1	0	28690288	Genetic characterization of an H2N2 influenza virus isolated from a muskrat in Western Siberia	Gulyaeva M	J Vet Med Sci	2017	2017/07/11	PMC5573837		10.1292/jvms.17-0048	J Vet Med Sci. 2017 Aug 18;79(8):1461-1465. doi: 10.1292/jvms.17-0048. Epub 2017 Jul 10.
Canada & Wildlife	1	1	0	23742717	Evolution of a reassortant North American gull influenza virus lineage: drift, shift and stability	Hall JS	Virol J	2013	2013/06/08	PMC3706275		10.1186/1743-422X-10-179	Virol J. 2013 Jun 6;10:179. doi: 10.1186/1743-422X-10-179.
Iceland & Wildlife	1	1	1	25239729	Avian influenza virus ecology in Iceland shorebirds: intercontinental reassortment and movement	Hall JS	Infect Genet Evol	2014	2014/09/21			10.1016/j.meegid.2014.09.013	Infect Genet Evol. 2014 Dec;28:130-6. doi: 10.1016/j.meegid.2014.09.013. Epub 2014 Sep 18.
Iceland & Wildlife	1	1	1	26677841	Avian Influenza Ecology in North Atlantic Sea Ducks: Not All Ducks Are Created Equal	Hall JS	PLoS One	2015	2015/12/19	PMC4683078		10.1371/journal.pone.0144524	PLoS One. 2015 Dec 17;10(12):e0144524. doi: 10.1371/journal.pone.0144524. eCollection 2015.
Arctic & Wildlife	1	1	1	27309071	First Characterization of Avian Influenza Viruses from Greenland 2014	Hartby CM	Avian Dis	2016	2016/06/17			10.1637/11119-050515-RegR	Avian Dis. 2016 May;60(1 Suppl):302-10. doi: 10.1637/11119-050515-RegR.
Arctic & Wildlife	1	1	1	30289331	SURVEY OF ARCTIC ALASKAN WILDLIFE FOR INFLUENZA A ANTIBODIES: LIMITED EVIDENCE FOR EXPOSURE OF MAMMALS	Hemert CV	J Wildl Dis	2019	2018/10/06			10.7589/2018-05-128	J Wildl Dis. 2019 Apr;55(2):387-398. doi: 10.7589/2018-05-128. Epub 2018 Oct 5.
Alaska & Wildlife	1	1	1	28322698	Reassortment of Influenza A Viruses in Wild Birds in Alaska before H5 Clade 2.3.4.4 Outbreaks	Hill NJ	Emerg Infect Dis	2017	2017/03/22	PMC5367406		10.3201/eid2304.161668	Emerg Infect Dis. 2017 Apr;23(4):654-657. doi: 10.3201/eid2304.161668.
Canada & Wildlife	1	1	0	31750776	TARGETED RESEQUENCING OF WETLAND SEDIMENT AS A TOOL FOR AVIAN INFLUENZA VIRUS SURVEILLANCE	Himsworth CG	J Wildl Dis	2020	2019/11/22				J Wildl Dis. 2020 Apr;56(2):397-408. Epub 2019 Nov 21.
Alaska & Wildlife	1	1	1	18533040	Prevalence of Influenza A viruses in wild migratory birds in Alaska: patterns of variation in detection at a crossroads of intercontinental flyways	Ip HS	Virol J	2008	2008/06/06	PMC2435106		10.1186/1743-422X-5-71	Virol J. 2008 Jun 4;5:71. doi: 10.1186/1743-422X-5-71.
Alaska & Wildlife	1	1	1	7646350	Perpetuation of influenza A viruses in Alaskan waterfowl reservoirs	Ito T	Arch Virol	1995	1995/01/01			10.1007/BF01322743	Arch Virol. 1995;140(7):1163-72. doi: 10.1007/BF01322743.
Arctic & Avian	1	1	1	18198382	Prevalence and diversity of avian influenza viruses in environmental reservoirs	Lang AS	J Gen Virol	2008	2008/01/17			10.1099/vir.0.83369-0	J Gen Virol. 2008 Feb;89(Pt 2):509-519. doi: 10.1099/vir.0.83369-0.
Circumpolar & Wildlife	1	1	1	27309082	Assessing the Role of Seabirds in the Ecology of Influenza A Viruses	Lang AS	Avian Dis	2016	2016/06/17			10.1637/11135-050815-RegR	Avian Dis. 2016 May;60(1 Suppl):378-86. doi: 10.1637/11135-050815-RegR.
Russia & Wildlife	1	1	1	25855748	Intercontinental Spread of Asian-Origin H5N8 to North America through Beringia by Migratory Birds	Lee DH	J Virol	2015	2015/04/10	PMC4474297		10.1128/JVI.00728-15	J Virol. 2015 Jun;89(12):6521-4. doi: 10.1128/JVI.00728-15. Epub 2015 Apr 8.
Arctic & Wildlife	1	1	1	32028933	Evidence of avian influenza virus in seabirds breeding on a Norwegian high-Arctic archipelago	Lee MM	BMC Vet Res	2020	2020/02/08	PMC7006154		10.1186/s12917-020-2265-2	BMC Vet Res. 2020 Feb 7;16(1):48. doi: 10.1186/s12917-020-2265-2.
Norway & Avian	1	1	0	34118927	First detection of highly pathogenic avian influenza virus in Norway	Madslien K	BMC Vet Res	2021	2021/06/13	PMC8199823		10.1186/s12917-021-02928-4	BMC Vet Res. 2021 Jun 12;17(1):218. doi: 10.1186/s12917-021-02928-4.
Canada & Wildlife	1	1	1	34410421	ANTIBODIES AGAINST INFLUENZA VIRUS TYPES A AND B IN CANADIAN SEALS	Measures LN	J Wildl Dis	2021	2021/08/19			10.7589/JWD-D-20-00175	J Wildl Dis. 2021 Aug 19. doi: 10.7589/JWD-D-20-00175. Online ahead of print.
Alaska & Wildlife	1	1	1	29980049	Avian influenza virus ecology and evolution through a climatic lens	Morin CW	Environ Int	2018	2018/07/07			10.1016/j.envint.2018.06.018	Environ Int. 2018 Oct;119:241-249. doi: 10.1016/j.envint.2018.06.018. Epub 2018 Jul 4.
Arctic & Marine Mammals	1	1	1	11763748	Serologic evidence of influenza A infection in marine mammals of arctic Canada	Nielsen O	J Wildl Dis	2001	2002/01/05			10.7589/0090-3558-37.4.820	J Wildl Dis. 2001 Oct;37(4):820-5. doi: 10.7589/0090-3558-37.4.820.
Arctic & Marine Mammals	1	1	1	15557750	Antibodies to human-related H3 influenza A virus in Baikal seals (Phoca sibirica) and ringed seals (Phoca hispida) in Russia	Ohishi K	Microbiol Immunol	2004	2004/11/24			10.1111/j.1348-0421.2004.tb03610.x	Microbiol Immunol. 2004;48(11):905-9. doi: 10.1111/j.1348-0421.2004.tb03610.x.
Russia & Wildlife	1	1	1	16627734	Global patterns of influenza a virus in wild birds	Olsen B	Science	2006	2006/04/22			10.1126/science.1122438	Science. 2006 Apr 21;312(5772):384-8. doi: 10.1126/science.1122438.
Sweden & Wildlife	1	1	1	24599502	Sampling strategies and biodiversity of influenza A subtypes in wild birds	Olson SH	PLoS One	2014	2014/03/07	PMC3944928		10.1371/journal.pone.0090826	PLoS One. 2014 Mar 5;9(3):e90826. doi: 10.1371/journal.pone.0090826. eCollection 2014.
Alaska & Wildlife	1	1	1	21073586	Interspecific exchange of avian influenza virus genes in Alaska: the influence of trans-hemispheric migratory tendency and breeding ground sympatry	Pearce JM	Mol Ecol	2011	2010/11/16	PMC3041836	NIHMS246809	10.1111/j.1365-294X.2010.04908.x	Mol Ecol. 2011 Mar;20(5):1015-25. doi: 10.1111/j.1365-294X.2010.04908.x. Epub 2010 Nov 12.
Sweden & Avian	1	1	0	22748173	Global animal disease surveillance	Perez A	Spat Spatiotemporal Epidemiol	2011	2012/07/04	PMC7185519		10.1016/j.sste.2011.07.006	Spat Spatiotemporal Epidemiol. 2011 Sep;2(3):135-45. doi: 10.1016/j.sste.2011.07.006. Epub 2011 Jul 19.
Canada & Wildlife	1	1	0	27485496	Prevalence of influenza A virus in live-captured North Atlantic gray seals: a possible wild reservoir	Puryear WB	Emerg Microbes Infect	2016	2016/08/04	PMC5034098		10.1038/emi.2016.77	Emerg Microbes Infect. 2016 Aug 3;5(8):e81. doi: 10.1038/emi.2016.77.
Alaska & Wildlife	1	1	1	21766196	Evidence for limited exchange of avian influenza viruses between seaducks and dabbling ducks at Alaska Peninsula coastal lagoons	Ramey AM	Arch Virol	2011	2011/07/19			10.1007/s00705-011-1059-z	Arch Virol. 2011 Oct;156(10):1813-21. doi: 10.1007/s00705-011-1059-z. Epub 2011 Jul 16.
Canada & Avian	1	1	0	24949926	Evidence for seasonal patterns in the relative abundance of avian influenza virus subtypes in blue-winged teal (Anas discors)	Ramey AM	J Wildl Dis	2014	2014/06/21			10.7589/2013-09-232	J Wildl Dis. 2014 Oct;50(4):916-22. doi: 10.7589/2013-09-232. Epub 2014 Jun 20.
Alaska & Wildlife	1	1	1	26944444	Evidence for common ancestry among viruses isolated from wild birds in Beringia and highly pathogenic intercontinental reassortant H5N1 and H5N2 influenza A viruses	Ramey AM	Infect Genet Evol	2016	2016/03/06			10.1016/j.meegid.2016.02.035	Infect Genet Evol. 2016 Jun;40:176-185. doi: 10.1016/j.meegid.2016.02.035. Epub 2016 Mar 2.
Arctic & Wildlife	1	1	1	30557123	EXPOSURE OF ALASKA BROWN BEARS (URSUS ARCTOS) TO BACTERIAL, VIRAL, AND PARASITIC AGENTS VARIES SPATIOTEMPORALLY AND MAY BE INFLUENCED BY AGE	Ramey AM	J Wildl Dis	2019	2018/12/18			10.7589/2018-07-173	J Wildl Dis. 2019 Jul;55(3):576-588. doi: 10.7589/2018-07-173. Epub 2018 Dec 17.
Russia & Wildlife	1	1	1	31077545	Emperor geese (Anser canagicus) are exposed to a diversity of influenza A viruses, are infected during the non-breeding period and contribute to intercontinental viral dispersal	Ramey AM	Transbound Emerg Dis	2019	2019/05/12			10.1111/tbed.13226	Transbound Emerg Dis. 2019 Sep;66(5):1958-1970. doi: 10.1111/tbed.13226. Epub 2019 Jun 6.
Canada & Wildlife	1	1	1	32901574	Influenza A viruses remain infectious for more than seven months in northern wetlands of North America	Ramey AM	Proc Biol Sci	2020	2020/09/09	PMC7542776		10.1098/rspb.2020.1680	Proc Biol Sci. 2020 Sep 9;287(1934):20201680. doi: 10.1098/rspb.2020.1680. Epub 2020 Sep 9.
Alaska & Wildlife	1	1	1	32550610	Ecology of Influenza A Viruses in Wild Birds and Wetlands of Alaska	Ramey AM	Avian Dis	2020	2020/06/19			10.1637/0005-2086-64.2.109	Avian Dis. 2020 Jun;64(2):109-122. doi: 10.1637/0005-2086-64.2.109.
Alaska & Wildlife	1	1	1	34525758	Evidence for interannual persistence of infectious influenza A viruses in Alaska wetlands	Ramey AM	Sci Total Environ	2021	2021/09/16			10.1016/j.scitotenv.2021.150078	Sci Total Environ. 2021 Sep 3;803:150078. doi: 10.1016/j.scitotenv.2021.150078. Online ahead of print.
Alaska & Wildlife	1	1	1	29621333	Influenza A virus recovery, diversity, and intercontinental exchange: A multi-year assessment of wild bird sampling at Izembek National Wildlife Refuge, Alaska	Reeves AB	PLoS One	2018	2018/04/06	PMC5950690		10.1371/journal.pone.0195327	PLoS One. 2018 Apr 5;13(4):e0195327. doi: 10.1371/journal.pone.0195327. eCollection 2018.
Arctic & Wildlife	1	1	1	17541700	Using RRT-PCR analysis and virus isolation to determine the prevalence of avian influenza virus infections in ducks at Minto Flats State Game Refuge, Alaska, during August 2005	Runstadler JA	Arch Virol	2007	2007/06/02	PMC2538573	NIHMS54787	10.1007/s00705-007-0994-1	Arch Virol. 2007;152(10):1901-10. doi: 10.1007/s00705-007-0994-1. Epub 2007 Jun 1.
Arctic & Wildlife	1	1	1	26591451	The dynamics of avian influenza in Lesser Snow Geese: implications for annual and migratory infection patterns	Samuel MD	Ecol Appl	2015	2015/11/24			10.1890/14-1820.1	Ecol Appl. 2015 Oct;25(7):1851-9. doi: 10.1890/14-1820.1.
Siberia & Avian	1	1	0	23091712	Persistence of avian influenza viruses in various artificially frozen environmental water types	Shoham D	Influenza Res Treat	2012	2012/10/24	PMC3471417		10.1155/2012/912326	Influenza Res Treat. 2012;2012:912326. doi: 10.1155/2012/912326. Epub 2012 Oct 4.
Arctic & Wildlife	1	1	0	32070804	A review of pathogens in selected Baltic Sea indicator species	Sonne C	Environ Int	2020	2020/02/20			10.1016/j.envint.2020.105565	Environ Int. 2020 Apr;137:105565. doi: 10.1016/j.envint.2020.105565. Epub 2020 Feb 18.
Arctic & Wildlife	1	1	1	28837606	Maintenance of influenza A viruses and antibody response in mallards (Anas platyrhynchos) sampled during the non-breeding season in Alaska	Spivey TJ	PLoS One	2017	2017/08/25	PMC5570339		10.1371/journal.pone.0183505	PLoS One. 2017 Aug 24;12(8):e0183505. doi: 10.1371/journal.pone.0183505. eCollection 2017.
Canada & Avian	1	1	0	32548133	Extraction and Detection of Avian Influenza Virus From Wetland Sediment Using Enrichment-Based Targeted Resequencing	Tindale LC	Front Vet Sci	2020	2020/06/18	PMC7273442		10.3389/fvets.2020.00301	Front Vet Sci. 2020 May 29;7:301. doi: 10.3389/fvets.2020.00301. eCollection 2020.
Russia & Wildlife	1	1	0	26341298	Bayesian Inference Reveals Host-Specific Contributions to the Epidemic Expansion of Influenza A H5N1	Trovão NS	Mol Biol Evol	2015	2015/09/06	PMC4831561		10.1093/molbev/msv185	Mol Biol Evol. 2015 Dec;32(12):3264-75. doi: 10.1093/molbev/msv185. Epub 2015 Sep 3.
Russia & Avian	1	1	1	18637721	Gene segment reassortment between American and Asian lineages of avian influenza virus from waterfowl in the Beringia area	Wahlgren J	Vector Borne Zoonotic Dis	2008	2008/07/22			10.1089/vbz.2007.0274	Vector Borne Zoonotic Dis. 2008 Dec;8(6):783-90. doi: 10.1089/vbz.2007.0274.
Sweden & Wildlife	1	1	0	17552093	Surveillance of influenza A virus in migratory waterfowl in northern Europe	Wallensten A	Emerg Infect Dis	2007	2007/06/08	PMC2725893		10.3201/eid1303.061130	Emerg Infect Dis. 2007 Mar;13(3):404-11. doi: 10.3201/eid1303.061130.
Canada & Avian	1	1	1	24171570	Evaluation of seabirds in Newfoundland and Labrador, Canada, as hosts of influenza A viruses	Wille M	J Wildl Dis	2014	2013/11/01			10.7589/2012-10-247	J Wildl Dis. 2014 Jan;50(1):98-103. doi: 10.7589/2012-10-247. Epub 2013 Oct 25.
Sweden & Wildlife	1	1	0	30373662	Alternate routes of influenza A virus infection in Mallard (Anas platyrhynchos)	Wille M	Vet Res	2018	2018/10/31	PMC6206871		10.1186/s13567-018-0604-0	Vet Res. 2018 Oct 29;49(1):110. doi: 10.1186/s13567-018-0604-0.
Arctic & Wildlife	1	1	0	23472177	High seroprevalence of antibodies to avian influenza viruses among wild waterfowl in Alaska: implications for surveillance	Wilson HM	PLoS One	2013	2013/03/09	PMC3589273		10.1371/journal.pone.0058308	PLoS One. 2013;8(3):e58308. doi: 10.1371/journal.pone.0058308. Epub 2013 Mar 5.
Arctic & Avian	1	1	1	17035314	Evidence of influenza a virus RNA in siberian lake ice	Zhang G	J Virol	2006	2006/10/13	PMC1676296		10.1128/JVI.00986-06	J Virol. 2006 Dec;80(24):12229-35. doi: 10.1128/JVI.00986-06. Epub 2006 Oct 11.
Canada & Avian	1	1	0	31406229	Semiaquatic mammals might be intermediate hosts to spread avian influenza viruses from avian to human	Zhao P	Sci Rep	2019	2019/08/14	PMC6690891		10.1038/s41598-019-48255-5	Sci Rep. 2019 Aug 12;9(1):11641. doi: 10.1038/s41598-019-48255-5.
Sweden & Avian	1	1	0	25425511	Avian influenza A(H10N7) virus involvement in mass mortality of harbour seals (Phoca vitulina) in Sweden, March through October 2014	Zohari S	Euro Surveill	2014	2014/11/27			10.2807/1560-7917.es2014.19.46.20967	Euro Surveill. 2014 Nov 20;19(46):20967. doi: 10.2807/1560-7917.es2014.19.46.20967.
Canada & Wildlife	1	0		20521692	Studying possible cross-protection of Canada geese preexposed to North American low pathogenicity avian influenza virus strains (H3N8, H4N6, and H5N2) against an H5N1 highly pathogenic avian influenza challenge	Berhane Y	Avian Dis	2010	2010/06/05			10.1637/8841-040309-Reg.1	Avian Dis. 2010 Mar;54(1 Suppl):548-54. doi: 10.1637/8841-040309-Reg.1.
Russia & Wildlife	1	1	1	17283613	Anatidae migration in the western Palearctic and spread of highly pathogenic avian influenza H5NI virus	Gilbert M	Emerg Infect Dis	2006	2007/02/08	PMC3372333		10.3201/eid1211.060223	Emerg Infect Dis. 2006 Nov;12(11):1650-6. doi: 10.3201/eid1211.060223.
Iceland & Wildlife	1	0		30996092	Aerosol Transmission of Gull-Origin Iceland Subtype H10N7 Influenza A Virus in Ferrets	Guan M	J Virol	2019	2019/04/19	PMC6580963		10.1128/JVI.00282-19	J Virol. 2019 Jun 14;93(13):e00282-19. doi: 10.1128/JVI.00282-19. Print 2019 Jul 1.
Alaska & Wildlife	1	0		21668687	Experimental challenge and pathology of highly pathogenic avian influenza virus H5N1 in dunlin (Calidris alpina), an intercontinental migrant shorebird species	Hall JS	Influenza Other Respir Viruses	2011	2011/06/15	PMC4942049		10.1111/j.1750-2659.2011.00238.x	Influenza Other Respir Viruses. 2011 Sep;5(5):365-72. doi: 10.1111/j.1750-2659.2011.00238.x. Epub 2011 Mar 15.
Canada & Wildlife	1	0		17997603	Influenza in migratory birds and evidence of limited intercontinental virus exchange	Krauss S	PLoS Pathog	2007	2007/11/14	PMC2065878		10.1371/journal.ppat.0030167	PLoS Pathog. 2007 Nov;3(11):e167. doi: 10.1371/journal.ppat.0030167.
Alaska & Avian	1	1	0	23778609	Genomic analysis of avian influenza viruses from waterfowl in western Alaska, USA	Reeves AB	J Wildl Dis	2013	2013/06/20			10.7589/2012-04-108	J Wildl Dis. 2013 Jul;49(3):600-10. doi: 10.7589/2012-04-108.
Finland & Avian	1	0		23412765	Detection method for avian influenza viruses in water	Rönnqvist M	Food Environ Virol	2012	2013/02/16			10.1007/s12560-011-9075-4	Food Environ Virol. 2012 Mar;4(1):26-33. doi: 10.1007/s12560-011-9075-4. Epub 2011 Dec 22.
Russia & Avian	1	0		22494627	Infection of chickens caused by avian influenza virus A/H5N1 delivered by aerosol and other routes	Sergeev AA	Transbound Emerg Dis	2013	2012/04/13			10.1111/j.1865-1682.2012.01329.x	Transbound Emerg Dis. 2013 Apr;60(2):159-65. doi: 10.1111/j.1865-1682.2012.01329.x. Epub 2012 Apr 11.
Russia & Wildlife	1	0		18041224	[Complex environmental and virological monitoring in the Primorye Territory in 2003-2006]	Shchelkanov MIu	Vopr Virusol	2007	2007/11/29				Vopr Virusol. 2007 Sep-Oct;52(5):37-48.
Russia & Avian	1	1	0	28542340	No evidence that migratory geese disperse avian influenza viruses from breeding to wintering ground	Yin S	PLoS One	2017	2017/05/26	PMC5436700		10.1371/journal.pone.0177790	PLoS One. 2017 May 18;12(5):e0177790. doi: 10.1371/journal.pone.0177790. eCollection 2017.
Russia & Wildlife	1	0		17494548	Summary of avian influenza activity in Europe, Asia, Africa, and Australasia, 2002-2006	Alexander DJ	Avian Dis	2007	2007/05/15			10.1637/7602-041306R.1	Avian Dis. 2007 Mar;51(1 Suppl):161-6. doi: 10.1637/7602-041306R.1.
Russia & Wildlife	1	0		16328178	[How dangerous is avian flu for mankind?]	Allwinn R	Med Klin (Munich)	2005	2005/12/06			10.1007/s00063-005-1099-9	Med Klin (Munich). 2005 Nov 15;100(11):710-3. doi: 10.1007/s00063-005-1099-9.
Alaska & Avian	1	0		27691941	INFECTIOUS DISEASE AND TOXICOLOGICAL MONITORING OF STRANDED PACIFIC HARBOR SEALS (PHOCA VITULINA RICHARDSI) IN COOK INLET AS SURROGATES FOR MONITORING ENDANGERED BELUGAS (DELPHINAPTERUS LEUCAS)	Bauer KL	J Zoo Wildl Med	2016	2016/10/04			10.1638/2015-0147.1	J Zoo Wildl Med. 2016 Sep;47(3):770-780. doi: 10.1638/2015-0147.1.
Sweden & Wildlife	1	0		19737752	Pathology of natural highly pathogenic avian influenza H5N1 infection in wild tufted ducks (Aythya fuligula)	Bröjer C	J Vet Diagn Invest	2009	2009/09/10			10.1177/104063870902100501	J Vet Diagn Invest. 2009 Sep;21(5):579-87. doi: 10.1177/104063870902100501.
Arctic & Warming	1	0		27473191	Surveillance of infectious diseases in the Arctic	Bruce M	Public Health	2016	2016/07/31			10.1016/j.puhe.2016.06.014	Public Health. 2016 Aug;137:5-12. doi: 10.1016/j.puhe.2016.06.014. Epub 2016 Jul 26.
Alaska & Wildlife	1	0		18828565	Viral and bacterial serology of six free-ranging bearded seals Erignathus barbatus	Calle PP	Dis Aquat Organ	2008	2008/10/03			10.3354/dao01927	Dis Aquat Organ. 2008 Aug 19;81(1):77-80. doi: 10.3354/dao01927.
Russia & Wildlife	1	0		24652313	Risks of avian influenza transmission in areas of intensive free-ranging duck production with wild waterfowl	Cappelle J	Ecohealth	2014	2014/03/22	PMC4047217	NIHMS578079	10.1007/s10393-014-0914-2	Ecohealth. 2014;11(1):109-19. doi: 10.1007/s10393-014-0914-2. Epub 2014 Mar 21.
Canada & Wildlife	1	0		19459279	Avian influenza infections in birds--a moving target	Capua I	Influenza Other Respir Viruses	2007	2009/05/23	PMC4634665		10.1111/j.1750-2659.2006.00004.x	Influenza Other Respir Viruses. 2007 Jan;1(1):11-8. doi: 10.1111/j.1750-2659.2006.00004.x.
Canada & Wildlife	1	0		19276432	Avian influenza infection in birds: a challenge and opportunity for the poultry veterinarian	Capua I	Poult Sci	2009	2009/03/12			10.3382/ps.2008-00289	Poult Sci. 2009 Apr;88(4):842-6. doi: 10.3382/ps.2008-00289.
Polar & Avian	1	0		32214634	Molecular surveillance for avian influenza A virus in king penguins (Aptenodytes patagonicus)	Chang CM	Polar Biol	2009	2020/03/28	PMC7087602		10.1007/s00300-009-0587-4	Polar Biol. 2009;32(4):663. doi: 10.1007/s00300-009-0587-4. Epub 2009 Feb 6.
Russia & Avian	1	0		28930520	Molecular evolution of hemagglutinin gene of Influenza A virus	De A	Front Biosci (Schol Ed)	2018	2017/09/21			10.2741/s502	Front Biosci (Schol Ed). 2018 Jan 1;10:101-118. doi: 10.2741/s502.
Canada & Bird	1	0		29922681	Geographical and Historical Patterns in the Emergences of Novel Highly Pathogenic Avian Influenza (HPAI) H5 and H7 Viruses in Poultry	Dhingra MS	Front Vet Sci	2018	2018/06/21	PMC5996087		10.3389/fvets.2018.00084	Front Vet Sci. 2018 Jun 5;5:84. doi: 10.3389/fvets.2018.00084. eCollection 2018.
Arctic & Wildlife	1	0		20621205	Mx gene diversity and influenza association among five wild dabbling duck species (Anas spp.) in Alaska	Dillon D	Infect Genet Evol	2010	2010/07/13	PMC2962922	NIHMS235261	10.1016/j.meegid.2010.07.004	Infect Genet Evol. 2010 Oct;10(7):1085-93. doi: 10.1016/j.meegid.2010.07.004. Epub 2010 Jul 16.
Russia & Wildlife	1	0		16981508	[Some aspects of avian flu in the Tyumen region]	Dubinina OA	Zh Mikrobiol Epidemiol Immunobiol	2006	2006/09/20				Zh Mikrobiol Epidemiol Immunobiol. 2006 Jul-Aug;(5):106-7.
Russia & Wildlife	1	0		28609260	Genesis of Influenza A(H5N8) Viruses	El-Shesheny R	Emerg Infect Dis	2017	2017/06/14	PMC5547793		10.3201/eid2308.170143	Emerg Infect Dis. 2017 Aug;23(8):1368-1371. doi: 10.3201/eid2308.170143. Epub 2017 Aug 15.
Finland & Avian	1	1	0	7232144	Occurrence of influenza A viruses and their antibodies in migratory birds in Finland	Estola T	Nord Vet Med	1980	1980/07/01				Nord Vet Med. 1980 Jul-Aug;32(7-8):321-4.
Russia & Avian	1	0		32626052	Avian influenza overview May - August 2018	European Food Safety Authority	EFSA J	2018	2020/07/07	PMC7009402		10.2903/j.efsa.2018.5430	EFSA J. 2018 Sep 27;16(9):e05430. doi: 10.2903/j.efsa.2018.5430. eCollection 2018 Sep.
Russia & Avian	1	0		32625795	Avian influenza overview August - November 2018	European Food Safety Authority	EFSA J	2018	2020/07/07	PMC7009621		10.2903/j.efsa.2018.5573	EFSA J. 2018 Dec 20;16(12):e05573. doi: 10.2903/j.efsa.2018.5573. eCollection 2018 Dec.
Russia & Avian	1	0		32626274	Avian influenza overview November 2018 - February 2019	European Food Safety Authority	EFSA J	2019	2020/07/07	PMC7009136		10.2903/j.efsa.2019.5664	EFSA J. 2019 Mar 28;17(3):e05664. doi: 10.2903/j.efsa.2019.5664. eCollection 2019 Mar.
Russia & Avian	1	0		33281980	Avian influenza overview May - August 2020	European Food Safety Authority	EFSA J	2020	2020/12/07	PMC7525800		10.2903/j.efsa.2020.6270	EFSA J. 2020 Sep 30;18(9):e06270. doi: 10.2903/j.efsa.2020.6270. eCollection 2020 Sep.
Russia & Avian	1	0		33717356	Avian influenza overview December 2020 - February 2021	European Food Safety Authority	EFSA J	2021	2021/03/15	PMC7927793		10.2903/j.efsa.2021.6497	EFSA J. 2021 Mar 3;19(3):e06497. doi: 10.2903/j.efsa.2021.6497. eCollection 2021 Mar.
Norway & Avian	1	0		33343737	Annual Report on surveillance for Avian Influenza in poultry and wild birds in Member States of the European Union in 2019	European Food Safety Authority (EFSA)	EFSA J	2020	2020/12/21	PMC7737617		10.2903/j.efsa.2020.6349	EFSA J. 2020 Dec 15;18(12):e06349. doi: 10.2903/j.efsa.2020.6349. eCollection 2020 Dec.
Russia & Avian	1	0		18839532	[Study on characterization of the hemagglutinin gene of avian influenza virus H5N1 subtype originated from the pan Pacific regions]	Fang S	Wei Sheng Yan Jiu	2008	2008/10/09				Wei Sheng Yan Jiu. 2008 Jul;37(4):457-60.
Russia & Wildlife	1	0		17112378	Asymptomatic infection with highly pathogenic avian influenza H5N1 in wild birds: how sound is the evidence?	Feare CJ	Virol J	2006	2006/11/23	PMC1661592		10.1186/1743-422X-3-96	Virol J. 2006 Nov 17;3:96. doi: 10.1186/1743-422X-3-96.
Russia & Wildlife	1	0		16408629	[Sensitivity of influenza A/H5 viruses isolated from wild birds on the territory of Russia to arbidol in the cultured MDCK cells]	Fediakina IT	Vopr Virusol	2005	2006/01/18				Vopr Virusol. 2005 Nov-Dec;50(6):32-5.
Russia & Wildlife	1	0		16981496	[Epizootic and epidemiological situation with the avian flu in Dovolensk and Kupinsk areas of Novosibirsk region and the preventive measures]	Fedianin AP	Zh Mikrobiol Epidemiol Immunobiol	2006	2006/09/20				Zh Mikrobiol Epidemiol Immunobiol. 2006 Jul-Aug;(5):66-8.
Sweden & Wildlife	1	1	0	15709000	Characterization of a novel influenza A virus hemagglutinin subtype (H16) obtained from black-headed gulls	Fouchier RA	J Virol	2005	2005/02/15	PMC548452		10.1128/JVI.79.5.2814-2822.2005	J Virol. 2005 Mar;79(5):2814-22. doi: 10.1128/JVI.79.5.2814-2822.2005.
Canada & Wildlife	1	1	0	28545432	The impact of migratory flyways on the spread of avian influenza virus in North America	Fourment M	BMC Evol Biol	2017	2017/05/27	PMC5445350		10.1186/s12862-017-0965-4	BMC Evol Biol. 2017 May 25;17(1):118. doi: 10.1186/s12862-017-0965-4.
Arctic & Wildlife	1	1	1	29944408	Avian Influenza Virus Surveillance in High Arctic Breeding Geese, Greenland	Gaidet N	Avian Dis	2018	2018/06/27			10.1637/11793-010418-ResNote.1	Avian Dis. 2018 Jun;62(2):237-240. doi: 10.1637/11793-010418-ResNote.1.
Alaska & Wildlife	1	1	1	22222690	Genetic structure of Pacific Flyway avian influenza viruses is shaped by geographic location, host species, and sampling period	Girard YA	Virus Genes	2012	2012/01/07			10.1007/s11262-011-0706-5	Virus Genes. 2012 Jun;44(3):415-28. doi: 10.1007/s11262-011-0706-5. Epub 2012 Jan 6.
Arctic & Wildlife	1	0		33033298	Data mining and model-predicting a global disease reservoir for low-pathogenic Avian Influenza (A) in the wider pacific rim using big data sets	Gulyaeva M	Sci Rep	2020	2020/10/09	PMC7545095		10.1038/s41598-020-73664-2	Sci Rep. 2020 Oct 8;10(1):16817. doi: 10.1038/s41598-020-73664-2.
Canada & Wildlife	1	0		20688710	Canada geese and the epidemiology of avian influenza viruses	Harris MT	J Wildl Dis	2010	2010/08/07			10.7589/0090-3558-46.3.981	J Wildl Dis. 2010 Jul;46(3):981-7. doi: 10.7589/0090-3558-46.3.981.
Alaska & Wildlife	1	0		3753204	Cold-adapted reassortants of influenza A virus: pathogenicity of A/Ann Arbor/6/60 X A/Alaska/6/77 reassortant viruses in vivo and in vitro	Heath AW	Arch Virol	1986	1986/01/01			10.1007/BF01316727	Arch Virol. 1986;91(1-2):53-60. doi: 10.1007/BF01316727.
Russia & Wildlife	1	0		25741006	Alterations in hemagglutinin receptor-binding specificity accompany the emergence of highly pathogenic avian influenza viruses	Heider A	J Virol	2015	2015/03/06	PMC4442535		10.1128/JVI.03304-14	J Virol. 2015 May;89(10):5395-405. doi: 10.1128/JVI.03304-14. Epub 2015 Mar 4.
Alaska & Wildlife	1	1	1	21995264	Cross-seasonal patterns of avian influenza virus in breeding and wintering migratory birds: a flyway perspective	Hill NJ	Vector Borne Zoonotic Dis	2012	2011/10/15	PMC3300065		10.1089/vbz.2010.0246	Vector Borne Zoonotic Dis. 2012 Mar;12(3):243-53. doi: 10.1089/vbz.2010.0246. Epub 2011 Oct 13.
Alaska & Wildlife	1	0		22971007	Migration strategy affects avian influenza dynamics in mallards (Anas platyrhynchos)	Hill NJ	Mol Ecol	2012	2012/09/14			10.1111/j.1365-294X.2012.05735.x	Mol Ecol. 2012 Dec;21(24):5986-99. doi: 10.1111/j.1365-294X.2012.05735.x. Epub 2012 Sep 13.
Canada & Bird	1	0		81267	Novel influenza A viruses isolated from Canadian feral ducks: including strains antigenically related to swine influenza (Hsw1N1) viruses	Hinshaw VS	J Gen Virol	1978	1978/10/01			10.1099/0022-1317-41-1-115	J Gen Virol. 1978 Oct;41(1):115-27. doi: 10.1099/0022-1317-41-1-115.
Arctic & Warming	1	0		33809626	Possible Roles of Permafrost Melting, Atmospheric Transport, and Solar Irradiance in the Development of Major Coronavirus and Influenza Pandemics	Hofmeister AM	Int J Environ Res Public Health	2021	2021/04/03	PMC8000708		10.3390/ijerph18063055	Int J Environ Res Public Health. 2021 Mar 16;18(6):3055. doi: 10.3390/ijerph18063055.
Canada & Wildlife	1	1	1	24889254	Perpetuation and reassortment of gull influenza A viruses in Atlantic North America	Huang Y	Virology	2014	2014/06/04			10.1016/j.virol.2014.04.009	Virology. 2014 May;456-457:353-63. doi: 10.1016/j.virol.2014.04.009. Epub 2014 Apr 28.
Canada & Wildlife	1	1	1	24462905	Diverse inter-continental and host lineage reassortant avian influenza A viruses in pelagic seabirds	Huang Y	Infect Genet Evol	2014	2014/01/28			10.1016/j.meegid.2014.01.014	Infect Genet Evol. 2014 Mar;22:103-11. doi: 10.1016/j.meegid.2014.01.014. Epub 2014 Jan 23.
Greenland & Wildlife	1	1	1	23402125	Surveillance for avian influenza viruses in wild birds in Denmark and Greenland, 2007-10	Hjulsager CK	Avian Dis	2012	2013/02/14			10.1637/10190-041012-ResNote.1	Avian Dis. 2012 Dec;56(4 Suppl):992-8. doi: 10.1637/10190-041012-ResNote.1.
Canada & Wildlife	1	0		32054908	Waterfowl occurrence and residence time as indicators of H5 and H7 avian influenza in North American Poultry	Humphreys JM	Sci Rep	2020	2020/02/15	PMC7018751		10.1038/s41598-020-59077-1	Sci Rep. 2020 Feb 13;10(1):2592. doi: 10.1038/s41598-020-59077-1.
Russia & Wildlife	1	0		18590134	[Isolation of influenza virus A (Orthomyxoviridae, Influenza A virus), Dhori virus (Orthomyxoviridae, Thogotovirus), and Newcastle's disease virus (Paromyxoviridae, Avulavirus) on the Malyi Zhemchuzhnyi Island in the north-western area of the Caspian Sea]	Iashkulov KB	Vopr Virusol	2008	2008/07/02				Vopr Virusol. 2008 May-Jun;53(3):34-8.
Russia & Wildlife	1	0		18368779	[Isolation and molecular characterization of the influenza virus A/H5N1 strains isolated during outbreak of avian influenza among birds in the European part of Russia in 2005: strain with ozeltamivir-resistance mutation was found]	Iatsyshina SB	Mol Gen Mikrobiol Virusol	2008	2008/03/29				Mol Gen Mikrobiol Virusol. 2008;(1):26-34.
Russia & Avian	1	0		24012948	Monitoring of influenza viruses in Western Siberia in 2008-2012	Ilyicheva T	Infect Genet Evol	2013	2013/09/10			10.1016/j.meegid.2013.08.025	Infect Genet Evol. 2013 Dec;20:177-87. doi: 10.1016/j.meegid.2013.08.025. Epub 2013 Sep 5.
Russia & Avian	1	0		16981495	[Circulation of type A influenza viruses in poultry during the pre-epizootic period of 2005 in Novosibirsk region]	Iushkov IuG	Zh Mikrobiol Epidemiol Immunobiol	2006	2006/09/20				Zh Mikrobiol Epidemiol Immunobiol. 2006 Jul-Aug;(5):59-65.
Subarctic & Environment	1	0		24678699	Decline in temperature and humidity increases the occurrence of influenza in cold climate	Jaakkola K	Environ Health	2014	2014/04/01	PMC3978084		10.1186/1476-069X-13-22	Environ Health. 2014 Mar 28;13(1):22. doi: 10.1186/1476-069X-13-22.
Alaska & Wildlife	1	0		24807362	Avian influenza virus antibodies in Pacific Coast Red Knots (Calidris canutus roselaari)	Johnson JA	J Wildl Dis	2014	2014/05/09			10.7589/2013-04-016	J Wildl Dis. 2014 Jul;50(3):671-5. doi: 10.7589/2013-04-016. Epub 2014 May 7.
Norway & Wildlife	1	1	0	17494599	Avian influenza virus screening in wild waterfowl in Norway, 2005	Jonassen CM	Avian Dis	2007	2007/05/15			10.1637/7555-033106R1.1	Avian Dis. 2007 Mar;51(1 Suppl):425-8. doi: 10.1637/7555-033106R1.1.
Canada & Wildlife	1	0		29307740	Pathogenicity and transmissibility of three avian influenza A (H5N6) viruses isolated from wild birds	Kang Y	J Infect	2018	2018/01/09			10.1016/j.jinf.2017.12.012	J Infect. 2018 Mar;76(3):286-294. doi: 10.1016/j.jinf.2017.12.012. Epub 2018 Jan 4.
Norway & Wildlife	1	0		19558648	Infectious salmon anaemia virus (ISAV) isolated from the ISA disease outbreaks in Chile diverged from ISAV isolates from Norway around 1996 and was disseminated around 2005, based on surface glycoprotein gene sequences	Kibenge FS	Virol J	2009	2009/06/30	PMC2710322		10.1186/1743-422X-6-88	Virol J. 2009 Jun 26;6:88. doi: 10.1186/1743-422X-6-88.
Russia & Wildlife	1	0		16981506	[Epizootic situation with the avian flu in Kurgan region]	Kilevoĭ LIa	Zh Mikrobiol Epidemiol Immunobiol	2006	2006/09/20				Zh Mikrobiol Epidemiol Immunobiol. 2006 Jul-Aug;(5):101-3.
Russia & Wildlife	1	0		18389623	[Molecular characteristic of influenza virus A H5N1 Strains isolated from poultry in Kurgan Region in 2005]	Kiselev OI	Mol Biol (Mosk)	2008	2008/04/09				Mol Biol (Mosk). 2008 Jan-Feb;42(1):78-87.
Sweden & Avian	1	0		18837987	Molecular characterization of highly pathogenic H5N1 avian influenza viruses isolated in Sweden in 2006	Kiss I	Virol J	2008	2008/10/08	PMC2569034		10.1186/1743-422X-5-113	Virol J. 2008 Oct 6;5:113. doi: 10.1186/1743-422X-5-113.
Sweden & Avian	1	0		21156041	Swine influenza viruses isolated in 1983, 2002 and 2009 in Sweden exemplify different lineages	Kiss I	Acta Vet Scand	2010	2010/12/16	PMC3019120		10.1186/1751-0147-52-65	Acta Vet Scand. 2010 Dec 14;52(1):65. doi: 10.1186/1751-0147-52-65.
Canada & Wildlife	1	0		23060517	Antibodies to avian influenza viruses in Canada geese (Branta canadensis): a potential surveillance tool?	Kistler WM	J Wildl Dis	2012	2012/10/13			10.7589/2011-02-046	J Wildl Dis. 2012 Oct;48(4):1097-101. doi: 10.7589/2011-02-046.
Russia & Wildlife	1	0		20200028	Dynamics and ecological consequences of avian influenza virus infection in greater white-fronted geese in their winter staging areas	Kleijn D	Proc Biol Sci	2010	2010/03/05	PMC2880101		10.1098/rspb.2010.0026	Proc Biol Sci. 2010 Jul 7;277(1690):2041-8. doi: 10.1098/rspb.2010.0026. Epub 2010 Mar 3.
Arctic & Wildlife	1	1	0	32585505	Seroprevalence of avian influenza in Baltic common eiders (Somateria mollissima) and pink-footed geese (Anser brachyrhynchus)	Lam SS	Environ Int	2020	2020/06/26			10.1016/j.envint.2020.105873	Environ Int. 2020 Sep;142:105873. doi: 10.1016/j.envint.2020.105873. Epub 2020 Jun 22.
Canada & Wildlife	1	0		7337915	The extent and control of avian influenza in Canada	Lang G	Can Vet J	1981	1981/12/01	PMC1790007			Can Vet J. 1981 Dec;22(12):377-81.
Sweden & Avian	1	1	0	19129127	Effects of influenza A virus infection on migrating mallard ducks	Latorre-Margalef N	Proc Biol Sci	2009	2009/01/09	PMC2679067		10.1098/rspb.2008.1501	Proc Biol Sci. 2009 Mar 22;276(1659):1029-36. doi: 10.1098/rspb.2008.1501.
Sweden & Wildlife	1	1	0	24573857	Long-term variation in influenza A virus prevalence and subtype diversity in migratory mallards in northern Europe	Latorre-Margalef N	Proc Biol Sci	2014	2014/02/28	PMC3953854		10.1098/rspb.2014.0098	Proc Biol Sci. 2014 Feb 26;281(1781):20140098. doi: 10.1098/rspb.2014.0098. Print 2014 Apr 22.
Sweden & Wildlife	1	0		28640898	Competition between influenza A virus subtypes through heterosubtypic immunity modulates re-infection and antibody dynamics in the mallard duck	Latorre-Margalef N	PLoS Pathog	2017	2017/06/23	PMC5481145		10.1371/journal.ppat.1006419	PLoS Pathog. 2017 Jun 22;13(6):e1006419. doi: 10.1371/journal.ppat.1006419. eCollection 2017 Jun.
Russia & Wildlife	1	1	0	27875109	Novel Reassortant Clade 2.3.4.4 Avian Influenza A(H5N8) Virus in Wild Aquatic Birds, Russia, 2016	Lee DH	Emerg Infect Dis	2017	2016/11/23	PMC5324796		10.3201/eid2302.161252	Emerg Infect Dis. 2017 Feb;23(2):359-360. doi: 10.3201/eid2302.161252. Epub 2017 Feb 15.
Alaska & Wildlife	1	1	1	28098546	Reoccurrence of Avian Influenza A(H5N2) Virus Clade 2.3.4.4 in Wild Birds, Alaska, USA, 2016	Lee DH	Emerg Infect Dis	2017	2017/01/19	PMC5324823		10.3201/eid2302.161616	Emerg Infect Dis. 2017 Feb;23(2):365-367. doi: 10.3201/eid2302.161616.
Canada & Wildlife	1	0		31054314	Intercontinental spread of Asian-origin H7 avian influenza viruses by captive bird trade in 1990's	Lee DH	Infect Genet Evol	2019	2019/05/05			10.1016/j.meegid.2019.04.028	Infect Genet Evol. 2019 Sep;73:146-150. doi: 10.1016/j.meegid.2019.04.028. Epub 2019 May 1.
Norway & Avian	1	1	1	31660964	No evidence of avian influenza antibodies in two species of raptor nestlings inhabiting Norway	Lee MM	BMC Vet Res	2019	2019/10/30	PMC6816168		10.1186/s12917-019-2133-0	BMC Vet Res. 2019 Oct 28;15(1):375. doi: 10.1186/s12917-019-2133-0.
Russia & Avian	1	0		33400615	Emergence and spread of novel H5N8, H5N5 and H5N1 clade 2.3.4.4 highly pathogenic avian influenza in 2020	Lewis NS	Emerg Microbes Infect	2021	2021/01/05	PMC7832535		10.1080/22221751.2021.1872355	Emerg Microbes Infect. 2021 Dec;10(1):148-151. doi: 10.1080/22221751.2021.1872355.
Russia & Wildlife	1	0		24885233	Global spatiotemporal and genetic footprint of the H5N1 avian influenza virus	Li R	Int J Health Geogr	2014	2014/06/03	PMC4059878		10.1186/1476-072X-13-14	Int J Health Geogr. 2014 May 21;13:14. doi: 10.1186/1476-072X-13-14.
Siberia & Avian	1	0		25061965	Global and local persistence of influenza A(H5N1) virus	Li X	Emerg Infect Dis	2014	2014/07/26	PMC4111173		10.3201/eid2008.130910	Emerg Infect Dis. 2014 Aug;20(8):1287-95. doi: 10.3201/eid2008.130910.
Subarctic & Wildlife	1	1	1	28092966	Avian influenza prevalence among hunter-harvested birds in a remote Canadian First Nation community	Liberda EN	Rural Remote Health	2017	2017/01/18			10.22605/rrh3864	Rural Remote Health. 2017 Jan-Mar;17(1):3864. doi: 10.22605/rrh3864. Epub 2017 Jan 11.
Norway & Wildlife	1	0		16398331	Screening of feral pigeon (Colomba livia), mallard (Anas platyrhynchos) and graylag goose (Anser anser) populations for Campylobacter spp., Salmonella spp., avian influenza virus and avian paramyxovirus	Lillehaug A	Acta Vet Scand	2005	2006/01/10	PMC1618971		10.1186/1751-0147-46-193	Acta Vet Scand. 2005;46(4):193-202. doi: 10.1186/1751-0147-46-193.
Finland & Wildlife	1	1	0	18307758	Orthomyxo-, paramyxo- and flavivirus infections in wild waterfowl in Finland	Lindh E	Virol J	2008	2008/03/01	PMC2292701		10.1186/1743-422X-5-35	Virol J. 2008 Feb 28;5:35. doi: 10.1186/1743-422X-5-35.
Finland & Wildlife	1	1	0	25042528	Molecular epidemiology of H9N2 influenza viruses in Northern Europe	Lindh E	Vet Microbiol	2014	2014/07/22			10.1016/j.vetmic.2014.06.020	Vet Microbiol. 2014 Aug 27;172(3-4):548-54. doi: 10.1016/j.vetmic.2014.06.020. Epub 2014 Jul 2.
Finland & Wildlife	1	1	0	28384060	GENETIC CHARACTERIZATION OF H13 AND H16 INFLUENZA A VIRUSES IN GULLS (LARUS SPP.) WITH CLINICALLY SEVERE DISEASE AND CONCURRENT CIRCOVIRUS INFECTION	Lindh E	J Wildl Dis	2017	2017/04/07			10.7589/2016-09-212	J Wildl Dis. 2017 Jul;53(3):561-571. doi: 10.7589/2016-09-212. Epub 2017 Apr 6.
Russia & Avian	1	0		8722298	Changes of morphological, biological and antigenic properties of avian influenza A virus haemagglutinin H2 in the course of adaptation to new host	Lipatov AS	Acta Virol	1995	1995/12/01				Acta Virol. 1995 Dec;39(5-6):279-81.
Russia & Wildlife	1	1	0	17553267	Influenza (H5N1) viruses in poultry, Russian Federation, 2005-2006	Lipatov AS	Emerg Infect Dis	2007	2007/06/08	PMC2725974		10.3201/eid1304.061266	Emerg Infect Dis. 2007 Apr;13(4):539-46. doi: 10.3201/eid1304.061266.
Sweden & Wildlife	1	0		30337766	The roles of migratory and resident birds in local avian influenza infection dynamics	Lisovski S	J Appl Ecol	2018	2018/10/20	PMC6188652	NIHMS954606	10.1111/1365-2664.13154	J Appl Ecol. 2018 Nov;55(6):2963-2975. doi: 10.1111/1365-2664.13154. Epub 2018 Mar 26.
Russia & Wildlife	1	1	0	20521683	Evolution of highly pathogenic avian influenza H5N1 virus in natural ecosystems of northern Eurasia (2005-08)	Lvov DK	Avian Dis	2010	2010/06/05			10.1637/8893-042509-Review.1	Avian Dis. 2010 Mar;54(1 Suppl):483-95. doi: 10.1637/8893-042509-Review.1.
Russia & Avian	1	0		155358	[Isolation of influenza virus with the antigenic formula Hav4 Nav2 and Hav5 Nav2 during epizootic infection among sea gulls in the Astrakhan district in the summer of 1976]	L'vov DK	Vopr Virusol	1978	1978/07/01				Vopr Virusol. 1978 Jul-Aug;(4):399-403.
Russia & Wildlife	1	0		16830601	[Population interactions in biological system: influenza virus A--wild and domestic animals--human; reasons and consequences of introduction high pathogenic influenza virus A/H5N1 on Russian territory]	L'vov DK	Zh Mikrobiol Epidemiol Immunobiol	2006	2006/07/13				Zh Mikrobiol Epidemiol Immunobiol. 2006 May-Jun;(3):96-100.
Russia & Wildlife	1	0		16515035	[Isolation of influenza A/H5N1 virus strains from poultry and wild birds in West Siberia during epizooty (July 2005) and their depositing to the state collection of viruses (August 8, 2005)]	L'vov DK	Vopr Virusol	2006	2006/03/07				Vopr Virusol. 2006 Jan-Feb;51(1):11-4.
Russia & Wildlife	1	0		17214076	[Isolation of highly pathogenic avian influenza (HPAI) A/5H5N1 strains from wild birds in the epizootic outbreak on the Ubsu-Nur Lake (June 2006) and their incorporation to the Russian Federation State Collection of viruses (July 3, 2006)]	L'vov DK	Vopr Virusol	2006	2007/01/12				Vopr Virusol. 2006 Nov-Dec;51(6):14-8.
Russia & Wildlife	1	0		16756172	[Molecular genetic analysis of the biological properties of highly pathogenic influenza A/H5N1 virus strains isolated from wild birds and poultry during epizooty in Western Siberia (July 2005)]	L'vov DK	Vopr Virusol	2006	2006/06/08				Vopr Virusol. 2006 Mar-Apr;51(2):15-9.
Russia & Wildlife	1	0		19069785	[The first break-through of the genotype 2.3.2 of high-virulence influenza A virus A/HSN1, which is new for Russia, in the Far East]	L'vov DK	Vopr Virusol	2008	2008/12/17				Vopr Virusol. 2008 Sep-Oct;53(5):4-8.
Russia & Wildlife	1	0		18450104	[Epizooty caused by high-virulent influenza virus A/H5N1 of genotype 2.2 (Qinghai-Siberian) among wild and domestic birds on the paths of fall migrations to the north-western part of the Azov Sea basin (Krasnodar Territory)]	L'vov DK	Vopr Virusol	2008	2008/05/03				Vopr Virusol. 2008 Mar-Apr;53(2):14-9.
Russia & Wildlife	1	0		20521686	H5N1 avian influenza outbreak in the Far East of Russia in 2008: new introduction	Manin TB	Avian Dis	2010	2010/06/05			10.1637/8732-032509-Case.1	Avian Dis. 2010 Mar;54(1 Suppl):509-12. doi: 10.1637/8732-032509-Case.1.
Russia & Wildlife	1	1	1	30296682	Isolation and characterization of H5Nx highly pathogenic avian influenza viruses of clade 2.3.4.4 in Russia	Marchenko V	Virology	2018	2018/10/09			10.1016/j.virol.2018.09.024	Virology. 2018 Dec;525:216-223. doi: 10.1016/j.virol.2018.09.024. Epub 2018 Oct 5.
Russia & Wildlife	1	0		22312899	[Characterization of the H5N1 influenza virus isolated during an outbreak among wild birds in Russia (Tuva Republic) in 2010]	Marchenko VIu	Mol Gen Mikrobiol Virusol	2011	2012/02/09				Mol Gen Mikrobiol Virusol. 2011;(4):36-40.
Russia & Wildlife	1	1	1	26306756	Influenza A(H5N8) virus isolation in Russia, 2014	Marchenko VY	Arch Virol	2015	2015/08/27			10.1007/s00705-015-2570-4	Arch Virol. 2015 Nov;160(11):2857-60. doi: 10.1007/s00705-015-2570-4. Epub 2015 Aug 26.
Russia & Wildlife	1	0		26935914	Highly pathogenic influenza H5N1 virus of clade 2.3.2.1c in Western Siberia	Marchenko VY	Arch Virol	2016	2016/03/04			10.1007/s00705-016-2800-4	Arch Virol. 2016 Jun;161(6):1645-9. doi: 10.1007/s00705-016-2800-4. Epub 2016 Mar 3.
Russia & Wildlife	1	1	0	28138776	Reintroduction of highly pathogenic avian influenza A/H5N8 virus of clade 2.3.4.4. in Russia	Marchenko VY	Arch Virol	2017	2017/02/01			10.1007/s00705-017-3246-z	Arch Virol. 2017 May;162(5):1381-1385. doi: 10.1007/s00705-017-3246-z. Epub 2017 Jan 30.
Russia & Avian	1	0		9201232	Avian influenza A viruses differ from human viruses by recognition of sialyloligosaccharides and gangliosides and by a higher conservation of the HA receptor-binding site	Matrosovich MN	Virology	1997	1997/06/23			10.1006/viro.1997.8580	Virology. 1997 Jun 23;233(1):224-34. doi: 10.1006/viro.1997.8580.
Sweden & Avian	1	0		21253862	Comparison of two H1N2 swine influenza A viruses from disease outbreaks in pigs in Sweden during 2009 and 2010	Metreveli G	Virus Genes	2011	2011/01/22			10.1007/s11262-011-0571-2	Virus Genes. 2011 Apr;42(2):236-44. doi: 10.1007/s11262-011-0571-2. Epub 2011 Jan 21.
Russia & Wildlife	1	1	1	31242207	Phylogeographic evidence for the inter- and intracontinental dissemination of avian influenza viruses via migration flyways	Mine J	PLoS One	2019	2019/06/27	PMC6594620		10.1371/journal.pone.0218506	PLoS One. 2019 Jun 26;14(6):e0218506. doi: 10.1371/journal.pone.0218506. eCollection 2019.
Norway & Avian	1	0		24426296	Isolation and characterization of low pathogenic H9N2 avian influenza A viruses from a healthy flock and its comparison to other H9N2 isolates	Munir M	Indian J Virol	2013	2014/01/16	PMC3832700		10.1007/s13337-013-0144-1	Indian J Virol. 2013 Dec;24(3):342-8. doi: 10.1007/s13337-013-0144-1. Epub 2013 Jul 24.
Alaska & Wildlife	1	0		7425858	Temperature-sensitive mutants of influenza A virus. Transfer of the two ts-1A2 ts lesions present in the Udorn/72-ts-1A2 donor virus to the influenza A/Alaska/6/77 (H3N2) wild type virus	Murphy BR	Arch Virol	1980	1980/01/01			10.1007/BF01317329	Arch Virol. 1980;65(2):175-86. doi: 10.1007/BF01317329.
Sweden & Wildlife	1	0		31381759	Global patterns of avian influenza A (H7): virus evolution and zoonotic threats	Naguib MM	FEMS Microbiol Rev	2019	2019/08/06	PMC8038931		10.1093/femsre/fuz019	FEMS Microbiol Rev. 2019 Nov 1;43(6):608-621. doi: 10.1093/femsre/fuz019.
Canada & Wildlife	1	0		26110538	Demographic and Spatiotemporal Patterns of Avian Influenza Infection at the Continental Scale, and in Relation to Annual Life Cycle of a Migratory Host	Nallar R	PLoS One	2015	2015/06/26	PMC4481355		10.1371/journal.pone.0130662	PLoS One. 2015 Jun 25;10(6):e0130662. doi: 10.1371/journal.pone.0130662. eCollection 2015.
Russia & Avian	1	1	1	10881676	Precursor genes of future pandemic influenza viruses are perpetuated in ducks nesting in Siberia	Okazaki K	Arch Virol	2000	2000/07/06			10.1007/s007050050681	Arch Virol. 2000;145(5):885-93. doi: 10.1007/s007050050681.
Russia & Wildlife	1	0		16981489	[Incidence of avian flu worldwide and in the Russian Federation. Improvement of surveillance and control of influenza during preparation for potential pandemic]	Onishchenko GG	Zh Mikrobiol Epidemiol Immunobiol	2006	2006/09/20				Zh Mikrobiol Epidemiol Immunobiol. 2006 Jul-Aug;(5):4-17.
Russia & Avian	1	0		16981493	[Study of highly pathogenic H5N1 influenza virus isolated from sick and dead birds in Western Siberia]	Onishchenko GG	Zh Mikrobiol Epidemiol Immunobiol	2006	2006/09/20				Zh Mikrobiol Epidemiol Immunobiol. 2006 Jul-Aug;(5):47-54.
Russia & Avian	1	0		18041121	[Molecular-biologic analysis of avian influenza virus isolates which caused epizootics on the south of West Siberia and in Crimea]	Onishchenko GG	Zh Mikrobiol Epidemiol Immunobiol	2007	2007/11/28				Zh Mikrobiol Epidemiol Immunobiol. 2007 Sep-Oct;(5):28-32.
Siberia & Avian	1	0		17037371	[Highly pathogenic avian influenza--monitoring of migratory waterfowl]	Otsuki K	Nihon Rinsho	2006	2006/10/14				Nihon Rinsho. 2006 Oct;64(10):1934-41.
Canada & Wildlife	1	1	0	28475626	The ecology of avian influenza viruses in wild dabbling ducks (Anas spp.) in Canada	Papp Z	PLoS One	2017	2017/05/06	PMC5419510		10.1371/journal.pone.0176297	PLoS One. 2017 May 5;12(5):e0176297. doi: 10.1371/journal.pone.0176297. eCollection 2017.
Arctic & Environment	1	0		18258072	International Circumpolar Surveillance, an Arctic network for the surveillance of infectious diseases	Parkinson AJ	Emerg Infect Dis	2008	2008/02/09	PMC2600151		10.3201/eid1401.070717	Emerg Infect Dis. 2008 Jan;14(1):18-24. doi: 10.3201/eid1401.070717.
Canada & Wildlife	1	1	1	18258085	Wild bird influenza survey, Canada, 2005	Parmley EJ	Emerg Infect Dis	2008	2008/02/09	PMC2600159		10.3201/eid1401.061562	Emerg Infect Dis. 2008 Jan;14(1):84-7. doi: 10.3201/eid1401.061562.
Canada & Wildlife	1	0		21392313	Canada's inter-agency wild bird influenza survey	Parmley J	Integr Zool	2009	2011/03/12			10.1111/j.1749-4877.2009.00177.x	Integr Zool. 2009 Dec;4(4):409-17. doi: 10.1111/j.1749-4877.2009.00177.x.
Canada & Wildlife	1	0		18258030	Susceptibility of Canada Geese (Branta canadensis) to highly pathogenic avian influenza virus (H5N1)	Pasick J	Emerg Infect Dis	2007	2008/02/09	PMC2876756		10.3201/eid1312.070502	Emerg Infect Dis. 2007 Dec;13(12):1821-7. doi: 10.3201/eid1312.070502.
Canada & Wildlife	1	0		19618638	Avian influenza: the Canadian experience	Pasick J	Rev Sci Tech	2009	2009/07/22			10.20506/rst.28.1.1875	Rev Sci Tech. 2009 Apr;28(1):349-58. doi: 10.20506/rst.28.1.1875.
Canada & Wildlife	1	1	0	20521675	Survey of influenza A viruses circulating in wild birds in Canada 2005 to 2007	Pasick J	Avian Dis	2010	2010/06/05			10.1637/8800-040109-Reg.1	Avian Dis. 2010 Mar;54(1 Suppl):440-5. doi: 10.1637/8800-040109-Reg.1.
Arctic & Wildlife	1	1	1	17330144	Highly pathogenic H5N1 avian influenza: entry pathways into North America via bird migration	Peterson AT	PLoS One	2007	2007/03/03	PMC1803015		10.1371/journal.pone.0000261	PLoS One. 2007 Feb 28;2(2):e261. doi: 10.1371/journal.pone.0000261.
Russia & Avian	1	0		156983	[Properties of the influenza viruses isolated in 1976 from gulls in Astrakhan Province]	Podcherniaeva RIa	Vopr Virusol	1979	1979/05/01				Vopr Virusol. 1979 May-Jun;(3):227-32.
Russia & Wildlife	1	0		16981499	[Operational experience with liquidation of avian flu foci in Zdvinsk of Novosibirsk region]	Ponotova LV	Zh Mikrobiol Epidemiol Immunobiol	2006	2006/09/20				Zh Mikrobiol Epidemiol Immunobiol. 2006 Jul-Aug;(5):79-81.
Siberia & Environment	1	0		6868892	[Aspects of the immunological status of the population of the western section of the Baĭkal-Amur mainline]	Popkova SM	Zh Mikrobiol Epidemiol Immunobiol	1983	1983/04/01				Zh Mikrobiol Epidemiol Immunobiol. 1983 Apr;(4):95-7.
Russia & Avian	1	1	0	34072256	Diversity and Reassortment Rate of Influenza A Viruses in Wild Ducks and Gulls	Postnikova Y	Viruses	2021	2021/06/02	PMC8230314		10.3390/v13061010	Viruses. 2021 May 27;13(6):1010. doi: 10.3390/v13061010.
Arctic & Wildlife	1	0		33105913	Influenza A Viruses in Ruddy Turnstones (Arenaria interpres); Connecting Wintering and Migratory Sites with an Ecological Hotspot at Delaware Bay	Poulson R	Viruses	2020	2020/10/27	PMC7690596		10.3390/v12111205	Viruses. 2020 Oct 22;12(11):1205. doi: 10.3390/v12111205.
Russia & Avian	1	0		16981498	[Operational experience of disinfection service of Novosibirsk region with liquidation of the avian flu foci in Kupinsky, Zdvinsky and Dovolensky regions in August, 2005]	Putsyn VV	Zh Mikrobiol Epidemiol Immunobiol	2006	2006/09/20				Zh Mikrobiol Epidemiol Immunobiol. 2006 Jul-Aug;(5):73-8.
Russia & Wildlife	1	0		506200	[Influenza virus A/Anas acute/Maritime Territory/730/76(H3N2) isolated from wild ducks in the Maritime Territory]	Pysina TV	Vopr Virusol	1979	1979/09/01				Vopr Virusol. 1979 Sep-Oct;(5):489-93.
Alaska & Wildlife	1	1	1	20709346	Transmission and reassortment of avian influenza viruses at the Asian-North American interface	Ramey AM	Virology	2010	2010/08/17			10.1016/j.virol.2010.07.031	Virology. 2010 Oct 25;406(2):352-9. doi: 10.1016/j.virol.2010.07.031. Epub 2010 Aug 14.
Alaska & Avian	1	1	1	20227102	Intercontinental reassortment and genomic variation of low pathogenic avian influenza viruses isolated from northern pintails (Anas acuta) in Alaska: examining the evidence through space and time	Ramey AM	Virology	2010	2010/03/16			10.1016/j.virol.2010.02.006	Virology. 2010 Jun 5;401(2):179-89. doi: 10.1016/j.virol.2010.02.006. Epub 2010 Mar 12.
Alaska & Wildlife	1	0		24788792	Genomic characterization of H14 subtype Influenza A viruses in new world waterfowl and experimental infectivity in mallards (Anas platyrhynchos)	Ramey AM	PLoS One	2014	2014/05/03	PMC4006863		10.1371/journal.pone.0095620	PLoS One. 2014 May 1;9(5):e95620. doi: 10.1371/journal.pone.0095620. eCollection 2014.
Alaska & Wildlife	1	1	1	26267465	Sampling of Sea Ducks for Influenza A Viruses in Alaska during Winter Provides Lack of Evidence for Epidemiologic Peak of Infection	Ramey AM	J Wildl Dis	2015	2015/08/13			10.7589/2015-03-057	J Wildl Dis. 2015 Oct;51(4):938-41. doi: 10.7589/2015-03-057. Epub 2015 Aug 12.
Alaska & Wildlife	1	1	1	27036114	Surveillance for Eurasian-origin and intercontinental reassortant highly pathogenic influenza A viruses in Alaska, spring and summer 2015	Ramey AM	Virol J	2016	2016/04/03	PMC4815243		10.1186/s12985-016-0511-9	Virol J. 2016 Mar 31;13:55. doi: 10.1186/s12985-016-0511-9.
Alaska & Wildlife	1	1	1	27587808	H9N2 Influenza A Virus Isolated from a Greater White-Fronted Wild Goose (Anser albifrons) in Alaska Has a Mutation in the PB2 Gene, Which Is Associated with Pathogenicity in Human Pandemic 2009 H1N1	Reeves AB	Genome Announc	2016	2016/09/03	PMC5009965		10.1128/genomeA.00869-16	Genome Announc. 2016 Sep 1;4(5):e00869-16. doi: 10.1128/genomeA.00869-16.
Alaska & Wildlife	1	1	1	32817149	The Genome Sequence of an H6N5 Influenza A Virus Strain Isolated from a Northern Pintail (Anas acuta) Sampled in Alaska, USA, Shares High Identity with That of a South Korean Wild Bird Strain	Reeves AB	Microbiol Resour Announc	2020	2020/08/21	PMC7427187		10.1128/MRA.00639-20	Microbiol Resour Announc. 2020 Aug 13;9(33):e00639-20. doi: 10.1128/MRA.00639-20.
Russia & Wildlife	1	0		21054819	First reported incursion of highly pathogenic notifiable avian influenza A H5N1 viruses from clade 2.3.2 into European poultry	Reid SM	Transbound Emerg Dis	2011	2010/11/09	PMC3582342	NIHMS241260	10.1111/j.1865-1682.2010.01175.x	Transbound Emerg Dis. 2011 Feb;58(1):76-8. doi: 10.1111/j.1865-1682.2010.01175.x. Epub 2010 Nov 5.
Norway & Avian	1	0		27522300	Companion Animals as a Source of Viruses for Human Beings and Food Production Animals	Reperant LA	J Comp Pathol	2016	2016/08/15			10.1016/j.jcpa.2016.07.006	J Comp Pathol. 2016 Jul;155(1 Suppl 1):S41-53. doi: 10.1016/j.jcpa.2016.07.006. Epub 2016 Aug 10.
Russia & Wildlife	1	0		21634047	International disease monitoring, October to December, 2010	Roberts H	Vet Rec	2011	2011/06/03			10.1136/vr.d639	Vet Rec. 2011 Feb 12;168(6):152-5. doi: 10.1136/vr.d639.
Russia & Avian	1	0		6730433	[Incidence of influenza virus infection in black-headed gulls]	Roslaia IG	Vopr Virusol	1984	1984/03/01				Vopr Virusol. 1984 Mar-Apr;29(2):155-7.
Russia & Wildlife	1	0		16981507	[Avian flu in Altay territory]	Saldan IP	Zh Mikrobiol Epidemiol Immunobiol	2006	2006/09/20				Zh Mikrobiol Epidemiol Immunobiol. 2006 Jul-Aug;(5):104-5.
Russia & Wildlife	1	0		21476486	Virological surveillance and phylogenetic analysis of the PB2 genes of influenza viruses isolated from wild water birds flying from their nesting lakes in Siberia to Hokkaido, Japan in autumn	Samad RA	Jpn J Vet Res	2011	2011/04/12				Jpn J Vet Res. 2011 Feb;59(1):15-22.
Canada & Wildlife	1	1	0	8381747	Wild ducks are the reservoir for only a limited number of influenza A subtypes	Sharp GB	Epidemiol Infect	1993	1993/02/01	PMC2271956		10.1017/s0950268800050780	Epidemiol Infect. 1993 Feb;110(1):161-76. doi: 10.1017/s0950268800050780.
Russia & Wildlife	1	1	0	20432047	Genetic and biological characterization of avian influenza H5N1 viruses isolated from wild birds and poultry in Western Siberia	Sharshov K	Arch Virol	2010	2010/05/01			10.1007/s00705-010-0676-2	Arch Virol. 2010 Jul;155(7):1145-50. doi: 10.1007/s00705-010-0676-2. Epub 2010 Apr 30.
Russia & Avian	1	0		20218341	[Characteristic of high pathogenic avian influenza virus subtype H5N1 isolated from common gull (Larus canus)]	Sharshov KA	Zh Mikrobiol Epidemiol Immunobiol	2010	2010/03/12				Zh Mikrobiol Epidemiol Immunobiol. 2010 Jan-Feb;(1):29-32.
Russia & Wildlife	1	0		19459406	[Dinamics in virulence of highly pathogenic influenza A virus A/H5N1 genotype 2.2 strains isolated in Russia in 2005-2007]	Shchelkanov MIu	Vopr Virusol	2009	2009/05/23				Vopr Virusol. 2009 Mar-Apr;54(2):8-17.
Alaska & Wildlife	1	0		20059316	Influenza A viruses in wild birds of the Pacific flyway, 2005-2008	Siembieda JL	Vector Borne Zoonotic Dis	2010	2010/01/12	PMC2976637		10.1089/vbz.2009.0095	Vector Borne Zoonotic Dis. 2010 Oct;10(8):793-800. doi: 10.1089/vbz.2009.0095. Epub 2010 Jan 8.
Russia & Wildlife	1	1	0	23050460	Surveillance of influenza A virus in wild birds in the Asian portion of Russia in 2008	Sivay MV	Avian Dis	2012	2012/10/12			10.1637/9868-080111-Reg.1	Avian Dis. 2012 Sep;56(3):456-63. doi: 10.1637/9868-080111-Reg.1.
Russia & Avian	1	1	0	23283950	Influenza A (H15N4) virus isolation in Western Siberia, Russia	Sivay MV	J Virol	2013	2013/01/04	PMC3592134		10.1128/JVI.02521-12	J Virol. 2013 Mar;87(6):3578-82. doi: 10.1128/JVI.02521-12. Epub 2013 Jan 2.
Russia & Avian	1	1	0	24903874	Avian Influenza Virus with Hemagglutinin-Neuraminidase Combination H8N8, Isolated in Russia	Sivay MV	Genome Announc	2014	2014/06/07	PMC4047453		10.1128/genomeA.00545-14	Genome Announc. 2014 Jun 5;2(3):e00545-14. doi: 10.1128/genomeA.00545-14.
Russia & Wildlife	1	0		34287138	Highly Pathogenic Avian Influenza A(H5N8) Virus Clade 2.3.4.4b, Western Siberia, Russia, 2020	Sobolev I	Emerg Infect Dis	2021	2021/07/21	PMC8314819		10.3201/eid2708.204969	Emerg Infect Dis. 2021 Aug;27(8):2224-2227. doi: 10.3201/eid2708.204969.
Canada & Wildlife	1	1	0	31556839	LIMITED DETECTION OF ANTIBODIES TO CLADE 2.3.4.4 A/GOOSE/GUANGDONG/1/1996 LINEAGE HIGHLY PATHOGENIC H5 AVIAN INFLUENZA VIRUS IN NORTH AMERICAN WATERFOWL	Stallknecht DE	J Wildl Dis	2020	2019/09/27				J Wildl Dis. 2020 Jan;56(1):47-57. Epub 2019 Sep 26.
Russia & Wildlife	1	1	0	31742535	Genetic Characterization of Avian Influenza A(H5N6) Virus Clade 2.3.4.4, Russia, 2018	Susloparov IM	Emerg Infect Dis	2019	2019/11/20	PMC6874274		10.3201/eid2512.190504	Emerg Infect Dis. 2019 Dec;25(12):2338-2339. doi: 10.3201/eid2512.190504.
Russia & Wildlife	1	0		23402099	Impact of vaccines and vaccination on global control of avian influenza	Swayne DE	Avian Dis	2012	2013/02/14			10.1637/10183-041012-Review.1	Avian Dis. 2012 Dec;56(4 Suppl):818-28. doi: 10.1637/10183-041012-Review.1.
Russia & Wildlife	1	1	0	20521681	Migration of waterfowl in the East Asian flyway and spatial relationship to HPAI H5N1 outbreaks	Takekawa JY	Avian Dis	2010	2010/06/05	PMC4878034	NIHMS784795	10.1637/8914-043009-Reg.1	Avian Dis. 2010 Mar;54(1 Suppl):466-76. doi: 10.1637/8914-043009-Reg.1.
Norway & Avian	1	1	1	21241499	Virological and serological surveillance for type A influenza in the black-legged kittiwake (Rissa tridactyla)	Toennessen R	Virol J	2011	2011/01/19	PMC3032712		10.1186/1743-422X-8-21	Virol J. 2011 Jan 17;8:21. doi: 10.1186/1743-422X-8-21.
Sweden & Wildlife	1	1	0	23637797	Individual variation in influenza A virus infection histories and long-term immune responses in Mallards	Tolf C	PLoS One	2013	2013/05/03	PMC3634042		10.1371/journal.pone.0061201	PLoS One. 2013 Apr 23;8(4):e61201. doi: 10.1371/journal.pone.0061201. Print 2013.
Norway & Wildlife	1	1	0	23575317	Molecular and epidemiological characterization of avian influenza viruses from gulls and dabbling ducks in Norway	Tønnessen R	Virol J	2013	2013/04/12	PMC3639200		10.1186/1743-422X-10-112	Virol J. 2013 Apr 10;10:112. doi: 10.1186/1743-422X-10-112.
Alaska & Wildlife	1	1	1	30896365	Serologic Evidence for Influenza A Virus Exposure in Three Loon Species Breeding in Alaska, USA	Uher-Koch BD	J Wildl Dis	2019	2019/03/22				J Wildl Dis. 2019 Oct;55(4):862-867. Epub 2019 Mar 21.
Canada & Wildlife	1	0		19276440	Canadian experiences with avian influenza: a look at regional disease control--past, present, and future	Vaillancourt JP	Poult Sci	2009	2009/03/12			10.3382/ps.2008-00334	Poult Sci. 2009 Apr;88(4):885-91. doi: 10.3382/ps.2008-00334.
Sweden & Wildlife	1	0		29670093	Wild ducks excrete highly pathogenic avian influenza virus H5N8 (2014-2015) without clinical or pathological evidence of disease	van den Brand JMA	Emerg Microbes Infect	2018	2018/04/20	PMC5906613		10.1038/s41426-018-0070-9	Emerg Microbes Infect. 2018 Apr 18;7(1):67. doi: 10.1038/s41426-018-0070-9.
Sweden & Wildlife	1	0		29121508	Host and virus ecology as determinants of influenza A virus transmission in wild birds	van Dijk JG	Curr Opin Virol	2018	2017/11/10			10.1016/j.coviro.2017.10.006	Curr Opin Virol. 2018 Feb;28:26-36. doi: 10.1016/j.coviro.2017.10.006. Epub 2017 Nov 6.
Sweden & Wildlife	1	0		33361418	Host Range of Influenza A Virus H1 to H16 in Eurasian Ducks Based on Tissue and Receptor Binding Studies	Verhagen JH	J Virol	2021	2020/12/28	PMC8094940		10.1128/JVI.01873-20	J Virol. 2021 Feb 24;95(6):e01873-20. doi: 10.1128/JVI.01873-20. Print 2021 Feb 24.
Russia & Wildlife	1	1	0	29852294	Genetic features of highly pathogenic avian influenza viruses A(H5N8), isolated from the European part of the Russian Federation	Voronina OL	Infect Genet Evol	2018	2018/06/01			10.1016/j.meegid.2018.05.022	Infect Genet Evol. 2018 Sep;63:144-150. doi: 10.1016/j.meegid.2018.05.022. Epub 2018 May 28.
Sweden & Avian	1	0		22957113	Influenza A viruses: an ecology review	Wahlgren J	Infect Ecol Epidemiol	2011	2012/09/08	PMC3426330		10.3402/iee.v1i0.6004	Infect Ecol Epidemiol. 2011;1. doi: 10.3402/iee.v1i0.6004. Epub 2011 Feb 11.
Sweden & Wildlife	1	1	0	16815603	High prevalence of influenza A virus in ducks caught during spring migration through Sweden	Wallensten A	Vaccine	2006	2006/07/04			10.1016/j.vaccine.2006.05.057	Vaccine. 2006 Nov 10;24(44-46):6734-5. doi: 10.1016/j.vaccine.2006.05.057. Epub 2006 Jun 6.
Alaska & Wildlife	1	1	1	18308356	Examining the hemagglutinin subtype diversity among wild duck-origin influenza A viruses using ethanol-fixed cloacal swabs and a novel RT-PCR method	Wang R	Virology	2008	2008/03/01	PMC2397557	NIHMS50822	10.1016/j.virol.2008.01.041	Virology. 2008 May 25;375(1):182-9. doi: 10.1016/j.virol.2008.01.041. Epub 2008 Mar 4.
Polar & Wildlife	1	0		17848061	Influenza viruses in animal wildlife populations	Webby RJ	Curr Top Microbiol Immunol	2007	2007/09/13			10.1007/978-3-540-70962-6_4	Curr Top Microbiol Immunol. 2007;315:67-83. doi: 10.1007/978-3-540-70962-6_4.
Canada & Wildlife	1	0		15280485	Matrix gene of influenza a viruses isolated from wild aquatic birds: ecology and emergence of influenza a viruses	Widjaja L	J Virol	2004	2004/07/29	PMC479093		10.1128/JVI.78.16.8771-8779.2004	J Virol. 2004 Aug;78(16):8771-9. doi: 10.1128/JVI.78.16.8771-8779.2004.
Sweden & Wildlife	1	0		23725694	Frequency and patterns of reassortment in natural influenza A virus infection in a reservoir host	Wille M	Virology	2013	2013/06/04			10.1016/j.virol.2013.05.004	Virology. 2013 Aug 15;443(1):150-60. doi: 10.1016/j.virol.2013.05.004. Epub 2013 May 28.
Sweden & Wildlife	1	0		25461850	Temporal dynamics, diversity, and interplay in three components of the virodiversity of a Mallard population: influenza A virus, avian paramyxovirus and avian coronavirus	Wille M	Infect Genet Evol	2015	2014/12/03	PMC7106038		10.1016/j.meegid.2014.11.014	Infect Genet Evol. 2015 Jan;29:129-37. doi: 10.1016/j.meegid.2014.11.014. Epub 2014 Nov 21.
Sweden & Wildlife	1	1	0	28323070	Urbanization and the dynamics of RNA viruses in Mallards (Anas platyrhynchos)	Wille M	Infect Genet Evol	2017	2017/03/22	PMC7106234		10.1016/j.meegid.2017.03.019	Infect Genet Evol. 2017 Jul;51:89-97. doi: 10.1016/j.meegid.2017.03.019. Epub 2017 Mar 18.
Arctic & Wildlife	1	1	0	17553268	Movements of birds and avian influenza from Asia into Alaska	Winker K	Emerg Infect Dis	2007	2007/06/08	PMC2725966		10.3201/eid1304.061072	Emerg Infect Dis. 2007 Apr;13(4):547-52. doi: 10.3201/eid1304.061072.
Alaska & Wildlife	1	0		28202755	Low-Pathogenic Influenza A Viruses in North American Diving Ducks Contribute to the Emergence of a Novel Highly Pathogenic Influenza A(H7N8) Virus	Xu Y	J Virol	2017	2017/02/17	PMC5391441		10.1128/JVI.02208-16	J Virol. 2017 Apr 13;91(9):e02208-16. doi: 10.1128/JVI.02208-16. Print 2017 May 1.
Arctic & Wildlife	1	0		30284963	RECENT CHANGES IN INFECTIOUS DISEASES IN EUROPEAN WILDLIFE	Yon L	J Wildl Dis	2019	2018/10/05			10.7589/2017-07-172	J Wildl Dis. 2019 Jan;55(1):3-43. doi: 10.7589/2017-07-172. Epub 2018 Oct 4.
Canada & Wildlife	1	0		27852855	Potential for Low-Pathogenic Avian H7 Influenza A Viruses To Replicate and Cause Disease in a Mammalian Model	Zanin M	J Virol	2017	2016/11/18	PMC5244340		10.1128/JVI.01934-16	J Virol. 2017 Jan 18;91(3):e01934-16. doi: 10.1128/JVI.01934-16. Print 2017 Feb 1.
Circumpolar & Wildlife	1	1	1	27738169	Role for migratory wild birds in the global spread of avian influenza H5N8	Global Consortium for H5N8 and Related Influenza Viruses	Science	2016	2016/10/15	PMC5972003	EMS77545	10.1126/science.aaf8852	Science. 2016 Oct 14;354(6309):213-217. doi: 10.1126/science.aaf8852.
Alaska & Wildlife	1	1	1	N/A	SEROLOGIC EVIDENCE OF INFLUENZA VIRUS INFECTION IN A RINGED SEAL (PHOCA HISPIDA) FROM ALASKA	Danner	Marine Mammal Science	1998	N/A	N/A		10.1111/j.1748-7692.1998.tb00730.x
Iceland & Avian	1	1	1	N/A	Global dissemination of Influenza A virus is driven by wild bird migration through arctic and subarctic zones	Gass	Molecular Ecology	2022	N/A	N/A		https://www.authorea.com/doi/full/10.22541/au.164372348.88612449/v1#
Iceland & Avian	1	1	1	N/A	Transatlantic spread of highly pathogenic avian influenza H5N1 by wild birds from Europe to North America in 2021	Caliendo, V	Biorxiv	2022	N/A	N/A		https://www.biorxiv.org/content/10.1101/2022.01.13.476155v1.full.pdf
Iceland & Avian	1	1	1	N/A	The spring migration pattern of arctic birds in southwest Iceland, as recorded by radar	Gudmundsson, Gudmundur A.	Intl J Avian Sci	1993	N/A	N/A		https://doi.org/10.1111/j.1474-919X.1993.tb02828.x	IBIS. 1993. 135(2):166-176. doi: 10.1111/j.1474-919X.1993.tb02828.x
Arctic & Environment	1	1	1	N/A	Evidence and Implications of Recent Climate Change in Northern Alaska and Other Arctic Regions	Hinzman, LD	Climate change	2005	2005-10-01			10.1007/s10584-005-5352-2	Hinzman, L.D., Bettez, N.D., Bolton, W.R. et al. Evidence and Implications of Recent Climate Change in Northern Alaska and Other Arctic Regions. Climatic Change 72, 251–298 (2005).
Arctic & Environment	1	1	1	N/A	AMAP Climate Change Update 2019: An Update to Key Findings of Snow, Water, Ice and Permafrost in the Arctic	Arctic Monitoring and Assessment Programme (AMAP),	Report	2019					AMAP Climate Change Update 2019: An Update to Key Findings of Snow, Water, Ice and Permafrost in the Arctic

## Sheet: All (Duplicates Removed)
Search (All include Influenza)	Reports sought for retrieval? (0=no/1=yes)	Abstract sceen in? (0 no, 1 yes)	Narrative screen in? (0 no, 1 yes)	PMID	Title	First Author	Journal/Book	Publication Year	Create Date	PMCID	NIHMS ID	DOI	Citation
Canada & Avian	0			5301736	Antigenic variation among avian influenza A viruses	Pereira HG	Bull World Health Organ	1967	1967/01/01	PMC2554361			Bull World Health Organ. 1967;37(4):553-8.
Arctic & Environment	0			4300760	Serologic surveys of Arctic populations and some virus diseases of interest	Van Rooyen CE	Arch Environ Health	1968	1968/10/01			10.1080/00039896.1968.10665279	Arch Environ Health. 1968 Oct;17(4):547-54. doi: 10.1080/00039896.1968.10665279.
Canada & Bird	0			4299258	Evidence of infection with influenza viruses in migratory waterfowl	Easterday BC	Nature	1968	1968/08/03			10.1038/219523a0	Nature. 1968 Aug 3;219(5153):523-4. doi: 10.1038/219523a0.
Arctic & Wildlife	0			4541001	Some observations on the circulation of influenzaviruses in domestic and wild birds	Zakstel'skaja LJ	Bull World Health Organ	1972	1972/01/01	PMC2480866			Bull World Health Organ. 1972;47(4):497-501.
Russia & Avian	0			4266478	[Epizootic potential of avian influenza virus]	Siurin VN	Veterinariia	1972	1972/08/01				Veterinariia. 1972 Aug;8:41-3.
Canada & Wildlife	0			4541003	Influenza in Canada geese	Winkler WG	Bull World Health Organ	1972	1972/01/01	PMC2480860			Bull World Health Organ. 1972;47(4):507-13.
Russia & Avian	0			4789999	[Comprehensive study of the ecology of the influenza viruses on the Commander Islands]	L'vov DK	Vopr Virusol	1973	1973/11/01				Vopr Virusol. 1973 Nov-Dec;18(6):747-50.
Arctic & Wildlife	0			27387437	Detection, prevalence, and transmission of avian hematozoa in waterfowl at the Arctic/sub-Arctic interface: co-infections, viral interactions, and sources of variation	Meixell BW	Parasit Vectors	2016	2016/07/09	PMC4936110		10.1186/s13071-016-1666-3	Parasit Vectors. 2016 Jul 7;9(1):390. doi: 10.1186/s13071-016-1666-3.
Russia & Wildlife	0			144367	[Virological and serological examination of wild birds during the spring migrations in the region of the Manych Reservoir, Rostov Province]	L'vov DK	Vopr Virusol	1977	1977/07/01				Vopr Virusol. 1977 Jul-Aug;(4):409-14.
Russia & Avian	1	0		16145750	Avian influenza remains a cause for concern	Aris B	Lancet	2005	2005/09/08			10.1016/S0140-6736(05)67198-X	Lancet. 2005 Sep 3-9;366(9488):798. doi: 10.1016/S0140-6736(05)67198-X.
Russia & Wildlife	1	0		29294220	CASCIRE surveillance network and work on avian influenza viruses	Bi Y	Sci China Life Sci	2017	2018/01/03			10.1007/s11427-017-9251-2	Sci China Life Sci. 2017 Dec;60(12):1386-1391. doi: 10.1007/s11427-017-9251-2. Epub 2017 Dec 1.
Russia & Avian	1	0		16785685	Highly pathogenic avian influenza reported to be spreading into western Russia	Coulombier D	Euro Surveill	2005	2006/06/21			10.2807/esw.10.33.02776-en	Euro Surveill. 2005 Aug 18;10(8):E050818.1. doi: 10.2807/esw.10.33.02776-en.
Sweden & Avian	1	0		16794292	H5N1 avian influenza: update on the global situation	De Martin S	Euro Surveill	2005	2006/06/24			10.2807/esw.10.50.02856-en	Euro Surveill. 2005 Dec 15;10(12):E051215.1. doi: 10.2807/esw.10.50.02856-en.
Arctic & Wildlife	0			30789314	Human Seroprevalence to 11 Zoonotic Pathogens in the U.S. Arctic, Alaska	Miernyk KM	Vector Borne Zoonotic Dis	2019	2019/02/22			10.1089/vbz.2018.2390	Vector Borne Zoonotic Dis. 2019 Aug;19(8):563-575. doi: 10.1089/vbz.2018.2390. Epub 2019 Feb 21.
Arctic & Wildlife	0			25685191	Intercontinental genetic structure and gene flow in Dunlin (Calidris alpina), a potential vector of avian influenza	Miller MP	Evol Appl	2015	2015/02/17	PMC4319863		10.1111/eva.12239	Evol Appl. 2015 Feb;8(2):149-71. doi: 10.1111/eva.12239. Epub 2015 Jan 28.
Russia & Avian	1	0		17668629	Diversity of highly pathogenic avian influenza H5N1 viruses that caused epizootic in Western Siberia in 2005	Evseenko VA	Dokl Biol Sci	2007	2007/08/03			10.1134/s0012496607030179	Dokl Biol Sci. 2007 May-Jun;414:226-30. doi: 10.1134/s0012496607030179.
Arctic & Wildlife	0			26067233	Preferential Amplification of Pathogenic Sequences	Ge F	Sci Rep	2015	2015/06/13	PMC4464073		10.1038/srep11047	Sci Rep. 2015 Jun 11;5:11047. doi: 10.1038/srep11047.
Arctic & Wildlife	0			26569120	Analytical Sensitivity Comparison between Singleplex Real-Time PCR and a Multiplex PCR Platform for Detecting Respiratory Viruses	Parker J	PLoS One	2015	2015/11/17	PMC4646456		10.1371/journal.pone.0143164	PLoS One. 2015 Nov 16;10(11):e0143164. doi: 10.1371/journal.pone.0143164. eCollection 2015.
Canada & Bird	1	0		21358923	Influenza viruses in animals	Gyles C	Can Vet J	2010	2011/03/02	PMC2978982			Can Vet J. 2010 Dec;51(12):1315-8.
Arctic & Wildlife	0			29291124	Influenza A virus: sampling of the unique shorebird habitat at Delaware Bay, USA	Poulson RL	R Soc Open Sci	2017	2018/01/02	PMC5717699		10.1098/rsos.171420	R Soc Open Sci. 2017 Nov 15;4(11):171420. doi: 10.1098/rsos.171420. eCollection 2017 Nov.
Sweden & Avian	1	1	0	18598659	Avian influenza virus (H5N1) mortality surveillance	Komar N	Emerg Infect Dis	2008	2008/07/05	PMC2600356		10.3201/eid1407.080161	Emerg Infect Dis. 2008 Jul;14(7):1176-8. doi: 10.3201/eid1407.080161.
Russia & Avian	1	0		16572815	Highly pathogenic influenza virus H5N1 found in western Siberia is genetically related to viruses that circulated in Southeast Asia in 2003-2005	Onishchenko GG	Dokl Biol Sci	2006	2006/04/01			10.1134/s0012496606010170	Dokl Biol Sci. 2006 Jan-Feb;406:63-5. doi: 10.1134/s0012496606010170.
Arctic & Wildlife	0			33716412	Investigation of the 2018 thick-billed murre (Uria lomvia) die-off on St. Lawrence Island rules out food shortage as the cause	Will A	Deep Sea Res 2 Top Stud Oceanogr	2020	2021/03/15	PMC7949294	NIHMS1634761	10.1016/j.dsr2.2020.104879	Deep Sea Res 2 Top Stud Oceanogr. 2020 Dec;181-182:104879. doi: 10.1016/j.dsr2.2020.104879. Epub 2020 Sep 24.
Russia & Wildlife	1	0		20113582	Avian influenza (H5N1) outbreak among wild birds, Russia, 2009	Sharshov K	Emerg Infect Dis	2010	2010/02/02	PMC2958015		10.3201/eid1602.090974	Emerg Infect Dis. 2010 Feb;16(2):349-51. doi: 10.3201/eid1602.090974.
Russia & Avian	1	0		16845780	H5N1 Influenza Virus, Domestic Birds, Western Siberia, Russia	Shestopalov AM	Emerg Infect Dis	2006	2006/07/19	PMC3291046		10.3201/eid1207.051338	Emerg Infect Dis. 2006 Jul;12(7):1167-9. doi: 10.3201/eid1207.051338.
Arctic & Wildlife	0			27324078	Transmission of influenza reflects seasonality of wild birds across the annual cycle	Hill NJ	Ecol Lett	2016	2016/06/22			10.1111/ele.12629	Ecol Lett. 2016 Aug;19(8):915-25. doi: 10.1111/ele.12629. Epub 2016 Jun 21.
Arctic & Wildlife	0			27101787	A point mutation in the polymerase protein PB2 allows a reassortant H9N2 influenza isolate of wild-bird origin to replicate in human cells	Hussein ITM	Infect Genet Evol	2016	2016/04/23	PMC4868792	NIHMS782150	10.1016/j.meegid.2016.04.011	Infect Genet Evol. 2016 Jul;41:279-288. doi: 10.1016/j.meegid.2016.04.011. Epub 2016 Apr 14.
Arctic & Wildlife	0			33558644	Author Correction: Data mining and model-predicting a global disease reservoir for low-pathogenic Avian Influenza (AI) in the wider Pacific Rim using big data sets	Gulyaeva M	Sci Rep	2021	2021/02/09	PMC7870844		10.1038/s41598-021-83100-8	Sci Rep. 2021 Feb 8;11(1):3758. doi: 10.1038/s41598-021-83100-8.
Arctic & Avian	0			24091087	Age-specific and sex-specific morbidity and mortality from avian influenza A(H7N9)	Dudley JP	J Clin Virol	2013	2013/10/05	PMC7108379		10.1016/j.jcv.2013.09.004	J Clin Virol. 2013 Nov;58(3):568-70. doi: 10.1016/j.jcv.2013.09.004. Epub 2013 Sep 12.
Russia & Avian	1	0		34016764	Emerging H5N8 avian influenza viruses	Shi W	Science	2021	2021/05/21			10.1126/science.abg6302	Science. 2021 May 21;372(6544):784-786. doi: 10.1126/science.abg6302.
Alaska & Ice	1	0		9496967	Flu on ice	Stephenson J	JAMA	1998	1998/03/13				JAMA. 1998 Mar 4;279(9):644.
Norway & Seals	1	1	1	8073595	Serological investigation of virus infections in harp seals (Phoca groenlandica) and hooded seals (Cystophora cristata)	Stuen S	Vet Rec	1994	1994/05/07			10.1136/vr.134.19.502	Vet Rec. 1994 May 7;134(19):502-3. doi: 10.1136/vr.134.19.502.
Arctic & Avian	0			10713598	Influenza A pandemics of the 20th century with special reference to 1918: virology, pathology and epidemiology	Oxford JS	Rev Med Virol	2000	2000/03/14			10.1002/(sici)1099-1654(200003/04)10:2<119::aid-rmv272>3.0.co;2-o	Rev Med Virol. 2000 Mar-Apr;10(2):119-33. doi: 10.1002/(sici)1099-1654(200003/04)10:2<119::aid-rmv272>3.0.co;2-o.
Norway & Wildlife	1	0		30976905	Experimental infections of Norway rats with avian-derived low-pathogenic influenza A viruses	VanDalen KK	Arch Virol	2019	2019/04/13			10.1007/s00705-019-04225-w	Arch Virol. 2019 Jul;164(7):1831-1836. doi: 10.1007/s00705-019-04225-w. Epub 2019 Apr 11.
Arctic & Avian	0			33872350	Health Surveillance of Penguins in the Barton Peninsula on King George Island, Antarctica	Park JH	J Wildl Dis	2021	2021/04/19			10.7589/2019-10-257	J Wildl Dis. 2021 Jul 1;57(3):612-617. doi: 10.7589/2019-10-257.
Arctic & Avian	0			19557615	The toxic effects of multiple persistent organic pollutant exposures on the post-hatch immunity maturation of glaucous gulls	Sagerup K	J Toxicol Environ Health A	2009	2009/06/27			10.1080/15287390902959516	J Toxicol Environ Health A. 2009;72(14):870-83. doi: 10.1080/15287390902959516.
Russia & Avian	1	0		16127128	H5N1 avian influenza virus expands its range		Vet Rec	2005	2005/08/30			10.1136/vr.157.9.242	Vet Rec. 2005 Aug 27;157(9):242-3. doi: 10.1136/vr.157.9.242.
Arctic & Marine Mammals	0			33130165	Covid-19 pandemic in the lens of food safety and security	Ma NL	Environ Res	2021	2020/11/01	PMC7598367		10.1016/j.envres.2020.110405	Environ Res. 2021 Feb;193:110405. doi: 10.1016/j.envres.2020.110405. Epub 2020 Oct 29.
Arctic & Marine Mammals	0			20832100	Trans-generational and neonatal humoral immune responses in West Greenland sledge dogs (Canis familiaris) exposed to organohalogenated environmental contaminants	Sonne C	Sci Total Environ	2010	2010/09/14			10.1016/j.scitotenv.2010.07.076	Sci Total Environ. 2010 Nov 1;408(23):5801-7. doi: 10.1016/j.scitotenv.2010.07.076. Epub 2010 Sep 15.
Russia & Avian	1	0		16785680	Highly pathogenic avian influenza reported in Russian bird populations	No author	Euro Surveill	2005	2006/06/21				Euro Surveill. 2005 Aug 11;10(8):E050811.2.
Greenland & Avian	1	1	0	16842932	Greenland as a plausible springboard for trans-Atlantic avian influenza spread	Shoham D	Med Hypotheses	2006	2006/07/18			10.1016/j.mehy.2006.05.039	Med Hypotheses. 2006;67(6):1460-1. doi: 10.1016/j.mehy.2006.05.039. Epub 2006 Jul 13.
Canada & Wildlife	1	1	0	17126960	An overview of the epidemiology of avian influenza	Alexander DJ	Vaccine	2007	2006/11/28			10.1016/j.vaccine.2006.10.051	Vaccine. 2007 Jul 26;25(30):5637-44. doi: 10.1016/j.vaccine.2006.10.051. Epub 2006 Nov 9.
Arctic & Ice	0			31996416	Role of Horizontal Gene Transfer in the Development of Multidrug Resistance in Haemophilus influenzae	Hegstad K	mSphere	2020	2020/01/31	PMC6992377		10.1128/mSphere.00969-19	mSphere. 2020 Jan 29;5(1):e00969-19. doi: 10.1128/mSphere.00969-19.
Arctic & Environment	0			32334281	Respiratory syncytial virus and influenza hospitalizations in Alaska native adults	Nolen LD	J Clin Virol	2020	2020/04/26			10.1016/j.jcv.2020.104347	J Clin Virol. 2020 Jun;127:104347. doi: 10.1016/j.jcv.2020.104347. Epub 2020 Apr 18.
Arctic & Environment	0			22472012	A community-based participatory approach and engagement process creates culturally appropriate and community informed pandemic plans after the 2009 H1N1 influenza pandemic: remote and isolated First Nations communities of sub-arctic Ontario, Canada	Charania NA	BMC Public Health	2012	2012/04/05	PMC3434059		10.1186/1471-2458-12-268	BMC Public Health. 2012 Apr 3;12:268. doi: 10.1186/1471-2458-12-268.
Sweden & Avian	1	1	0	26998334	Does influenza A virus infection affect movement behaviour during stopover in its wild reservoir host?	Bengtsson D	R Soc Open Sci	2016	2016/03/22	PMC4785985		10.1098/rsos.150633	R Soc Open Sci. 2016 Feb 10;3(2):150633. doi: 10.1098/rsos.150633. eCollection 2016 Feb.
Russia & Avian	1	1	0	8310117	Unravelling the ecology of influenza A virus	Beveridge WI	Hist Philos Life Sci	1993	1993/01/01				Hist Philos Life Sci. 1993;15(1):23-32.
Arctic & Environment	0			32058938	Community water service and incidence of respiratory, skin, and gastrointestinal infections in rural Alaska, 2013-2015	Mosites E	Int J Hyg Environ Health	2020	2020/02/15			10.1016/j.ijheh.2020.113475	Int J Hyg Environ Health. 2020 Apr;225:113475. doi: 10.1016/j.ijheh.2020.113475. Epub 2020 Feb 12.
Arctic & Environment	0			10525828	A hypothesis concerning deficiency of sunlight, cold temperature, and influenza epidemics associated with the onset of acute lymphoblastic leukemia in northern Finland	Timonen TT	Ann Hematol	1999	1999/10/20			10.1007/s002770050539	Ann Hematol. 1999 Sep;78(9):408-14. doi: 10.1007/s002770050539.
Arctic & Environment	0			33345895	Did anomalous atmospheric circulation favor the spread of COVID-19 in Europe?	Sanchez-Lorenzo A	Environ Res	2021	2020/12/21	PMC7746124		10.1016/j.envres.2020.110626	Environ Res. 2021 Mar;194:110626. doi: 10.1016/j.envres.2020.110626. Epub 2020 Dec 17.
Russia & Wildlife	1	1	0	27405930	Highly pathogenic avian influenza H5N1 Clade 2.3.2.1c virus in migratory birds, 2014-2015	Bi Y	Virol Sin	2016	2016/07/14	PMC8193437		10.1007/s12250-016-3750-4	Virol Sin. 2016 Aug;31(4):300-5. doi: 10.1007/s12250-016-3750-4. Epub 2016 Jul 7.
Arctic & Environment	0			30646892	Knowledge of antibiotics and antibiotic resistance among Norwegian pharmacy customers - a cross-sectional study	Waaseth M	BMC Public Health	2019	2019/01/17	PMC6332570		10.1186/s12889-019-6409-x	BMC Public Health. 2019 Jan 15;19(1):66. doi: 10.1186/s12889-019-6409-x.
Arctic & Environment	0			32589699	Epidemiology of Invasive Haemophilus influenzae Serotype a Disease-United States, 2008-2017	Soeters HM	Clin Infect Dis	2021	2020/06/27			10.1093/cid/ciaa875	Clin Infect Dis. 2021 Jul 15;73(2):e371-e379. doi: 10.1093/cid/ciaa875.
Arctic & Environment	0			18382002	The relationship between in-home water service and the risk of respiratory tract, skin, and gastrointestinal tract infections among rural Alaska natives	Hennessy TW	Am J Public Health	2008	2008/04/03	PMC2636427		10.2105/AJPH.2007.115618	Am J Public Health. 2008 Nov;98(11):2072-8. doi: 10.2105/AJPH.2007.115618. Epub 2008 Apr 1.
Arctic & Environment	0			5682260	Influenza in isolated communities	von Magnus P	Arch Environ Health	1968	1968/10/01			10.1080/00039896.1968.10665277	Arch Environ Health. 1968 Oct;17(4):537-42. doi: 10.1080/00039896.1968.10665277.
Arctic & Environment	0			4300759	Respiratory virus infections other than influenza	Gard S	Arch Environ Health	1968	1968/10/01			10.1080/00039896.1968.10665278	Arch Environ Health. 1968 Oct;17(4):543-6. doi: 10.1080/00039896.1968.10665278.
Arctic & Environment	0			3048291	The east Greenlanders' own traditions to social care for widows and children	Helms S	Arctic Med Res	1988	1988/07/01				Arctic Med Res. 1988 Jul;47(3):136-43.
Sweden & Wildlife	1	1	0	26819311	Spatiotemporal Analysis of the Genetic Diversity of Seal Influenza A(H10N7) Virus, Northwestern Europe	Bodewes R	J Virol	2016	2016/01/29	PMC4836327		10.1128/JVI.03046-15	J Virol. 2016 Apr 14;90(9):4269-4277. doi: 10.1128/JVI.03046-15. Print 2016 May.
Canada & Wildlife	1	1	0	30552753	Probable reverse zoonosis of influenza A(H1N1)pdm 09 in a striped skunk (Mephitis mephitis)	Britton AP	Zoonoses Public Health	2019	2018/12/16			10.1111/zph.12553	Zoonoses Public Health. 2019 Jun;66(4):422-427. doi: 10.1111/zph.12553. Epub 2018 Dec 14.
Sweden & Wildlife	1	1	0	26441012	Pathogenicity and tissue tropism of currently circulating highly pathogenic avian influenza A virus (H5N1; clade 2.3.2) in tufted ducks (Aythya fuligula)	Bröjer C	Vet Microbiol	2015	2015/10/07			10.1016/j.vetmic.2015.09.011	Vet Microbiol. 2015 Nov 18;180(3-4):273-80. doi: 10.1016/j.vetmic.2015.09.011. Epub 2015 Sep 25.
Subarctic & Environment	0			22030007	The 2009 H1N1 pandemic response in remote First Nation communities of Subarctic Ontario: barriers and improvements from a health care services perspective	Charania NA	Int J Circumpolar Health	2011	2011/10/28			10.3402/ijch.v70i5.17849	Int J Circumpolar Health. 2011;70(5):564-75. doi: 10.3402/ijch.v70i5.17849. Epub 2011 Oct 26.
Alaska & Wildlife	1	1	1	11838234	Viral and bacterial serology of free-ranging Pacific walrus	Calle PP	J Wildl Dis	2002	2002/02/13			10.7589/0090-3558-38.1.93	J Wildl Dis. 2002 Jan;38(1):93-100. doi: 10.7589/0090-3558-38.1.93.
Alaska & Wildlife	1	1	1	18269325	Ecology of avian influenza virus in birds	Causey D	J Infect Dis	2008	2008/03/28	PMC7110149		10.1086/524991	J Infect Dis. 2008 Feb 15;197 Suppl 1(Suppl 1):S29-33. doi: 10.1086/524991.
Circumpolar & Climate Change	0			12546188	Winter mortality and its causes	Keatinge WR	Int J Circumpolar Health	2002	2003/01/28			10.3402/ijch.v61i4.17477	Int J Circumpolar Health. 2002 Nov;61(4):292-9. doi: 10.3402/ijch.v61i4.17477.
Canada & Wildlife	1	1	1	33635994	A SYSTEMATIC REVIEW AND NARRATIVE SYNTHESIS OF THE USE OF ENVIRONMENTAL SAMPLES FOR THE SURVEILLANCE OF AVIAN INFLUENZA VIRUSES IN WILD WATERBIRDS	Coombe M	J Wildl Dis	2021	2021/02/26			10.7589/JWD-D-20-00082	J Wildl Dis. 2021 Jan 6;57(1):1-18. doi: 10.7589/JWD-D-20-00082.
Polar & Wildlife	0			21358279	The influenza virus RNA synthesis machine: advances in its structure and function	Resa-Infante P	RNA Biol	2011	2011/03/02	PMC3127100		10.4161/rna.8.2.14513	RNA Biol. 2011 Mar-Apr;8(2):207-15. doi: 10.4161/rna.8.2.14513. Epub 2011 Mar 1.
Polar & Wildlife	0			19494257	IL-10 deficiency unleashes an influenza-specific Th17 response and enhances survival against high-dose challenge	McKinstry KK	J Immunol	2009	2009/06/05	PMC2724021	NIHMS111718	10.4049/jimmunol.0900657	J Immunol. 2009 Jun 15;182(12):7353-63. doi: 10.4049/jimmunol.0900657.
Polar & Wildlife	0			31118253	Cholesterol Binding to the Transmembrane Region of a Group 2 Hemagglutinin (HA) of Influenza Virus Is Essential for Virus Replication, Affecting both Virus Assembly and HA Fusion Activity	Hu B	J Virol	2019	2019/05/24	PMC6639284		10.1128/JVI.00555-19	J Virol. 2019 Jul 17;93(15):e00555-19. doi: 10.1128/JVI.00555-19. Print 2019 Aug 1.
Polar & Wildlife	0			29102516	Colocalization of intracellular specific IgA (icIgA) with influenza virus in patients' nasopharyngeal aspirate cells	Kok TW	J Virol Methods	2018	2017/11/06			10.1016/j.jviromet.2017.10.022	J Virol Methods. 2018 Feb;252:8-14. doi: 10.1016/j.jviromet.2017.10.022. Epub 2017 Nov 2.
Polar & Wildlife	0			21966467	Increased MDSC accumulation and Th2 biased response to influenza A virus infection in the absence of TLR7 in mice	Jeisy-Scott V	PLoS One	2011	2011/10/04	PMC3179470		10.1371/journal.pone.0025242	PLoS One. 2011;6(9):e25242. doi: 10.1371/journal.pone.0025242. Epub 2011 Sep 23.
Polar & Wildlife	0			30158290	Influenza A Virus M2 Protein Apical Targeting Is Required for Efficient Virus Replication	Wohlgemuth N	J Virol	2018	2018/08/31	PMC6206479		10.1128/JVI.01425-18	J Virol. 2018 Oct 29;92(22):e01425-18. doi: 10.1128/JVI.01425-18. Print 2018 Nov 15.
Polar & Wildlife	0			21905667	Enhancing the intestinal membrane permeability of zanamivir: a carrier mediated prodrug approach	Gupta SV	Mol Pharm	2011	2011/09/13	PMC3304100	NIHMS326778	10.1021/mp200291x	Mol Pharm. 2011 Dec 5;8(6):2358-67. doi: 10.1021/mp200291x. Epub 2011 Sep 22.
Polar & Wildlife	0			28080908	ANTIDOG IgG SECONDARY ANTIBODY SUCCESSFULLY DETECTS IgG IN A VARIETY OF AQUATIC MAMMALS	Roehl K	J Zoo Wildl Med	2016	2017/01/13			10.1638/2015-0179.1	J Zoo Wildl Med. 2016 Dec;47(4):970-976. doi: 10.1638/2015-0179.1.
Polar & Wildlife	0			26718097	The modA10 phasevarion of nontypeable Haemophilus influenzae R2866 regulates multiple virulence-associated traits	VanWagoner TM	Microb Pathog	2016	2016/01/01	PMC4769924	NIHMS751452	10.1016/j.micpath.2015.12.006	Microb Pathog. 2016 Mar;92:60-67. doi: 10.1016/j.micpath.2015.12.006. Epub 2015 Dec 21.
Polar & Wildlife	0			29274410	CD151, a novel host factor of nuclear export signaling in influenza virus infection	Qiao Y	J Allergy Clin Immunol	2018	2017/12/24			10.1016/j.jaci.2017.11.032	J Allergy Clin Immunol. 2018 May;141(5):1799-1817. doi: 10.1016/j.jaci.2017.11.032. Epub 2017 Dec 21.
Polar & Wildlife	0			27333291	Chemical Modification of Influenza CD8+ T-Cell Epitopes Enhances Their Immunogenicity Regardless of Immunodominance	Rosendahl Huber SK	PLoS One	2016	2016/06/23	PMC4917206		10.1371/journal.pone.0156462	PLoS One. 2016 Jun 22;11(6):e0156462. doi: 10.1371/journal.pone.0156462. eCollection 2016.
Polar & Wildlife	0			23684847	Comparison of initial feasibility of host cell lines for viral vaccine production	Vlecken DH	J Virol Methods	2013	2013/05/21			10.1016/j.jviromet.2013.04.020	J Virol Methods. 2013 Oct;193(1):28-41. doi: 10.1016/j.jviromet.2013.04.020. Epub 2013 May 14.
Polar & Wildlife	0			11003589	Evidence against the acidification hypothesis in cystic fibrosis	Gibson GA	Am J Physiol Cell Physiol	2000	2000/09/26			10.1152/ajpcell.2000.279.4.C1088	Am J Physiol Cell Physiol. 2000 Oct;279(4):C1088-99. doi: 10.1152/ajpcell.2000.279.4.C1088.
Polar & Wildlife	0			27330052	Shp2 Deficiency Impairs the Inflammatory Response Against Haemophilus influenzae by Regulating Macrophage Polarization	Zhao L	J Infect Dis	2016	2016/06/23			10.1093/infdis/jiw205	J Infect Dis. 2016 Aug 15;214(4):625-33. doi: 10.1093/infdis/jiw205. Epub 2016 May 24.
Polar & Wildlife	0			17634290	A unique element in the cytoplasmic tail of the type II transforming growth factor-beta receptor controls basolateral delivery	Murphy SJ	Mol Biol Cell	2007	2007/07/20	PMC1995729		10.1091/mbc.e06-10-0930	Mol Biol Cell. 2007 Oct;18(10):3788-99. doi: 10.1091/mbc.e06-10-0930. Epub 2007 Jul 18.
Polar & Wildlife	0			2879845	Microtubule-acting drugs lead to the nonpolarized delivery of the influenza hemagglutinin to the cell surface of polarized Madin-Darby canine kidney cells	Rindler MJ	J Cell Biol	1987	1987/02/01	PMC2114410		10.1083/jcb.104.2.231	J Cell Biol. 1987 Feb;104(2):231-41. doi: 10.1083/jcb.104.2.231.
Polar & Wildlife	0			6275120	Delayed appearance of pseudotypes between vesicular stomatitis virus influenza virus during mixed infection of MDCK cells	Roth MG	J Virol	1981	1981/12/01	PMC256696		10.1128/JVI.40.3.848-860.1981	J Virol. 1981 Dec;40(3):848-60. doi: 10.1128/JVI.40.3.848-860.1981.
Polar & Wildlife	0			12504548	Influenza A virus hemagglutinin containing basolateral localization signal does not alter the apical budding of a recombinant influenza A virus in polarized MDCK cells	Barman S	Virology	2003	2002/12/31			10.1006/viro.2002.1731	Virology. 2003 Jan 5;305(1):138-52. doi: 10.1006/viro.2002.1731.
Polar & Wildlife	0			18408016	Identification of the pore-lining residues of the BM2 ion channel protein of influenza B virus	Ma C	J Biol Chem	2008	2008/04/15	PMC2414288		10.1074/jbc.M710302200	J Biol Chem. 2008 Jun 6;283(23):15921-31. doi: 10.1074/jbc.M710302200. Epub 2008 Apr 11.
Polar & Wildlife	0			9875317	Phosphorylation of the M2 protein of influenza A virus is not essential for virus viability	Thomas JM	Virology	1998	1999/01/06			10.1006/viro.1998.9384	Virology. 1998 Dec 5;252(1):54-64. doi: 10.1006/viro.1998.9384.
Polar & Wildlife	0			8978827	Identification of a cytoplasmic domain important in the polarized expression and clustering of the Kv2.1 K+ channel	Scannevin RH	J Cell Biol	1996	1996/12/01	PMC2133974		10.1083/jcb.135.6.1619	J Cell Biol. 1996 Dec;135(6 Pt 1):1619-32. doi: 10.1083/jcb.135.6.1619.
Polar & Wildlife	0			8609159	Different biosynthetic transport routes to the plasma membrane in BHK and CHO cells	Yoshimori T	J Cell Biol	1996	1996/04/01	PMC2120802		10.1083/jcb.133.2.247	J Cell Biol. 1996 Apr;133(2):247-56. doi: 10.1083/jcb.133.2.247.
Polar & Wildlife	0			1651590	Pneumotropic revertants derived from a pantropic mutant, F1-R, of Sendai virus	Tashiro M	Virology	1991	1991/09/01			10.1016/0042-6822(91)90839-4	Virology. 1991 Sep;184(1):227-34. doi: 10.1016/0042-6822(91)90839-4.
Polar & Wildlife	0			12039521	Influence of histidine beta81 of HLA-DR101 on peptide binding and presentation to T-cell receptor	Figueredo Dos Santos C	Hum Immunol	2002	2002/06/01			10.1016/s0198-8859(02)00394-4	Hum Immunol. 2002 Jun;63(6):459-66. doi: 10.1016/s0198-8859(02)00394-4.
Polar & Wildlife	0			9692956	Critical interactions in binding antibody NC41 to influenza N9 neuraminidase: amino acid contacts on the antibody heavy chain	Pruett PS	Biochemistry	1998	1998/08/07			10.1021/bi9802059	Biochemistry. 1998 Jul 28;37(30):10660-70. doi: 10.1021/bi9802059.
Polar & Wildlife	0			8858170	Rab8 promotes polarized membrane transport through reorganization of actin and microtubules in fibroblasts	Peränen J	J Cell Biol	1996	1996/10/01	PMC2121014		10.1083/jcb.135.1.153	J Cell Biol. 1996 Oct;135(1):153-67. doi: 10.1083/jcb.135.1.153.
Polar & Wildlife	0			8654387	In vitro binding of clathrin adaptors to sorting signals correlates with endocytosis and basolateral sorting	Heilker R	EMBO J	1996	1996/06/03	PMC450227			EMBO J. 1996 Jun 3;15(11):2893-9.
Polar & Wildlife	0			11704666	Multiple roles for phosphatidylinositol 4-kinase in biosynthetic transport in polarized Madin-Darby canine kidney cells	Bruns JR	J Biol Chem	2002	2001/11/13			10.1074/jbc.M108571200	J Biol Chem. 2002 Jan 18;277(3):2012-8. doi: 10.1074/jbc.M108571200. Epub 2001 Nov 9.
Polar & Wildlife	0			3546337	The large external domain is sufficient for the correct sorting of secreted or chimeric influenza virus hemagglutinins in polarized monkey kidney cells	Roth MG	J Cell Biol	1987	1987/03/01	PMC2114565		10.1083/jcb.104.3.769	J Cell Biol. 1987 Mar;104(3):769-82. doi: 10.1083/jcb.104.3.769.
Polar & Wildlife	0			10807936	Involvement of the proximal C terminus of the AMPA receptor subunit GluR1 in dendritic sorting	Ruberti F	J Neurosci	2000	2000/05/16	PMC6772647		10.1523/JNEUROSCI.20-11-j0002.2000	J Neurosci. 2000 Jun 1;20(11):RC78. doi: 10.1523/JNEUROSCI.20-11-j0002.2000.
Polar & Wildlife	0			2163770	Polarized sorting of viral glycoproteins to the axon and dendrites of hippocampal neurons in culture	Dotti CG	Cell	1990	1990/07/13			10.1016/0092-8674(90)90240-f	Cell. 1990 Jul 13;62(1):63-72. doi: 10.1016/0092-8674(90)90240-f.
Polar & Wildlife	0			2460997	Amino acid substitution at position 226 of the hemagglutinin molecule of influenza (H1N1) virus affects receptor binding activity but not fusion activity	Nobusawa E	Virology	1988	1988/11/01			10.1016/0042-6822(88)90048-7	Virology. 1988 Nov;167(1):8-14. doi: 10.1016/0042-6822(88)90048-7.
Polar & Wildlife	0			10452991	Polarized transport of MHC class II molecules in Madin-Darby canine kidney cells is directed by a leucine-based signal in the cytoplasmic tail of the beta-chain	Simonsen A	J Immunol	1999	1999/08/24				J Immunol. 1999 Sep 1;163(5):2540-8.
Polar & Wildlife	0			10734069	Basolateral sorting signals differ in their ability to redirect apical proteins to the basolateral cell surface	Renold A	J Biol Chem	2000	2000/03/29			10.1074/jbc.275.13.9290	J Biol Chem. 2000 Mar 31;275(13):9290-5. doi: 10.1074/jbc.275.13.9290.
Polar & Wildlife	0			9660862	Mutations in the middle of the transmembrane domain reverse the polarity of transport of the influenza virus hemagglutinin in MDCK epithelial cells	Lin S	J Cell Biol	1998	1998/07/14	PMC2133032		10.1083/jcb.142.1.51	J Cell Biol. 1998 Jul 13;142(1):51-7. doi: 10.1083/jcb.142.1.51.
Polar & Avian	0			23842497	Pathogenesis and transmission of avian influenza A (H7N9) virus in ferrets and mice	Belser JA	Nature	2013	2013/07/12	PMC7094885		10.1038/nature12391	Nature. 2013 Sep 26;501(7468):556-9. doi: 10.1038/nature12391. Epub 2013 Jul 10.
Polar & Avian	0			29577197	Signal Immune Reactions of Macrophages Differentiated from THP-1 Monocytes to Infection with Pandemic H1N1PDM09 Virus and H5N2 and H9N2 Avian Influenza A Virus	Sokolova TM	Bull Exp Biol Med	2018	2018/03/27			10.1007/s10517-018-4048-3	Bull Exp Biol Med. 2018 Mar;164(5):636-640. doi: 10.1007/s10517-018-4048-3. Epub 2018 Mar 26.
Polar & Avian	0			32322135	Rapid detection of anti-H5 avian influenza virus antibody by fluorescence polarization immunoassay using a portable fluorescence polarization analyzer	Nishiyama K	Sens Actuators B Chem	2020	2020/04/24	PMC7172727		10.1016/j.snb.2020.128160	Sens Actuators B Chem. 2020 Aug 1;316:128160. doi: 10.1016/j.snb.2020.128160. Epub 2020 Apr 21.
Polar & Avian	0			23775183	Replication and pathogenesis of avian influenza A (H5N1) virus infection in polarised human bronchial and alveolar epithelium	Chan MC	Hong Kong Med J	2013	2013/06/19				Hong Kong Med J. 2013 Jun;19 Suppl 4:24-8.
Polar & Avian	0			21049953	Role of the key mutation in the selective binding of avian and human influenza hemagglutinin to sialosides revealed by quantum-mechanical calculations	Sawada T	J Am Chem Soc	2010	2010/11/06			10.1021/ja105051e	J Am Chem Soc. 2010 Dec 1;132(47):16862-72. doi: 10.1021/ja105051e. Epub 2010 Nov 4.
Polar & Avian	0			21849460	The avian influenza virus NS1 ESEV PDZ binding motif associates with Dlg1 and Scribble to disrupt cellular tight junctions	Golebiewski L	J Virol	2011	2011/08/19	PMC3187509		10.1128/JVI.05070-11	J Virol. 2011 Oct;85(20):10639-48. doi: 10.1128/JVI.05070-11. Epub 2011 Aug 17.
Polar & Avian	0			32845931	Prion protein signaling induces M2 macrophage polarization and protects from lethal influenza infection in mice	Chida J	PLoS Pathog	2020	2020/08/27	PMC7489546		10.1371/journal.ppat.1008823	PLoS Pathog. 2020 Aug 26;16(8):e1008823. doi: 10.1371/journal.ppat.1008823. eCollection 2020 Aug.
Polar & Avian	0			33025860	A fluorescence polarization immunoassay for the rapid detection of antibody against influenza A virus in chicken and goat sera	Takeda Y	J Vet Diagn Invest	2020	2020/10/07	PMC7649541		10.1177/1040638720960046	J Vet Diagn Invest. 2020 Nov;32(6):887-891. doi: 10.1177/1040638720960046. Epub 2020 Oct 7.
Polar & Avian	0			29035344	A Phase-Intensity Surface Plasmon Resonance Biosensor for Avian Influenza A (H5N1) Detection	Wong CL	Sensors (Basel)	2017	2017/10/17	PMC5677386		10.3390/s17102363	Sensors (Basel). 2017 Oct 16;17(10):2363. doi: 10.3390/s17102363.
Polar & Avian	0			19874627	Influenza H5N1 virus infection of polarized human alveolar epithelial cells and lung microvascular endothelial cells	Chan MC	Respir Res	2009	2009/10/31	PMC2780994		10.1186/1465-9921-10-102	Respir Res. 2009 Oct 30;10(1):102. doi: 10.1186/1465-9921-10-102.
Polar & Avian	0			30173758	Dendritic cell-targeted recombinantLactobacilli induce DC activation and elicit specific immune responses against G57 genotype of avian H9N2 influenza virus infection	Sun Y	Vet Microbiol	2018	2018/09/04			10.1016/j.vetmic.2018.07.009	Vet Microbiol. 2018 Sep;223:9-20. doi: 10.1016/j.vetmic.2018.07.009. Epub 2018 Jul 17.
Polar & Avian	0			16113814	Infection of the endothelium by influenza viruses	Klenk HD	Thromb Haemost	2005	2005/08/23			10.1160/TH05-04-0264	Thromb Haemost. 2005 Aug;94(2):262-5. doi: 10.1160/TH05-04-0264.
Polar & Avian	0			17855549	Highly pathogenic avian influenza H5N1 viruses elicit an attenuated type i interferon response in polarized human bronchial epithelial cells	Zeng H	J Virol	2007	2007/09/15	PMC2169033		10.1128/JVI.01134-07	J Virol. 2007 Nov;81(22):12439-49. doi: 10.1128/JVI.01134-07. Epub 2007 Sep 12.
Polar & Avian	0			16397505	Influenza M2 envelope protein augments avian influenza hemagglutinin pseudotyping of lentiviral vectors	McKay T	Gene Ther	2006	2006/01/07			10.1038/sj.gt.3302715	Gene Ther. 2006 Apr;13(8):715-24. doi: 10.1038/sj.gt.3302715.
Polar & Avian	0			25966397	Online solid phase extraction liquid chromatography using bonded zwitterionic stationary phases and tandem mass spectrometry for rapid environmental trace analysis of highly polar hydrophilic compounds - Application for the antiviral drug Zanamivir	Lindberg RH	Talanta	2015	2015/05/13			10.1016/j.talanta.2015.03.066	Talanta. 2015 Aug 15;141:164-9. doi: 10.1016/j.talanta.2015.03.066. Epub 2015 Apr 8.
Polar & Avian	0			8552677	Interactions of protein antigens with antibodies	Davies DR	Proc Natl Acad Sci U S A	1996	1996/01/09	PMC40169		10.1073/pnas.93.1.7	Proc Natl Acad Sci U S A. 1996 Jan 9;93(1):7-12. doi: 10.1073/pnas.93.1.7.
Polar & Avian	0			10933711	Targeted infection of endothelial cells by avian influenza virus A/FPV/Rostock/34 (H7N1) in chicken embryos	Feldmann A	J Virol	2000	2000/08/10	PMC112334		10.1128/jvi.74.17.8018-8027.2000	J Virol. 2000 Sep;74(17):8018-27. doi: 10.1128/jvi.74.17.8018-8027.2000.
Polar & Avian	0			22072765	Human pulmonary microvascular endothelial cells support productive replication of highly pathogenic avian influenza viruses: possible involvement in the pathogenesis of human H5N1 virus infection	Zeng H	J Virol	2012	2011/11/11	PMC3255832		10.1128/JVI.06348-11	J Virol. 2012 Jan;86(2):667-78. doi: 10.1128/JVI.06348-11. Epub 2011 Nov 9.
Polar & Avian	0			21148495	Infection with highly pathogenic H7 influenza viruses results in an attenuated proinflammatory cytokine and chemokine response early after infection	Belser JA	J Infect Dis	2011	2010/12/15	PMC3086437		10.1093/infdis/jiq018	J Infect Dis. 2011 Jan 1;203(1):40-8. doi: 10.1093/infdis/jiq018.
Polar & Avian	0			25653711	Replication and innate host response of influenza A virus in lung microvascular endothelial cells: new insights into systemic infection and pathogenesis	Li AC	Influenza Other Respir Viruses	2011	2015/02/06	PMC4313889	NIHMS315573		Influenza Other Respir Viruses. 2011 May;5(Suppl 1):287-288.
Polar & Avian	0			27908830	Protective efficacy of Fc targeting conserved influenza virus M2e antigen expressed by Lactobacillus plantarum	Yang WT	Antiviral Res	2017	2016/12/03			10.1016/j.antiviral.2016.11.025	Antiviral Res. 2017 Feb;138:9-21. doi: 10.1016/j.antiviral.2016.11.025. Epub 2016 Nov 29.
Polar & Avian	0			16922680	In silico analysis of genes nucleoprotein, neuraminidase and hemagglutinin: a comparative study on different strains of influenza A (Bird flu) virus sub-type H5N1	Anwar T	In Silico Biol	2006	2006/08/23				In Silico Biol. 2006;6(3):161-8.
Polar & Avian	0			34613971	Comprehensive analysis of lectin-glycan interactions reveals determinants of lectin specificity	Mattox DE	PLoS Comput Biol	2021	2021/10/06			10.1371/journal.pcbi.1009470	PLoS Comput Biol. 2021 Oct 6;17(10):e1009470. doi: 10.1371/journal.pcbi.1009470. Online ahead of print.
Polar & Avian	0			7425854	Cleavability of hemagglutinin determines spread of avian influenza viruses in the chorioallantoic membrane of chicken embryo	Rott R	Arch Virol	1980	1980/01/01			10.1007/BF01317323	Arch Virol. 1980;65(2):123-33. doi: 10.1007/BF01317323.
Polar & Avian	0			23358889	IFITM proteins restrict viral membrane hemifusion	Li K	PLoS Pathog	2013	2013/01/30	PMC3554583		10.1371/journal.ppat.1003124	PLoS Pathog. 2013 Jan;9(1):e1003124. doi: 10.1371/journal.ppat.1003124. Epub 2013 Jan 24.
Russia & Wildlife	1	1	0	24972026	Virological evaluation of avian influenza virus persistence in natural and anthropic ecosystems of Western Siberia (Novosibirsk Region, summer 2012)	De Marco MA	PLoS One	2014	2014/06/28	PMC4074073		10.1371/journal.pone.0100859	PLoS One. 2014 Jun 27;9(6):e100859. doi: 10.1371/journal.pone.0100859. eCollection 2014.
Polar & Avian	0			7571401	Inhibition of replication of avian influenza viruses by the neuraminidase inhibitor 4-guanidino-2,4-dideoxy-2,3-dehydro-N-acetylneuraminic acid	Gubareva LV	Virology	1995	1995/10/01			10.1006/viro.1995.1489	Virology. 1995 Oct 1;212(2):323-30. doi: 10.1006/viro.1995.1489.
Polar & Avian	0			20455463	[Integration of influenza A virus NSP gene into baculovirus genome and its expression in insect cells]	Zhirnov OP	Vopr Virusol	2010	2010/05/12				Vopr Virusol. 2010 Mar-Apr;55(2):4-8.
Polar & Avian	0			19216739	The role of RNA folding free energy in the evolution of the polymerase genes of the influenza A virus	Brower-Sinning R	Genome Biol	2009	2009/02/17	PMC2688270		10.1186/gb-2009-10-2-r18	Genome Biol. 2009 Feb 12;10(2):R18. doi: 10.1186/gb-2009-10-2-r18.
Polar & Avian	0			20860351	Selective binding of antiinfluenza drugs and their analogues to 'open' and 'closed' conformations of H5N1 neuraminidase	Wang P	J Phys Chem B	2010	2010/09/24			10.1021/jp1030224	J Phys Chem B. 2010 Oct 14;114(40):12958-64. doi: 10.1021/jp1030224.
Polar & Avian	0			19474208	Rapid pulmonary fibrosis induced by acute lung injury via a lipopolysaccharide three-hit regimen	Li H	Innate Immun	2009	2009/05/29			10.1177/1753425908101509	Innate Immun. 2009 Jun;15(3):143-54. doi: 10.1177/1753425908101509.
Polar & Avian	0			10662775	Influenza M2 proton channel activity selectively inhibits trans-Golgi network release of apical membrane and secreted proteins in polarized Madin-Darby canine kidney cells	Henkel JR	J Cell Biol	2000	2000/02/09	PMC2174804		10.1083/jcb.148.3.495	J Cell Biol. 2000 Feb 7;148(3):495-504. doi: 10.1083/jcb.148.3.495.
Polar & Avian	0			29475453	Whole transcriptome analysis reveals differential gene expression profile reflecting macrophage polarization in response to influenza A H5N1 virus infection	Zhang N	BMC Med Genomics	2018	2018/02/25	PMC6389164		10.1186/s12920-018-0335-0	BMC Med Genomics. 2018 Feb 23;11(1):20. doi: 10.1186/s12920-018-0335-0.
Polar & Avian	0			33742093	Inside-out chicken enteroids with leukocyte component as a model to study host-pathogen interactions	Nash TJ	Commun Biol	2021	2021/03/20	PMC7979936		10.1038/s42003-021-01901-z	Commun Biol. 2021 Mar 19;4(1):377. doi: 10.1038/s42003-021-01901-z.
Polar & Avian	0			33547481	Non-competitive fluorescence polarization immunoassay for detection of H5 avian influenza virus using a portable analyzer	Nishiyama K	Anal Bioanal Chem	2021	2021/02/06	PMC7864621		10.1007/s00216-021-03193-y	Anal Bioanal Chem. 2021 Jul;413(18):4619-4623. doi: 10.1007/s00216-021-03193-y. Epub 2021 Feb 5.
Polar & Avian	0			10189374	The MAL proteolipid is necessary for normal apical transport and accurate sorting of the influenza virus hemagglutinin in Madin-Darby canine kidney cells	Puertollano R	J Cell Biol	1999	1999/04/06	PMC2148211		10.1083/jcb.145.1.141	J Cell Biol. 1999 Apr 5;145(1):141-51. doi: 10.1083/jcb.145.1.141.
Polar & Avian	0			21247458	Analysis of the PDZ binding specificities of Influenza A virus NS1 proteins	Thomas M	Virol J	2011	2011/01/21	PMC3030508		10.1186/1743-422X-8-25	Virol J. 2011 Jan 19;8:25. doi: 10.1186/1743-422X-8-25.
Polar & Avian	0			19117662	On the structure-based design of novel inhibitors of H5N1 influenza A virus neuraminidase (NA)	Mitrasinovic PM	Biophys Chem	2009	2009/01/02			10.1016/j.bpc.2008.11.004	Biophys Chem. 2009 Mar;140(1-3):35-8. doi: 10.1016/j.bpc.2008.11.004. Epub 2008 Nov 20.
Polar & Avian	0			6329709	Viruses budding from either the apical or the basolateral plasma membrane domain of MDCK cells have unique phospholipid compositions	van Meer G	EMBO J	1982	1982/01/01	PMC553120			EMBO J. 1982;1(7):847-52.
Polar & Avian	0			33612849	A THz graphene metasurface for polarization selective virus sensing	Amin M	Carbon N Y	2021	2021/02/22	PMC7881294		10.1016/j.carbon.2021.02.051	Carbon N Y. 2021 May;176:580-591. doi: 10.1016/j.carbon.2021.02.051. Epub 2021 Feb 13.
Polar & Avian	0			6088077	Vesicular stomatitis virus infects and matures only through the basolateral surface of the polarized epithelial cell line, MDCK	Fuller S	Cell	1984	1984/08/01			10.1016/0092-8674(84)90527-0	Cell. 1984 Aug;38(1):65-77. doi: 10.1016/0092-8674(84)90527-0.
Polar & Avian	0			17686870	Fusion induced by a class II viral fusion protein, semliki forest virus E1, is dependent on the voltage of the target cell	Markosyan RM	J Virol	2007	2007/08/10	PMC2045574		10.1128/JVI.01256-07	J Virol. 2007 Oct;81(20):11218-25. doi: 10.1128/JVI.01256-07. Epub 2007 Aug 8.
Polar & Avian	0			2991300	Intracellular sorting and basolateral appearance of the G protein of vesicular stomatitis virus in Madin-Darby canine kidney cells	Pfeiffer S	J Cell Biol	1985	1985/08/01	PMC2113651		10.1083/jcb.101.2.470	J Cell Biol. 1985 Aug;101(2):470-6. doi: 10.1083/jcb.101.2.470.
Polar & Avian	0			218647	Early molecular events in the interaction of enveloped viruses with cells. I. A fluorescence and radioactivity study	Nicolau C	Biophys Struct Mech	1979	1979/03/21			10.1007/BF00535769	Biophys Struct Mech. 1979 Mar 21;5(1):11-23. doi: 10.1007/BF00535769.
Polar & Bird	0			22455929	Free-energy simulations reveal that both hydrophobic and polar interactions are important for influenza hemagglutinin antibody binding	Xia Z	Biophys J	2012	2012/03/30	PMC3309282		10.1016/j.bpj.2012.01.043	Biophys J. 2012 Mar 21;102(6):1453-61. doi: 10.1016/j.bpj.2012.01.043. Epub 2012 Mar 20.
Polar & Marine Mammals	0			22197247	In vitro inhibition of influenza A virus infection by marine microalga-derived sulfated polysaccharide p-KG03	Kim M	Antiviral Res	2012	2011/12/27			10.1016/j.antiviral.2011.12.006	Antiviral Res. 2012 Feb;93(2):253-259. doi: 10.1016/j.antiviral.2011.12.006. Epub 2011 Dec 14.
Polar & Warming	0			18434305	Differential sorting and Golgi export requirements for raft-associated and raft-independent apical proteins along the biosynthetic pathway	Guerriero CJ	J Biol Chem	2008	2008/04/25	PMC2440606		10.1074/jbc.M802048200	J Biol Chem. 2008 Jun 27;283(26):18040-7. doi: 10.1074/jbc.M802048200. Epub 2008 Apr 22.
Polar & Environment	0			25366965	Respiratory influenza virus infection induces intestinal immune injury via microbiota-mediated Th17 cell-dependent inflammation	Wang J	J Exp Med	2014	2014/11/05	PMC4235643		10.1084/jem.20140625	J Exp Med. 2014 Nov 17;211(12):2397-410. doi: 10.1084/jem.20140625. Epub 2014 Nov 3.
Polar & Environment	0			25378494	The influenza virus neuraminidase protein transmembrane and head domains have coevolved	da Silva DV	J Virol	2015	2014/11/08	PMC4300628		10.1128/JVI.02005-14	J Virol. 2015 Jan 15;89(2):1094-104. doi: 10.1128/JVI.02005-14. Epub 2014 Nov 5.
Polar & Environment	0			15567494	Assembly and budding of influenza virus	Nayak DP	Virus Res	2004	2004/11/30	PMC7172797		10.1016/j.virusres.2004.08.012	Virus Res. 2004 Dec;106(2):147-65. doi: 10.1016/j.virusres.2004.08.012.
Polar & Environment	0			32644803	Cholesterol Alters the Orientation and Activity of the Influenza Virus M2 Amphipathic Helix in the Membrane	Martyna A	J Phys Chem B	2020	2020/07/10	PMC7515559		10.1021/acs.jpcb.0c03331	J Phys Chem B. 2020 Aug 6;124(31):6738-6747. doi: 10.1021/acs.jpcb.0c03331. Epub 2020 Jul 23.
Polar & Environment	0			22470518	The impact of weather on influenza and pneumonia mortality in New York City, 1975-2002: a retrospective study	Davis RE	PLoS One	2012	2012/04/04	PMC3314701		10.1371/journal.pone.0034091	PLoS One. 2012;7(3):e34091. doi: 10.1371/journal.pone.0034091. Epub 2012 Mar 28.
Polar & Environment	0			28461098	Organization and dynamics of Trp14 of hemagglutinin fusion peptide in membrane mimetic environment	Meher G	Chem Phys Lipids	2017	2017/05/03			10.1016/j.chemphyslip.2017.04.010	Chem Phys Lipids. 2017 Jun;205:48-54. doi: 10.1016/j.chemphyslip.2017.04.010. Epub 2017 Apr 28.
Polar & Environment	0			33373420	Topical exposure to triclosan inhibits Th1 immune responses and reduces T cells responding to influenza infection in mice	Shane HL	PLoS One	2020	2020/12/29	PMC7771851		10.1371/journal.pone.0244436	PLoS One. 2020 Dec 29;15(12):e0244436. doi: 10.1371/journal.pone.0244436. eCollection 2020.
Polar & Environment	0			29976658	Strand-Specific Dual RNA Sequencing of Bronchial Epithelial Cells Infected with Influenza A/H3N2 Viruses Reveals Splicing of Gene Segment 6 and Novel Host-Virus Interactions	Fabozzi G	J Virol	2018	2018/07/07	PMC6096831		10.1128/JVI.00518-18	J Virol. 2018 Aug 16;92(17):e00518-18. doi: 10.1128/JVI.00518-18. Print 2018 Sep 1.
Polar & Environment	0			19242025	Pandemic influenza: imminent threat, preparedness and the divided globe	Chaturvedi S	Indian Pediatr	2009	2009/02/27				Indian Pediatr. 2009 Feb;46(2):115-21.
Polar & Environment	0			30348265	The role of respiratory epithelium in host defence against influenza virus infection	Denney L	Biomed J	2018	2018/10/24	PMC6197993		10.1016/j.bj.2018.08.004	Biomed J. 2018 Aug;41(4):218-233. doi: 10.1016/j.bj.2018.08.004. Epub 2018 Sep 10.
Polar & Environment	0			21381693	Specific binding of adamantane drugs and direction of their polar amines in the pore of the influenza M2 transmembrane domain in lipid bilayers and dodecylphosphocholine micelles determined by NMR spectroscopy	Cady SD	J Am Chem Soc	2011	2011/03/09	PMC3078525	NIHMS278783	10.1021/ja102581n	J Am Chem Soc. 2011 Mar 30;133(12):4274-84. doi: 10.1021/ja102581n. Epub 2011 Mar 7.
Polar & Environment	0			23134595	Pandemic influenza A virus codon usage revisited: biases, adaptation and implications for vaccine strain development	Goñi N	Virol J	2012	2012/11/09	PMC3543350		10.1186/1743-422X-9-263	Virol J. 2012 Nov 8;9:263. doi: 10.1186/1743-422X-9-263.
Polar & Environment	0			25944007	Antinociceptive and anti-inflammatory activities of Schefflera octophylla extracts	Chen Y	J Ethnopharmacol	2015	2015/05/07			10.1016/j.jep.2015.04.050	J Ethnopharmacol. 2015 Aug 2;171:42-50. doi: 10.1016/j.jep.2015.04.050. Epub 2015 May 2.
Polar & Environment	0			28190180	The effects of synoptic weather on influenza infection incidences: a retrospective study utilizing digital disease surveillance	Zhao N	Int J Biometeorol	2018	2017/02/13			10.1007/s00484-017-1306-4	Int J Biometeorol. 2018 Jan;62(1):69-84. doi: 10.1007/s00484-017-1306-4. Epub 2017 Feb 11.
Polar & Environment	0			29751591	Phosphatidylcholine Membrane Fusion Is pH-Dependent	Akimov SA	Int J Mol Sci	2018	2018/05/13	PMC5983597		10.3390/ijms19051358	Int J Mol Sci. 2018 May 3;19(5):1358. doi: 10.3390/ijms19051358.
Polar & Environment	0			20172856	PB1-F2 influenza A virus protein adopts a beta-sheet conformation and forms amyloid fibers in membrane environments	Chevalier C	J Biol Chem	2010	2010/02/23	PMC2857135		10.1074/jbc.M109.067710	J Biol Chem. 2010 Apr 23;285(17):13233-43. doi: 10.1074/jbc.M109.067710. Epub 2010 Feb 19.
Polar & Environment	0			21047961	The 2009 pandemic H1N1 and triple-reassortant swine H1N1 influenza viruses replicate efficiently but elicit an attenuated inflammatory response in polarized human bronchial epithelial cells	Zeng H	J Virol	2011	2010/11/05	PMC3020025		10.1128/JVI.01568-10	J Virol. 2011 Jan;85(2):686-96. doi: 10.1128/JVI.01568-10. Epub 2010 Nov 3.
Polar & Environment	0			16950366	Pandemic influenza preparedness in the Asia-Pacific region	Coker R	Lancet	2006	2006/09/05	PMC7123339		10.1016/S0140-6736(06)69209-X	Lancet. 2006 Sep 2;368(9538):886-9. doi: 10.1016/S0140-6736(06)69209-X.
Polar & Environment	0			23061590	The challenge of providing the public with actionable information during a pandemic	Gerwin LE	J Law Med Ethics	2012	2012/10/16			10.1111/j.1748-720X.2012.00695.x	J Law Med Ethics. 2012 Fall;40(3):630-54. doi: 10.1111/j.1748-720X.2012.00695.x.
Polar & Environment	0			31826303	A Molecular Chameleon for Mapping Subcellular Polarity in an Unfolded Proteome Environment	Owyong TC	Angew Chem Int Ed Engl	2020	2019/12/12			10.1002/anie.201914263	Angew Chem Int Ed Engl. 2020 Jun 15;59(25):10129-10135. doi: 10.1002/anie.201914263. Epub 2020 Jan 8.
Polar & Environment	0			15129552	Does high organochlorine (OC) exposure impair the resistance to infection in polar bears (Ursus maritimus)? Part I: Effect of OCs on the humoral immunity	Lie E	J Toxicol Environ Health A	2004	2004/05/08			10.1080/15287390490425597	J Toxicol Environ Health A. 2004 Apr 9;67(7):555-82. doi: 10.1080/15287390490425597.
Polar & Environment	0			30968902	What are the effects of the serine triad on proton conduction of an influenza B M2 channel? An investigation by molecular dynamics simulations	Zhang Y	Phys Chem Chem Phys	2019	2019/04/11			10.1039/c9cp00612e	Phys Chem Chem Phys. 2019 Apr 24;21(17):8820-8826. doi: 10.1039/c9cp00612e.
Polar & Environment	0			27286559	Solid-State NMR Investigation of the Conformation, Proton Conduction, and Hydration of the Influenza B Virus M2 Transmembrane Proton Channel	Williams JK	J Am Chem Soc	2016	2016/06/11	PMC5257200	NIHMS842983	10.1021/jacs.6b03142	J Am Chem Soc. 2016 Jul 6;138(26):8143-55. doi: 10.1021/jacs.6b03142. Epub 2016 Jun 23.
Polar & Environment	0			23820884	Bacterial colonization dampens influenza-mediated acute lung injury via induction of M2 alveolar macrophages	Wang J	Nat Commun	2013	2013/07/04	PMC3715851		10.1038/ncomms3106	Nat Commun. 2013;4:2106. doi: 10.1038/ncomms3106.
Polar & Environment	0			8383696	Immortalization of polarized rat retinal pigment epithelium	Nabi IR	J Cell Sci	1993	1993/01/01				J Cell Sci. 1993 Jan;104 ( Pt 1):37-49.
Polar & Environment	0			26873390	Efficient DNP NMR of membrane proteins: sample preparation protocols, sensitivity, and radical location	Liao SY	J Biomol NMR	2016	2016/02/14	PMC4826309	NIHMS760031	10.1007/s10858-016-0023-3	J Biomol NMR. 2016 Mar;64(3):223-37. doi: 10.1007/s10858-016-0023-3. Epub 2016 Feb 12.
Polar & Environment	0			3390606	Neutrophil interaction with influenza-infected epithelial cells	Ratcliffe DR	Blood	1988	1988/07/01				Blood. 1988 Jul;72(1):142-9.
Polar & Environment	0			22563521	Environment Polarity in Proteins Mapped Noninvasively by FTIR Spectroscopy	Manor J	J Phys Chem Lett	2012	2012/05/08	PMC3341589	NIHMS365468	10.1021/jz300150v	J Phys Chem Lett. 2012 Mar 12;3(7):939-944. doi: 10.1021/jz300150v.
Polar & Environment	0			17522969	Characterization of protomer interfaces in HslV protease; the bacterial homologue of 20S proteasome	Azim MK	Protein J	2007	2007/05/25			10.1007/s10930-006-9048-x	Protein J. 2007 Jun;26(4):213-9. doi: 10.1007/s10930-006-9048-x.
Polar & Environment	0			9264459	Apical sorting of influenza hemagglutinin by transcytosis in retinal pigment epithelium	Bonilha VL	J Cell Sci	1997	1997/08/01				J Cell Sci. 1997 Aug;110 ( Pt 15):1717-27.
Polar & Environment	0			19234206	Acute, but not resolved, influenza A infection enhances susceptibility to house dust mite-induced allergic disease	Al-Garawi AA	J Immunol	2009	2009/02/24			10.4049/jimmunol.0802837	J Immunol. 2009 Mar 1;182(5):3095-104. doi: 10.4049/jimmunol.0802837.
Polar & Environment	0			10766949	Transmembrane domains of viral ion channel proteins: a molecular dynamics simulation study	Fischer WB	Biopolymers	2000	2000/04/15			10.1002/(SICI)1097-0282(200006)53:7<529::AID-BIP1>3.0.CO;2-6	Biopolymers. 2000 Jun;53(7):529-38. doi: 10.1002/(SICI)1097-0282(200006)53:7<529::AID-BIP1>3.0.CO;2-6.
Polar & Environment	0			19374421	Conformational free energy surface of alpha-N-acetylneuraminic acid: an interplay between hydrogen bonding and solvation	Spiwok V	J Phys Chem B	2009	2009/04/21			10.1021/jp8113495	J Phys Chem B. 2009 Jul 16;113(28):9589-94. doi: 10.1021/jp8113495.
Polar & Environment	0			28333446	Quantification of Membrane Protein Self-Association with a High-Throughput Compatible Fluorescence Assay	Li J	Biochemistry	2017	2017/03/24			10.1021/acs.biochem.7b00009	Biochemistry. 2017 Apr 11;56(14):1951-1954. doi: 10.1021/acs.biochem.7b00009. Epub 2017 Apr 3.
Polar & Environment	0			22721993	The impact of past epidemics on future disease dynamics	Bansal S	J Theor Biol	2012	2012/06/23			10.1016/j.jtbi.2012.06.012	J Theor Biol. 2012 Sep 21;309:176-84. doi: 10.1016/j.jtbi.2012.06.012. Epub 2012 Jun 18.
Polar & Environment	0			21631959	Comparative thermodynamic studies on substrate and product binding of O-acetylserine sulfhydrylase reveals two different ligand recognition modes	Banerjee S	BMC Biochem	2011	2011/06/03	PMC3141655		10.1186/1471-2091-12-31	BMC Biochem. 2011 Jun 2;12:31. doi: 10.1186/1471-2091-12-31.
Polar & Environment	0			14617347	Features of influenza HA required for apical sorting differ from those required for association with DRMs or MAL	Tall RD	Traffic	2003	2003/11/18			10.1046/j.1398-9219.2003.0138.x	Traffic. 2003 Dec;4(12):838-49. doi: 10.1046/j.1398-9219.2003.0138.x.
Polar & Environment	0			16365450	Chemotactic responses of IL-4-, IL-10-, and IFN-gamma-producing CD4+ T cells depend on tissue origin and microbial stimulus	Debes GF	J Immunol	2006	2005/12/21			10.4049/jimmunol.176.1.557	J Immunol. 2006 Jan 1;176(1):557-66. doi: 10.4049/jimmunol.176.1.557.
Polar & Environment	0			2981229	Polarized delivery of viral glycoproteins to the apical and basolateral plasma membranes of Madin-Darby canine kidney cells infected with temperature-sensitive viruses	Rindler MJ	J Cell Biol	1985	1985/01/01	PMC2113482		10.1083/jcb.100.1.136	J Cell Biol. 1985 Jan;100(1):136-51. doi: 10.1083/jcb.100.1.136.
Polar & Environment	0			11581287	KIFC3, a microtubule minus end-directed motor for the apical transport of annexin XIIIb-associated Triton-insoluble membranes	Noda Y	J Cell Biol	2001	2001/10/03	PMC2150803		10.1083/jcb.200108042	J Cell Biol. 2001 Oct 1;155(1):77-88. doi: 10.1083/jcb.200108042.
Polar & Environment	0			9585412	Lipid domain structure of the plasma membrane revealed by patching of membrane components	Harder T	J Cell Biol	1998	1998/06/20	PMC2132776		10.1083/jcb.141.4.929	J Cell Biol. 1998 May 18;141(4):929-42. doi: 10.1083/jcb.141.4.929.
Polar & Environment	0			25340313	Combined quantum mechanics/molecular mechanics (QM/MM) simulations for protein-ligand complexes: free energies of binding of water molecules in influenza neuraminidase	Woods CJ	J Phys Chem B	2015	2014/10/24			10.1021/jp506413j	J Phys Chem B. 2015 Jan 22;119(3):997-1001. doi: 10.1021/jp506413j. Epub 2014 Nov 7.
Polar & Environment	0			6196188	Effects of lignite fly ash particulates and soluble components on the interferon system	Hahon N	Environ Res	1983	1983/12/01			10.1016/0013-9351(83)90116-0	Environ Res. 1983 Dec;32(2):329-43. doi: 10.1016/0013-9351(83)90116-0.
Polar & Environment	0			3937554	Labeling of the cytoplasmic domain of the influenza virus hemagglutinin with fluorescein reveals sites of interaction with membrane lipid bilayers	Lyles DS	Biochemistry	1985	1985/12/31			10.1021/bi00348a043	Biochemistry. 1985 Dec 31;24(27):8121-8. doi: 10.1021/bi00348a043.
Polar & Environment	0			23480101	Dynamic nuclear polarization study of inhibitor binding to the M2(18-60) proton transporter from influenza A	Andreas LB	Biochemistry	2013	2013/03/14	PMC3646523	NIHMS467015	10.1021/bi400150x	Biochemistry. 2013 Apr 23;52(16):2774-82. doi: 10.1021/bi400150x. Epub 2013 Apr 10.
Polar & Environment	0			2384528	Binding of exocytic vesicles from MDCK cells to microtubules in vitro	Van der Sluijs P	J Cell Sci	1990	1990/04/01				J Cell Sci. 1990 Apr;95 ( Pt 4):545-53.
Polar & Environment	0			12470636	Solution structure of the ribosome-associated cold shock response protein Yfia of Escherichia coli	Rak A	Biochem Biophys Res Commun	2002	2002/12/10			10.1016/s0006-291x(02)02721-3	Biochem Biophys Res Commun. 2002 Dec 20;299(5):710-4. doi: 10.1016/s0006-291x(02)02721-3.
Polar & Environment	0			6758696	Rapid identification of microorganisms by circular-intensity differential scattering	Salzman GC	Appl Environ Microbiol	1982	1982/11/01	PMC242152		10.1128/aem.44.5.1081-1085.1982	Appl Environ Microbiol. 1982 Nov;44(5):1081-5. doi: 10.1128/aem.44.5.1081-1085.1982.
Polar & Environment	0			11724575	Mutagenesis identifies amino acid residues in extracellular loops and within the barrel lumen that determine voltage gating of porin from Haemophilus influenzae type b	Arbing MA	Biochemistry	2001	2001/11/29			10.1021/bi015611y	Biochemistry. 2001 Dec 4;40(48):14621-8. doi: 10.1021/bi015611y.
Polar & Environment	0			10096886	Defining the transmembrane helix of M2 protein from influenza A by molecular dynamics simulations in a lipid bilayer	Forrest LR	Biophys J	1999	1999/03/30	PMC1300164		10.1016/s0006-3495(99)77347-9	Biophys J. 1999 Apr;76(4):1886-96. doi: 10.1016/s0006-3495(99)77347-9.
Polar & Environment	0			10462487	Anomeric specificity and protein-substrate interactions support the 3D model for the hemagglutinin-neuraminidase from sendai virus	Bellini T	Biochem Biophys Res Commun	1999	1999/08/27			10.1006/bbrc.1999.1204	Biochem Biophys Res Commun. 1999 Aug 27;262(2):401-5. doi: 10.1006/bbrc.1999.1204.
Polar & Environment	0			27960325	Probing Hydronium Ion Histidine NH Exchange Rate Constants in the M2 Channel via Indirect Observation of Dipolar-Dephased (15)N Signals in Magic-Angle-Spinning NMR	Fu R	J Am Chem Soc	2016	2016/12/15	PMC5368641	NIHMS852022	10.1021/jacs.6b08376	J Am Chem Soc. 2016 Dec 14;138(49):15801-15804. doi: 10.1021/jacs.6b08376. Epub 2016 Dec 1.
Polar & Environment	0			14701867	Physiological characterization of Haemophilus influenzae Rd deficient in its glutathione-dependent peroxidase PGdx	Pauwels F	J Biol Chem	2004	2004/01/01			10.1074/jbc.M312037200	J Biol Chem. 2004 Mar 26;279(13):12163-70. doi: 10.1074/jbc.M312037200. Epub 2003 Dec 29.
Polar & Environment	0			2551094	Fluorescence anisotropy of UV-irradiated viruses	Hörer OL	Virologie	1989	1989/04/01				Virologie. 1989 Apr-Jun;40(2):115-8.
Polar & Environment	0			12423339	Domain V of m-calpain shows the potential to form an oblique-orientated alpha-helix, which may modulate the enzyme's activity via interactions with anionic lipid	Brandenburg K	Eur J Biochem	2002	2002/11/09			10.1046/j.1432-1033.2002.03225.x	Eur J Biochem. 2002 Nov;269(22):5414-22. doi: 10.1046/j.1432-1033.2002.03225.x.
Polar & Environment	0			6883510	Reduced temperature prevents transfer of a membrane glycoprotein to the cell surface but does not prevent terminal glycosylation	Matlin KS	Cell	1983	1983/08/01			10.1016/0092-8674(83)90154-x	Cell. 1983 Aug;34(1):233-43. doi: 10.1016/0092-8674(83)90154-x.
Polar & Environment	0			11162481	The influence of ATP on the association and unfolding of the tyrosine repressor ligand response domain of Haemophilus influenzae	Kristl S	Biochem Biophys Res Commun	2001	2001/02/13			10.1006/bbrc.2000.4076	Biochem Biophys Res Commun. 2001 Jan 12;280(1):81-4. doi: 10.1006/bbrc.2000.4076.
Holarctic & Avian	0			25058514	The Eurasian genes of the 2009 pandemic influenza virus: an integrative perspective on their conveyance to and assimilation in America	Shoham D	Crit Rev Microbiol	2016	2014/07/25			10.3109/1040841X.2014.920291	Crit Rev Microbiol. 2016;42(2):222-32. doi: 10.3109/1040841X.2014.920291. Epub 2014 Jul 24.
Russia & Wildlife	0			25629583	Homeopathic Oscillococcinum® for preventing and treating influenza and influenza-like illness	Mathie RT	Cochrane Database Syst Rev	2015	2015/01/29	PMC6726585		10.1002/14651858.CD001957.pub6	Cochrane Database Syst Rev. 2015 Jan 28;1(1):CD001957. doi: 10.1002/14651858.CD001957.pub6.
Russia & Wildlife	0			33219213	Dominant subtype switch in avian influenza viruses during 2016-2019 in China	Bi Y	Nat Commun	2020	2020/11/21	PMC7679419		10.1038/s41467-020-19671-3	Nat Commun. 2020 Nov 20;11(1):5909. doi: 10.1038/s41467-020-19671-3.
Russia & Wildlife	0			30431664	Umifenovir susceptibility monitoring and characterization of influenza viruses isolated during ARBITR clinical study	Leneva IA	J Med Virol	2019	2018/11/16			10.1002/jmv.25358	J Med Virol. 2019 Apr;91(4):588-597. doi: 10.1002/jmv.25358. Epub 2018 Dec 2.
Russia & Wildlife	0			29872951	Humoral immunity to influenza in an at-risk population and severe influenza cases in Russia in 2016-2017	Ilyicheva TN	Arch Virol	2018	2018/06/07			10.1007/s00705-018-3904-9	Arch Virol. 2018 Oct;163(10):2675-2685. doi: 10.1007/s00705-018-3904-9. Epub 2018 Jun 5.
Arctic & Environment	1	1	0	29626767	Environmental contaminant mixtures modulate in vitro influenza infection	Desforges JP	Sci Total Environ	2018	2018/04/08			10.1016/j.scitotenv.2018.03.321	Sci Total Environ. 2018 Sep 1;634:20-28. doi: 10.1016/j.scitotenv.2018.03.321. Epub 2018 Apr 4.
Russia & Wildlife	0			32888050	2020 taxonomic update for phylum Negarnaviricota (Riboviria: Orthornavirae), including the large orders Bunyavirales and Mononegavirales	Kuhn JH	Arch Virol	2020	2020/09/05	PMC7606449	NIHMS1626555	10.1007/s00705-020-04731-2	Arch Virol. 2020 Dec;165(12):3023-3072. doi: 10.1007/s00705-020-04731-2. Epub 2020 Sep 4.
Russia & Wildlife	0			28750037	Generation and characterization of interferon-lambda 1-resistant H1N1 influenza A viruses	Ilyushina NA	PLoS One	2017	2017/07/28	PMC5531537		10.1371/journal.pone.0181999	PLoS One. 2017 Jul 27;12(7):e0181999. doi: 10.1371/journal.pone.0181999. eCollection 2017.
Alaska & Wildlife	1	1	0	23355978	A robust tool highlights the influence of bird migration on influenza A virus evolution	Dugan VG	Mol Ecol	2012	2013/01/29			10.1111/mec.12101	Mol Ecol. 2012 Dec;21(24):5905-7. doi: 10.1111/mec.12101.
Russia & Wildlife	0			26036326	Genetic and antigenic characterization of H5 and H7 influenza viruses isolated from migratory water birds in Hokkaido, Japan and Mongolia from 2010 to 2014	Hiono T	Virus Genes	2015	2015/06/04			10.1007/s11262-015-1214-9	Virus Genes. 2015 Aug;51(1):57-68. doi: 10.1007/s11262-015-1214-9. Epub 2015 Jun 3.
Iceland & Wildlife	1	1	1	24647410	North Atlantic migratory bird flyways provide routes for intercontinental movement of avian influenza viruses	Dusek RJ	PLoS One	2014	2014/03/21	PMC3960164		10.1371/journal.pone.0092075	PLoS One. 2014 Mar 19;9(3):e92075. doi: 10.1371/journal.pone.0092075. eCollection 2014.
Russia & Wildlife	1	1	0	26542001	What adaptive changes in hemagglutinin and neuraminidase are necessary for emergence of pandemic influenza virus from its avian precursor?	Gambaryan AS	Biochemistry (Mosc)	2015	2015/11/07			10.1134/S000629791507007X	Biochemistry (Mosc). 2015 Jul;80(7):872-80. doi: 10.1134/S000629791507007X.
Norway & Wildlife	1	1	0	20426812	Prevalence and subtypes of influenza A viruses in wild waterfowl in Norway 2006-2007	Germundsson A	Acta Vet Scand	2010	2010/04/30	PMC2873271		10.1186/1751-0147-52-28	Acta Vet Scand. 2010 Apr 28;52(1):28. doi: 10.1186/1751-0147-52-28.
Subarctic & Wildlife	1	1	1	N/A	Climate change and avian influenza	Gilbert M	Rev Sci Tech	2008	2008/09/30	PMC2709837	NIHMS121129		Rev Sci Tech. 2008 Aug;27(2):459-66.
Russia & Wildlife	0			29920971	Phylogenetic and molecular analysis of highly pathogenic avian influenza H5N8 and H5N5 viruses detected in Poland in 2016-2017	Świętoń E	Transbound Emerg Dis	2018	2018/06/20			10.1111/tbed.12924	Transbound Emerg Dis. 2018 Dec;65(6):1664-1670. doi: 10.1111/tbed.12924. Epub 2018 Jun 19.
Arctic & Avian	1	1	1	30792982	Comparative Health Assessments of Alaskan Ice Seals	Goertz CEC	Front Vet Sci	2019	2019/02/23	PMC6375287		10.3389/fvets.2019.00004	Front Vet Sci. 2019 Feb 6;6:4. doi: 10.3389/fvets.2019.00004. eCollection 2019.
Russia & Wildlife	0			18784792	Protection against mouse and avian influenza A strains via vaccination with a combination of conserved proteins NP, M1 and NS1	Zhirnov OP	Influenza Other Respir Viruses	2007	2008/09/12	PMC2040185		10.1111/j.1750-2659.2007.00010.x	Influenza Other Respir Viruses. 2007 Mar;1(2):71-9. doi: 10.1111/j.1750-2659.2007.00010.x.
Arctic & Avian	1	1	0	29323841	Influenza A virus in the Western Arctic	Grebennikova TV	Vopr Virusol	2017	2018/01/12				Vopr Virusol. 2017;62(1):11-7.
Russia & Wildlife	0			31071540	Genetics and pathogenicity of H5N6 highly pathogenic avian influenza viruses isolated from wild birds and a chicken in Japan during winter 2017-2018	Mine J	Virology	2019	2019/05/10			10.1016/j.virol.2019.04.011	Virology. 2019 Jul;533:1-11. doi: 10.1016/j.virol.2019.04.011. Epub 2019 May 2.
Russia & Wildlife	0			27309081	Isolation and Genetic Characterization of Avian Influenza Viruses Isolated from Wild Birds in the Azov-Black Sea Region of Ukraine (2001-2012)	Muzyka D	Avian Dis	2016	2016/06/17			10.1637/11114-050115-Reg	Avian Dis. 2016 May;60(1 Suppl):365-77. doi: 10.1637/11114-050115-Reg.
Russia & Wildlife	0			31580519	Novel H5N6 avian influenza virus reassortants with European H5N8 isolated in migratory birds, China	Sun J	Transbound Emerg Dis	2020	2019/10/04			10.1111/tbed.13380	Transbound Emerg Dis. 2020 Mar;67(2):648-660. doi: 10.1111/tbed.13380. Epub 2019 Oct 23.
Canada & Avian	1	1	0	19432000	Survival of avian influenza and Newcastle disease viruses in compost and at ambient temperatures based on virus isolation and real-time reverse transcriptase PCR	Guan J	Avian Dis	2009	2009/05/13			10.1637/8381-062008-Reg.1	Avian Dis. 2009 Mar;53(1):26-33. doi: 10.1637/8381-062008-Reg.1.
Russia & Wildlife	1	1	0	28690288	Genetic characterization of an H2N2 influenza virus isolated from a muskrat in Western Siberia	Gulyaeva M	J Vet Med Sci	2017	2017/07/11	PMC5573837		10.1292/jvms.17-0048	J Vet Med Sci. 2017 Aug 18;79(8):1461-1465. doi: 10.1292/jvms.17-0048. Epub 2017 Jul 10.
Canada & Wildlife	1	1	0	23742717	Evolution of a reassortant North American gull influenza virus lineage: drift, shift and stability	Hall JS	Virol J	2013	2013/06/08	PMC3706275		10.1186/1743-422X-10-179	Virol J. 2013 Jun 6;10:179. doi: 10.1186/1743-422X-10-179.
Russia & Wildlife	0			26105790	Herd immunity and fatal cases of influenza among the population exposed to poultry and wild birds in Russian Asia in 2013-2014	Ilyicheva T	J Med Virol	2016	2015/06/25			10.1002/jmv.24301	J Med Virol. 2016 Jan;88(1):35-44. doi: 10.1002/jmv.24301. Epub 2015 Jun 26.
Russia & Wildlife	0			26215439	A genetically adjuvanted influenza B virus vector increases immunogenicity and protective efficacy in mice	Kittel C	Arch Virol	2015	2015/07/29			10.1007/s00705-015-2525-9	Arch Virol. 2015 Oct;160(10):2525-34. doi: 10.1007/s00705-015-2525-9. Epub 2015 Jul 28.
Russia & Wildlife	0			26405798	Generation and Characterization of Live Attenuated Influenza A(H7N9) Candidate Vaccine Virus Based on Russian Donor of Attenuation	Shcherbik S	PLoS One	2015	2015/09/26	PMC4583547		10.1371/journal.pone.0138951	PLoS One. 2015 Sep 25;10(9):e0138951. doi: 10.1371/journal.pone.0138951. eCollection 2015.
Russia & Wildlife	0			31412173	[Change of phenotypic properties of escape mutants and readaptants of influenza virus A (H1N1)pdm09 under the influence of selected mutations in the molecule of hemagglutinin.]	Timofeeva TA	Vopr Virusol	2019	2019/08/15			10.18821/0507-4088-2019-64-2-73-78	Vopr Virusol. 2019;64(2):73-78. doi: 10.18821/0507-4088-2019-64-2-73-78.
Russia & Wildlife	0			27649599	Antiviral Effect of Agaricomycetes Mushrooms (Review)	Teplyakova TV	Int J Med Mushrooms	2016	2016/09/22			10.1615/intjmedmushrooms.v18.i5.10	Int J Med Mushrooms. 2016;18(5):375-86. doi: 10.1615/intjmedmushrooms.v18.i5.10.
Russia & Wildlife	0			15188650	[Ecology and evolution of influenza viruses in Russia (1979-2002)]	L'vov DK	Vopr Virusol	2004	2004/06/11				Vopr Virusol. 2004 May-Jun;49(3):17-24.
Russia & Wildlife	0			27807224	Amino Acids in Hemagglutinin Antigenic Site B Determine Antigenic and Receptor Binding Differences between A(H3N2)v and Ancestral Seasonal H3N2 Influenza Viruses	Wang X	J Virol	2017	2016/11/04	PMC5215349		10.1128/JVI.01512-16	J Virol. 2017 Jan 3;91(2):e01512-16. doi: 10.1128/JVI.01512-16. Print 2017 Jan 15.
Russia & Wildlife	0			28210631	Immunogenicity and Cross Protection in Mice Afforded by Pandemic H1N1 Live Attenuated Influenza Vaccine Containing Wild-Type Nucleoprotein	Rekstin A	Biomed Res Int	2017	2017/02/18	PMC5292185		10.1155/2017/9359276	Biomed Res Int. 2017;2017:9359276. doi: 10.1155/2017/9359276. Epub 2017 Jan 22.
Iceland & Wildlife	1	1	1	25239729	Avian influenza virus ecology in Iceland shorebirds: intercontinental reassortment and movement	Hall JS	Infect Genet Evol	2014	2014/09/21			10.1016/j.meegid.2014.09.013	Infect Genet Evol. 2014 Dec;28:130-6. doi: 10.1016/j.meegid.2014.09.013. Epub 2014 Sep 18.
Russia & Wildlife	0			29929009	Safety, immunogenicity and protection of A(H3N2) live attenuated influenza vaccines containing wild-type nucleoprotein in a ferret model	Korenkov DA	Infect Genet Evol	2018	2018/06/22	PMC6330673	NIHMS1003193	10.1016/j.meegid.2018.06.019	Infect Genet Evol. 2018 Oct;64:95-104. doi: 10.1016/j.meegid.2018.06.019. Epub 2018 Jun 19.
Russia & Wildlife	0			25058039	Development and pre-clinical evaluation of two LAIV strains against potentially pandemic H2N2 influenza virus	Isakova-Sivak I	PLoS One	2014	2014/07/25	PMC4109939		10.1371/journal.pone.0102339	PLoS One. 2014 Jul 24;9(7):e102339. doi: 10.1371/journal.pone.0102339. eCollection 2014.
Russia & Wildlife	0			32143363	Novel HPAIV H5N8 Reassortant (Clade 2.3.4.4b) Detected in Germany	King J	Viruses	2020	2020/03/08	PMC7150876		10.3390/v12030281	Viruses. 2020 Mar 4;12(3):281. doi: 10.3390/v12030281.
Iceland & Wildlife	1	1	1	26677841	Avian Influenza Ecology in North Atlantic Sea Ducks: Not All Ducks Are Created Equal	Hall JS	PLoS One	2015	2015/12/19	PMC4683078		10.1371/journal.pone.0144524	PLoS One. 2015 Dec 17;10(12):e0144524. doi: 10.1371/journal.pone.0144524. eCollection 2015.
Arctic & Wildlife	1	1	1	27309071	First Characterization of Avian Influenza Viruses from Greenland 2014	Hartby CM	Avian Dis	2016	2016/06/17			10.1637/11119-050515-RegR	Avian Dis. 2016 May;60(1 Suppl):302-10. doi: 10.1637/11119-050515-RegR.
Arctic & Wildlife	1	1	1	30289331	SURVEY OF ARCTIC ALASKAN WILDLIFE FOR INFLUENZA A ANTIBODIES: LIMITED EVIDENCE FOR EXPOSURE OF MAMMALS	Hemert CV	J Wildl Dis	2019	2018/10/06			10.7589/2018-05-128	J Wildl Dis. 2019 Apr;55(2):387-398. doi: 10.7589/2018-05-128. Epub 2018 Oct 5.
Russia & Wildlife	0			28083862	Pathogenicity assessment of wild-type and mouse-adapted influenza A(H1N1) pdm09 viruses in comparison with highly pathogenic influenza A(H5N1) virus	Prokopyeva EA	Histol Histopathol	2017	2017/01/14			10.14670/HH-11-866	Histol Histopathol. 2017 Oct;32(10):1057-1063. doi: 10.14670/HH-11-866. Epub 2017 Jan 13.
Russia & Wildlife	0			11099837	Trichinellosis: a worldwide zoonosis	Dupouy-Camet J	Vet Parasitol	2000	2000/12/02			10.1016/s0304-4017(00)00341-1	Vet Parasitol. 2000 Dec 1;93(3-4):191-200. doi: 10.1016/s0304-4017(00)00341-1.
Russia & Wildlife	0			25685247	Live Attenuated Influenza H7N3 Vaccine is Safe, Immunogenic and Confers Protection in Animal Models	Rekstin A	Open Microbiol J	2014	2015/02/17	PMC4323838		10.2174/1874285801408010154	Open Microbiol J. 2014 Dec 31;8:154-62. doi: 10.2174/1874285801408010154. eCollection 2014.
Russia & Wildlife	0			24027311	Influenza A virus proteins NS1 and hemagglutinin along with M2 are involved in stimulation of autophagy in infected cells	Zhirnov OP	J Virol	2013	2013/09/13	PMC3838240		10.1128/JVI.02148-13	J Virol. 2013 Dec;87(24):13107-14. doi: 10.1128/JVI.02148-13. Epub 2013 Sep 11.
Alaska & Wildlife	1	1	1	28322698	Reassortment of Influenza A Viruses in Wild Birds in Alaska before H5 Clade 2.3.4.4 Outbreaks	Hill NJ	Emerg Infect Dis	2017	2017/03/22	PMC5367406		10.3201/eid2304.161668	Emerg Infect Dis. 2017 Apr;23(4):654-657. doi: 10.3201/eid2304.161668.
Canada & Wildlife	1	1	0	31750776	TARGETED RESEQUENCING OF WETLAND SEDIMENT AS A TOOL FOR AVIAN INFLUENZA VIRUS SURVEILLANCE	Himsworth CG	J Wildl Dis	2020	2019/11/22				J Wildl Dis. 2020 Apr;56(2):397-408. Epub 2019 Nov 21.
Alaska & Wildlife	1	1	1	18533040	Prevalence of Influenza A viruses in wild migratory birds in Alaska: patterns of variation in detection at a crossroads of intercontinental flyways	Ip HS	Virol J	2008	2008/06/06	PMC2435106		10.1186/1743-422X-5-71	Virol J. 2008 Jun 4;5:71. doi: 10.1186/1743-422X-5-71.
Russia & Wildlife	0			27829176	Comparative studies of infectivity, immunogenicity and cross-protective efficacy of live attenuated influenza vaccines containing nucleoprotein from cold-adapted or wild-type influenza virus in a mouse model	Isakova-Sivak I	Virology	2017	2016/11/10	PMC5127729	NIHMS830165	10.1016/j.virol.2016.10.027	Virology. 2017 Jan;500:209-217. doi: 10.1016/j.virol.2016.10.027. Epub 2016 Nov 6.
Alaska & Wildlife	1	1	1	7646350	Perpetuation of influenza A viruses in Alaskan waterfowl reservoirs	Ito T	Arch Virol	1995	1995/01/01			10.1007/BF01322743	Arch Virol. 1995;140(7):1163-72. doi: 10.1007/BF01322743.
Arctic & Avian	1	1	1	18198382	Prevalence and diversity of avian influenza viruses in environmental reservoirs	Lang AS	J Gen Virol	2008	2008/01/17			10.1099/vir.0.83369-0	J Gen Virol. 2008 Feb;89(Pt 2):509-519. doi: 10.1099/vir.0.83369-0.
Russia & Wildlife	0			20945793	Surveillance and identification of influenza A viruses in wild aquatic birds in the Crimea, Ukraine (2006-2008)	Kulak MV	Avian Dis	2010	2010/10/16			10.1637/9272-020510-ResNote.1	Avian Dis. 2010 Sep;54(3):1086-90. doi: 10.1637/9272-020510-ResNote.1.
Russia & Wildlife	0			12111429	Differences between influenza virus receptors on target cells of duck and chicken	Gambaryan A	Arch Virol	2002	2002/07/12			10.1007/s00705-002-0796-4	Arch Virol. 2002 Jun;147(6):1197-208. doi: 10.1007/s00705-002-0796-4.
Russia & Wildlife	0			29614716	Immunization of Domestic Ducks with Live Nonpathogenic H5N3 Influenza Virus Prevents Shedding and Transmission of Highly Pathogenic H5N1 Virus to Chickens	Gambaryan A	Viruses	2018	2018/04/05	PMC5923458		10.3390/v10040164	Viruses. 2018 Mar 31;10(4):164. doi: 10.3390/v10040164.
Russia & Wildlife	0			30246028	Cross-Protective Efficacy of Monovalent Live Influenza B Vaccines against Genetically Different Lineages of B/Victoria and B/Yamagata in Ferrets	Kiseleva I	Biomed Res Int	2018	2018/09/25	PMC6136522		10.1155/2018/9695628	Biomed Res Int. 2018 Aug 30;2018:9695628. doi: 10.1155/2018/9695628. eCollection 2018.
Russia & Wildlife	0			22377052	Highly pathogenic avian influenza (H5N1) outbreaks in wild birds and poultry, South Korea	Kim HR	Emerg Infect Dis	2012	2012/03/02	PMC3309593		10.3201/eid1803.111490	Emerg Infect Dis. 2012 Mar;18(3):480-3. doi: 10.3201/eid1803.111490.
Russia & Wildlife	0			28055819	Outbreaks among Wild Birds and Domestic Poultry Caused by Reassorted Influenza A(H5N8) Clade 2.3.4.4 Viruses, Germany, 2016	Pohlmann A	Emerg Infect Dis	2017	2017/01/06	PMC5367393		10.3201/eid2304.161949	Emerg Infect Dis. 2017 Apr;23(4):633-636. doi: 10.3201/eid2304.161949. Epub 2017 Apr 15.
Russia & Wildlife	0			32496715	[Etiology of epidemic outbreaks COVID-19 on Wuhan, Hubei province, Chinese People Republic associated with 2019-nCoV (Nidovirales, Coronaviridae, Coronavirinae, Betacoronavirus, Subgenus Sarbecovirus): lessons of SARS-CoV outbreak.]	Lvov DK	Vopr Virusol	2020	2020/06/05			10.36233/0507-4088-2020-65-1-6-15	Vopr Virusol. 2020;65(1):6-15. doi: 10.36233/0507-4088-2020-65-1-6-15.
Russia & Wildlife	0			27997342	Evaluation of a candidate live attenuated influenza vaccine prepared in Changchun BCHT (China) for safety and efficacy in ferrets	Shen Z	Vaccine	2016	2016/12/21			10.1016/j.vaccine.2016.09.059	Vaccine. 2016 Nov 21;34(48):5953-5958. doi: 10.1016/j.vaccine.2016.09.059. Epub 2016 Oct 26.
Russia & Wildlife	0			20848174	Antigenic, genetic, and pathogenic characterization of H5N1 highly pathogenic avian influenza viruses isolated from dead whooper swans (Cygnus cygnus) found in northern Japan in 2008	Okamatsu M	Virus Genes	2010	2010/09/18			10.1007/s11262-010-0530-3	Virus Genes. 2010 Dec;41(3):351-7. doi: 10.1007/s11262-010-0530-3. Epub 2010 Sep 17.
Russia & Wildlife	0			20608533	Epidemiology of avian influenza virus in wild birds in Switzerland between 2006 and 2009	Baumer A	Avian Dis	2010	2010/07/09			10.1637/9119-110209-Reg.1	Avian Dis. 2010 Jun;54(2):875-84. doi: 10.1637/9119-110209-Reg.1.
Circumpolar & Wildlife	1	1	1	27309082	Assessing the Role of Seabirds in the Ecology of Influenza A Viruses	Lang AS	Avian Dis	2016	2016/06/17			10.1637/11135-050815-RegR	Avian Dis. 2016 May;60(1 Suppl):378-86. doi: 10.1637/11135-050815-RegR.
Russia & Wildlife	0			22345462	Receptor-binding profiles of H7 subtype influenza viruses in different host species	Gambaryan AS	J Virol	2012	2012/02/21	PMC3318648		10.1128/JVI.06959-11	J Virol. 2012 Apr;86(8):4370-9. doi: 10.1128/JVI.06959-11. Epub 2012 Feb 15.
Russia & Wildlife	1	1	1	25855748	Intercontinental Spread of Asian-Origin H5N8 to North America through Beringia by Migratory Birds	Lee DH	J Virol	2015	2015/04/10	PMC4474297		10.1128/JVI.00728-15	J Virol. 2015 Jun;89(12):6521-4. doi: 10.1128/JVI.00728-15. Epub 2015 Apr 8.
Arctic & Wildlife	1	1	1	32028933	Evidence of avian influenza virus in seabirds breeding on a Norwegian high-Arctic archipelago	Lee MM	BMC Vet Res	2020	2020/02/08	PMC7006154		10.1186/s12917-020-2265-2	BMC Vet Res. 2020 Feb 7;16(1):48. doi: 10.1186/s12917-020-2265-2.
Russia & Wildlife	0			14749187	Influenza H5 virus escape mutants: immune protection and antibody production in mice	Smirnov YA	Virus Res	2004	2004/01/30			10.1016/j.virusres.2003.11.012	Virus Res. 2004 Feb;99(2):205-8. doi: 10.1016/j.virusres.2003.11.012.
Russia & Wildlife	0			28652020	Development of a realtime RT-PCR assay for the rapid detection of influenza A(H2) viruses	Komissarov A	Mol Cell Probes	2017	2017/06/28	PMC7126497		10.1016/j.mcp.2017.06.005	Mol Cell Probes. 2017 Oct;35:57-63. doi: 10.1016/j.mcp.2017.06.005. Epub 2017 Jun 23.
Russia & Wildlife	0			18652681	6-sulfo sialyl Lewis X is the common receptor determinant recognized by H5, H6, H7 and H9 influenza viruses of terrestrial poultry	Gambaryan AS	Virol J	2008	2008/07/26	PMC2515299		10.1186/1743-422X-5-85	Virol J. 2008 Jul 24;5:85. doi: 10.1186/1743-422X-5-85.
Russia & Wildlife	0			19747708	Alterations in caspase cleavage motifs of NP and M2 proteins attenuate virulence of a highly pathogenic avian influenza virus	Zhirnov OP	Virology	2009	2009/09/15			10.1016/j.virol.2009.08.013	Virology. 2009 Nov 10;394(1):57-63. doi: 10.1016/j.virol.2009.08.013. Epub 2009 Sep 10.
Russia & Wildlife	0			28478526	Clade 2.3.4.4 avian influenza A (H5N8) outbreak in commercial poultry, Iran, 2016: the first report and update data	Ghafouri SA	Trop Anim Health Prod	2017	2017/05/08			10.1007/s11250-017-1302-z	Trop Anim Health Prod. 2017 Jun;49(5):1089-1093. doi: 10.1007/s11250-017-1302-z. Epub 2017 May 7.
Norway & Avian	1	1	0	34118927	First detection of highly pathogenic avian influenza virus in Norway	Madslien K	BMC Vet Res	2021	2021/06/13	PMC8199823		10.1186/s12917-021-02928-4	BMC Vet Res. 2021 Jun 12;17(1):218. doi: 10.1186/s12917-021-02928-4.
Russia & Wildlife	0			18031958	Phylogenetic analyses of highly pathogenic avian influenza virus isolates from Germany in 2006 and 2007 suggest at least three separate introductions of H5N1 virus	Starick E	Vet Microbiol	2008	2007/11/23			10.1016/j.vetmic.2007.10.012	Vet Microbiol. 2008 Apr 30;128(3-4):243-52. doi: 10.1016/j.vetmic.2007.10.012. Epub 2007 Oct 18.
Russia & Wildlife	0			28404848	Unique Structural Features of Influenza Virus H15 Hemagglutinin	Tzarum N	J Virol	2017	2017/04/14	PMC5446636		10.1128/JVI.00046-17	J Virol. 2017 May 26;91(12):e00046-17. doi: 10.1128/JVI.00046-17. Print 2017 Jun 15.
Russia & Wildlife	0			23063833	Possible outcomes of reassortment in vivo between wild type and live attenuated influenza vaccine strains	Kiseleva I	Vaccine	2012	2012/10/16			10.1016/j.vaccine.2012.09.076	Vaccine. 2012 Dec 7;30(51):7395-9. doi: 10.1016/j.vaccine.2012.09.076. Epub 2012 Oct 9.
Russia & Wildlife	0			19172904	[Infection of pigs with influenza A/H4 and A/H5 viruses isolated from wild birds on the territory of Russia]	Iamnikova SS	Vopr Virusol	2008	2009/01/29				Vopr Virusol. 2008 Nov-Dec;53(6):30-4.
Russia & Wildlife	0			16731936	Properties and dissemination of H5N1 viruses isolated during an influenza outbreak in migratory waterfowl in western China	Chen H	J Virol	2006	2006/05/30	PMC1472608		10.1128/JVI.00110-06	J Virol. 2006 Jun;80(12):5976-83. doi: 10.1128/JVI.00110-06.
Russia & Wildlife	0			16186239	Restoration of virulence of escape mutants of H5 and H9 influenza viruses by their readaptation to mice	Rudneva IA	J Gen Virol	2005	2005/09/28			10.1099/vir.0.81185-0	J Gen Virol. 2005 Oct;86(Pt 10):2831-2838. doi: 10.1099/vir.0.81185-0.
Russia & Wildlife	0			21267626	Flying over an infected landscape: distribution of highly pathogenic avian influenza H5N1 risk in South Asia and satellite tracking of wild waterfowl	Gilbert M	Ecohealth	2010	2011/01/27	PMC3166606		10.1007/s10393-010-0672-8	Ecohealth. 2010 Dec;7(4):448-58. doi: 10.1007/s10393-010-0672-8. Epub 2011 Jan 26.
Russia & Wildlife	0			17526215	[The situation and preventive measures against the spread of avian influenza on the territory of the country]	Onishchenko GG	Gig Sanit	2007	2007/05/29				Gig Sanit. 2007 Mar-Apr;(2):3-7.
Russia & Wildlife	0			17498292	First introduction of highly pathogenic H5N1 avian influenza A viruses in wild and domestic birds in Denmark, Northern Europe	Bragstad K	Virol J	2007	2007/05/15	PMC1876802		10.1186/1743-422X-4-43	Virol J. 2007 May 11;4:43. doi: 10.1186/1743-422X-4-43.
Canada & Wildlife	1	1	1	34410421	ANTIBODIES AGAINST INFLUENZA VIRUS TYPES A AND B IN CANADIAN SEALS	Measures LN	J Wildl Dis	2021	2021/08/19			10.7589/JWD-D-20-00175	J Wildl Dis. 2021 Aug 19. doi: 10.7589/JWD-D-20-00175. Online ahead of print.
Alaska & Wildlife	1	1	1	29980049	Avian influenza virus ecology and evolution through a climatic lens	Morin CW	Environ Int	2018	2018/07/07			10.1016/j.envint.2018.06.018	Environ Int. 2018 Oct;119:241-249. doi: 10.1016/j.envint.2018.06.018. Epub 2018 Jul 4.
Russia & Wildlife	0			22545553	Ecology of influenza virus in wild bird populations in Central Asia	Marchenko VY	Avian Dis	2012	2012/05/02			10.1637/9834-061611-ResNote.1	Avian Dis. 2012 Mar;56(1):234-7. doi: 10.1637/9834-061611-ResNote.1.
Russia & Wildlife	0			19141445	Influenza B mutant viruses with truncated NS1 proteins grow efficiently in Vero cells and are immunogenic in mice	Wressnigg N	J Gen Virol	2009	2009/01/15			10.1099/vir.0.006122-0	J Gen Virol. 2009 Feb;90(Pt 2):366-374. doi: 10.1099/vir.0.006122-0.
Arctic & Marine Mammals	1	1	1	11763748	Serologic evidence of influenza A infection in marine mammals of arctic Canada	Nielsen O	J Wildl Dis	2001	2002/01/05			10.7589/0090-3558-37.4.820	J Wildl Dis. 2001 Oct;37(4):820-5. doi: 10.7589/0090-3558-37.4.820.
Russia & Wildlife	0			24729605	Novel oral anti-influenza drug candidate AV5080	Ivachtchenko AV	J Antimicrob Chemother	2014	2014/04/15			10.1093/jac/dku074	J Antimicrob Chemother. 2014 Jul;69(7):1892-902. doi: 10.1093/jac/dku074. Epub 2014 Apr 11.
Russia & Wildlife	0			17374771	Contribution of H7 haemagglutinin to amantadine resistance and infectivity of influenza virus	Ilyushina NA	J Gen Virol	2007	2007/03/22			10.1099/vir.0.82256-0	J Gen Virol. 2007 Apr;88(Pt 4):1266-1274. doi: 10.1099/vir.0.82256-0.
Russia & Wildlife	0			30507951	Rationale for vaccination with trivalent or quadrivalent live attenuated influenza vaccines: Protective vaccine efficacy in the ferret model	Rudenko L	PLoS One	2018	2018/12/04	PMC6277076		10.1371/journal.pone.0208028	PLoS One. 2018 Dec 3;13(12):e0208028. doi: 10.1371/journal.pone.0208028. eCollection 2018.
Russia & Wildlife	0			24484481	Detection of seasonal weight loss and a serologic survey of potential pathogens in wild Pallas' cats (Felis [Otocolobus] manul) of the Daurian Steppe, Russia	Naidenko SV	J Wildl Dis	2014	2014/02/04			10.7589/2013-03-068	J Wildl Dis. 2014 Apr;50(2):188-94. doi: 10.7589/2013-03-068. Epub 2014 Jan 31.
Russia & Wildlife	0			10954551	Early alterations of the receptor-binding properties of H1, H2, and H3 avian influenza virus hemagglutinins after their introduction into mammals	Matrosovich M	J Virol	2000	2000/08/23	PMC116362		10.1128/jvi.74.18.8502-8512.2000	J Virol. 2000 Sep;74(18):8502-12. doi: 10.1128/jvi.74.18.8502-8512.2000.
Russia & Wildlife	0			20195900	Shift in oligosaccharide specificities of hemagglutinin and neuraminidase of influenza B viruses resistant to neuraminidase inhibitors	Mochalova L	Glycoconj J	2010	2010/03/03			10.1007/s10719-010-9280-7	Glycoconj J. 2010 Apr;27(3):321-7. doi: 10.1007/s10719-010-9280-7. Epub 2010 Mar 2.
Russia & Wildlife	0			19267595	Spring migration routes of mallards (Anas platyrhynchos) that winter in Japan, determined from satellite telemetry	Yamaguchi N	Zoolog Sci	2008	2009/03/10			10.2108/zsj.25.875	Zoolog Sci. 2008 Sep;25(9):875-81. doi: 10.2108/zsj.25.875.
Russia & Wildlife	0			26689144	Distribution and survival of Borrelia miyamotoi in human blood components	Thorp AM	Transfusion	2016	2015/12/23			10.1111/trf.13398	Transfusion. 2016 Mar;56(3):705-11. doi: 10.1111/trf.13398. Epub 2015 Dec 21.
Russia & Wildlife	0			34065033	Novel Clade 2.3.4.4b Highly Pathogenic Avian Influenza A H5N8 and H5N5 Viruses in Denmark, 2020	Liang Y	Viruses	2021	2021/06/02	PMC8151437		10.3390/v13050886	Viruses. 2021 May 11;13(5):886. doi: 10.3390/v13050886.
Russia & Wildlife	0			17014355	Evaluation of ProMED-mail as an electronic early warning system for emerging animal diseases: 1996 to 2004	Cowen P	J Am Vet Med Assoc	2006	2006/10/04			10.2460/javma.229.7.1090	J Am Vet Med Assoc. 2006 Oct 1;229(7):1090-9. doi: 10.2460/javma.229.7.1090.
Arctic & Marine Mammals	1	1	1	15557750	Antibodies to human-related H3 influenza A virus in Baikal seals (Phoca sibirica) and ringed seals (Phoca hispida) in Russia	Ohishi K	Microbiol Immunol	2004	2004/11/24			10.1111/j.1348-0421.2004.tb03610.x	Microbiol Immunol. 2004;48(11):905-9. doi: 10.1111/j.1348-0421.2004.tb03610.x.
Russia & Wildlife	0			27443670	Genetic evidence for avian influenza H5N1 viral transmission along the Black Sea-Mediterranean Flyway	Zhou S	J Gen Virol	2016	2016/07/23			10.1099/jgv.0.000534	J Gen Virol. 2016 Sep;97(9):2129-2134. doi: 10.1099/jgv.0.000534. Epub 2016 Jul 20.
Russia & Wildlife	0			22984464	Highly pathogenic avian influenza virus among wild birds in Mongolia	Gilbert M	PLoS One	2012	2012/09/18	PMC3439473		10.1371/journal.pone.0044097	PLoS One. 2012;7(9):e44097. doi: 10.1371/journal.pone.0044097. Epub 2012 Sep 11.
Russia & Wildlife	0			29382414	Local amplification of highly pathogenic avian influenza H5N8 viruses in wild birds in the Netherlands, 2016 to 2017	Poen MJ	Euro Surveill	2018	2018/02/01	PMC5801337		10.2807/1560-7917.ES.2018.23.4.17-00449	Euro Surveill. 2018 Jan;23(4):17-00449. doi: 10.2807/1560-7917.ES.2018.23.4.17-00449.
Russia & Wildlife	0			28892736	Five distinct reassortants of H5N6 highly pathogenic avian influenza A viruses affected Japan during the winter of 2016-2017	Takemae N	Virology	2017	2017/09/12			10.1016/j.virol.2017.08.035	Virology. 2017 Dec;512:8-20. doi: 10.1016/j.virol.2017.08.035. Epub 2017 Sep 9.
Russia & Wildlife	0			31288422	Sequential Immunization with Universal Live Attenuated Influenza Vaccine Candidates Protects Ferrets against a High-Dose Heterologous Virus Challenge	Isakova-Sivak I	Vaccines (Basel)	2019	2019/07/11	PMC6789596		10.3390/vaccines7030061	Vaccines (Basel). 2019 Jul 8;7(3):61. doi: 10.3390/vaccines7030061.
Russia & Wildlife	0			17251574	Molecular analysis of highly pathogenic avian influenza virus of subtype H5N1 isolated from wild birds and mammals in northern Germany	Weber S	J Gen Virol	2007	2007/01/26			10.1099/vir.0.82300-0	J Gen Virol. 2007 Feb;88(Pt 2):554-558. doi: 10.1099/vir.0.82300-0.
Russia & Wildlife	1	1	1	16627734	Global patterns of influenza a virus in wild birds	Olsen B	Science	2006	2006/04/22			10.1126/science.1122438	Science. 2006 Apr 21;312(5772):384-8. doi: 10.1126/science.1122438.
Russia & Wildlife	0			20021501	Phenotypic characteristics of novel swine-origin influenza A/California/07/2009 (H1N1) virus	Kiseleva I	Influenza Other Respir Viruses	2010	2009/12/22	PMC4941948		10.1111/j.1750-2659.2009.00118.x	Influenza Other Respir Viruses. 2010 Jan;4(1):1-5. doi: 10.1111/j.1750-2659.2009.00118.x.
Sweden & Wildlife	1	1	1	24599502	Sampling strategies and biodiversity of influenza A subtypes in wild birds	Olson SH	PLoS One	2014	2014/03/07	PMC3944928		10.1371/journal.pone.0090826	PLoS One. 2014 Mar 5;9(3):e90826. doi: 10.1371/journal.pone.0090826. eCollection 2014.
Alaska & Wildlife	1	1	1	21073586	Interspecific exchange of avian influenza virus genes in Alaska: the influence of trans-hemispheric migratory tendency and breeding ground sympatry	Pearce JM	Mol Ecol	2011	2010/11/16	PMC3041836	NIHMS246809	10.1111/j.1365-294X.2010.04908.x	Mol Ecol. 2011 Mar;20(5):1015-25. doi: 10.1111/j.1365-294X.2010.04908.x. Epub 2010 Nov 12.
Russia & Wildlife	0			26243601	Experimental infection and pathology of clade 2.2 H5N1 virus in gulls	Gulyaeva MA	J Vet Sci	2016	2015/08/06	PMC4921666		10.4142/jvs.2016.17.2.179	J Vet Sci. 2016 Jun 30;17(2):179-88. doi: 10.4142/jvs.2016.17.2.179.
Russia & Wildlife	0			31174704	Full genome characterization of Iranian H5N8 highly pathogenic avian influenza virus from Hooded Crow (Corvus cornix), 2017: The first report	Ghafouri SA	Comp Immunol Microbiol Infect Dis	2019	2019/06/09			10.1016/j.cimid.2019.03.005	Comp Immunol Microbiol Infect Dis. 2019 Jun;64:73-80. doi: 10.1016/j.cimid.2019.03.005. Epub 2019 Mar 8.
Sweden & Avian	1	1	0	22748173	Global animal disease surveillance	Perez A	Spat Spatiotemporal Epidemiol	2011	2012/07/04	PMC7185519		10.1016/j.sste.2011.07.006	Spat Spatiotemporal Epidemiol. 2011 Sep;2(3):135-45. doi: 10.1016/j.sste.2011.07.006. Epub 2011 Jul 19.
Canada & Wildlife	1	1	0	27485496	Prevalence of influenza A virus in live-captured North Atlantic gray seals: a possible wild reservoir	Puryear WB	Emerg Microbes Infect	2016	2016/08/04	PMC5034098		10.1038/emi.2016.77	Emerg Microbes Infect. 2016 Aug 3;5(8):e81. doi: 10.1038/emi.2016.77.
Alaska & Wildlife	1	1	1	21766196	Evidence for limited exchange of avian influenza viruses between seaducks and dabbling ducks at Alaska Peninsula coastal lagoons	Ramey AM	Arch Virol	2011	2011/07/19			10.1007/s00705-011-1059-z	Arch Virol. 2011 Oct;156(10):1813-21. doi: 10.1007/s00705-011-1059-z. Epub 2011 Jul 16.
Canada & Avian	1	1	0	24949926	Evidence for seasonal patterns in the relative abundance of avian influenza virus subtypes in blue-winged teal (Anas discors)	Ramey AM	J Wildl Dis	2014	2014/06/21			10.7589/2013-09-232	J Wildl Dis. 2014 Oct;50(4):916-22. doi: 10.7589/2013-09-232. Epub 2014 Jun 20.
Russia & Wildlife	0			18411933	Experiences in control of avian influenza in Europe, the Russian Federation and the Middle East	Brown IH	Dev Biol (Basel)	2007	2008/04/17				Dev Biol (Basel). 2007;130:33-8.
Russia & Wildlife	0			21786624	[Restriction analysis of genome composition of live influenza vaccine]	Kiseleva IV	Vopr Virusol	2011	2011/07/27				Vopr Virusol. 2011 May-Jun;56(3):28-32.
Russia & Wildlife	0			19798563	Evolutionary genetics of highly pathogenic H5N1 avian influenza viruses isolated from whooper swans in northern Japan in 2008	Usui T	Virus Genes	2009	2009/10/03			10.1007/s11262-009-0403-9	Virus Genes. 2009 Dec;39(3):319-23. doi: 10.1007/s11262-009-0403-9. Epub 2009 Oct 2.
Russia & Wildlife	0			17601049	[Monitoring of infectious diseases among wild boars]	Shcherbakov AV	Vopr Virusol	2007	2007/07/03				Vopr Virusol. 2007 May-Jun;52(3):29-33.
Alaska & Wildlife	1	1	1	26944444	Evidence for common ancestry among viruses isolated from wild birds in Beringia and highly pathogenic intercontinental reassortant H5N1 and H5N2 influenza A viruses	Ramey AM	Infect Genet Evol	2016	2016/03/06			10.1016/j.meegid.2016.02.035	Infect Genet Evol. 2016 Jun;40:176-185. doi: 10.1016/j.meegid.2016.02.035. Epub 2016 Mar 2.
Russia & Wildlife	0			29630683	The use of plant lectins to regulate H1N1 influenza A virus receptor binding activity	Lee N	PLoS One	2018	2018/04/10	PMC5891020		10.1371/journal.pone.0195525	PLoS One. 2018 Apr 9;13(4):e0195525. doi: 10.1371/journal.pone.0195525. eCollection 2018.
Russia & Wildlife	0			30165308	Selection of influenza virus resistant to the novel camphor-based antiviral camphecene results in loss of pathogenicity	Zarubaev VV	Virology	2018	2018/08/31			10.1016/j.virol.2018.08.011	Virology. 2018 Nov;524:69-77. doi: 10.1016/j.virol.2018.08.011. Epub 2018 Aug 27.
Russia & Wildlife	0			19239752	Characterization of avian influenza viruses A (H5N1) from wild birds, Hong Kong, 2004-2008	Smith GJ	Emerg Infect Dis	2009	2009/02/26	PMC2666293		10.3201/eid1503.081190	Emerg Infect Dis. 2009 Mar;15(3):402-7. doi: 10.3201/eid1503.081190.
Russia & Wildlife	0			11799156	NS1 protein of influenza A virus down-regulates apoptosis	Zhirnov OP	J Virol	2002	2002/01/19	PMC135891		10.1128/jvi.76.4.1617-1625.2002	J Virol. 2002 Feb;76(4):1617-25. doi: 10.1128/jvi.76.4.1617-1625.2002.
Arctic & Wildlife	1	1	1	30557123	EXPOSURE OF ALASKA BROWN BEARS (URSUS ARCTOS) TO BACTERIAL, VIRAL, AND PARASITIC AGENTS VARIES SPATIOTEMPORALLY AND MAY BE INFLUENCED BY AGE	Ramey AM	J Wildl Dis	2019	2018/12/18			10.7589/2018-07-173	J Wildl Dis. 2019 Jul;55(3):576-588. doi: 10.7589/2018-07-173. Epub 2018 Dec 17.
Russia & Wildlife	0			28537245	[Impact of mutations in nucleoprotein on replication of influenza virus A/Hong Kong/1/68/162/35 reassortants at different temperatures]	Pulkina AA	Mol Biol (Mosk)	2017	2017/05/25			10.7868/S0026898417010141	Mol Biol (Mosk). 2017 Mar-Apr;51(2):378-383. doi: 10.7868/S0026898417010141.
Russia & Wildlife	0			20071565	Evolutionary dynamics of multiple sublineages of H5N1 influenza viruses in Nigeria from 2006 to 2008	Fusaro A	J Virol	2010	2010/01/15	PMC2838112		10.1128/JVI.02385-09	J Virol. 2010 Apr;84(7):3239-47. doi: 10.1128/JVI.02385-09. Epub 2010 Jan 13.
Russia & Wildlife	1	1	1	31077545	Emperor geese (Anser canagicus) are exposed to a diversity of influenza A viruses, are infected during the non-breeding period and contribute to intercontinental viral dispersal	Ramey AM	Transbound Emerg Dis	2019	2019/05/12			10.1111/tbed.13226	Transbound Emerg Dis. 2019 Sep;66(5):1958-1970. doi: 10.1111/tbed.13226. Epub 2019 Jun 6.
Russia & Wildlife	0			30196122	Genetic evidence for the intercontinental movement of avian influenza viruses possessing North American-origin nonstructural gene allele B into South Korea	Cheon SH	Infect Genet Evol	2018	2018/09/10			10.1016/j.meegid.2018.09.001	Infect Genet Evol. 2018 Dec;66:18-25. doi: 10.1016/j.meegid.2018.09.001. Epub 2018 Sep 6.
Russia & Wildlife	0			25963340	Knockdown of different influenza A virus subtypes in cell culture by a single antisense oligodeoxyribonucleotide	Levina AS	Int J Antimicrob Agents	2015	2015/05/13			10.1016/j.ijantimicag.2015.03.004	Int J Antimicrob Agents. 2015 Jul;46(1):125-8. doi: 10.1016/j.ijantimicag.2015.03.004. Epub 2015 Apr 20.
Russia & Wildlife	0			21466927	H5N1 subtype highly pathogenic avian influenza virus isolated from healthy mallard captured in South Korea	Kim HR	Vet Microbiol	2011	2011/04/07			10.1016/j.vetmic.2011.03.004	Vet Microbiol. 2011 Aug 5;151(3-4):386-9. doi: 10.1016/j.vetmic.2011.03.004. Epub 2011 Mar 10.
Russia & Wildlife	0			26220479	Pleiotropic effects of amino acid substitutions in H5 hemagglutinin of influenza A escape mutants	Kaverin NV	Virus Res	2015	2015/07/30			10.1016/j.virusres.2015.07.016	Virus Res. 2015 Dec 2;210:81-9. doi: 10.1016/j.virusres.2015.07.016. Epub 2015 Jul 26.
Canada & Wildlife	1	1	1	32901574	Influenza A viruses remain infectious for more than seven months in northern wetlands of North America	Ramey AM	Proc Biol Sci	2020	2020/09/09	PMC7542776		10.1098/rspb.2020.1680	Proc Biol Sci. 2020 Sep 9;287(1934):20201680. doi: 10.1098/rspb.2020.1680. Epub 2020 Sep 9.
Russia & Wildlife	0			22113008	Reintroduction of H5N1 highly pathogenic avian influenza virus by migratory water birds, causing poultry outbreaks in the 2010-2011 winter season in Japan	Sakoda Y	J Gen Virol	2012	2011/11/25			10.1099/vir.0.037572-0	J Gen Virol. 2012 Mar;93(Pt 3):541-550. doi: 10.1099/vir.0.037572-0. Epub 2011 Nov 23.
Russia & Wildlife	0			29148396	Multiple Reassorted Viruses as Cause of Highly Pathogenic Avian Influenza A(H5N8) Virus Epidemic, the Netherlands, 2016	Beerens N	Emerg Infect Dis	2017	2017/11/18	PMC5708218		10.3201/eid2312.171062	Emerg Infect Dis. 2017 Dec;23(12):1974-1981. doi: 10.3201/eid2312.171062.
Alaska & Wildlife	1	1	1	32550610	Ecology of Influenza A Viruses in Wild Birds and Wetlands of Alaska	Ramey AM	Avian Dis	2020	2020/06/19			10.1637/0005-2086-64.2.109	Avian Dis. 2020 Jun;64(2):109-122. doi: 10.1637/0005-2086-64.2.109.
Russia & Wildlife	0			33806229	Intratumoral Virotherapy with Wild-Type Newcastle Disease Virus in Carcinoma Krebs-2 Cancer Model	Yurchenko KS	Viruses	2021	2021/04/03	PMC8067130		10.3390/v13040552	Viruses. 2021 Mar 25;13(4):552. doi: 10.3390/v13040552.
Russia & Wildlife	0			20335251	Geographical spread of highly pathogenic avian influenza virus H5N1 during the 2006 outbreak in Austria	Fink M	J Virol	2010	2010/03/26	PMC2876606		10.1128/JVI.01642-09	J Virol. 2010 Jun;84(11):5815-23. doi: 10.1128/JVI.01642-09. Epub 2010 Mar 24.
Alaska & Wildlife	1	1	1	34525758	Evidence for interannual persistence of infectious influenza A viruses in Alaska wetlands	Ramey AM	Sci Total Environ	2021	2021/09/16			10.1016/j.scitotenv.2021.150078	Sci Total Environ. 2021 Sep 3;803:150078. doi: 10.1016/j.scitotenv.2021.150078. Online ahead of print.
Alaska & Wildlife	1	1	1	29621333	Influenza A virus recovery, diversity, and intercontinental exchange: A multi-year assessment of wild bird sampling at Izembek National Wildlife Refuge, Alaska	Reeves AB	PLoS One	2018	2018/04/06	PMC5950690		10.1371/journal.pone.0195327	PLoS One. 2018 Apr 5;13(4):e0195327. doi: 10.1371/journal.pone.0195327. eCollection 2018.
Russia & Wildlife	0			27309079	High Rates of Detection of Clade 2.3.4.4 Highly Pathogenic Avian Influenza H5 Viruses in Wild Birds in the Pacific Northwest During the Winter of 2014-15	Ip HS	Avian Dis	2016	2016/06/17			10.1637/11137-050815-Reg	Avian Dis. 2016 May;60(1 Suppl):354-8. doi: 10.1637/11137-050815-Reg.
Russia & Wildlife	0			31309743	Isolation of highly pathogenic H5N6 avian influenza virus in Southern Vietnam with genetic similarity to those infecting humans in China	Tsunekuni R	Transbound Emerg Dis	2019	2019/07/17			10.1111/tbed.13294	Transbound Emerg Dis. 2019 Nov;66(6):2209-2217. doi: 10.1111/tbed.13294. Epub 2019 Jul 30.
Russia & Wildlife	0			27586413	Effects of hemagglutinin amino acid substitutions in H9 influenza A virus escape mutants	Rudneva IA	Arch Virol	2016	2016/09/03			10.1007/s00705-016-3038-x	Arch Virol. 2016 Dec;161(12):3515-3520. doi: 10.1007/s00705-016-3038-x. Epub 2016 Sep 1.
Russia & Wildlife	0			25846491	Wild bird surveillance around outbreaks of highly pathogenic avian influenza A(H5N8) virus in the Netherlands, 2014, within the context of global flyways	Verhagen JH	Euro Surveill	2015	2015/04/08			10.2807/1560-7917.es2015.20.12.21069	Euro Surveill. 2015 Mar 26;20(12):21069. doi: 10.2807/1560-7917.es2015.20.12.21069.
Arctic & Wildlife	1	1	1	17541700	Using RRT-PCR analysis and virus isolation to determine the prevalence of avian influenza virus infections in ducks at Minto Flats State Game Refuge, Alaska, during August 2005	Runstadler JA	Arch Virol	2007	2007/06/02	PMC2538573	NIHMS54787	10.1007/s00705-007-0994-1	Arch Virol. 2007;152(10):1901-10. doi: 10.1007/s00705-007-0994-1. Epub 2007 Jun 1.
Arctic & Wildlife	1	1	1	26591451	The dynamics of avian influenza in Lesser Snow Geese: implications for annual and migratory infection patterns	Samuel MD	Ecol Appl	2015	2015/11/24			10.1890/14-1820.1	Ecol Appl. 2015 Oct;25(7):1851-9. doi: 10.1890/14-1820.1.
Russia & Wildlife	0			17722605	[Development of polymerase chain reaction-based test systems for influenza A virus isolation and typing]	Kireev DE	Vopr Virusol	2007	2007/08/29				Vopr Virusol. 2007 Jul-Aug;52(4):17-22.
Russia & Wildlife	0			21904849	Characterisation of a highly pathogenic H5N1 clade 2.3.2 influenza virus isolated from swans in Shanghai, China	Zhao G	Virus Genes	2012	2011/09/10			10.1007/s11262-011-0667-8	Virus Genes. 2012 Feb;44(1):55-62. doi: 10.1007/s11262-011-0667-8. Epub 2011 Sep 9.
Russia & Wildlife	0			18756811	[Interpretation of the epizootic outbreak among wild and domestic birds in the south of the European part of Russia in December 2007]	L'vov DK	Vopr Virusol	2008	2008/09/02				Vopr Virusol. 2008 Jul-Aug;53(4):18-23.
Siberia & Avian	1	1	0	23091712	Persistence of avian influenza viruses in various artificially frozen environmental water types	Shoham D	Influenza Res Treat	2012	2012/10/24	PMC3471417		10.1155/2012/912326	Influenza Res Treat. 2012;2012:912326. doi: 10.1155/2012/912326. Epub 2012 Oct 4.
Arctic & Wildlife	1	1	0	32070804	A review of pathogens in selected Baltic Sea indicator species	Sonne C	Environ Int	2020	2020/02/20			10.1016/j.envint.2020.105565	Environ Int. 2020 Apr;137:105565. doi: 10.1016/j.envint.2020.105565. Epub 2020 Feb 18.
Russia & Wildlife	0			9601502	Postreassortment changes in influenza A virus hemagglutinin restoring HA-NA functional match	Kaverin NV	Virology	1998	1998/05/28			10.1006/viro.1998.9119	Virology. 1998 May 10;244(2):315-21. doi: 10.1006/viro.1998.9119.
Russia & Wildlife	0			18389720	Molecular analysis of the first avian influenza H5N1 isolates from fowl in Romania	Oprişan G	Roum Arch Microbiol Immunol	2006	2008/04/09				Roum Arch Microbiol Immunol. 2006 Jul-Dec;65(3-4):79-82.
Arctic & Wildlife	1	1	1	28837606	Maintenance of influenza A viruses and antibody response in mallards (Anas platyrhynchos) sampled during the non-breeding season in Alaska	Spivey TJ	PLoS One	2017	2017/08/25	PMC5570339		10.1371/journal.pone.0183505	PLoS One. 2017 Aug 24;12(8):e0183505. doi: 10.1371/journal.pone.0183505. eCollection 2017.
Canada & Avian	1	1	0	32548133	Extraction and Detection of Avian Influenza Virus From Wetland Sediment Using Enrichment-Based Targeted Resequencing	Tindale LC	Front Vet Sci	2020	2020/06/18	PMC7273442		10.3389/fvets.2020.00301	Front Vet Sci. 2020 May 29;7:301. doi: 10.3389/fvets.2020.00301. eCollection 2020.
Russia & Wildlife	0			19946717	Readaptation of a low-virulence influenza H9 escape mutant in mice: the role of changes in hemagglutinin as revealed by site-specific mutagenesis	Ilyushina NA	Arch Virol	2010	2009/12/01	PMC3117582	NIHMS300134	10.1007/s00705-009-0535-1	Arch Virol. 2010;155(1):107-10. doi: 10.1007/s00705-009-0535-1. Epub 2009 Nov 28.
Russia & Wildlife	1	1	0	26341298	Bayesian Inference Reveals Host-Specific Contributions to the Epidemic Expansion of Influenza A H5N1	Trovão NS	Mol Biol Evol	2015	2015/09/06	PMC4831561		10.1093/molbev/msv185	Mol Biol Evol. 2015 Dec;32(12):3264-75. doi: 10.1093/molbev/msv185. Epub 2015 Sep 3.
Russia & Wildlife	0			9178466	Protective responses in mice to vaccination with multiply administered cold-adapted influenza vaccine reassortants and wild-type viruses	Romanova JR	Vaccine	1997	1997/04/01			10.1016/s0264-410x(96)00245-9	Vaccine. 1997 Apr-May;15(6-7):653-8. doi: 10.1016/s0264-410x(96)00245-9.
Russia & Avian	1	1	1	18637721	Gene segment reassortment between American and Asian lineages of avian influenza virus from waterfowl in the Beringia area	Wahlgren J	Vector Borne Zoonotic Dis	2008	2008/07/22			10.1089/vbz.2007.0274	Vector Borne Zoonotic Dis. 2008 Dec;8(6):783-90. doi: 10.1089/vbz.2007.0274.
Russia & Wildlife	0			16981501	[The organization, control and coordination of measures for localization and liquidation of mass poultry loss and prevention of human diseases caused by avian flu in Ordynsk area of Novosibirsk region]	Shatalov BG	Zh Mikrobiol Epidemiol Immunobiol	2006	2006/09/20				Zh Mikrobiol Epidemiol Immunobiol. 2006 Jul-Aug;(5):83-9.
Sweden & Wildlife	1	1	0	17552093	Surveillance of influenza A virus in migratory waterfowl in northern Europe	Wallensten A	Emerg Infect Dis	2007	2007/06/08	PMC2725893		10.3201/eid1303.061130	Emerg Infect Dis. 2007 Mar;13(3):404-11. doi: 10.3201/eid1303.061130.
Canada & Avian	1	1	1	24171570	Evaluation of seabirds in Newfoundland and Labrador, Canada, as hosts of influenza A viruses	Wille M	J Wildl Dis	2014	2013/11/01			10.7589/2012-10-247	J Wildl Dis. 2014 Jan;50(1):98-103. doi: 10.7589/2012-10-247. Epub 2013 Oct 25.
Sweden & Wildlife	1	1	0	30373662	Alternate routes of influenza A virus infection in Mallard (Anas platyrhynchos)	Wille M	Vet Res	2018	2018/10/31	PMC6206871		10.1186/s13567-018-0604-0	Vet Res. 2018 Oct 29;49(1):110. doi: 10.1186/s13567-018-0604-0.
Arctic & Wildlife	1	1	0	23472177	High seroprevalence of antibodies to avian influenza viruses among wild waterfowl in Alaska: implications for surveillance	Wilson HM	PLoS One	2013	2013/03/09	PMC3589273		10.1371/journal.pone.0058308	PLoS One. 2013;8(3):e58308. doi: 10.1371/journal.pone.0058308. Epub 2013 Mar 5.
Russia & Wildlife	0			16320663	[Avian influenza H5NI in Europe: little risk as yet to health in the Netherlands]	Timen A	Ned Tijdschr Geneeskd	2005	2005/12/03				Ned Tijdschr Geneeskd. 2005 Nov 12;149(46):2547-9.
Arctic & Avian	1	1	1	17035314	Evidence of influenza a virus RNA in siberian lake ice	Zhang G	J Virol	2006	2006/10/13	PMC1676296		10.1128/JVI.00986-06	J Virol. 2006 Dec;80(24):12229-35. doi: 10.1128/JVI.00986-06. Epub 2006 Oct 11.
Canada & Avian	1	1	0	31406229	Semiaquatic mammals might be intermediate hosts to spread avian influenza viruses from avian to human	Zhao P	Sci Rep	2019	2019/08/14	PMC6690891		10.1038/s41598-019-48255-5	Sci Rep. 2019 Aug 12;9(1):11641. doi: 10.1038/s41598-019-48255-5.
Russia & Wildlife	0			16981502	[Epizootia of the avian flu among the wild waterfowl in Sargatsk of Omsk region in 2005]	Erofeev IuV	Zh Mikrobiol Epidemiol Immunobiol	2006	2006/09/20				Zh Mikrobiol Epidemiol Immunobiol. 2006 Jul-Aug;(5):90-3.
Sweden & Avian	1	1	0	25425511	Avian influenza A(H10N7) virus involvement in mass mortality of harbour seals (Phoca vitulina) in Sweden, March through October 2014	Zohari S	Euro Surveill	2014	2014/11/27			10.2807/1560-7917.es2014.19.46.20967	Euro Surveill. 2014 Nov 20;19(46):20967. doi: 10.2807/1560-7917.es2014.19.46.20967.
Russia & Wildlife	0			16826754	[The 2003 results of monitoring of influenza A virus in the populations of wild birds in the south of Western Siberia]	Razumova IuV	Vopr Virusol	2006	2006/07/11				Vopr Virusol. 2006 May-Jun;51(3):32-7.
Russia & Wildlife	0			19236725	A unique influenza A (H5N1) virus causing a focal poultry outbreak in 2007 in Manipur, India	Mishra AC	Virol J	2009	2009/02/25	PMC2654876		10.1186/1743-422X-6-26	Virol J. 2009 Feb 24;6:26. doi: 10.1186/1743-422X-6-26.
Russia & Wildlife	0			16104520	[Genetic variety of influenza A virus in the populations of wild birds in the south of Western Siberia]	Razumova IuV	Vopr Virusol	2005	2005/08/18				Vopr Virusol. 2005 Jul-Aug;50(4):31-5.
Russia & Wildlife	0			6455856	[Isolation of influenza A viruses with a new antigenic formula from wild birds]	Votiakov VI	Vopr Virusol	1981	1981/03/01				Vopr Virusol. 1981 Mar-Apr;(2):141-5.
Canada & Wildlife	1	0		20521692	Studying possible cross-protection of Canada geese preexposed to North American low pathogenicity avian influenza virus strains (H3N8, H4N6, and H5N2) against an H5N1 highly pathogenic avian influenza challenge	Berhane Y	Avian Dis	2010	2010/06/05			10.1637/8841-040309-Reg.1	Avian Dis. 2010 Mar;54(1 Suppl):548-54. doi: 10.1637/8841-040309-Reg.1.
Russia & Wildlife	0			16826750	[Highly pathogenic influenza A/H5N1 virus-caused epizooty among mute swans (Cygnus olor) in the lower estuary of the Volga River (November 2005)]	L'vov DK	Vopr Virusol	2006	2006/07/11				Vopr Virusol. 2006 May-Jun;51(3):10-6.
Russia & Wildlife	1	1	1	17283613	Anatidae migration in the western Palearctic and spread of highly pathogenic avian influenza H5NI virus	Gilbert M	Emerg Infect Dis	2006	2007/02/08	PMC3372333		10.3201/eid1211.060223	Emerg Infect Dis. 2006 Nov;12(11):1650-6. doi: 10.3201/eid1211.060223.
Russia & Wildlife	0			16981503	[Organization of sanitary and epidemiological measures to protect the Omsk region involved in epizootia of avian flu]	Erofeev IuV	Zh Mikrobiol Epidemiol Immunobiol	2006	2006/09/20				Zh Mikrobiol Epidemiol Immunobiol. 2006 Jul-Aug;(5):94-6.
Russia & Wildlife	0			16981505	[Epizootological and epidemiological features of the avian flu outbreak in the Chelyabinsk region in season 2005]	Semenov AI	Zh Mikrobiol Epidemiol Immunobiol	2006	2006/09/20				Zh Mikrobiol Epidemiol Immunobiol. 2006 Jul-Aug;(5):99-101.
Russia & Avian	0			27916476	Genesis, Evolution and Prevalence of H5N6 Avian Influenza Viruses in China	Bi Y	Cell Host Microbe	2016	2016/12/06			10.1016/j.chom.2016.10.022	Cell Host Microbe. 2016 Dec 14;20(6):810-821. doi: 10.1016/j.chom.2016.10.022. Epub 2016 Dec 1.
Iceland & Wildlife	1	0		30996092	Aerosol Transmission of Gull-Origin Iceland Subtype H10N7 Influenza A Virus in Ferrets	Guan M	J Virol	2019	2019/04/19	PMC6580963		10.1128/JVI.00282-19	J Virol. 2019 Jun 14;93(13):e00282-19. doi: 10.1128/JVI.00282-19. Print 2019 Jul 1.
Alaska & Wildlife	1	0		21668687	Experimental challenge and pathology of highly pathogenic avian influenza virus H5N1 in dunlin (Calidris alpina), an intercontinental migrant shorebird species	Hall JS	Influenza Other Respir Viruses	2011	2011/06/15	PMC4942049		10.1111/j.1750-2659.2011.00238.x	Influenza Other Respir Viruses. 2011 Sep;5(5):365-72. doi: 10.1111/j.1750-2659.2011.00238.x. Epub 2011 Mar 15.
Canada & Wildlife	1	0		17997603	Influenza in migratory birds and evidence of limited intercontinental virus exchange	Krauss S	PLoS Pathog	2007	2007/11/14	PMC2065878		10.1371/journal.ppat.0030167	PLoS Pathog. 2007 Nov;3(11):e167. doi: 10.1371/journal.ppat.0030167.
Alaska & Avian	1	1	0	23778609	Genomic analysis of avian influenza viruses from waterfowl in western Alaska, USA	Reeves AB	J Wildl Dis	2013	2013/06/20			10.7589/2012-04-108	J Wildl Dis. 2013 Jul;49(3):600-10. doi: 10.7589/2012-04-108.
Russia & Avian	0			21802447	Aprotinin and similar protease inhibitors as drugs against influenza	Zhirnov OP	Antiviral Res	2011	2011/08/02			10.1016/j.antiviral.2011.07.014	Antiviral Res. 2011 Oct;92(1):27-36. doi: 10.1016/j.antiviral.2011.07.014. Epub 2011 Jul 23.
Finland & Avian	1	0		23412765	Detection method for avian influenza viruses in water	Rönnqvist M	Food Environ Virol	2012	2013/02/16			10.1007/s12560-011-9075-4	Food Environ Virol. 2012 Mar;4(1):26-33. doi: 10.1007/s12560-011-9075-4. Epub 2011 Dec 22.
Russia & Avian	0			33920551	Biological Properties and Genetic Characterization of Novel Low Pathogenic H7N3 Avian Influenza Viruses Isolated from Mallard Ducks in the Caspian Region, Dagestan, Russia	Gulyaeva M	Microorganisms	2021	2021/04/30	PMC8072542		10.3390/microorganisms9040864	Microorganisms. 2021 Apr 17;9(4):864. doi: 10.3390/microorganisms9040864.
Russia & Avian	0			31200111	Updated unified phylogenetic classification system and revised nomenclature for Newcastle disease virus	Dimitrov KM	Infect Genet Evol	2019	2019/06/15	PMC6876278		10.1016/j.meegid.2019.103917	Infect Genet Evol. 2019 Oct;74:103917. doi: 10.1016/j.meegid.2019.103917. Epub 2019 Jun 11.
Russia & Avian	0			30261071	Inactivation of human and avian influenza viruses by potassium oleate of natural soap component through exothermic interaction	Kawahara T	PLoS One	2018	2018/09/28	PMC6160177		10.1371/journal.pone.0204908	PLoS One. 2018 Sep 27;13(9):e0204908. doi: 10.1371/journal.pone.0204908. eCollection 2018.
Russia & Avian	0			31024736	Co-circulation of genetically distinct highly pathogenic avian influenza A clade 2.3.4.4 (H5N6) viruses in wild waterfowl and poultry in Europe and East Asia, 2017-18	Poen MJ	Virus Evol	2019	2019/04/27	PMC6476160		10.1093/ve/vez004	Virus Evol. 2019 Apr 22;5(1):vez004. doi: 10.1093/ve/vez004. eCollection 2019 Jan.
Russia & Avian	0			31155415	Safety and immunogenicity of a replication-deficient H5N1 influenza virus vaccine lacking NS1	Nicolodi C	Vaccine	2019	2019/06/04			10.1016/j.vaccine.2019.05.013	Vaccine. 2019 Jun 19;37(28):3722-3729. doi: 10.1016/j.vaccine.2019.05.013. Epub 2019 May 30.
Russia & Avian	0			21449720	Antibody-binding epitope differences in the nucleoprotein of avian and mammalian influenza A viruses	Varich NL	Viral Immunol	2011	2011/04/01			10.1089/vim.2010.0088	Viral Immunol. 2011 Apr;24(2):101-7. doi: 10.1089/vim.2010.0088.
Russia & Avian	0			34065291	Avian Influenza in Wild Birds and Poultry: Dissemination Pathways, Monitoring Methods, and Virus Ecology	Blagodatski A	Pathogens	2021	2021/06/02	PMC8161317		10.3390/pathogens10050630	Pathogens. 2021 May 20;10(5):630. doi: 10.3390/pathogens10050630.
Russia & Avian	1	0		22494627	Infection of chickens caused by avian influenza virus A/H5N1 delivered by aerosol and other routes	Sergeev AA	Transbound Emerg Dis	2013	2012/04/13			10.1111/j.1865-1682.2012.01329.x	Transbound Emerg Dis. 2013 Apr;60(2):159-65. doi: 10.1111/j.1865-1682.2012.01329.x. Epub 2012 Apr 11.
Russia & Avian	0			29487846	Expression and Immunogenicity of M2e Peptide of Avian Influenza Virus H5N1 Fused to Ricin Toxin B Chain Produced in Duckweed Plants	Firsov A	Front Chem	2018	2018/03/01	PMC5816751		10.3389/fchem.2018.00022	Front Chem. 2018 Feb 13;6:22. doi: 10.3389/fchem.2018.00022. eCollection 2018.
Russia & Avian	0			29377916	Vaccination potential of B and T epitope-enriched NP and M2 against Influenza A viruses from different clades and hosts	Tutykhina I	PLoS One	2018	2018/01/30	PMC5788337		10.1371/journal.pone.0191574	PLoS One. 2018 Jan 29;13(1):e0191574. doi: 10.1371/journal.pone.0191574. eCollection 2018.
Russia & Wildlife	1	0		18041224	[Complex environmental and virological monitoring in the Primorye Territory in 2003-2006]	Shchelkanov MIu	Vopr Virusol	2007	2007/11/29				Vopr Virusol. 2007 Sep-Oct;52(5):37-48.
Russia & Avian	1	1	0	28542340	No evidence that migratory geese disperse avian influenza viruses from breeding to wintering ground	Yin S	PLoS One	2017	2017/05/26	PMC5436700		10.1371/journal.pone.0177790	PLoS One. 2017 May 18;12(5):e0177790. doi: 10.1371/journal.pone.0177790. eCollection 2017.
Russia & Wildlife	1	0		17494548	Summary of avian influenza activity in Europe, Asia, Africa, and Australasia, 2002-2006	Alexander DJ	Avian Dis	2007	2007/05/15			10.1637/7602-041306R.1	Avian Dis. 2007 Mar;51(1 Suppl):161-6. doi: 10.1637/7602-041306R.1.
Russia & Avian	0			29290844	Live Attenuated Reassortant Vaccines Based on A/Leningrad/134/17/57 Master Donor Virus Against H5 Avian Influenza	Kiseleva I	Open Microbiol J	2017	2018/01/02	PMC5737031		10.2174/1874285801711010316	Open Microbiol J. 2017 Nov 30;11:316-329. doi: 10.2174/1874285801711010316. eCollection 2017.
Russia & Avian	0			18661232	Adjustment of receptor-binding and neuraminidase substrate specificities in avian-human reassortant influenza viruses	Shtyrya Y	Glycoconj J	2009	2008/07/29			10.1007/s10719-008-9169-x	Glycoconj J. 2009 Jan;26(1):99-109. doi: 10.1007/s10719-008-9169-x. Epub 2008 Jul 26.
Russia & Avian	0			26413881	Will there ever be a new influenza pandemic and are we prepared?	Rudenko L	Vaccine	2015	2015/09/29			10.1016/j.vaccine.2015.08.045	Vaccine. 2015 Dec 8;33(49):7037-40. doi: 10.1016/j.vaccine.2015.08.045. Epub 2015 Sep 26.
Russia & Avian	0			19635509	Phenotypic, genetic, and phylogeographical characterization of avian influenza virus subtype H5N2 isolated from northern pintail (Anas acuta) in Japan	Jahangir A	Virus Res	2009	2009/07/29			10.1016/j.virusres.2009.07.015	Virus Res. 2009 Nov;145(2):329-33. doi: 10.1016/j.virusres.2009.07.015. Epub 2009 Jul 25.
Russia & Avian	0			20194696	Antiviral properties, metabolism, and pharmacokinetics of a novel azolo-1,2,4-triazine-derived inhibitor of influenza A and B virus replication	Karpenko I	Antimicrob Agents Chemother	2010	2010/03/03	PMC2863629		10.1128/AAC.01186-09	Antimicrob Agents Chemother. 2010 May;54(5):2017-22. doi: 10.1128/AAC.01186-09. Epub 2010 Mar 1.
Russia & Avian	0			26110587	Phylodynamics of H5N1 Highly Pathogenic Avian Influenza in Europe, 2005-2010: Potential for Molecular Surveillance of New Outbreaks	Alkhamis MA	Viruses	2015	2015/06/26	PMC4488740		10.3390/v7062773	Viruses. 2015 Jun 23;7(6):3310-28. doi: 10.3390/v7062773.
Russia & Wildlife	1	0		16328178	[How dangerous is avian flu for mankind?]	Allwinn R	Med Klin (Munich)	2005	2005/12/06			10.1007/s00063-005-1099-9	Med Klin (Munich). 2005 Nov 15;100(11):710-3. doi: 10.1007/s00063-005-1099-9.
Russia & Avian	0			10948982	Cross-protection and reassortment studies with avian H2 influenza viruses	Kaverin NV	Arch Virol	2000	2000/08/19			10.1007/s007050070109	Arch Virol. 2000;145(6):1059-66. doi: 10.1007/s007050070109.
Russia & Avian	0			17163191	[Various sides of influenza. Part II--epidemiology, influenza surveillance and prophylaxis]	Machała MK	Pol Merkur Lekarski	2006	2006/12/14				Pol Merkur Lekarski. 2006 Sep;21(123):277-85.
Russia & Avian	0			31623281	Ultrastructural Aspects of Photodynamic Inactivation of Highly Pathogenic Avian H5N8 Influenza Virus	Korneev D	Viruses	2019	2019/10/19	PMC6832225		10.3390/v11100955	Viruses. 2019 Oct 16;11(10):955. doi: 10.3390/v11100955.
Alaska & Avian	1	0		27691941	INFECTIOUS DISEASE AND TOXICOLOGICAL MONITORING OF STRANDED PACIFIC HARBOR SEALS (PHOCA VITULINA RICHARDSI) IN COOK INLET AS SURROGATES FOR MONITORING ENDANGERED BELUGAS (DELPHINAPTERUS LEUCAS)	Bauer KL	J Zoo Wildl Med	2016	2016/10/04			10.1638/2015-0147.1	J Zoo Wildl Med. 2016 Sep;47(3):770-780. doi: 10.1638/2015-0147.1.
Sweden & Wildlife	1	0		19737752	Pathology of natural highly pathogenic avian influenza H5N1 infection in wild tufted ducks (Aythya fuligula)	Bröjer C	J Vet Diagn Invest	2009	2009/09/10			10.1177/104063870902100501	J Vet Diagn Invest. 2009 Sep;21(5):579-87. doi: 10.1177/104063870902100501.
Russia & Avian	0			24533064	Assessment of human immune responses to H7 avian influenza virus of pandemic potential: results from a placebo-controlled, randomized double-blind phase I study of live attenuated H7N3 influenza vaccine	Rudenko L	PLoS One	2014	2014/02/18	PMC3922724		10.1371/journal.pone.0087962	PLoS One. 2014 Feb 12;9(2):e87962. doi: 10.1371/journal.pone.0087962. eCollection 2014.
Russia & Avian	0			28532182	Tackling a novel lethal virus: a focus on H7N9 vaccine development	Isakova-Sivak I	Expert Rev Vaccines	2017	2017/05/24			10.1080/14760584.2017.1333907	Expert Rev Vaccines. 2017 Jul;16(7):1-13. doi: 10.1080/14760584.2017.1333907. Epub 2017 May 26.
Arctic & Warming	1	0		27473191	Surveillance of infectious diseases in the Arctic	Bruce M	Public Health	2016	2016/07/31			10.1016/j.puhe.2016.06.014	Public Health. 2016 Aug;137:5-12. doi: 10.1016/j.puhe.2016.06.014. Epub 2016 Jul 26.
Russia & Avian	0			23988294	H7N3 live attenuated influenza vaccine has a potential to protect against new H7N9 avian influenza virus	Rudenko L	Vaccine	2013	2013/08/31			10.1016/j.vaccine.2013.08.040	Vaccine. 2013 Oct 1;31(42):4702-5. doi: 10.1016/j.vaccine.2013.08.040. Epub 2013 Aug 26.
Russia & Avian	0			9191848	Specification of receptor-binding phenotypes of influenza virus isolates from different hosts using synthetic sialylglycopolymers: non-egg-adapted human H1 and H3 influenza A and influenza B viruses share a common high binding affinity for 6'-sialyl(N-acetyllactosamine)	Gambaryan AS	Virology	1997	1997/06/09			10.1006/viro.1997.8572	Virology. 1997 Jun 9;232(2):345-50. doi: 10.1006/viro.1997.8572.
Russia & Avian	0			19546028	Structural and evolutionary characteristics of HA, NA, NS and M genes of clinical influenza A/H3N2 viruses passaged in human and canine cells	Zhirnov OP	J Clin Virol	2009	2009/06/24			10.1016/j.jcv.2009.05.030	J Clin Virol. 2009 Aug;45(4):322-33. doi: 10.1016/j.jcv.2009.05.030.
Russia & Avian	0			33167434	Anti-Influenza Activity of the Ribonuclease Binase: Cellular Targets Detected by Quantitative Proteomics	Ulyanova V	Int J Mol Sci	2020	2020/11/10	PMC7663932		10.3390/ijms21218294	Int J Mol Sci. 2020 Nov 5;21(21):8294. doi: 10.3390/ijms21218294.
Russia & Avian	0			33936018	Antigenic and Genetic Characterization of Swine Influenza Viruses Identified in the European Region of Russia, 2014-2020	Danilenko DM	Front Microbiol	2021	2021/05/03	PMC8081852		10.3389/fmicb.2021.662028	Front Microbiol. 2021 Apr 15;12:662028. doi: 10.3389/fmicb.2021.662028. eCollection 2021.
Russia & Avian	0			8257298	Influenza A virus reassortants with surface glycoprotein genes of the avian parent viruses: effects of HA and NA gene combinations on virus aggregation	Rudneva IA	Arch Virol	1993	1993/01/01			10.1007/BF01313781	Arch Virol. 1993;133(3-4):437-50. doi: 10.1007/BF01313781.
Russia & Avian	0			31816947	Characterization and Phylodynamics of Reassortant H12Nx Viruses in Northern Eurasia	Sharshov K	Microorganisms	2019	2019/12/11	PMC6956379		10.3390/microorganisms7120643	Microorganisms. 2019 Dec 3;7(12):643. doi: 10.3390/microorganisms7120643.
Russia & Avian	0			21951678	Comparative safety, immunogenicity, and efficacy of several anti-H5N1 influenza experimental vaccines in a mouse and chicken models (Testing of killed and live H5 vaccine)	Gambaryan AS	Influenza Other Respir Viruses	2012	2011/09/29	PMC4941668		10.1111/j.1750-2659.2011.00291.x	Influenza Other Respir Viruses. 2012 May;6(3):188-95. doi: 10.1111/j.1750-2659.2011.00291.x. Epub 2011 Sep 23.
Russia & Avian	0			14575133	Differences between influenza virus receptors on target cells of duck and chicken and receptor specificity of the 1997 H5N1 chicken and human influenza viruses from Hong Kong	Gambaryan AS	Avian Dis	2003	2003/10/25			10.1637/0005-2086-47.s3.1154	Avian Dis. 2003;47(3 Suppl):1154-60. doi: 10.1637/0005-2086-47.s3.1154.
Russia & Avian	0			16292596	Immunization with influenza A NP-expressing vaccinia virus recombinant protects mice against experimental infection with human and avian influenza viruses	Altstein AD	Arch Virol	2006	2005/11/18			10.1007/s00705-005-0676-9	Arch Virol. 2006 May;151(5):921-31. doi: 10.1007/s00705-005-0676-9. Epub 2005 Nov 15.
Russia & Avian	0			18459295	Surveillance of avian influenza viruses in Northern pintails (Anas acuta) in Tohoku District, Japan	Jahangir A	Avian Dis	2008	2008/05/08			10.1637/8035-062507-Reg	Avian Dis. 2008 Mar;52(1):49-53. doi: 10.1637/8035-062507-Reg.
Russia & Avian	0			18989641	The variable codons of H5N1 avian influenza A virus haemagglutinin genes	Shi W	Sci China C Life Sci	2008	2008/11/08			10.1007/s11427-008-0131-8	Sci China C Life Sci. 2008 Nov;51(11):987-93. doi: 10.1007/s11427-008-0131-8. Epub 2008 Nov 7.
Alaska & Wildlife	1	0		18828565	Viral and bacterial serology of six free-ranging bearded seals Erignathus barbatus	Calle PP	Dis Aquat Organ	2008	2008/10/03			10.3354/dao01927	Dis Aquat Organ. 2008 Aug 19;81(1):77-80. doi: 10.3354/dao01927.
Russia & Avian	0			18789611	Molecular and phylogenetic analysis of the H5N1 avian influenza virus caused the first highly pathogenic avian influenza outbreak in poultry in the Czech Republic in 2007	Nagy A	Vet Microbiol	2009	2008/09/16			10.1016/j.vetmic.2008.07.013	Vet Microbiol. 2009 Jan 13;133(3):257-63. doi: 10.1016/j.vetmic.2008.07.013. Epub 2008 Jul 30.
Russia & Avian	0			28533093	Safety and immunogenicity of a live attenuated influenza H5 candidate vaccine strain A/17/turkey/Turkey/05/133 H5N2 and its priming effects for potential pre-pandemic use: a randomised, double-blind, placebo-controlled trial	Pitisuttithum P	Lancet Infect Dis	2017	2017/05/24	PMC5522535		10.1016/S1473-3099(17)30240-2	Lancet Infect Dis. 2017 Aug;17(8):833-842. doi: 10.1016/S1473-3099(17)30240-2. Epub 2017 May 19.
Russia & Avian	0			30633245	[Three Mutations in the Stalk Region of Hemagglutinin Affect the pH of Fusion and Pathogenicity of H5N1 Influenza Virus]	Lomakina NF	Mol Biol (Mosk)	2018	2019/01/12			10.1134/S0026898418060125	Mol Biol (Mosk). 2018 Nov-Dec;52(6):1029-1037. doi: 10.1134/S0026898418060125.
Russia & Avian	0			34141450	Genomic evolution, transmission dynamics, and pathogenicity of avian influenza A (H5N8) viruses emerging in China, 2020	Zhang J	Virus Evol	2021	2021/06/18	PMC8206605		10.1093/ve/veab046	Virus Evol. 2021 May 6;7(1):veab046. doi: 10.1093/ve/veab046. eCollection 2021 Jan.
Russia & Avian	0			18646456	Epidemiological findings of outbreaks of disease caused by highly pathogenic H5N1 avian influenza virus in poultry in Egypt during 2006	Aly MM	Avian Dis	2008	2008/07/24			10.1637/8166-103007-Reg.1	Avian Dis. 2008 Jun;52(2):269-77. doi: 10.1637/8166-103007-Reg.1.
Russia & Avian	0			32316760	Molecular characterisation and phylogenetic analysis of Marek's disease virus in Turkish layer chickens	Yilmaz A	Br Poult Sci	2020	2020/04/23			10.1080/00071668.2020.1758301	Br Poult Sci. 2020 Oct;61(5):523-530. doi: 10.1080/00071668.2020.1758301. Epub 2020 May 18.
Russia & Wildlife	1	0		24652313	Risks of avian influenza transmission in areas of intensive free-ranging duck production with wild waterfowl	Cappelle J	Ecohealth	2014	2014/03/22	PMC4047217	NIHMS578079	10.1007/s10393-014-0914-2	Ecohealth. 2014;11(1):109-19. doi: 10.1007/s10393-014-0914-2. Epub 2014 Mar 21.
Russia & Avian	0			19069786	[Monoclonal antibodies to highly pathogenic avian influenza A(H5N1) strain isolated in the Russian Federation: development and properties]	Kushch AA	Vopr Virusol	2008	2008/12/17				Vopr Virusol. 2008 Sep-Oct;53(5):9-14.
Russia & Avian	0			22536424	Disease dynamics and bird migration--linking mallards Anas platyrhynchos and subtype diversity of the influenza A virus in time and space	Gunnarsson G	PLoS One	2012	2012/04/27	PMC3335010		10.1371/journal.pone.0035679	PLoS One. 2012;7(4):e35679. doi: 10.1371/journal.pone.0035679. Epub 2012 Apr 20.
Russia & Avian	0			30328579	Characterization of Avian-like Influenza A (H4N6) Virus Isolated from Caspian Seal in 2012	Gulyaeva M	Virol Sin	2018	2018/10/18	PMC6235759		10.1007/s12250-018-0053-y	Virol Sin. 2018 Oct;33(5):449-452. doi: 10.1007/s12250-018-0053-y. Epub 2018 Oct 17.
Russia & Avian	0			25555687	Pandemic preparedness with live attenuated influenza vaccines based on A/Leningrad/134/17/57 master donor virus	Rudenko L	Expert Rev Vaccines	2015	2015/01/04			10.1586/14760584.2015.979159	Expert Rev Vaccines. 2015 Mar;14(3):395-412. doi: 10.1586/14760584.2015.979159. Epub 2015 Jan 2.
Russia & Avian	0			15996787	Receptor-binding properties of swine influenza viruses isolated and propagated in MDCK cells	Gambaryan AS	Virus Res	2005	2005/07/06			10.1016/j.virusres.2005.05.005	Virus Res. 2005 Dec;114(1-2):15-22. doi: 10.1016/j.virusres.2005.05.005. Epub 2005 Jul 5.
Russia & Avian	0			34142650	Isolation of clade 2.3.4.4b A(H5N8), a highly pathogenic avian influenza virus, from a worker during an outbreak on a poultry farm, Russia, December 2020	Pyankova OG	Euro Surveill	2021	2021/06/18	PMC8212591		10.2807/1560-7917.ES.2021.26.24.2100439	Euro Surveill. 2021 Jun;26(24):2100439. doi: 10.2807/1560-7917.ES.2021.26.24.2100439.
Russia & Avian	0			16395019	Avian influenza: poised to launch a pandemic?	Sheff B	Nursing	2006	2006/01/06			10.1097/00152193-200601000-00041	Nursing. 2006 Jan;36(1):51-3. doi: 10.1097/00152193-200601000-00041.
Russia & Avian	0			26796670	H7N9 Live Attenuated Influenza Vaccine Is Highly Immunogenic, Prevents Virus Replication, and Protects Against Severe Bronchopneumonia in Ferrets	de Jonge J	Mol Ther	2016	2016/01/23	PMC4881767		10.1038/mt.2016.23	Mol Ther. 2016 May;24(5):991-1002. doi: 10.1038/mt.2016.23. Epub 2016 Jan 22.
Russia & Avian	0			17087198	[Sanitary and epidemiological well-being: topical problems]	Onishchenko GG	Gig Sanit	2006	2006/11/08				Gig Sanit. 2006 Sep-Oct;(5):4-10.
Russia & Avian	0			19708549	[A/H13 and A/H16 influenza viruses: different lines of one precursors]	Iamnikova SS	Vopr Virusol	2009	2009/08/28				Vopr Virusol. 2009 Jul-Aug;54(4):10-8.
Russia & Avian	0			18234791	Phylogenetic evidence against evolutionary stasis and natural abiotic reservoirs of influenza A virus	Worobey M	J Virol	2008	2008/02/01	PMC2268457		10.1128/JVI.02207-07	J Virol. 2008 Apr;82(7):3769-74. doi: 10.1128/JVI.02207-07. Epub 2008 Jan 30.
Russia & Avian	0			25937448	Development of a candidate influenza vaccine based on virus-like particles displaying influenza M2e peptide into the immunodominant loop region of hepatitis B core antigen: Insertion of multiple copies of M2e increases immunogenicity and protective efficiency	Ravin NV	Vaccine	2015	2015/05/05			10.1016/j.vaccine.2015.04.066	Vaccine. 2015 Jun 26;33(29):3392-7. doi: 10.1016/j.vaccine.2015.04.066. Epub 2015 Apr 29.
Russia & Avian	0			11885926	Avian and human influenza a virus strains possess different intracellular nucleoprotein oligomerization efficiency	Prokudina EN	Acta Virol	2001	2002/03/12				Acta Virol. 2001;45(4):201-7.
Russia & Avian	0			30113030	[Mutations in Hemagglutinin and Polymerase Alter the Virulence of Pandemic A(H1N1) Influenza Virus]	Gambaryan AS	Mol Biol (Mosk)	2018	2018/08/17			10.1134/S0026898418040055	Mol Biol (Mosk). 2018 Jul-Aug;52(4):644-658. doi: 10.1134/S0026898418040055.
Russia & Avian	0			30388790	Two Live Attenuated Vaccines against Recent Low⁻and Highly Pathogenic H7N9 Influenza Viruses Are Safe and Immunogenic in Ferrets	Rudenko L	Vaccines (Basel)	2018	2018/11/04	PMC6313887		10.3390/vaccines6040074	Vaccines (Basel). 2018 Nov 1;6(4):74. doi: 10.3390/vaccines6040074.
Russia & Avian	0			32668259	CD4(+) T Cells Recognize Conserved Influenza A Epitopes through Shared Patterns of V-Gene Usage and Complementary Biochemical Features	Greenshields-Watson A	Cell Rep	2020	2020/07/16	PMC7370177		10.1016/j.celrep.2020.107885	Cell Rep. 2020 Jul 14;32(2):107885. doi: 10.1016/j.celrep.2020.107885.
Russia & Avian	0			24839173	Molecular characterization and phylogenetics of a reassortant H13N8 influenza virus isolated from gulls in Mongolia	Sharshov K	Virus Genes	2014	2014/05/20			10.1007/s11262-014-1083-7	Virus Genes. 2014 Oct;49(2):237-49. doi: 10.1007/s11262-014-1083-7. Epub 2014 May 18.
Russia & Avian	0			15780877	Receptor specificity of influenza viruses from birds and mammals: new data on involvement of the inner fragments of the carbohydrate chain	Gambaryan A	Virology	2005	2005/03/23			10.1016/j.virol.2005.02.003	Virology. 2005 Apr 10;334(2):276-83. doi: 10.1016/j.virol.2005.02.003.
Russia & Avian	0			17294090	Effect of gene constellation and postreassortment amino acid change on the phenotypic features of H5 influenza virus reassortants	Rudneva IA	Arch Virol	2007	2007/02/13			10.1007/s00705-006-0931-8	Arch Virol. 2007;152(6):1139-45. doi: 10.1007/s00705-006-0931-8. Epub 2007 Feb 9.
Russia & Avian	0			19453417	Oligonucleotide microchip for subtyping of influenza A virus	Fesenko EE	Influenza Other Respir Viruses	2007	2009/05/21	PMC4941880		10.1111/j.1750-2659.2007.00018.x	Influenza Other Respir Viruses. 2007 May;1(3):121-9. doi: 10.1111/j.1750-2659.2007.00018.x.
Russia & Avian	0			11003481	Prevention and treatment of bronchopneumonia in mice caused by mouse-adapted variant of avian H5N2 influenza A virus using monoclonal antibody against conserved epitope in the HA stem region	Smirnov YA	Arch Virol	2000	2000/09/26			10.1007/s007050070088	Arch Virol. 2000;145(8):1733-41. doi: 10.1007/s007050070088.
Russia & Avian	0			17882832	[Tetravaccine--new fundamental approach to prevention of influenza pandemic]	Onishchenko GG	Zh Mikrobiol Epidemiol Immunobiol	2007	2007/09/22				Zh Mikrobiol Epidemiol Immunobiol. 2007 Jul-Aug;(4):15-9.
Russia & Avian	0			19453396	Safety and immunogenicity of live attenuated influenza reassortant H5 vaccine (phase I-II clinical trials)	Rudenko L	Influenza Other Respir Viruses	2008	2009/05/21	PMC4634119		10.1111/j.1750-2659.2008.00064.x	Influenza Other Respir Viruses. 2008 Nov;2(6):203-9. doi: 10.1111/j.1750-2659.2008.00064.x.
Russia & Avian	0			24909717	Amino acid derivatives of adamantane carbocycle are capable of inhibiting replication of highly virulent avian influenza A/H5N1 virus	Deryabin PG	Bull Exp Biol Med	2014	2014/06/10			10.1007/s10517-014-2492-2	Bull Exp Biol Med. 2014 May;157(1):62-5. doi: 10.1007/s10517-014-2492-2. Epub 2014 Jun 10.
Russia & Avian	0			29783756	Pre-Clinical and Clinical Efficiency of Complexes of Oligoribonucleotides with D-Mannitol against Respiratory Viruses	Melnichuk N	Pharmaceutics	2018	2018/05/23	PMC6027485		10.3390/pharmaceutics10020059	Pharmaceutics. 2018 May 19;10(2):59. doi: 10.3390/pharmaceutics10020059.
Russia & Avian	0			17668635	No-Spa and Remantadin are the novel complex preparations that inhibit effectively reproduction of the avian influenza viruses	Zhilinskaya IN	Dokl Biol Sci	2007	2007/08/03			10.1134/s0012496607030234	Dokl Biol Sci. 2007 May-Jun;414:249-50. doi: 10.1134/s0012496607030234.
Russia & Avian	0			34284707	COVID-19: Myths and Reality	Kordyukova LV	Biochemistry (Mosc)	2021	2021/07/21	PMC8265000		10.1134/S0006297921070026	Biochemistry (Mosc). 2021 Jul;86(7):800-817. doi: 10.1134/S0006297921070026.
Russia & Avian	0			32168440	[Assessment of the antiviral activity of 2HCl*H-His-Rim compound compared to the anti-influenza drug Arbidol for influenza caused by A/duck/Novosibirsk/56/05 (H5N1) (Influenza A virus, Alphainfluenzavirus, Orthomyxoviridae).]	Deryabin PG	Vopr Virusol	2019	2020/03/14			10.36233/0507-4088-2019-64-6-268-273	Vopr Virusol. 2019;64(6):268-273. doi: 10.36233/0507-4088-2019-64-6-268-273.
Russia & Avian	0			17523423	[Preventive measure of massive spreading of influenza and acute respiratory viral infections]	Sergiev VP	Zh Mikrobiol Epidemiol Immunobiol	2007	2007/05/26				Zh Mikrobiol Epidemiol Immunobiol. 2007 Jan-Feb;(1):17-23.
Russia & Avian	0			24675275	Molecular mechanisms enhancing the proteome of influenza A viruses: an overview of recently discovered proteins	Vasin AV	Virus Res	2014	2014/03/29			10.1016/j.virusres.2014.03.015	Virus Res. 2014 Jun 24;185:53-63. doi: 10.1016/j.virusres.2014.03.015. Epub 2014 Mar 24.
Russia & Avian	0			33537341	Deletion of BST2 Cytoplasmic and Transmembrane N-Terminal Domains Results in SARS-CoV, SARS-CoV-2, and Influenza Virus Production Suppression in a Vero Cell Line	Dolskiy AA	Front Mol Biosci	2020	2021/02/04	PMC7847895		10.3389/fmolb.2020.616798	Front Mol Biosci. 2020 Dec 18;7:616798. doi: 10.3389/fmolb.2020.616798. eCollection 2020.
Russia & Avian	0			18507165	[Topical problems in the provision of the Russian Federation's population with sanitary-and-epidemiological well-being]	Onishchenko GG	Gig Sanit	2008	2008/05/30				Gig Sanit. 2008 Mar-Apr;(2):4-15.
Russia & Avian	0			31354812	Pathology of A(H5N8) (Clade 2.3.4.4) Virus in Experimentally Infected Chickens and Mice	Prokopyeva EA	Interdiscip Perspect Infect Dis	2019	2019/07/30	PMC6637675		10.1155/2019/4124865	Interdiscip Perspect Infect Dis. 2019 Jul 4;2019:4124865. doi: 10.1155/2019/4124865. eCollection 2019.
Russia & Avian	0			30014856	Receptor-binding properties of influenza viruses isolated from gulls	Gambaryan AS	Virology	2018	2018/07/18			10.1016/j.virol.2018.07.004	Virology. 2018 Sep;522:37-45. doi: 10.1016/j.virol.2018.07.004. Epub 2018 Jul 12.
Russia & Avian	0			29658084	Modeling of 3D Structure of Chimeric Constructs Based on Hemagglutinin of Influenza Virus and Immunogenic Epitopes of Streptococcus Agalactiae	Fedorova EA	Bull Exp Biol Med	2018	2018/04/17			10.1007/s10517-018-4071-4	Bull Exp Biol Med. 2018 Apr;164(6):743-748. doi: 10.1007/s10517-018-4071-4. Epub 2018 Apr 16.
Russia & Avian	0			16573204	[Classic fowl plague--a review]	Werner O	Berl Munch Tierarztl Wochenschr	2006	2006/04/01				Berl Munch Tierarztl Wochenschr. 2006 Mar-Apr;119(3-4):140-50.
Russia & Avian	0			32569556	Analysis of Glycosyl-Enzyme Intermediate Formation in the Catalytic Mechanism of Influenza Virus Neuraminidase Using Molecular Modeling	Kirilin EM	Biochemistry (Mosc)	2020	2020/06/23			10.1134/S0006297920040094	Biochemistry (Mosc). 2020 Apr;85(4):490-498. doi: 10.1134/S0006297920040094.
Russia & Avian	0			25548788	Comparative evaluation of effectiveness of IAVchip DNA microarray in influenza A diagnosis	Sultankulova KT	ScientificWorldJournal	2014	2014/12/31	PMC4274914		10.1155/2014/620580	ScientificWorldJournal. 2014;2014:620580. doi: 10.1155/2014/620580. Epub 2014 Nov 23.
Russia & Avian	0			17729447	[Sanitary and epidemiological well-being in children and adolescents: state-of-the-art and ways of solving the problem]	Onishchenko GG	Gig Sanit	2007	2007/08/31				Gig Sanit. 2007 Jul-Aug;(4):53-9.
Russia & Avian	0			22235423	Preventive efficacy of oxidized dextran and pathomorphological processes in mouse lungs in avian influenza A/H5N1	Potapova OV	Bull Exp Biol Med	2011	2012/01/12			10.1007/s10517-011-1229-8	Bull Exp Biol Med. 2011 Apr;150(6):707-10. doi: 10.1007/s10517-011-1229-8.
Russia & Avian	0			33933515	An influenza A(H5N8) virus isolated during an outbreak at a poultry farm in Russia in 2017 has an N294S substitution in the neuraminidase and shows reduced susceptibility to oseltamivir	Svyatchenko SV	Antiviral Res	2021	2021/05/02			10.1016/j.antiviral.2021.105079	Antiviral Res. 2021 Jul;191:105079. doi: 10.1016/j.antiviral.2021.105079. Epub 2021 Apr 29.
Russia & Avian	0			25799221	Protection against multiple influenza A virus strains induced by candidate recombinant vaccine based on heterologous M2e peptides linked to flagellin	Stepanova LA	PLoS One	2015	2015/03/24	PMC4370815		10.1371/journal.pone.0119520	PLoS One. 2015 Mar 23;10(3):e0119520. doi: 10.1371/journal.pone.0119520. eCollection 2015.
Russia & Avian	0			14575135	Differences between HA receptor-binding sites of avian influenza viruses isolated from Laridae and Anatidae	Yamnikova SS	Avian Dis	2003	2003/10/25			10.1637/0005-2086-47.s3.1164	Avian Dis. 2003;47(3 Suppl):1164-8. doi: 10.1637/0005-2086-47.s3.1164.
Russia & Avian	0			9658077	Molecular mechanisms of serum resistance of human influenza H3N2 virus and their involvement in virus adaptation in a new host	Matrosovich M	J Virol	1998	1998/07/11	PMC109785		10.1128/JVI.72.8.6373-6380.1998	J Virol. 1998 Aug;72(8):6373-80. doi: 10.1128/JVI.72.8.6373-6380.1998.
Russia & Avian	0			9749330	[Different patterns of molecular evolution of influenza A viruses in avian and human population]	Makarova KS	Genetika	1998	1998/09/28				Genetika. 1998 Jul;34(7):890-6.
Russia & Avian	0			34452449	Substitution Arg140Gly in Hemagglutinin Reduced the Virulence of Highly Pathogenic Avian Influenza Virus H7N1	Treshchalina A	Viruses	2021	2021/08/28	PMC8402889		10.3390/v13081584	Viruses. 2021 Aug 11;13(8):1584. doi: 10.3390/v13081584.
Russia & Avian	0			16125565	Can Russia cope with avian influenza?		Lancet	2005	2005/08/30			10.1016/S0140-6736(05)67148-6	Lancet. 2005 Aug 27-Sep 2;366(9487):689. doi: 10.1016/S0140-6736(05)67148-6.
Canada & Wildlife	1	0		19459279	Avian influenza infections in birds--a moving target	Capua I	Influenza Other Respir Viruses	2007	2009/05/23	PMC4634665		10.1111/j.1750-2659.2006.00004.x	Influenza Other Respir Viruses. 2007 Jan;1(1):11-8. doi: 10.1111/j.1750-2659.2006.00004.x.
Russia & Avian	0			31647170	Synthesis of Camphecene and Cytisine Conjugates Using Click Chemistry Methodology and Study of Their Antiviral Activity	Artyushin OI	Chem Biodivers	2019	2019/10/25			10.1002/cbdv.201900340	Chem Biodivers. 2019 Nov;16(11):e1900340. doi: 10.1002/cbdv.201900340. Epub 2019 Oct 29.
Russia & Avian	0			21786591	[Emerging and reemerging infections of Northern Eurasia: global implications]	L'vov DK	Vestn Ross Akad Med Nauk	2011	2011/07/27				Vestn Ross Akad Med Nauk. 2011;(5):5-12.
Russia & Avian	0			17672124	[Comparative clinical trial of vaccines against avian influenza]	Zverev VV	Zh Mikrobiol Epidemiol Immunobiol	2007	2007/08/04				Zh Mikrobiol Epidemiol Immunobiol. 2007 May-Jun;(3):10-6.
Russia & Avian	0			29633078	Antiviral activity of Embelia ribes Burm. f. against influenza virus in vitro	Hossan MS	Arch Virol	2018	2018/04/11			10.1007/s00705-018-3842-6	Arch Virol. 2018 Aug;163(8):2121-2131. doi: 10.1007/s00705-018-3842-6. Epub 2018 Apr 10.
Russia & Avian	0			33673708	The Functional Role of Loops and Flanking Sequences of G-Quadruplex Aptamer to the Hemagglutinin of Influenza a Virus	Bizyaeva AA	Int J Mol Sci	2021	2021/03/06	PMC7957560		10.3390/ijms22052409	Int J Mol Sci. 2021 Feb 27;22(5):2409. doi: 10.3390/ijms22052409.
Russia & Avian	0			25448100	Cross-protection against H7N9 influenza strains using a live-attenuated H7N3 virus vaccine	Carter DM	Vaccine	2015	2014/12/03			10.1016/j.vaccine.2014.11.008	Vaccine. 2015 Jan 1;33(1):108-16. doi: 10.1016/j.vaccine.2014.11.008. Epub 2014 Nov 18.
Russia & Avian	0			17214079	[The properties of the epidemic influenza viruses A and B strains circulating in Russia in the 2004-2005 epidemic season]	Ivanova VT	Vopr Virusol	2006	2007/01/12				Vopr Virusol. 2006 Nov-Dec;51(6):27-30.
Russia & Avian	0			33740120	Genetic analysis of genotype G57 H9N2 avian influenza virus isolate A/chicken/Tajikistan/2379/2018 recovered in Central Asia	Zinyakov NG	Arch Virol	2021	2021/03/19			10.1007/s00705-021-05011-3	Arch Virol. 2021 Jun;166(6):1591-1597. doi: 10.1007/s00705-021-05011-3. Epub 2021 Mar 19.
Russia & Avian	0			16732420	Isolation of avian influenza viruses from two different transhemispheric migratory shorebird species in Australia	Hurt AC	Arch Virol	2006	2006/05/30			10.1007/s00705-006-0784-1	Arch Virol. 2006 Nov;151(11):2301-9. doi: 10.1007/s00705-006-0784-1. Epub 2006 May 26.
Russia & Avian	0			20373998	Antigenic epitopes in the hemagglutinin of Qinghai-type influenza H5N1 virus	Rudneva IA	Viral Immunol	2010	2010/04/09			10.1089/vim.2009.0086	Viral Immunol. 2010 Apr;23(2):181-7. doi: 10.1089/vim.2009.0086.
Russia & Avian	0			32036809	Filamentous versus Spherical Morphology: A Case Study of the Recombinant A/WSN/33 (H1N1) Virus	Kordyukova LV	Microsc Microanal	2020	2020/02/11			10.1017/S1431927620000069	Microsc Microanal. 2020 Apr;26(2):297-309. doi: 10.1017/S1431927620000069.
Russia & Avian	0			15789269	Postreassortment changes in a model system: HA-NA adjustment in an H3N2 avian-human reassortant influenza virus	Ilyushina NA	Arch Virol	2005	2005/03/25			10.1007/s00705-005-0490-4	Arch Virol. 2005 Jul;150(7):1327-38. doi: 10.1007/s00705-005-0490-4. Epub 2005 Mar 24.
Russia & Avian	0			26673391	H7N9 live attenuated influenza vaccine in healthy adults: a randomised, double-blind, placebo-controlled, phase 1 trial	Rudenko L	Lancet Infect Dis	2016	2015/12/18	PMC5521248	EMS73221	10.1016/S1473-3099(15)00378-3	Lancet Infect Dis. 2016 Mar;16(3):303-10. doi: 10.1016/S1473-3099(15)00378-3. Epub 2015 Dec 8.
Russia & Avian	0			18318154	[The Saint-Petersburg summit of Group of Eight: the problems of infectious diseases and the ways of their solution]	Onishchenko GG	Vestn Ross Akad Med Nauk	2008	2008/03/06				Vestn Ross Akad Med Nauk. 2008;(1):35-41.
Canada & Wildlife	1	0		19276432	Avian influenza infection in birds: a challenge and opportunity for the poultry veterinarian	Capua I	Poult Sci	2009	2009/03/12			10.3382/ps.2008-00289	Poult Sci. 2009 Apr;88(4):842-6. doi: 10.3382/ps.2008-00289.
Polar & Avian	1	0		32214634	Molecular surveillance for avian influenza A virus in king penguins (Aptenodytes patagonicus)	Chang CM	Polar Biol	2009	2020/03/28	PMC7087602		10.1007/s00300-009-0587-4	Polar Biol. 2009;32(4):663. doi: 10.1007/s00300-009-0587-4. Epub 2009 Feb 6.
Russia & Avian	0			23803900	An inactivated, adjuvanted whole virion clade 2.2 H5N1 (A/Chicken/Astana/6/05) influenza vaccine is safe and immunogenic in a single dose in humans	Sansyzbay AR	Clin Vaccine Immunol	2013	2013/06/28	PMC3754517		10.1128/CVI.00096-13	Clin Vaccine Immunol. 2013 Aug;20(8):1314-9. doi: 10.1128/CVI.00096-13. Epub 2013 Jun 26.
Russia & Avian	0			15645379	Stability of intracellular influenza virus nucleocapsid protein oligomers	Prokudina EN	Arch Virol	2005	2005/01/13			10.1007/s00705-004-0425-5	Arch Virol. 2005 Apr;150(4):833-9. doi: 10.1007/s00705-004-0425-5. Epub 2005 Jan 13.
Russia & Avian	0			27206548	The influenza A virus NS genome segment displays lineage-specific patterns in predicted RNA secondary structure	Vasin AV	BMC Res Notes	2016	2016/05/22	PMC4875733		10.1186/s13104-016-2083-6	BMC Res Notes. 2016 May 20;9:279. doi: 10.1186/s13104-016-2083-6.
Russia & Avian	0			25976545	Development of a candidate influenza vaccine based on virus-like particles displaying influenza M2e peptide into the immunodominant region of hepatitis B core antigen: Broad protective efficacy of particles carrying four copies of M2e	Tsybalova LM	Vaccine	2015	2015/05/16			10.1016/j.vaccine.2015.04.073	Vaccine. 2015 Jun 26;33(29):3398-406. doi: 10.1016/j.vaccine.2015.04.073. Epub 2015 May 11.
Russia & Avian	0			9014015	Differences between original strains and their mouse-adapted variants of human (H1) and avian (H2) influenza A viruses in the reaction with cross-neutralizing monoclonal antibody recognizing conformational epitope	Lipatov AS	Acta Virol	1996	1996/09/01				Acta Virol. 1996 Sep;40(4):227-30.
Russia & Avian	0			17216139	Non-compact nucleocapsid protein multimers in influenza-virus-infected cells	Prokudina EN	Arch Virol	2007	2007/01/12			10.1007/s00705-006-0911-z	Arch Virol. 2007;152(5):981-8. doi: 10.1007/s00705-006-0911-z. Epub 2007 Jan 12.
Russia & Avian	0			9607093	Prevention and treatment of lethal influenza A virus bronchopneumonia in mice by monoclonal antibody against haemagglutinin stem region	Lipatov AS	Acta Virol	1997	1998/06/02				Acta Virol. 1997 Dec;41(6):337-40.
Russia & Avian	0			19513379	Pathogenesis of infectious disease of mice caused by H5N1 avian influenza virus	Evseenko VA	Bull Exp Biol Med	2008	2009/06/11			10.1007/s10517-009-0375-8	Bull Exp Biol Med. 2008 Dec;146(6):766-9. doi: 10.1007/s10517-009-0375-8.
Russia & Avian	0			12624943	[Functional interactions of the influenza virus glycoproteins]	Rudneva IA	Mol Biol (Mosk)	2003	2003/03/11				Mol Biol (Mosk). 2003 Jan-Feb;37(1):34-40.
Russia & Avian	0			17680329	Oligosaccharide specificity of influenza H1N1 virus neuraminidases	Mochalova L	Arch Virol	2007	2007/08/08			10.1007/s00705-007-1024-z	Arch Virol. 2007;152(11):2047-57. doi: 10.1007/s00705-007-1024-z. Epub 2007 Aug 6.
Russia & Avian	0			34209093	Universal Live-Attenuated Influenza Vaccine Candidates Expressing Multiple M2e Epitopes Protect Ferrets against a High-Dose Heterologous Virus Challenge	Mezhenskaya D	Viruses	2021	2021/07/02	PMC8310119		10.3390/v13071280	Viruses. 2021 Jun 30;13(7):1280. doi: 10.3390/v13071280.
Russia & Avian	0			28988534	Biochemical Variations in Cytolytic Activity of Ortho- and Paramyxoviruses in Human Lung Tumor Cell Culture	Zhirnov OP	Biochemistry (Mosc)	2017	2017/10/10			10.1134/S0006297917090085	Biochemistry (Mosc). 2017 Sep;82(9):1048-1054. doi: 10.1134/S0006297917090085.
Russia & Avian	0			17050041	Characterization of an influenza A H5N2 reassortant as a candidate for live-attenuated and inactivated vaccines against highly pathogenic H5N1 viruses with pandemic potential	Desheva JA	Vaccine	2006	2006/10/20			10.1016/j.vaccine.2006.06.023	Vaccine. 2006 Nov 17;24(47-48):6859-66. doi: 10.1016/j.vaccine.2006.06.023. Epub 2006 Jun 28.
Russia & Avian	0			24308582	H7N9: can H7N3 live-attenuated influenza vaccine be used at the early stage of the pandemic?	Rudenko L	Expert Rev Vaccines	2014	2013/12/07			10.1586/14760584.2014.864564	Expert Rev Vaccines. 2014 Jan;13(1):1-4. doi: 10.1586/14760584.2014.864564. Epub 2013 Nov 28.
Russia & Avian	0			16104521	[Effects of antiviral agents on the reproduction of avian influenza virus A/H5 isolated in Russia]	Fediakina IT	Vopr Virusol	2005	2005/08/18				Vopr Virusol. 2005 Jul-Aug;50(4):35-7.
Russia & Avian	0			9607078	Cross-protection of mice immunized with different influenza A (H2) strains and challenged with viruses of the same HA subtype	Govorkova EA	Acta Virol	1997	1998/06/02				Acta Virol. 1997 Oct;41(5):251-7.
Russia & Avian	0			16226289	Evolution of the receptor binding phenotype of influenza A (H5) viruses	Gambaryan A	Virology	2006	2005/10/18			10.1016/j.virol.2005.08.035	Virology. 2006 Jan 20;344(2):432-8. doi: 10.1016/j.virol.2005.08.035. Epub 2005 Oct 13.
Russia & Avian	0			22022970	Galectins promote the interaction of influenza virus with its target cell	Chernyy ES	Biochemistry (Mosc)	2011	2011/10/26			10.1134/S0006297911080128	Biochemistry (Mosc). 2011 Aug;76(8):958-67. doi: 10.1134/S0006297911080128.
Russia & Avian	0			8806539	Intracellular oligomerization of influenza virus nucleoprotein	Prokudina-Kantorovich EN	Virology	1996	1996/09/01			10.1006/viro.1996.0454	Virology. 1996 Sep 1;223(1):51-6. doi: 10.1006/viro.1996.0454.
Russia & Avian	0			26432909	Genetic stability of live attenuated vaccines against potentially pandemic influenza viruses	Kiseleva I	Vaccine	2015	2015/10/04			10.1016/j.vaccine.2015.09.050	Vaccine. 2015 Dec 8;33(49):7008-14. doi: 10.1016/j.vaccine.2015.09.050. Epub 2015 Oct 2.
Russia & Avian	0			34555124	Characterization of changes in the hemagglutinin that accompanied the emergence of H3N2/1968 pandemic influenza viruses	West J	PLoS Pathog	2021	2021/09/23	PMC8491938		10.1371/journal.ppat.1009566	PLoS Pathog. 2021 Sep 23;17(9):e1009566. doi: 10.1371/journal.ppat.1009566. eCollection 2021 Sep.
Russia & Avian	1	0		28930520	Molecular evolution of hemagglutinin gene of Influenza A virus	De A	Front Biosci (Schol Ed)	2018	2017/09/21			10.2741/s502	Front Biosci (Schol Ed). 2018 Jan 1;10:101-118. doi: 10.2741/s502.
Russia & Avian	0			18297235	Chitosan as an adjuvant for parenterally administered inactivated influenza vaccines	Ghendon Y	Arch Virol	2008	2008/02/26			10.1007/s00705-008-0047-4	Arch Virol. 2008;153(5):831-7. doi: 10.1007/s00705-008-0047-4. Epub 2008 Feb 23.
Russia & Avian	0			28274236	Isolation and genetic characterization of a novel 2.2.1.2a H5N1 virus from a vaccinated meat-turkeys flock in Egypt	Salaheldin AH	Virol J	2017	2017/03/10	PMC5343302		10.1186/s12985-017-0697-5	Virol J. 2017 Mar 9;14(1):48. doi: 10.1186/s12985-017-0697-5.
Russia & Avian	0			26697973	Assessment of immune responses to H5N1 inactivated influenza vaccine among individuals previously primed with H5N2 live attenuated influenza vaccine	Rudenko L	Hum Vaccin Immunother	2015	2015/12/25	PMC5054797		10.1080/21645515.2015.1069931	Hum Vaccin Immunother. 2015;11(12):2839-48. doi: 10.1080/21645515.2015.1069931.
Russia & Avian	0			33806156	Antibodies to Highly Pathogenic A/H5Nx (Clade 2.3.4.4) Influenza Viruses in the Sera of Vietnamese Residents	Ilyicheva T	Pathogens	2021	2021/04/03	PMC8064466		10.3390/pathogens10040394	Pathogens. 2021 Mar 25;10(4):394. doi: 10.3390/pathogens10040394.
Canada & Bird	1	0		29922681	Geographical and Historical Patterns in the Emergences of Novel Highly Pathogenic Avian Influenza (HPAI) H5 and H7 Viruses in Poultry	Dhingra MS	Front Vet Sci	2018	2018/06/21	PMC5996087		10.3389/fvets.2018.00084	Front Vet Sci. 2018 Jun 5;5:84. doi: 10.3389/fvets.2018.00084. eCollection 2018.
Russia & Avian	0			9705915	Differences in the biological phenotype of low-yielding (L) and high-yielding (H) variants of swine influenza virus A/NJ/11/76 are associated with their different receptor-binding activity	Gambaryan AS	Virology	1998	1998/08/26			10.1006/viro.1998.9274	Virology. 1998 Aug 1;247(2):223-31. doi: 10.1006/viro.1998.9274.
Russia & Avian	0			29574336	Broadly protective anti-hemagglutinin stalk antibodies induced by live attenuated influenza vaccine expressing chimeric hemagglutinin	Isakova-Sivak I	Virology	2018	2018/03/26			10.1016/j.virol.2018.03.013	Virology. 2018 May;518:313-323. doi: 10.1016/j.virol.2018.03.013. Epub 2018 Mar 22.
Russia & Avian	0			10559331	Caspase-dependent N-terminal cleavage of influenza virus nucleocapsid protein in infected cells	Zhirnov OP	J Virol	1999	1999/11/13	PMC113068		10.1128/JVI.73.12.10158-10163.1999	J Virol. 1999 Dec;73(12):10158-63. doi: 10.1128/JVI.73.12.10158-10163.1999.
Arctic & Wildlife	1	0		20621205	Mx gene diversity and influenza association among five wild dabbling duck species (Anas spp.) in Alaska	Dillon D	Infect Genet Evol	2010	2010/07/13	PMC2962922	NIHMS235261	10.1016/j.meegid.2010.07.004	Infect Genet Evol. 2010 Oct;10(7):1085-93. doi: 10.1016/j.meegid.2010.07.004. Epub 2010 Jul 16.
Russia & Avian	0			23274623	Formatted single-domain antibodies can protect mice against infection with influenza virus (H5N2)	Tillib SV	Antiviral Res	2013	2013/01/01			10.1016/j.antiviral.2012.12.014	Antiviral Res. 2013 Mar;97(3):245-54. doi: 10.1016/j.antiviral.2012.12.014. Epub 2012 Dec 25.
Russia & Avian	0			27216929	Taxonomy of the order Mononegavirales: update 2016	Afonso CL	Arch Virol	2016	2016/05/25	PMC4947412	NIHMS792850	10.1007/s00705-016-2880-1	Arch Virol. 2016 Aug;161(8):2351-60. doi: 10.1007/s00705-016-2880-1. Epub 2016 May 23.
Russia & Avian	0			24454472	Immunomorphologic manifestations in mice liver infected with influenza A/H5N1, A/goose/Krasnoozerskoye/627/05 strain	Potapova OV	Clin Dev Immunol	2013	2014/01/24	PMC3886489		10.1155/2013/342686	Clin Dev Immunol. 2013;2013:342686. doi: 10.1155/2013/342686. Epub 2013 Dec 23.
Russia & Avian	0			18225506	[Important issues of biological safety]	Onishchenko GG	Vestn Ross Akad Med Nauk	2007	2008/01/30				Vestn Ross Akad Med Nauk. 2007;(12):40-4.
Russia & Wildlife	1	0		16981508	[Some aspects of avian flu in the Tyumen region]	Dubinina OA	Zh Mikrobiol Epidemiol Immunobiol	2006	2006/09/20				Zh Mikrobiol Epidemiol Immunobiol. 2006 Jul-Aug;(5):106-7.
Russia & Avian	0			24210119	Pleiotropic effects of hemagglutinin amino acid substitutions of H5 influenza escape mutants	Rudneva IA	Virology	2013	2013/11/12			10.1016/j.virol.2013.09.013	Virology. 2013 Dec;447(1-2):233-9. doi: 10.1016/j.virol.2013.09.013. Epub 2013 Oct 4.
Russia & Avian	0			28389807	Taxonomy of the order Mononegavirales: update 2017	Amarasinghe GK	Arch Virol	2017	2017/04/09	PMC5831667	NIHMS943781	10.1007/s00705-017-3311-7	Arch Virol. 2017 Aug;162(8):2493-2504. doi: 10.1007/s00705-017-3311-7. Epub 2017 Apr 7.
Russia & Avian	0			9705910	Effects of host-dependent glycosylation of hemagglutinin on receptor-binding properties on H1N1 human influenza A virus grown in MDCK cells and in embryonated eggs	Gambaryan AS	Virology	1998	1998/08/26			10.1006/viro.1998.9224	Virology. 1998 Aug 1;247(2):170-7. doi: 10.1006/viro.1998.9224.
Russia & Avian	0			34505569	Authors' response: Sequencing bias for residue 28 of the neuraminidase of the recent highly pathogenic avian influenza virus A(H5N8)	Susloparov IM	Euro Surveill	2021	2021/09/10	PMC8431994		10.2807/1560-7917.ES.2021.26.36.2100871	Euro Surveill. 2021 Sep;26(36):2100871. doi: 10.2807/1560-7917.ES.2021.26.36.2100871.
Russia & Avian	0			34278962	Effects of in ovo feeding of vitamin E or vitamin C on egg hatchability, performance, carcass traits and immunity in broiler chickens	Ghane F	Anim Biotechnol	2021	2021/07/19			10.1080/10495398.2021.1950744	Anim Biotechnol. 2021 Jul 19:1-6. doi: 10.1080/10495398.2021.1950744. Online ahead of print.
Russia & Avian	0			9281510	Histones as a target for influenza virus matrix protein M1	Zhirnov OP	Virology	1997	1997/09/01			10.1006/viro.1997.8700	Virology. 1997 Sep 1;235(2):302-10. doi: 10.1006/viro.1997.8700.
Russia & Wildlife	1	0		28609260	Genesis of Influenza A(H5N8) Viruses	El-Shesheny R	Emerg Infect Dis	2017	2017/06/14	PMC5547793		10.3201/eid2308.170143	Emerg Infect Dis. 2017 Aug;23(8):1368-1371. doi: 10.3201/eid2308.170143. Epub 2017 Aug 15.
Russia & Avian	0			21813657	Memory T-cell immune response in healthy young adults vaccinated with live attenuated influenza A (H5N2) vaccine	Chirkova TV	Clin Vaccine Immunol	2011	2011/08/05	PMC3187019		10.1128/CVI.05116-11	Clin Vaccine Immunol. 2011 Oct;18(10):1710-8. doi: 10.1128/CVI.05116-11. Epub 2011 Aug 3.
Finland & Avian	1	1	0	7232144	Occurrence of influenza A viruses and their antibodies in migratory birds in Finland	Estola T	Nord Vet Med	1980	1980/07/01				Nord Vet Med. 1980 Jul-Aug;32(7-8):321-4.
Russia & Avian	0			19565021	Influenza virus pathogenicity is determined by caspase cleavage motifs located in the viral proteins	Zhirnov OP	J Mol Genet Med	2009	2009/07/01	PMC2702073		10.4172/1747-0862.1000024	J Mol Genet Med. 2009 Jan 3;3(1):124-32. doi: 10.4172/1747-0862.1000024.
Russia & Avian	0			19642554	[Assessment of the use of chlorine-containing solid disinfectants in case of avian influenza pandemic]	Mel'nikova OA	Gig Sanit	2009	2009/08/01				Gig Sanit. 2009 May-Jun;(3):47-9.
Russia & Avian	0			11451486	Extracellular truncated influenza virus nucleoprotein	Prokudina EN	Virus Res	2001	2001/07/14			10.1016/s0168-1702(01)00264-7	Virus Res. 2001 Sep;77(1):43-9. doi: 10.1016/s0168-1702(01)00264-7.
Russia & Avian	1	0		32626052	Avian influenza overview May - August 2018	European Food Safety Authority	EFSA J	2018	2020/07/07	PMC7009402		10.2903/j.efsa.2018.5430	EFSA J. 2018 Sep 27;16(9):e05430. doi: 10.2903/j.efsa.2018.5430. eCollection 2018 Sep.
Russia & Avian	0			23065113	Mass spectrometry analysis of influenza virus reassortant clones does not reveal an influence of other viral proteins on S-acylation of hemagglutinin	Serebryakova MV	Arch Virol	2013	2012/10/16			10.1007/s00705-012-1510-9	Arch Virol. 2013 Feb;158(2):467-72. doi: 10.1007/s00705-012-1510-9. Epub 2012 Oct 12.
Russia & Avian	0			12068641	[Differences in receptor specificity between the influenza A viruses isolated from the duck, chicken, and human]	Gambarian AS	Mol Biol (Mosk)	2002	2002/06/19				Mol Biol (Mosk). 2002 May-Jun;36(3):542-9.
Russia & Avian	0			18312650	An antigenic epitope of influenza virus nucleoprotein (NP) associated with polymeric forms of NP	Prokudina EN	Virol J	2008	2008/03/04	PMC2311283		10.1186/1743-422X-5-37	Virol J. 2008 Feb 29;5:37. doi: 10.1186/1743-422X-5-37.
Russia & Avian	0			17881439	Epitope mapping of the hemagglutinin molecule of a highly pathogenic H5N1 influenza virus by using monoclonal antibodies	Kaverin NV	J Virol	2007	2007/09/21	PMC2169086		10.1128/JVI.01522-07	J Virol. 2007 Dec;81(23):12911-7. doi: 10.1128/JVI.01522-07. Epub 2007 Sep 19.
Russia & Avian	0			2531497	[Circulation of the influenza A virus of H13 serosubtype among seagulls in the Northern Caspian (1979-1985)]	Iamnikova SS	Vopr Virusol	1989	1989/07/01				Vopr Virusol. 1989 Jul-Aug;34(4):426-30.
Russia & Avian	0			22339706	Antiviral activity of polyporoid mushrooms (higher Basidiomycetes) from Altai Mountains (Russia)	Teplyakova TV	Int J Med Mushrooms	2012	2012/02/21			10.1615/intjmedmushr.v14.i1.40	Int J Med Mushrooms. 2012;14(1):37-45. doi: 10.1615/intjmedmushr.v14.i1.40.
Russia & Avian	0			19280991	[The study of the nonpathogenic influenza virus A/gull/Moscow/3100/2006 (H6N2) isolated in Moscow]	Lomakina NF	Mol Gen Mikrobiol Virusol	2009	2009/03/14				Mol Gen Mikrobiol Virusol. 2009;(1):32-9.
Russia & Avian	0			20464994	[Detection of antibodies to A/H5N1 influenza virus in citizens of Russian Federation]	Onishchenko GG	Zh Mikrobiol Epidemiol Immunobiol	2010	2010/05/15				Zh Mikrobiol Epidemiol Immunobiol. 2010 Mar-Apr;(2):13-6.
Russia & Avian	0			17886377	[Surveillance for avian influenza virus in synanthropic birds during epizootic and postepizootic periods on the south of west Siberia]	Sharshov KA	Zh Mikrobiol Epidemiol Immunobiol	2007	2007/09/22				Zh Mikrobiol Epidemiol Immunobiol. 2007 Jul-Aug;(4):53-6.
Russia & Avian	1	0		32625795	Avian influenza overview August - November 2018	European Food Safety Authority	EFSA J	2018	2020/07/07	PMC7009621		10.2903/j.efsa.2018.5573	EFSA J. 2018 Dec 20;16(12):e05573. doi: 10.2903/j.efsa.2018.5573. eCollection 2018 Dec.
Russia & Avian	0			22145348	[Molecular-biological and antigenic features of H5N1 subtype highly pathogenic influenza virus strains isolated in southern Siberia in 2005-2009]	Sharshov KA	Zh Mikrobiol Epidemiol Immunobiol	2011	2011/12/08				Zh Mikrobiol Epidemiol Immunobiol. 2011 Sep-Oct;(5):40-3.
Russia & Avian	0			17511604	Specific biochemical features of replication of clinical influenza viruses in human intestinal cell culture	Zhirnov OP	Biochemistry (Mosc)	2007	2007/05/22			10.1134/s0006297907040062	Biochemistry (Mosc). 2007 Apr;72(4):398-408. doi: 10.1134/s0006297907040062.
Russia & Avian	0			19240855	Studying the pathogenicity of avian influenza virus subtype H5N1 strains from the Russian Federation using mouse model	Shestopalov AM	Bull Exp Biol Med	2008	2009/02/26			10.1007/s10517-008-0296-y	Bull Exp Biol Med. 2008 Sep;146(3):341-3. doi: 10.1007/s10517-008-0296-y.
Russia & Avian	1	0		32626274	Avian influenza overview November 2018 - February 2019	European Food Safety Authority	EFSA J	2019	2020/07/07	PMC7009136		10.2903/j.efsa.2019.5664	EFSA J. 2019 Mar 28;17(3):e05664. doi: 10.2903/j.efsa.2019.5664. eCollection 2019 Mar.
Russia & Avian	0			15302215	H5N1 chicken influenza viruses display a high binding affinity for Neu5Acalpha2-3Galbeta1-4(6-HSO3)GlcNAc-containing receptors	Gambaryan AS	Virology	2004	2004/08/11			10.1016/j.virol.2004.06.002	Virology. 2004 Sep 1;326(2):310-6. doi: 10.1016/j.virol.2004.06.002.
Russia & Avian	0			10865189	Species, population and age diversity in cell resistance to adhesion of Neisseria meningitidis serogroups A, B and C	Rumyantsev SN	Microbes Infect	2000	2000/06/24			10.1016/s1286-4579(00)00320-8	Microbes Infect. 2000 Apr;2(5):447-53. doi: 10.1016/s1286-4579(00)00320-8.
Russia & Avian	0			28900092	[Impact of Delivery Method on Antiviral Activity of Phosphodiester, Phosphorothioate, and Phosphoryl Guanidine Oligonucleotides in MDCK Cells Infected with H5N1 Bird Flu Virus]	Levina AS	Mol Biol (Mosk)	2017	2017/09/14			10.7868/S0026898417040139	Mol Biol (Mosk). 2017 Jul-Aug;51(4):717-723. doi: 10.7868/S0026898417040139.
Russia & Avian	0			16823443	Avian flu: multiple introductions of H5N1 in Nigeria	Ducatez MF	Nature	2006	2006/07/11			10.1038/442037a	Nature. 2006 Jul 6;442(7098):37. doi: 10.1038/442037a.
Russia & Avian	0			25349209	Site-specific S-acylation of influenza virus hemagglutinin: the location of the acylation site relative to the membrane border is the decisive factor for attachment of stearate	Brett K	J Biol Chem	2014	2014/10/29	PMC4263894		10.1074/jbc.M114.586180	J Biol Chem. 2014 Dec 12;289(50):34978-89. doi: 10.1074/jbc.M114.586180. Epub 2014 Oct 27.
Russia & Avian	0			24640168	[Peculiarity of reassortment of current wild type influenza viruses with master donor viruses for live influenza vaccine]	Kiseleva IV	Vopr Virusol	2013	2014/03/20				Vopr Virusol. 2013 Sep-Oct;58(5):26-31.
Russia & Avian	0			20376935	[Assessment of current disinfectants to create a reserve in case of avian influenza outbreak]	Mel'nikova OA	Gig Sanit	2010	2010/04/09				Gig Sanit. 2010 Jan-Feb;(1):42-5.
Russia & Avian	0			5472069	[Relation between the pathogenicity of avian influenza viruses for laboratory animals and infection of avifauna]	Pysina TV	Vopr Virusol	1970	1970/05/01				Vopr Virusol. 1970 May-Jun;15(3):298-301.
Russia & Avian	0			21899064	[Viral sorption on polyaniline, carbon nanotubes and their based nanocomposites]	Ivanova VT	Vopr Virusol	2011	2011/09/09				Vopr Virusol. 2011 Jul-Aug;56(4):19-23.
Russia & Avian	0			8712926	Phenotypic expression of HA-NA combinations in human-avian influenza A virus reassortants	Rudneva IA	Arch Virol	1996	1996/01/01			10.1007/BF01718612	Arch Virol. 1996;141(6):1091-9. doi: 10.1007/BF01718612.
Russia & Avian	1	0		33281980	Avian influenza overview May - August 2020	European Food Safety Authority	EFSA J	2020	2020/12/07	PMC7525800		10.2903/j.efsa.2020.6270	EFSA J. 2020 Sep 30;18(9):e06270. doi: 10.2903/j.efsa.2020.6270. eCollection 2020 Sep.
Russia & Avian	0			19145328	Structural changes in the liver of mice infected with avian influenza virus subtype H5N1	Sharkova TV	Bull Exp Biol Med	2008	2009/01/16			10.1007/s10517-008-0262-8	Bull Exp Biol Med. 2008 Aug;146(2):243-5. doi: 10.1007/s10517-008-0262-8.
Russia & Avian	0			19621827	[Monitoring of antibodies to influenza A virus in populations of different regions of West Siberia]	Kurskaia OG	Zh Mikrobiol Epidemiol Immunobiol	2009	2009/07/23				Zh Mikrobiol Epidemiol Immunobiol. 2009 May-Jun;(3):92-5.
Russia & Avian	1	0		33717356	Avian influenza overview December 2020 - February 2021	European Food Safety Authority	EFSA J	2021	2021/03/15	PMC7927793		10.2903/j.efsa.2021.6497	EFSA J. 2021 Mar 3;19(3):e06497. doi: 10.2903/j.efsa.2021.6497. eCollection 2021 Mar.
Russia & Avian	0			16756173	[In vitro effects of antiviral drugs on the reproduction of highly pathogenic influenza A/H5N1 virus strains that induce epizooty among poultry in the summer of 2005]	L'vov DK	Vopr Virusol	2006	2006/06/08				Vopr Virusol. 2006 Mar-Apr;51(2):20-2.
Norway & Avian	1	0		33343737	Annual Report on surveillance for Avian Influenza in poultry and wild birds in Member States of the European Union in 2019	European Food Safety Authority (EFSA)	EFSA J	2020	2020/12/21	PMC7737617		10.2903/j.efsa.2020.6349	EFSA J. 2020 Dec 15;18(12):e06349. doi: 10.2903/j.efsa.2020.6349. eCollection 2020 Dec.
Russia & Avian	0			12058370	Study of virus-cell interaction by the method of dielectrophoresis	Generalov VM	Dokl Biochem Biophys	2002	2002/06/13			10.1023/a:1015319331211	Dokl Biochem Biophys. 2002 Mar-Apr;383:82-4. doi: 10.1023/a:1015319331211.
Russia & Avian	0			8438074	Biotic-abiotic mechanisms for long-term preservation and reemergence of influenza type A virus genes	Shoham D	Prog Med Virol	1993	1993/01/01				Prog Med Virol. 1993;40:178-92.
Russia & Avian	0			16981504	[Surveillance measures at joint-stock company "Poultry Farm Lubinskaya" during the period of avian flu epizootia in Omsk region]	Uskov PA	Zh Mikrobiol Epidemiol Immunobiol	2006	2006/09/20				Zh Mikrobiol Epidemiol Immunobiol. 2006 Jul-Aug;(5):96-9.
Russia & Avian	0			19513380	Morphological changes in bird viscera in experimental infection by highly pathogenic H5N1 avian influenza virus	Shestopalova LV	Bull Exp Biol Med	2008	2009/06/11			10.1007/s10517-009-0376-7	Bull Exp Biol Med. 2008 Dec;146(6):770-3. doi: 10.1007/s10517-009-0376-7.
Russia & Avian	1	0		18839532	[Study on characterization of the hemagglutinin gene of avian influenza virus H5N1 subtype originated from the pan Pacific regions]	Fang S	Wei Sheng Yan Jiu	2008	2008/10/09				Wei Sheng Yan Jiu. 2008 Jul;37(4):457-60.
Russia & Avian	0			16981497	[Organization of antiepidemic and antiepizootic measures during liquidation of the mass losses of poultry from from avian flu in Novosibirsk region]	Mikheev VK	Zh Mikrobiol Epidemiol Immunobiol	2006	2006/09/20				Zh Mikrobiol Epidemiol Immunobiol. 2006 Jul-Aug;(5):68-73.
Russia & Avian	0			18999893	Post-reassortment amino acid change in the hemagglutinin of a human-avian influenza H5N1 reassortant virus alters its antigenic specificity	Rudneva IA	Acta Virol	2008	2008/11/13				Acta Virol. 2008;52(3):181-4.
Russia & Avian	0			5795680	[The spectrum of antibodies in the sera of people of various ages to influenza type A virus isolated from mammals and birds]	Pysina TV	Vopr Virusol	1969	1969/01/01				Vopr Virusol. 1969 Jan-Feb;14(1):58-63.
Russia & Avian	0			12656046	[Antigenic structure of influenza A virus subtype H5 hemagglutinin: mechanism of acquiring stability to monoclonal antibodies in escape-mutants]	Il'iushina NA	Mol Gen Mikrobiol Virusol	2003	2003/03/27				Mol Gen Mikrobiol Virusol. 2003;(1):40-5.
Russia & Avian	0			21913387	[Studies of properties of pandemic influenza virus A/H1N1 circulated in Russian Federation in 2009 - 2010]	Agafonov AP	Zh Mikrobiol Epidemiol Immunobiol	2011	2011/09/15				Zh Mikrobiol Epidemiol Immunobiol. 2011 Jul-Aug;(4):24-7.
Russia & Wildlife	1	0		17112378	Asymptomatic infection with highly pathogenic avian influenza H5N1 in wild birds: how sound is the evidence?	Feare CJ	Virol J	2006	2006/11/23	PMC1661592		10.1186/1743-422X-3-96	Virol J. 2006 Nov 17;3:96. doi: 10.1186/1743-422X-3-96.
Russia & Wildlife	1	0		16408629	[Sensitivity of influenza A/H5 viruses isolated from wild birds on the territory of Russia to arbidol in the cultured MDCK cells]	Fediakina IT	Vopr Virusol	2005	2006/01/18				Vopr Virusol. 2005 Nov-Dec;50(6):32-5.
Russia & Avian	0			10441913	[The effect of influenza virus hemagglutinin on erythrocytes and thrombocytes]	Zhilinskaia IN	Izv Akad Nauk Ser Biol	1999	1999/08/12				Izv Akad Nauk Ser Biol. 1999 May-Jun;(3):355-8.
Russia & Wildlife	1	0		16981496	[Epizootic and epidemiological situation with the avian flu in Dovolensk and Kupinsk areas of Novosibirsk region and the preventive measures]	Fedianin AP	Zh Mikrobiol Epidemiol Immunobiol	2006	2006/09/20				Zh Mikrobiol Epidemiol Immunobiol. 2006 Jul-Aug;(5):66-8.
Russia & Avian	0			18050717	[Molecular genetic characteristics of the strain A/chicken/Moscow/2/2007 (H5N1) strain from a epizootic focus of highly pathogenic influenza A among agricultural birds in the neear-Moscow region (February 2007)]	L'vov DK	Vopr Virusol	2007	2007/12/07				Vopr Virusol. 2007 Nov-Dec;52(6):40-7.
Russia & Avian	0			17100646	Isolation of influenza virus A hemagglutinin C-terminal domain by hemagglutinin proteolysis in octylglucoside micelles	Radyukhin VA	Protein Pept Lett	2006	2006/11/15			10.2174/092986606778256207	Protein Pept Lett. 2006;13(9):907-13. doi: 10.2174/092986606778256207.
Sweden & Wildlife	1	1	0	15709000	Characterization of a novel influenza A virus hemagglutinin subtype (H16) obtained from black-headed gulls	Fouchier RA	J Virol	2005	2005/02/15	PMC548452		10.1128/JVI.79.5.2814-2822.2005	J Virol. 2005 Mar;79(5):2814-22. doi: 10.1128/JVI.79.5.2814-2822.2005.
Canada & Wildlife	1	1	0	28545432	The impact of migratory flyways on the spread of avian influenza virus in North America	Fourment M	BMC Evol Biol	2017	2017/05/27	PMC5445350		10.1186/s12862-017-0965-4	BMC Evol Biol. 2017 May 25;17(1):118. doi: 10.1186/s12862-017-0965-4.
Russia & Avian	0			4799698	[Isolation of the Hong Kong variant of type A influenza virus from sick chickens in the Kamchatka region]	Zhezmer VIu	Vopr Virusol	1973	1973/01/01				Vopr Virusol. 1973 Jan-Feb;18(1):94-9.
Arctic & Wildlife	1	1	1	29944408	Avian Influenza Virus Surveillance in High Arctic Breeding Geese, Greenland	Gaidet N	Avian Dis	2018	2018/06/27			10.1637/11793-010418-ResNote.1	Avian Dis. 2018 Jun;62(2):237-240. doi: 10.1637/11793-010418-ResNote.1.
Russia & Bird	0			32214534	Synthesis and biological activity of water-soluble polymer complexes of arbidol	Eropkin MY	Pharm Chem J	2009	2020/03/28	PMC7088646		10.1007/s11094-010-0351-7	Pharm Chem J. 2009;43(10):563-567. doi: 10.1007/s11094-010-0351-7. Epub 2010 Feb 4.
Russia & Bird	0			34463877	2021 Taxonomic update of phylum Negarnaviricota (Riboviria: Orthornavirae), including the large orders Bunyavirales and Mononegavirales	Kuhn JH	Arch Virol	2021	2021/08/31			10.1007/s00705-021-05143-6	Arch Virol. 2021 Aug 31. doi: 10.1007/s00705-021-05143-6. Online ahead of print.
Russia & Marine Mammals	0			15864964	[Epidemiology and prophylaxis of influenza and other acute respiratory infections occurred in the military collectives]	Belov AB	Voen Med Zh	2005	2005/05/04				Voen Med Zh. 2005 Mar;326(3):32-8, 80.
Russia & Marine Mammals	0			29171473	[Time course of changes in cytokines (IFN-γ, IFN-α, IL-18, TNF-α) in the treatment of moderate influenza A (H1N1) pdm09 (2013-2016) with oseltamivir (Tamiflu) and umifenovir (Arbidol) alone and in combination with Kagocel]	Popov AF	Ter Arkh	2017	2017/11/25			10.17116/terarkh2017891066-70	Ter Arkh. 2017;89(10):66-70. doi: 10.17116/terarkh2017891066-70.
Russia & Marine Mammals	0			28869526	Modulation of Immunogenicity and Conformation of HA1 Subunit of Influenza A Virus H1/N1 Hemagglutinin in Tubular Immunostimulating Complexes	Sanina N	Int J Mol Sci	2017	2017/09/05	PMC5618544		10.3390/ijms18091895	Int J Mol Sci. 2017 Sep 3;18(9):1895. doi: 10.3390/ijms18091895.
Russia & Marine Mammals	0			30768887	[Experience of application of the PCR for identification of the causative agent of community acquired pneumonia in the military.]	Speranskaya EV	Klin Lab Diagn	2018	2019/02/16			10.18821/0869-2084-2018-63-10-641-645	Klin Lab Diagn. 2018;63(10):641-645. doi: 10.18821/0869-2084-2018-63-10-641-645.
Russia & Marine Mammals	0			25060667	On the possibility of lipid-induced regulation of conformation and immunogenicity of influenza a virus H1/N1 hemagglutinin as antigen of TI-complexes	Vorobieva N	J Mol Microbiol Biotechnol	2014	2014/07/26			10.1159/000365053	J Mol Microbiol Biotechnol. 2014;24(3):202-9. doi: 10.1159/000365053. Epub 2014 Jul 19.
Russia & Marine Mammals	0			15024982	[Evaluation of influenza vaccine Vaxigrip in the combined immunization of conscripts during influenza seasons of 2002-2003]	Burtseva EI	Zh Mikrobiol Epidemiol Immunobiol	2004	2004/03/18				Zh Mikrobiol Epidemiol Immunobiol. 2004 Jan-Feb;(1):49-55.
Russia & Marine Mammals	0			21395158	[Epidemiological aspects of the influenza "pandemia" during 2009-2010 years]	Belov AB	Voen Med Zh	2010	2011/03/15				Voen Med Zh. 2010 Nov;331(11):37-41.
Russia & Marine Mammals	0			24611310	[Epidemiology and prophylaxis of community-acquired pneumonia in servicemen]	Zhogolev SD	Voen Med Zh	2013	2014/03/12				Voen Med Zh. 2013 Nov;334(11):55-60.
Russia & Marine Mammals	0			21874884	[Prospects for reducing the incidence of military air-borne infections which are not controllable by means of vaccination]	Belov AB	Voen Med Zh	2011	2011/08/31				Voen Med Zh. 2011 May;332(5):42-8.
Russia & Marine Mammals	0			9148573	[The prevention of influenza among the troops]	Perepelkin VS	Voen Med Zh	1997	1997/02/01				Voen Med Zh. 1997 Feb;318(2):18-20, 79.
Russia & Marine Mammals	0			8284915	[The use of saliva for study in the immunoenzyme analysis of postvaccinal and postinfectious immunity to influenza]	Naĭkhin AN	Vopr Virusol	1993	1993/09/01				Vopr Virusol. 1993 Sep-Dec;38(5):201-4.
Russia & Marine Mammals	0			8356819	[The prospects for using inactivated influenza vaccines on the troops]	Furgal SM	Voen Med Zh	1993	1993/05/01				Voen Med Zh. 1993 May;(5):35-6, 80.
Russia & Marine Mammals	0			23213772	[About the estimation of non specific protective effect of vaccination against infections actual for military personnel]	Mar'in GG	Voen Med Zh	2012	2012/12/11				Voen Med Zh. 2012 Oct;333(10):40-6.
Russia & Marine Mammals	0			7856138	[The chemoprophylaxis of influenza in troop units]	Efimov EI	Voen Med Zh	1994	1994/11/01				Voen Med Zh. 1994 Nov;(11):34-6, 80.
Russia & Marine Mammals	0			10703208	[Imported malaria in the Kabardino-Balkarian Republic]	Shomakhov AO	Med Parazitol (Mosk)	1999	2000/03/07				Med Parazitol (Mosk). 1999 Apr-Jun;(2):48-51.
Russia & Marine Mammals	0			14671894	[Efficiency of "Vaxigrip" vaccine in the complex immunization of servicemen]	Burtseva EI	Voen Med Zh	2003	2003/12/16				Voen Med Zh. 2003 Oct;324(10):41-5.
Russia & Marine Mammals	0			24341017	[Clinical and epidemiological value of adenovirus infection in the military personnel]	L'vov NI	Voen Med Zh	2013	2013/12/18				Voen Med Zh. 2013 Aug;334(8):19-24.
Russia & Marine Mammals	0			10732477	[The prevention of influenza and other acute respiratory infections among the troops]	Brazhnik NP	Voen Med Zh	1999	2000/03/25				Voen Med Zh. 1999 Dec;320(12):16-9.
Russia & Marine Mammals	0			9163208	[The early diagnosis and treatment of influenza complications in servicemen]	Likhopoenko VP	Voen Med Zh	1996	1996/12/01				Voen Med Zh. 1996 Dec;317(12):11.
Russia & Marine Mammals	0			11881202	[Epidemiologic effectivness of poludane in preventing influenza and other acute respiratory diseases in troops]	Shumilov VI	Voen Med Zh	2002	2002/03/08				Voen Med Zh. 2002 Jan;323(1):45-7, 93.
Russia & Marine Mammals	0			8592859	[The efficacy of Polirem in the prevention of influenza in servicemen]	Efimov EI	Voen Med Zh	1995	1995/02/01				Voen Med Zh. 1995 Feb;(2):48-9, 80.
Russia & Marine Mammals	0			1441268	[Body immunocorrection when vaccination is contraindicated (a clinico-epidemiological validation)]	Furgal SM	Voen Med Zh	1992	1992/08/01				Voen Med Zh. 1992 Aug;(8):31-4.
Russia & Marine Mammals	0			11569269	[Epidemiological effectiveness of influenza immunoprophylaxis with Unifluvax vaccine in organized groups of servicemen]	Akimkin VG	Zh Mikrobiol Epidemiol Immunobiol	2001	2001/09/25				Zh Mikrobiol Epidemiol Immunobiol. 2001 Jul-Aug;(4):64-5.
Russia & Marine Mammals	0			8992744	[The dynamics of anti-influenza immunity in sailors of the Baltic Fleet]	Protasov VV	Voen Med Zh	1996	1996/09/01				Voen Med Zh. 1996 Sep;317(9):33-4.
Russia & Marine Mammals	0			9148581	[The prophylactic efficacy of the trivalent polymer-subunit influenza vaccine Grippol (3)]	El'shina GA	Voen Med Zh	1997	1997/02/01				Voen Med Zh. 1997 Feb;318(2):47-9.
Russia & Climate Change	0			24352276	365 days: Nature's 10		Nature	2013	2013/12/20			10.1038/504357a	Nature. 2013 Dec 19;504(7480):357-65. doi: 10.1038/504357a.
Russia & Environment	0			28774928	The microbial metabolite desaminotyrosine protects from influenza through type I interferon	Steed AL	Science	2017	2017/08/05	PMC5753406	NIHMS928138	10.1126/science.aam5336	Science. 2017 Aug 4;357(6350):498-502. doi: 10.1126/science.aam5336.
Russia & Environment	0			32594933	Epidemiological and genetic characteristics of influenza virus and the effects of air pollution on laboratory-confirmed influenza cases in Hulunbuir, China, from 2010 to 2019	Lu B	Epidemiol Infect	2020	2020/06/30	PMC7424604		10.1017/S0950268820001387	Epidemiol Infect. 2020 Jun 29;148:e159. doi: 10.1017/S0950268820001387.
Russia & Environment	0			32524262	Severe cases of seasonal influenza and detection of seasonal A(H1N2) in Russia in 2018-2019	Kolosova NP	Arch Virol	2020	2020/06/12			10.1007/s00705-020-04699-z	Arch Virol. 2020 Sep;165(9):2045-2051. doi: 10.1007/s00705-020-04699-z. Epub 2020 Jun 10.
Russia & Environment	0			27706149	Influenza Pandemics and Tuberculosis Mortality in 1889 and 1918: Analysis of Historical Data from Switzerland	Zürcher K	PLoS One	2016	2016/10/06	PMC5051959		10.1371/journal.pone.0162575	PLoS One. 2016 Oct 5;11(10):e0162575. doi: 10.1371/journal.pone.0162575. eCollection 2016.
Russia & Environment	0			31046725	Influenza epidemiology and influenza vaccine effectiveness during the 2016-2017 season in the Global Influenza Hospital Surveillance Network (GIHSN)	Baselga-Moreno V	BMC Public Health	2019	2019/05/04	PMC6498567		10.1186/s12889-019-6713-5	BMC Public Health. 2019 May 2;19(1):487. doi: 10.1186/s12889-019-6713-5.
Russia & Environment	0			31668495	Analyzing influenza outbreaks in Russia using an age-structured dynamic transmission model	Leonenko V	Epidemics	2019	2019/11/01			10.1016/j.epidem.2019.100358	Epidemics. 2019 Dec;29:100358. doi: 10.1016/j.epidem.2019.100358. Epub 2019 Jul 22.
Russia & Environment	0			31088481	Influenza epidemiology and influenza vaccine effectiveness during the 2015-2016 season: results from the Global Influenza Hospital Surveillance Network	Puig-Barberà J	BMC Infect Dis	2019	2019/05/16	PMC6518734		10.1186/s12879-019-4017-0	BMC Infect Dis. 2019 May 14;19(1):415. doi: 10.1186/s12879-019-4017-0.
Russia & Environment	0			27776172	Fatal Cases of Seasonal Influenza in Russia in 2015-2016	Ilyicheva T	PLoS One	2016	2016/10/25	PMC5077104		10.1371/journal.pone.0165332	PLoS One. 2016 Oct 24;11(10):e0165332. doi: 10.1371/journal.pone.0165332. eCollection 2016.
Russia & Environment	0			27556802	Influenza epidemiology and influenza vaccine effectiveness during the 2014-2015 season: annual report from the Global Influenza Hospital Surveillance Network	Puig-Barberà J	BMC Public Health	2016	2016/08/25	PMC5001209		10.1186/s12889-016-3378-1	BMC Public Health. 2016 Aug 22;16 Suppl 1(Suppl 1):757. doi: 10.1186/s12889-016-3378-1.
Russia & Environment	0			28635831	[The 2015-2016 epidemic season in Russia and the world: Circulation of influenza viruses, trends in incidence, clinical aspects, and treatment algorithm]	Lvov DK	Ter Arkh	2016	2017/06/22			10.17116/terarkh20168811112-120	Ter Arkh. 2016;88(11):112-120. doi: 10.17116/terarkh20168811112-120.
Russia & Environment	0			30550100	[Etiological structure of influenza and other ARVI in St. Petersburg during epidemic seasons 2012-2016.]	Pisareva MM	Vopr Virusol	2018	2018/12/15			10.18821/0507-4088-2018-63-5-233-239	Vopr Virusol. 2018;63(5):233-239. doi: 10.18821/0507-4088-2018-63-5-233-239.
Russia & Environment	0			27690141	Genetic characterization of influenza viruses from influenza-related hospital admissions in the St. Petersburg and Valencia sites of the Global Influenza Hospital Surveillance Network during the 2013/14 influenza season	López-Labrador FX	J Clin Virol	2016	2016/10/01			10.1016/j.jcv.2016.09.006	J Clin Virol. 2016 Nov;84:32-38. doi: 10.1016/j.jcv.2016.09.006. Epub 2016 Sep 28.
Russia & Environment	0			22442981	[Ethical principles of management and planning during influenza pandemic]	Kubar' OI	Zh Mikrobiol Epidemiol Immunobiol	2012	2012/03/27				Zh Mikrobiol Epidemiol Immunobiol. 2012 Jan-Feb;(1):107-12.
Russia & Environment	0			32896576	Virions and respiratory droplets in air: Diffusion, drift, and contact with the epithelium	Zhdanov VP	Biosystems	2020	2020/09/08			10.1016/j.biosystems.2020.104241	Biosystems. 2020 Dec;198:104241. doi: 10.1016/j.biosystems.2020.104241. Epub 2020 Sep 5.
Russia & Environment	0			9258574	Cold-adapted live attenuated influenza vaccines developed in Russia: can they contribute to meeting the needs for influenza control in other countries?	Kendal AP	Eur J Epidemiol	1997	1997/07/01			10.1023/a:1007327505862	Eur J Epidemiol. 1997 Jul;13(5):591-609. doi: 10.1023/a:1007327505862.
Russia & Environment	0			23477251	[An influenza pandemic in Russia as a part of a global spread of the influenza A(H1N1)pdm09 in 2009-2011]	Karpova LS	Vopr Virusol	2012	2013/03/13				Vopr Virusol. 2012 Nov-Dec;57(6):26-30.
Russia & Environment	0			18756810	[Epidemic strains influenza viruses A and B in the 2005-2006 season in Russia]	Ivanova VT	Vopr Virusol	2008	2008/09/02				Vopr Virusol. 2008 Jul-Aug;53(4):13-8.
Russia & Environment	0			27593158	Development and approval of live attenuated influenza vaccines based on Russian master donor viruses: Process challenges and success stories	Rudenko L	Vaccine	2016	2016/09/06	PMC5357706		10.1016/j.vaccine.2016.08.018	Vaccine. 2016 Oct 26;34(45):5436-5441. doi: 10.1016/j.vaccine.2016.08.018. Epub 2016 Sep 1.
Russia & Environment	0			24006633	[Efficiency of the influenza A and B viruses isolation from nasopharyngeal swabs taken in the test tubes Sigma-Virocult (M40 Compliant, Sigma Virocult) and Virocult (M40 Compliant, Virocult) in 2010-2011 epidemic season]	Shevchenko ES	Vopr Virusol	2013	2013/09/07				Vopr Virusol. 2013 May-Jun;58(3):42-5.
Russia & Environment	0			32490728	Cold and distant: structural features of the nucleoprotein complex of a cold-adapted influenza A virus strain	Shvetsov AV	J Biomol Struct Dyn	2021	2020/06/04			10.1080/07391102.2020.1776636	J Biomol Struct Dyn. 2021 Aug;39(12):4375-4384. doi: 10.1080/07391102.2020.1776636. Epub 2020 Jun 16.
Russia & Environment	0			26992820	Rapid spread of influenza A(H1N1)pdm09 viruses with a new set of specific mutations in the internal genes in the beginning of 2015/2016 epidemic season in Moscow and Saint Petersburg (Russian Federation)	Komissarov A	Influenza Other Respir Viruses	2016	2016/03/20	PMC4910175		10.1111/irv.12389	Influenza Other Respir Viruses. 2016 Jul;10(4):247-53. doi: 10.1111/irv.12389. Epub 2016 May 27.
Russia & Environment	0			30770729	Epidemiology of influenza in pregnant women hospitalized with respiratory illness in Moscow, 2012/2013-2015/2016: a hospital-based active surveillance study	Trushakova S	BMC Pregnancy Childbirth	2019	2019/02/17	PMC6377748		10.1186/s12884-019-2192-z	BMC Pregnancy Childbirth. 2019 Feb 15;19(1):72. doi: 10.1186/s12884-019-2192-z.
Russia & Environment	0			26016346	[Monitoring of influenza and other respiratory diseases causative agents in children, hospitalized with community-acquired pneumonia in 2012-2013 epidemic season]	Ostrovskaya OV	Zh Mikrobiol Epidemiol Immunobiol	2015	2015/05/29				Zh Mikrobiol Epidemiol Immunobiol. 2015 Mar-Apr;(2):59-65.
Russia & Environment	0			21786596	[Arborviruses of the California encephalitis serogroup 1N Russia and their contribution to infectious pathology]	Kolobukhina LV	Vestn Ross Akad Med Nauk	2011	2011/07/27				Vestn Ross Akad Med Nauk. 2011;(5):41-5.
Russia & Environment	0			11548244	[Biological activity of Spirulina]	Blinkova LP	Zh Mikrobiol Epidemiol Immunobiol	2001	2001/09/11				Zh Mikrobiol Epidemiol Immunobiol. 2001 Mar-Apr;(2):114-8.
Russia & Environment	0			26495719	[Child and Adolescent Interepydemic Immunity to Influenza Viruses]	Lyapunov AV	Vestn Ross Akad Med Nauk	2015	2015/10/27			10.15690/vramn.v70i3.1327	Vestn Ross Akad Med Nauk. 2015;(3):315-9. doi: 10.15690/vramn.v70i3.1327.
Russia & Environment	0			25246360	Seasonal immune modulation in humans: observed patterns and potential environmental drivers	Paynter S	J Infect	2015	2014/09/24			10.1016/j.jinf.2014.09.006	J Infect. 2015 Jan;70(1):1-10. doi: 10.1016/j.jinf.2014.09.006. Epub 2014 Sep 22.
Russia & Environment	0			19882900	[The characteristics of epidemic influenza A and B virus strains circulating in Russia during the 2007-2008 season]	Ivanova VT	Vopr Virusol	2009	2009/11/04				Vopr Virusol. 2009 Sep-Oct;54(5):28-33.
Russia & Environment	0			25509893	[The 2013-2014 epidemic season. Hospital monitoring and antiviral therapy for influenza ]	Kolobukhina LV	Ter Arkh	2014	2014/12/17				Ter Arkh. 2014;86(10):52-9.
Russia & Environment	0			22624469	[The specific features of the cocirculation of influenza viruses in the 2010-2011 postpandemic period according to the results of activities of the D. I. Ivanovsky Research Institute of Virology, Ministry of Health and Social Development of Russia]	Burtseva EI	Vopr Virusol	2012	2012/05/26				Vopr Virusol. 2012 Jan-Feb;57(1):20-8.
Russia & Environment	0			32248454	Genetic Basis of Attenuation of Cold-Adapted Influenza Strain B/Leningrad/14/17/55 - Backup Master Donor Virus for Influenza Type B Live Attenuated Vaccines	Krutikova EV	Bull Exp Biol Med	2020	2020/04/06			10.1007/s10517-020-04777-x	Bull Exp Biol Med. 2020 Mar;168(5):669-672. doi: 10.1007/s10517-020-04777-x. Epub 2020 Apr 4.
Russia & Environment	0			12163588	Cleavage of influenza a virus hemagglutinin in human respiratory epithelium is cell associated and sensitive to exogenous antiproteases	Zhirnov OP	J Virol	2002	2002/08/07	PMC136409		10.1128/jvi.76.17.8682-8689.2002	J Virol. 2002 Sep;76(17):8682-9. doi: 10.1128/jvi.76.17.8682-8689.2002.
Russia & Environment	0			17500235	[Rimantadine and arbidol sensitivity of influenza viruses that caused epidemic morbidity rise in Russia in the 2004-2005 season]	Burtseva EI	Vopr Virusol	2007	2007/05/16				Vopr Virusol. 2007 Mar-Apr;52(2):24-9.
Russia & Environment	0			20007357	PB2 and PA genes control the expression of the temperature-sensitive phenotype of cold-adapted B/USSR/60/69 influenza master donor virus	Kiseleva IV	J Gen Virol	2010	2009/12/17			10.1099/vir.0.017996-0	J Gen Virol. 2010 Apr;91(Pt 4):931-7. doi: 10.1099/vir.0.017996-0. Epub 2009 Dec 9.
Russia & Environment	0			29944709	Intermediate levels of vaccination coverage may minimize seasonal influenza outbreaks	Zarnitsyna VI	PLoS One	2018	2018/06/27	PMC6019388		10.1371/journal.pone.0199674	PLoS One. 2018 Jun 26;13(6):e0199674. doi: 10.1371/journal.pone.0199674. eCollection 2018.
Russia & Environment	0			16636095	Prevention of exacerbations: how are we doing and can we do better?	Burge PS	Proc Am Thorac Soc	2006	2006/04/26			10.1513/pats.200511-117SF	Proc Am Thorac Soc. 2006 May;3(3):257-61. doi: 10.1513/pats.200511-117SF.
Russia & Environment	0			18825482	Cold co-extraction of hemagglutinin and matrix M1 protein from influenza virus A by a combination of non-ionic detergents allows for visualization of the raft-like nature of the virus envelope	Radyukhin V	Arch Virol	2008	2008/10/01			10.1007/s00705-008-0214-7	Arch Virol. 2008;153(10):1977-80. doi: 10.1007/s00705-008-0214-7. Epub 2008 Sep 30.
Russia & Environment	0			28005035	[Acute respiratory viral infections: Topical issues of diagnosis, prevention and treatment in therapeutic practice]	Trukhan DI	Ter Arkh	2016	2016/12/23			10.17116/terarkh2016881176-82	Ter Arkh. 2016;88(11):76-82. doi: 10.17116/terarkh2016881176-82.
Russia & Environment	0			12445939	An evaluation of the genetic stability and pathogenicity of the Russian cold-adapted influenza A donor strains A/Leningrad/134/17/57 and A/Leningrad/134/47/57 in ferrets	Marsh GA	J Virol Methods	2003	2002/11/26			10.1016/s0166-0934(02)00191-x	J Virol Methods. 2003 Jan;107(1):63-9. doi: 10.1016/s0166-0934(02)00191-x.
Russia & Environment	0			6231786	[Circulation of influenza A virus (H3N2) and its role in the occurrence of epidemics 1976-1981]	Lazareva TA	Zh Mikrobiol Epidemiol Immunobiol	1984	1984/02/01				Zh Mikrobiol Epidemiol Immunobiol. 1984 Feb;(2):63-7.
Russia & Environment	0			26501135	The microbiome of the maxillary sinus and middle nasal meatus in chronic rhinosinusitis	Ivanchenko OA	Rhinology	2016	2015/10/27			10.4193/Rhino15.018	Rhinology. 2016 Mar;54(1):68-74. doi: 10.4193/Rhino15.018.
Russia & Environment	0			2075770	[The use of influenza vaccines and remantadine for protection against influenza in industrial enterprises]	Mal'chikov IA	Zh Mikrobiol Epidemiol Immunobiol	1990	1990/10/01				Zh Mikrobiol Epidemiol Immunobiol. 1990 Oct;(10):79-84.
Russia & Environment	0			11450146	[Live cold-adapted reassortant influenza vaccines]	Gendon IuZ	Vopr Virusol	2001	2001/07/14				Vopr Virusol. 2001 May-Jun;46(3):5-12.
Russia & Environment	0			27385419	Cold-adapted influenza viruses as a promising platform for viral-vector vaccines	Isakova-Sivak I	Expert Rev Vaccines	2016	2016/07/08			10.1080/14760584.2016.1208088	Expert Rev Vaccines. 2016 Oct;15(10):1241-3. doi: 10.1080/14760584.2016.1208088. Epub 2016 Jul 11.
Russia & Environment	0			29161833	Prediction of influenza peaks in Russian cities: Comparing the accuracy of two SEIR models	Leonenko VN	Math Biosci Eng	2018	2017/11/23			10.3934/mbe.2018009	Math Biosci Eng. 2018 Feb 1;15(1):209-232. doi: 10.3934/mbe.2018009.
Russia & Environment	0			22749796	Vaccine production training to develop the workforce of foreign institutions supported by the BARDA influenza vaccine capacity building program	Tarbet EB	Vaccine	2013	2012/07/04			10.1016/j.vaccine.2012.06.041	Vaccine. 2013 Mar 15;31(12):1646-9. doi: 10.1016/j.vaccine.2012.06.041. Epub 2012 Jun 29.
Russia & Environment	0			15881391	[Genetic and phenotypic analysis of heterogeneous population of a cold-adapted donor of the A/Leningrad/134/17/57 (H2N2) attenuation and of the donor-based reassortant influenza vaccine strains]	Kiseleva IV	Vopr Virusol	2005	2005/05/11				Vopr Virusol. 2005 Mar-Apr;50(2):14-8.
Russia & Environment	0			22022946	Gel-based microarrays in clinical diagnostics in Russia	Gryadunov D	Expert Rev Mol Diagn	2011	2011/10/26			10.1586/erm.11.73	Expert Rev Mol Diagn. 2011 Nov;11(8):839-53. doi: 10.1586/erm.11.73.
Russia & Environment	0			28161415	Estimating contact patterns relevant to the spread of infectious diseases in Russia	Ajelli M	J Theor Biol	2017	2017/02/06			10.1016/j.jtbi.2017.01.041	J Theor Biol. 2017 Apr 21;419:1-7. doi: 10.1016/j.jtbi.2017.01.041. Epub 2017 Feb 1.
Russia & Environment	0			33897916	Making a complex dental care tailored to the person: population health in focus of predictive, preventive and personalised (3P) medical approach	Tachalov VV	EPMA J	2021	2021/04/26	PMC8053896		10.1007/s13167-021-00240-7	EPMA J. 2021 Apr 19;12(2):1-12. doi: 10.1007/s13167-021-00240-7. Online ahead of print.
Russia & Environment	0			30542337	Prevalence of Common Respiratory Viral Infections and Identification of Adenovirus in Hospitalized Adults in Harbin, China 2014 to 2017	Wang Y	Front Microbiol	2018	2018/12/14	PMC6277751		10.3389/fmicb.2018.02919	Front Microbiol. 2018 Nov 27;9:2919. doi: 10.3389/fmicb.2018.02919. eCollection 2018.
Russia & Environment	0			24415946	Intrasubtype reassortments cause adaptive amino acid replacements in H3N2 influenza genes	Neverov AD	PLoS Genet	2014	2014/01/14	PMC3886890		10.1371/journal.pgen.1004037	PLoS Genet. 2014 Jan;10(1):e1004037. doi: 10.1371/journal.pgen.1004037. Epub 2014 Jan 9.
Russia & Environment	0			29027148	Safety of Russian-Backbone Trivalent, Live Attenuated Seasonal Influenza Vaccine in Healthy Subjects: Open-Label, Non-randomized Phase 4 Study	Nigwekar PV	Drug Saf	2018	2017/10/14			10.1007/s40264-017-0605-3	Drug Saf. 2018 Feb;41(2):171-177. doi: 10.1007/s40264-017-0605-3.
Russia & Environment	0			6604366	[Anti-influenza immunity and the prediction of influenza morbidity in the upcoming epidemic season]	Slepushkin AN	Vopr Virusol	1983	1983/05/01				Vopr Virusol. 1983 May-Jun;(3):290-2.
Russia & Environment	0			16830588	[Etiology of influenza according to the data of serological diagnostics in hospital patients in St. Petersburg at the period of 1968 - 2000]	Karpova LS	Zh Mikrobiol Epidemiol Immunobiol	2006	2006/07/13				Zh Mikrobiol Epidemiol Immunobiol. 2006 May-Jun;(3):41-5.
Russia & Environment	0			33632144	Prevalence and antimicrobial resistance profiles of respiratory microbial flora in African children with HIV-associated chronic lung disease	Abotsi RE	BMC Infect Dis	2021	2021/02/26	PMC7908671		10.1186/s12879-021-05904-3	BMC Infect Dis. 2021 Feb 25;21(1):216. doi: 10.1186/s12879-021-05904-3.
Russia & Environment	0			6221493	[Organization and evaluation of the effectiveness of emergency prophylaxis and early treatment of influenza with remantadine in Serevodvinsk]	Gagarinova VM	Zh Mikrobiol Epidemiol Immunobiol	1983	1983/03/01				Zh Mikrobiol Epidemiol Immunobiol. 1983 Mar;(3):60-3.
Russia & Environment	0			311977	[Immune structure of the population of Moscow to the strains of the influenza viruses A(H3N2), A(H1N1) and B circulating in 1977]	Slepushkin AN	Vopr Virusol	1979	1979/03/01				Vopr Virusol. 1979 Mar-Apr;(2):175-80.
Russia & Environment	0			6233829	[Dynamics of population immunity to influenza A and B viruses resulting from the introduction of a comprehensive influenza control system in a city]	Kustikova IuG	Zh Mikrobiol Epidemiol Immunobiol	1984	1984/03/01				Zh Mikrobiol Epidemiol Immunobiol. 1984 Mar;(3):103-6.
Russia & Environment	0			31346883	Experimental Study of Genetic Constellation of Cold-Adapted Master Donor Viruses for Live Attenuated Influenza Vaccine Type B	Krutikova EV	Bull Exp Biol Med	2019	2019/07/27			10.1007/s10517-019-04532-x	Bull Exp Biol Med. 2019 Jul;167(3):384-387. doi: 10.1007/s10517-019-04532-x. Epub 2019 Jul 26.
Russia & Environment	0			2938336	[Results of a study of the effectiveness of simultaneous immunization against influenza with live and inactivated vaccines (1980-1983)]	Zhilova GP	Vopr Virusol	1986	1986/01/01				Vopr Virusol. 1986 Jan-Feb;31(1):40-4.
Russia & Environment	0			21449076	[Pandemic influenza virus A (H1N1) in Amur region in autumn 2009]	romanovskaia AA	Zh Mikrobiol Epidemiol Immunobiol	2011	2011/03/31				Zh Mikrobiol Epidemiol Immunobiol. 2011 Jan-Feb;(1):35-9.
Russia & Environment	0			19152418	Evaluation of properties of chitosan as an adjuvant for inactivated influenza vaccines administered parenterally	Ghendon Y	J Med Virol	2009	2009/01/20			10.1002/jmv.21415	J Med Virol. 2009 Mar;81(3):494-506. doi: 10.1002/jmv.21415.
Russia & Environment	0			6606903	[Humoral immunity to influenza A and B viruses in the blood sera of children younger than 14 in 1981]	Slepushkin AN	Vopr Virusol	1983	1983/09/01				Vopr Virusol. 1983 Sep-Oct;28(5):564-7.
Russia & Environment	0			23108499	Unusual titration of the membrane-bound artificial hemagglutinin fusion peptide	Dubovskii PV	Eur Biophys J	2012	2012/10/31			10.1007/s00249-012-0867-8	Eur Biophys J. 2012 Dec;41(12):1077-84. doi: 10.1007/s00249-012-0867-8. Epub 2012 Oct 29.
Russia & Environment	0			27010206	Revealing the True Incidence of Pandemic A(H1N1)pdm09 Influenza in Finland during the First Two Seasons - An Analysis Based on a Dynamic Transmission Model	Shubin M	PLoS Comput Biol	2016	2016/03/25	PMC4807082		10.1371/journal.pcbi.1004803	PLoS Comput Biol. 2016 Mar 24;12(3):e1004803. doi: 10.1371/journal.pcbi.1004803. eCollection 2016 Mar.
Russia & Environment	0			21786594	[Molecular diagnostics of influenza]	Grebennikova TV	Vestn Ross Akad Med Nauk	2011	2011/07/27				Vestn Ross Akad Med Nauk. 2011;(5):28-34.
Russia & Environment	0			8236937	[The incidence of detecting influenza virus antigens in the peripheral blood lymphocytes of donors in relation to the epidemic activity of influenza viruses A and B]	Isaeva EI	Vopr Virusol	1993	1993/07/01				Vopr Virusol. 1993 Jul-Aug;38(4):146-9.
Russia & Environment	0			7782782	Genetic stability of cold-adapted A/Leningrad/134/47/57 (H2N2) influenza virus: sequence analysis of live cold-adapted reassortant vaccine strains before and after replication in children	Klimov AI	J Gen Virol	1995	1995/06/01			10.1099/0022-1317-76-6-1521	J Gen Virol. 1995 Jun;76 ( Pt 6):1521-5. doi: 10.1099/0022-1317-76-6-1521.
Russia & Environment	0			21315402	Genetic bases of the temperature-sensitive phenotype of a master donor virus used in live attenuated influenza vaccines: A/Leningrad/134/17/57 (H2N2)	Isakova-Sivak I	Virology	2011	2011/02/15			10.1016/j.virol.2011.01.004	Virology. 2011 Apr 10;412(2):297-305. doi: 10.1016/j.virol.2011.01.004. Epub 2011 Feb 18.
Russia & Environment	0			6091375	[Antigenic anachronism of the influenza A(H2N2) viruses in Leningrad in 1980. I. The epidemiological and serological characteristics of the influenzal infection caused by A/Leningrad/80 (H2N2) viruses]	Karpukhin GI	Zh Mikrobiol Epidemiol Immunobiol	1984	1984/08/01				Zh Mikrobiol Epidemiol Immunobiol. 1984 Aug;(8):105-10.
Russia & Environment	0			20208997	Female scent signals enhance the resistance of male mice to influenza	Litvinova EA	PLoS One	2010	2010/03/09	PMC2830430		10.1371/journal.pone.0009473	PLoS One. 2010 Mar 1;5(3):e9473. doi: 10.1371/journal.pone.0009473.
Siberia & Wildlife	0			21310090	Characterization of a non-pathogenic H5N1 influenza virus isolated from a migratory duck flying from Siberia in Hokkaido, Japan, in October 2009	Yamamoto N	Virol J	2011	2011/02/12	PMC3048565		10.1186/1743-422X-8-65	Virol J. 2011 Feb 11;8:65. doi: 10.1186/1743-422X-8-65.
Siberia & Wildlife	0			33327524	Re-Invasion of H5N8 High Pathogenicity Avian Influenza Virus Clade 2.3.4.4b in Hokkaido, Japan, 2020	Isoda N	Viruses	2020	2020/12/17	PMC7764937		10.3390/v12121439	Viruses. 2020 Dec 14;12(12):1439. doi: 10.3390/v12121439.
Siberia & Wildlife	0			26159311	Phylogenetic analysis of highly pathogenic avian influenza A(H5N8) virus outbreak strains provides evidence for four separate introductions and one between-poultry farm transmission in the Netherlands, November 2014	Bouwstra RJ	Euro Surveill	2015	2015/07/11			10.2807/1560-7917.es2015.20.26.21174	Euro Surveill. 2015 Jul 2;20(26):21174. doi: 10.2807/1560-7917.es2015.20.26.21174.
Siberia & Wildlife	0			31538564	Serologic Evidence of Exposure to Highly Pathogenic Avian Influenza H5 Viruses in Migratory Shorebirds, Australia	Wille M	Emerg Infect Dis	2019	2019/09/21	PMC6759277		10.3201/eid2510.190699	Emerg Infect Dis. 2019 Oct;25(10):1903-1910. doi: 10.3201/eid2510.190699.
Siberia & Wildlife	0			17158217	Predicting the global spread of H5N1 avian influenza	Kilpatrick AM	Proc Natl Acad Sci U S A	2006	2006/12/13	PMC1748232		10.1073/pnas.0609227103	Proc Natl Acad Sci U S A. 2006 Dec 19;103(51):19368-73. doi: 10.1073/pnas.0609227103. Epub 2006 Dec 7.
Siberia & Wildlife	0			17626485	Characterization of H5N1 influenza viruses isolated from migratory birds in Qinghai province of China in 2006	Lei F	Avian Dis	2007	2007/07/14			10.1637/0005-2086(2007)51[568:COHIVI]2.0.CO;2	Avian Dis. 2007 Jun;51(2):568-72. doi: 10.1637/0005-2086(2007)51[568:COHIVI]2.0.CO;2.
Siberia & Wildlife	0			28900762	Novel reassortant clade 2.3.4.4 avian influenza A (H5N8) virus in a grey heron in South Korea in 2017	Woo C	Arch Virol	2017	2017/09/14	PMC5671518		10.1007/s00705-017-3547-2	Arch Virol. 2017 Dec;162(12):3887-3891. doi: 10.1007/s00705-017-3547-2. Epub 2017 Sep 12.
Siberia & Wildlife	0			18425571	Genetic characterization of avian influenza viruses isolated from waterfowl in southern part of South Korea in 2006	Kim HM	Virus Genes	2008	2008/04/22			10.1007/s11262-008-0230-4	Virus Genes. 2008 Aug;37(1):49-51. doi: 10.1007/s11262-008-0230-4. Epub 2008 Apr 19.
Siberia & Wildlife	0			25897965	Full-Genome Sequence of Influenza A(H5N8) Virus in Poultry Linked to Sequences of Strains from Asia, the Netherlands, 2014	Bouwstra R	Emerg Infect Dis	2015	2015/04/22	PMC4414092		10.3201/eid2105.141839	Emerg Infect Dis. 2015 May;21(5):872-4. doi: 10.3201/eid2105.141839.
Siberia & Wildlife	0			20521672	Genetic analysis of avian influenza virus from wild birds and mallards reared for shooting in Denmark	Handberg KJ	Avian Dis	2010	2010/06/05			10.1637/8746-032709-Reg.1	Avian Dis. 2010 Mar;54(1 Suppl):420-5. doi: 10.1637/8746-032709-Reg.1.
Siberia & Wildlife	0			20673942	Characterization of H5N1 highly pathogenic avian influenza virus strains isolated from migratory waterfowl in Mongolia on the way back from the southern Asia to their northern territory	Sakoda Y	Virology	2010	2010/08/03			10.1016/j.virol.2010.07.007	Virology. 2010 Oct 10;406(1):88-94. doi: 10.1016/j.virol.2010.07.007. Epub 2010 Jul 31.
Siberia & Wildlife	0			14618090	Phylogenetic analysis of hemagglutinin and neuraminidase genes of H9N2 viruses isolated from migratory ducks	Liu JH	Virus Genes	2003	2003/11/18			10.1023/a:1026304117797	Virus Genes. 2003 Dec;27(3):291-6. doi: 10.1023/a:1026304117797.
Siberia & Wildlife	0			26650037	Evidence for genetic variation of Eurasian avian influenza viruses of subtype H15: the first report of an H15N7 virus	Muzyka D	Arch Virol	2016	2015/12/10			10.1007/s00705-015-2629-2	Arch Virol. 2016 Mar;161(3):605-12. doi: 10.1007/s00705-015-2629-2. Epub 2015 Dec 9.
Siberia & Wildlife	0			34260340	Emerging highly pathogenic avian influenza (H5N8) virus in migratory birds in Central China, 2020	Xiong J	Emerg Microbes Infect	2021	2021/07/14	PMC8330791		10.1080/22221751.2021.1956372	Emerg Microbes Infect. 2021 Dec;10(1):1503-1506. doi: 10.1080/22221751.2021.1956372.
Alaska & Wildlife	1	1	1	22222690	Genetic structure of Pacific Flyway avian influenza viruses is shaped by geographic location, host species, and sampling period	Girard YA	Virus Genes	2012	2012/01/07			10.1007/s11262-011-0706-5	Virus Genes. 2012 Jun;44(3):415-28. doi: 10.1007/s11262-011-0706-5. Epub 2012 Jan 6.
Siberia & Avian	0			33480188	Genetic characterization of highly pathogenic avian Influenza H5Nx clade 2.3.4.4b reveals independent introductions in nigeria	Laleye AT	Transbound Emerg Dis	2021	2021/01/22			10.1111/tbed.14000	Transbound Emerg Dis. 2021 Jan 21. doi: 10.1111/tbed.14000. Online ahead of print.
Arctic & Wildlife	1	0		33033298	Data mining and model-predicting a global disease reservoir for low-pathogenic Avian Influenza (A) in the wider pacific rim using big data sets	Gulyaeva M	Sci Rep	2020	2020/10/09	PMC7545095		10.1038/s41598-020-73664-2	Sci Rep. 2020 Oct 8;10(1):16817. doi: 10.1038/s41598-020-73664-2.
Siberia & Avian	0			16447496	Library of influenza virus strains for vaccine and diagnostic use against highly pathogenic avian influenza and human pandemics	Kida H	Dev Biol (Basel)	2006	2006/02/02				Dev Biol (Basel). 2006;124:69-72.
Canada & Wildlife	1	0		20688710	Canada geese and the epidemiology of avian influenza viruses	Harris MT	J Wildl Dis	2010	2010/08/07			10.7589/0090-3558-46.3.981	J Wildl Dis. 2010 Jul;46(3):981-7. doi: 10.7589/0090-3558-46.3.981.
Siberia & Avian	0			18346824	A vaccine prepared from a non-pathogenic H7N7 virus isolated from natural reservoir conferred protective immunity against the challenge with lethal dose of highly pathogenic avian influenza virus in chickens	Sakabe S	Vaccine	2008	2008/03/19			10.1016/j.vaccine.2008.02.001	Vaccine. 2008 Apr 16;26(17):2127-34. doi: 10.1016/j.vaccine.2008.02.001. Epub 2008 Feb 22.
Siberia & Avian	0			21042591	Combining spatial-temporal and phylogenetic analysis approaches for improved understanding on global H5N1 transmission	Liang L	PLoS One	2010	2010/11/03	PMC2962646		10.1371/journal.pone.0013575	PLoS One. 2010 Oct 22;5(10):e13575. doi: 10.1371/journal.pone.0013575.
Siberia & Avian	0			26164938	[Analysis of the Genetic Evolution of Neuraminidases of Influenza A Subtype N9 Viruses]	Wan Y	Bing Du Xue Bao	2015	2015/07/14				Bing Du Xue Bao. 2015 Mar;31(2):139-44.
Siberia & Avian	0			15215686	Interregional transmission of the internal protein genes of H2 influenza virus in migratory ducks from North America to Eurasia	Liu JH	Virus Genes	2004	2004/06/25			10.1023/B:VIRU.0000032791.26573.f1	Virus Genes. 2004 Aug;29(1):81-6. doi: 10.1023/B:VIRU.0000032791.26573.f1.
Siberia & Avian	0			25945320	The European and Japanese outbreaks of H5N8 derive from a single source population providing evidence for the dispersal along the long distance bird migratory flyways	Dalby AR	PeerJ	2015	2015/05/07	PMC4419530		10.7717/peerj.934	PeerJ. 2015 Apr 30;3:e934. doi: 10.7717/peerj.934. eCollection 2015.
Siberia & Environment	0			3604506	[Characteristics of the influenza type A (H3N2) epidemic in Omsk in January 1985]	Gagarinova VM	Zh Mikrobiol Epidemiol Immunobiol	1987	1987/04/01				Zh Mikrobiol Epidemiol Immunobiol. 1987 Apr;(4):37-40.
Alaska & Wildlife	1	0		3753204	Cold-adapted reassortants of influenza A virus: pathogenicity of A/Ann Arbor/6/60 X A/Alaska/6/77 reassortant viruses in vivo and in vitro	Heath AW	Arch Virol	1986	1986/01/01			10.1007/BF01316727	Arch Virol. 1986;91(1-2):53-60. doi: 10.1007/BF01316727.
Siberia & Environment	0			942197	[Bicillin in a complex scheme for the active prophylaxis of exacerbations and the progression of chronic bronchopulmonary diseases in children]	Gavalov SM	Antibiotiki	1976	1976/06/01				Antibiotiki. 1976 Jun;21(6):552-7.
Siberia & Environment	0			6475008	[Effectiveness of the vaccine prevention of influenza in industrial enterprises in the epidemic seasons of 1980-1983]	Slobodeniuk AV	Vrach Delo	1984	1984/07/01				Vrach Delo. 1984 Jul;(7):122-3.
Siberia & Environment	0			179053	[Etiological structure of acute respiratory diseases in the influenza intraepidemic period]	Lazareva TA	Pediatriia	1976	1976/01/01				Pediatriia. 1976 Jan;(1):40-3.
Russia & Wildlife	1	0		25741006	Alterations in hemagglutinin receptor-binding specificity accompany the emergence of highly pathogenic avian influenza viruses	Heider A	J Virol	2015	2015/03/06	PMC4442535		10.1128/JVI.03304-14	J Virol. 2015 May;89(10):5395-405. doi: 10.1128/JVI.03304-14. Epub 2015 Mar 4.
Alaska & Wildlife	1	1	1	21995264	Cross-seasonal patterns of avian influenza virus in breeding and wintering migratory birds: a flyway perspective	Hill NJ	Vector Borne Zoonotic Dis	2012	2011/10/15	PMC3300065		10.1089/vbz.2010.0246	Vector Borne Zoonotic Dis. 2012 Mar;12(3):243-53. doi: 10.1089/vbz.2010.0246. Epub 2011 Oct 13.
Alaska & Wildlife	1	0		22971007	Migration strategy affects avian influenza dynamics in mallards (Anas platyrhynchos)	Hill NJ	Mol Ecol	2012	2012/09/14			10.1111/j.1365-294X.2012.05735.x	Mol Ecol. 2012 Dec;21(24):5986-99. doi: 10.1111/j.1365-294X.2012.05735.x. Epub 2012 Sep 13.
Norway & Wildlife	0			12076262	Infectious salmon anaemia virus	Rimstad E	APMIS	2002	2002/06/22			10.1034/j.1600-0463.2002.100401.x	APMIS. 2002 Apr;110(4):273-82. doi: 10.1034/j.1600-0463.2002.100401.x.
Canada & Bird	1	0		81267	Novel influenza A viruses isolated from Canadian feral ducks: including strains antigenically related to swine influenza (Hsw1N1) viruses	Hinshaw VS	J Gen Virol	1978	1978/10/01			10.1099/0022-1317-41-1-115	J Gen Virol. 1978 Oct;41(1):115-27. doi: 10.1099/0022-1317-41-1-115.
Norway & Wildlife	0			15530698	Recombinant viruses obtained from co-infection in vitro with a live vaccinia-vectored influenza vaccine and a naturally occurring cowpox virus display different plaque phenotypes and loss of the transgene	Hansen H	Vaccine	2004	2004/11/09			10.1016/j.vaccine.2004.06.032	Vaccine. 2004 Dec 9;23(4):499-506. doi: 10.1016/j.vaccine.2004.06.032.
Norway & Wildlife	0			32122608	Bearing the brunt: Mongolian khulan (Equus hemionus hemionus) are exposed to multiple influenza A strains	Soilemetzidou ES	Vet Microbiol	2020	2020/03/04			10.1016/j.vetmic.2020.108605	Vet Microbiol. 2020 Mar;242:108605. doi: 10.1016/j.vetmic.2020.108605. Epub 2020 Feb 5.
Arctic & Warming	1	0		33809626	Possible Roles of Permafrost Melting, Atmospheric Transport, and Solar Irradiance in the Development of Major Coronavirus and Influenza Pandemics	Hofmeister AM	Int J Environ Res Public Health	2021	2021/04/03	PMC8000708		10.3390/ijerph18063055	Int J Environ Res Public Health. 2021 Mar 16;18(6):3055. doi: 10.3390/ijerph18063055.
Norway & Wildlife	0			19453487	A cell-based H7N1 split influenza virion vaccine confers protection in mouse and ferret challenge models	Cox RJ	Influenza Other Respir Viruses	2009	2009/05/21	PMC4634691		10.1111/j.1750-2659.2009.00082.x	Influenza Other Respir Viruses. 2009 May;3(3):107-17. doi: 10.1111/j.1750-2659.2009.00082.x.
Norway & Wildlife	0			29248796	Multiple introductions of reassorted highly pathogenic avian influenza viruses (H5N8) clade 2.3.4.4b causing outbreaks in wild birds and poultry in Egypt	Yehia N	Infect Genet Evol	2018	2017/12/18			10.1016/j.meegid.2017.12.011	Infect Genet Evol. 2018 Mar;58:56-65. doi: 10.1016/j.meegid.2017.12.011. Epub 2017 Dec 14.
Canada & Wildlife	1	1	1	24889254	Perpetuation and reassortment of gull influenza A viruses in Atlantic North America	Huang Y	Virology	2014	2014/06/04			10.1016/j.virol.2014.04.009	Virology. 2014 May;456-457:353-63. doi: 10.1016/j.virol.2014.04.009. Epub 2014 Apr 28.
Norway & Wildlife	0			29223787	A novel peptide-based vaccine candidate with protective efficacy against influenza A in a mouse model	Herrera-Rodriguez J	Virology	2018	2017/12/11			10.1016/j.virol.2017.11.018	Virology. 2018 Feb;515:21-28. doi: 10.1016/j.virol.2017.11.018. Epub 2017 Dec 7.
Norway & Wildlife	0			22497996	The N-terminal region of the human 5-HT₂C receptor has as a cleavable signal peptide	Jahnsen JA	Eur J Pharmacol	2012	2012/04/14			10.1016/j.ejphar.2012.03.043	Eur J Pharmacol. 2012 Jun 5;684(1-3):44-50. doi: 10.1016/j.ejphar.2012.03.043. Epub 2012 Apr 3.
Norway & Wildlife	0			22503931	The predicted N-terminal signal sequence of the human α₂C-adrenoceptor does not act as a functional cleavable signal peptide	Jahnsen JA	Eur J Pharmacol	2012	2012/04/17			10.1016/j.ejphar.2012.03.044	Eur J Pharmacol. 2012 Jun 5;684(1-3):51-8. doi: 10.1016/j.ejphar.2012.03.044. Epub 2012 Apr 3.
Canada & Wildlife	1	1	1	24462905	Diverse inter-continental and host lineage reassortant avian influenza A viruses in pelagic seabirds	Huang Y	Infect Genet Evol	2014	2014/01/28			10.1016/j.meegid.2014.01.014	Infect Genet Evol. 2014 Mar;22:103-11. doi: 10.1016/j.meegid.2014.01.014. Epub 2014 Jan 23.
Greenland & Wildlife	1	1	1	23402125	Surveillance for avian influenza viruses in wild birds in Denmark and Greenland, 2007-10	Hjulsager CK	Avian Dis	2012	2013/02/14			10.1637/10190-041012-ResNote.1	Avian Dis. 2012 Dec;56(4 Suppl):992-8. doi: 10.1637/10190-041012-ResNote.1.
Norway & Avian	0			19432635	Vaccines for an influenza pandemic: scientific and political challenges	Haaheim LR	Influenza Other Respir Viruses	2007	2009/05/13	PMC4634554		10.1111/j.1750-2659.2007.00011.x	Influenza Other Respir Viruses. 2007 Mar;1(2):55-60. doi: 10.1111/j.1750-2659.2007.00011.x.
Norway & Avian	0			31842425	Tilapia Lake Virus Does Not Hemagglutinate Avian and Piscine Erythrocytes and NH(4)Cl Does Not Inhibit Viral Replication In Vitro	Chengula AA	Viruses	2019	2019/12/18	PMC6950307		10.3390/v11121152	Viruses. 2019 Dec 12;11(12):1152. doi: 10.3390/v11121152.
Norway & Avian	0			32123088	Assessing the role of live poultry trade in community-structured transmission of avian influenza in China	Yang Q	Proc Natl Acad Sci U S A	2020	2020/03/04	PMC7084072		10.1073/pnas.1906954117	Proc Natl Acad Sci U S A. 2020 Mar 17;117(11):5949-5954. doi: 10.1073/pnas.1906954117. Epub 2020 Mar 2.
Canada & Wildlife	1	0		32054908	Waterfowl occurrence and residence time as indicators of H5 and H7 avian influenza in North American Poultry	Humphreys JM	Sci Rep	2020	2020/02/15	PMC7018751		10.1038/s41598-020-59077-1	Sci Rep. 2020 Feb 13;10(1):2592. doi: 10.1038/s41598-020-59077-1.
Norway & Avian	0			23646204	Host restrictions of avian influenza viruses: in silico analysis of H13 and H16 specific signatures in the internal proteins	Tønnessen R	PLoS One	2013	2013/05/07	PMC3639990		10.1371/journal.pone.0063270	PLoS One. 2013 Apr 30;8(4):e63270. doi: 10.1371/journal.pone.0063270. Print 2013.
Norway & Avian	0			32265861	Phylogeographic Dynamics of Influenza A(H9N2) Virus Crossing Egypt	Li R	Front Microbiol	2020	2020/04/09	PMC7105594		10.3389/fmicb.2020.00392	Front Microbiol. 2020 Mar 24;11:392. doi: 10.3389/fmicb.2020.00392. eCollection 2020.
Russia & Wildlife	1	0		18590134	[Isolation of influenza virus A (Orthomyxoviridae, Influenza A virus), Dhori virus (Orthomyxoviridae, Thogotovirus), and Newcastle's disease virus (Paromyxoviridae, Avulavirus) on the Malyi Zhemchuzhnyi Island in the north-western area of the Caspian Sea]	Iashkulov KB	Vopr Virusol	2008	2008/07/02				Vopr Virusol. 2008 May-Jun;53(3):34-8.
Norway & Avian	0			19023375	[Resistance in influenza viruses]	Hungnes O	Tidsskr Nor Laegeforen	2008	2008/11/22				Tidsskr Nor Laegeforen. 2008 Nov 20;128(22):2601-6.
Norway & Avian	0			28899626	Influenza A haemagglutinin specific IgG responses in children and adults after seasonal trivalent live attenuated influenza vaccination	Islam S	Vaccine	2017	2017/09/14			10.1016/j.vaccine.2017.08.044	Vaccine. 2017 Oct 9;35(42):5666-5673. doi: 10.1016/j.vaccine.2017.08.044. Epub 2017 Sep 9.
Norway & Avian	0			21651740	Immune correlates of protection against influenza: challenges for licensure of seasonal and pandemic influenza vaccines, Miami, FL, USA, March 1-3, 2010	Haaheim LR	Influenza Other Respir Viruses	2011	2011/06/10	PMC4634548		10.1111/j.1750-2659.2011.00242.x	Influenza Other Respir Viruses. 2011 Jul;5(4):288-95. doi: 10.1111/j.1750-2659.2011.00242.x. Epub 2011 Mar 21.
Norway & Avian	0			29938233	Impact of erythrocyte species on assays for influenza serology	Trombetta CM	J Prev Med Hyg	2018	2018/06/26	PMC6009068		10.15167/2421-4248/jpmh2018.59.1.870	J Prev Med Hyg. 2018 Mar 30;59(1):E1-E7. doi: 10.15167/2421-4248/jpmh2018.59.1.870. eCollection 2018 Mar.
Russia & Wildlife	1	0		18368779	[Isolation and molecular characterization of the influenza virus A/H5N1 strains isolated during outbreak of avian influenza among birds in the European part of Russia in 2005: strain with ozeltamivir-resistance mutation was found]	Iatsyshina SB	Mol Gen Mikrobiol Virusol	2008	2008/03/29				Mol Gen Mikrobiol Virusol. 2008;(1):26-34.
Norway & Avian	0			34452430	Temporal Dynamics of Influenza A(H5N1) Subtype before and after the Emergence of H5N8	Amer F	Viruses	2021	2021/08/28	PMC8412109		10.3390/v13081565	Viruses. 2021 Aug 7;13(8):1565. doi: 10.3390/v13081565.
Norway & Avian	0			24850536	Intranasal H5N1 vaccines, adjuvanted with chitosan derivatives, protect ferrets against highly pathogenic influenza intranasal and intratracheal challenge	Mann AJ	PLoS One	2014	2014/05/23	PMC4029577		10.1371/journal.pone.0093761	PLoS One. 2014 May 21;9(5):e93761. doi: 10.1371/journal.pone.0093761. eCollection 2014.
Norway & Avian	0			23170900	A study of Chitosan and c-di-GMP as mucosal adjuvants for intranasal influenza H5N1 vaccine	Svindland SC	Influenza Other Respir Viruses	2013	2012/11/23	PMC4634239		10.1111/irv.12056	Influenza Other Respir Viruses. 2013 Nov;7(6):1181-93. doi: 10.1111/irv.12056. Epub 2012 Nov 21.
Norway & Avian	0			21600260	Intranasal c-di-GMP-adjuvanted plant-derived H5 influenza vaccine induces multifunctional Th1 CD4+ cells and strong mucosal and systemic antibody responses in mice	Madhun AS	Vaccine	2011	2011/05/24			10.1016/j.vaccine.2011.04.094	Vaccine. 2011 Jul 12;29(31):4973-82. doi: 10.1016/j.vaccine.2011.04.094. Epub 2011 May 18.
Russia & Avian	1	0		24012948	Monitoring of influenza viruses in Western Siberia in 2008-2012	Ilyicheva T	Infect Genet Evol	2013	2013/09/10			10.1016/j.meegid.2013.08.025	Infect Genet Evol. 2013 Dec;20:177-87. doi: 10.1016/j.meegid.2013.08.025. Epub 2013 Sep 5.
Norway & Avian	0			34564052	The spatiotemporal epidemiology of high pathogenicity avian influenza outbreaks in key ostrich producing areas of South Africa	Marimwe MC	Prev Vet Med	2021	2021/09/26			10.1016/j.prevetmed.2021.105474	Prev Vet Med. 2021 Aug 26;196:105474. doi: 10.1016/j.prevetmed.2021.105474. Online ahead of print.
Norway & Avian	0			22312991	Experimental inoculation of chickens with gull-derived low pathogenic avian influenza virus subtype H16N3 causes limited infection	Tønnessen R	Avian Dis	2011	2012/02/09			10.1637/9701-030411-ResNote.1	Avian Dis. 2011 Dec;55(4):680-5. doi: 10.1637/9701-030411-ResNote.1.
Norway & Avian	0			33718448	Endothelial Cells in Emerging Viral Infections	Fosse JH	Front Cardiovasc Med	2021	2021/03/15	PMC7943456		10.3389/fcvm.2021.619690	Front Cardiovasc Med. 2021 Feb 24;8:619690. doi: 10.3389/fcvm.2021.619690. eCollection 2021.
Norway & Avian	0			26147369	Matrix M H5N1 Vaccine Induces Cross-H5 Clade Humoral Immune Responses in a Randomized Clinical Trial and Provides Protection from Highly Pathogenic Influenza Challenge in Ferrets	Cox RJ	PLoS One	2015	2015/07/07	PMC4493055		10.1371/journal.pone.0131652	PLoS One. 2015 Jul 6;10(7):e0131652. doi: 10.1371/journal.pone.0131652. eCollection 2015.
Norway & Avian	0			25737202	Induction of Local Secretory IgA and Multifunctional CD4⁺ T-helper Cells Following Intranasal Immunization with a H5N1 Whole Inactivated Influenza Virus Vaccine in BALB/c Mice	Trondsen M	Scand J Immunol	2015	2015/03/05			10.1111/sji.12288	Scand J Immunol. 2015 May;81(5):305-17. doi: 10.1111/sji.12288.
Norway & Avian	0			31731037	The RISKSUR EVA tool (Survtool): A tool for the integrated evaluation of animal health surveillance systems	Peyre M	Prev Vet Med	2019	2019/11/16			10.1016/j.prevetmed.2019.104777	Prev Vet Med. 2019 Dec 1;173:104777. doi: 10.1016/j.prevetmed.2019.104777. Epub 2019 Sep 18.
Norway & Avian	0			23220419	Influenza A virus protein PB1-F2 from different strains shows distinct structural signatures	Solbak SM	Biochim Biophys Acta	2013	2012/12/11			10.1016/j.bbapap.2012.11.009	Biochim Biophys Acta. 2013 Feb;1834(2):568-82. doi: 10.1016/j.bbapap.2012.11.009. Epub 2012 Dec 7.
Norway & Avian	0			25210189	Induction of broadly reactive anti-hemagglutinin stalk antibodies by an H5N1 vaccine in humans	Nachbagauer R	J Virol	2014	2014/09/12	PMC4249097		10.1128/JVI.02133-14	J Virol. 2014 Nov;88(22):13260-8. doi: 10.1128/JVI.02133-14. Epub 2014 Sep 10.
Norway & Avian	0			19284043	A foot and mouth disease simulation exercise involving the five Nordic countries	Westergaard JM	Rev Sci Tech	2008	2009/03/17			10.20506/rst.27.3.1831	Rev Sci Tech. 2008 Dec;27(3):751-8. doi: 10.20506/rst.27.3.1831.
Norway & Avian	0			28794452	The anti-influenza M2e antibody response is promoted by XCR1 targeting in pig skin	Deloizy C	Sci Rep	2017	2017/08/11	PMC5550447		10.1038/s41598-017-07372-9	Sci Rep. 2017 Aug 9;7(1):7639. doi: 10.1038/s41598-017-07372-9.
Norway & Avian	0			28931687	A DNA Vaccine That Targets Hemagglutinin to Antigen-Presenting Cells Protects Mice against H7 Influenza	Andersen TK	J Virol	2017	2017/09/22	PMC5686743		10.1128/JVI.01340-17	J Virol. 2017 Nov 14;91(23):e01340-17. doi: 10.1128/JVI.01340-17. Print 2017 Dec 1.
Norway & Avian	0			25974265	Novel Furin Inhibitors with Potent Anti-infectious Activity	Hardes K	ChemMedChem	2015	2015/05/15			10.1002/cmdc.201500103	ChemMedChem. 2015 Jul;10(7):1218-31. doi: 10.1002/cmdc.201500103. Epub 2015 May 14.
Norway & Avian	0			24943383	An H7N1 influenza virus vaccine induces broadly reactive antibody responses against H7N9 in humans	Krammer F	Clin Vaccine Immunol	2014	2014/06/20	PMC4135918		10.1128/CVI.00272-14	Clin Vaccine Immunol. 2014 Aug;21(8):1153-63. doi: 10.1128/CVI.00272-14. Epub 2014 Jun 18.
Norway & Avian	0			28928215	Influenza Virus Hemagglutinin Stalk-Specific Antibodies in Human Serum are a Surrogate Marker for In Vivo Protection in a Serum Transfer Mouse Challenge Model	Jacobsen H	mBio	2017	2017/09/21	PMC5605943		10.1128/mBio.01463-17	mBio. 2017 Sep 19;8(5):e01463-17. doi: 10.1128/mBio.01463-17.
Norway & Avian	0			15909008	[Bird fancier's lung--an allergic alveolitis]	Al-Azawy K	Tidsskr Nor Laegeforen	2005	2005/05/24				Tidsskr Nor Laegeforen. 2005 May 19;125(10):1341-3.
Norway & Avian	0			11517321	The principle of delivery of T cell epitopes to antigen-presenting cells applied to peptides from influenza virus, ovalbumin, and hen egg lysozyme: implications for peptide vaccination	Rasmussen IB	Proc Natl Acad Sci U S A	2001	2001/08/23	PMC56955		10.1073/pnas.181336898	Proc Natl Acad Sci U S A. 2001 Aug 28;98(18):10296-301. doi: 10.1073/pnas.181336898. Epub 2001 Aug 21.
Norway & Avian	0			21864624	Evaluation of a virosomal H5N1 vaccine formulated with Matrix M™ adjuvant in a phase I clinical trial	Cox RJ	Vaccine	2011	2011/08/26			10.1016/j.vaccine.2011.08.042	Vaccine. 2011 Oct 19;29(45):8049-59. doi: 10.1016/j.vaccine.2011.08.042. Epub 2011 Aug 22.
Norway & Avian	0			22069479	Evaluation of the sublingual route for administration of influenza H5N1 virosomes in combination with the bacterial second messenger c-di-GMP	Pedersen GK	PLoS One	2011	2011/11/10	PMC3206068		10.1371/journal.pone.0026973	PLoS One. 2011;6(11):e26973. doi: 10.1371/journal.pone.0026973. Epub 2011 Nov 1.
Norway & Avian	0			22912734	Small-RNA deep sequencing reveals Arctium tomentosum as a natural host of Alstroemeria virus X and a new putative Emaravirus	Bi Y	PLoS One	2012	2012/08/23	PMC3422356		10.1371/journal.pone.0042758	PLoS One. 2012;7(8):e42758. doi: 10.1371/journal.pone.0042758. Epub 2012 Aug 17.
Norway & Avian	0			19368768	A phase I clinical trial of a PER.C6 cell grown influenza H7 virus vaccine	Cox RJ	Vaccine	2009	2009/04/17			10.1016/j.vaccine.2009.01.116	Vaccine. 2009 Mar 18;27(13):1889-97. doi: 10.1016/j.vaccine.2009.01.116. Epub 2009 Feb 2.
Norway & Avian	0			9371558	Characterization of infectious salmon anemia virus, an orthomyxo-like virus isolated from Atlantic salmon (Salmo salar L.)	Falk K	J Virol	1997	1997/11/26	PMC230202		10.1128/JVI.71.12.9016-9023.1997	J Virol. 1997 Dec;71(12):9016-23. doi: 10.1128/JVI.71.12.9016-9023.1997.
Norway & Avian	0			24137719	[New bird flu in China]	Brodwall K	Tidsskr Nor Laegeforen	2013	2013/10/19			10.4045/tidsskr.13.0877	Tidsskr Nor Laegeforen. 2013 Aug 20;133(15):1576. doi: 10.4045/tidsskr.13.0877.
Norway & Avian	0			19497252	Norwegians approve of the health authorities' strategy to communicate worst case pandemic scenarios	Wøien G	Euro Surveill	2009	2009/06/06			10.2807/ese.14.22.19231-en	Euro Surveill. 2009 Jun 4;14(22):19231. doi: 10.2807/ese.14.22.19231-en.
Norway & Bird	0			25519786	Gaps in using bronchodilators, inhaled corticosteroids and influenza vaccine among 23 high- and low-income sites	Gnatiuc L	Int J Tuberc Lung Dis	2015	2014/12/19	PMC4531306	EMS64457	10.5588/ijtld.14.0263	Int J Tuberc Lung Dis. 2015 Jan;19(1):21-30. doi: 10.5588/ijtld.14.0263.
Norway & Marine Mammals	0			21348019	A study of side-effects of Pandemrix® influenza (H1N1) vaccine on board a Norwegian naval vessel	Munch JS	Int Marit Health	2010	2011/02/25				Int Marit Health. 2010;62(4):246-50.
Norway & Marine Mammals	0			19798723	Register data suggest lower intelligence in men born the year after flu pandemic	Eriksen W	Ann Neurol	2009	2009/10/03			10.1002/ana.21702	Ann Neurol. 2009 Sep;66(3):284-9. doi: 10.1002/ana.21702.
Norway & Marine Mammals	0			9567700	[Polymer fume fever[]	Ellingsen CL	Tidsskr Nor Laegeforen	1998	1998/05/06				Tidsskr Nor Laegeforen. 1998 Mar 20;118(8):1223-4.
Russia & Avian	1	0		16981495	[Circulation of type A influenza viruses in poultry during the pre-epizootic period of 2005 in Novosibirsk region]	Iushkov IuG	Zh Mikrobiol Epidemiol Immunobiol	2006	2006/09/20				Zh Mikrobiol Epidemiol Immunobiol. 2006 Jul-Aug;(5):59-65.
Norway & Climate Change	0			30832226	Low Temperature and Low UV Indexes Correlated with Peaks of Influenza Virus Activity in Northern Europe during 2010⁻2018	Ianevski A	Viruses	2019	2019/03/06	PMC6466003		10.3390/v11030207	Viruses. 2019 Mar 1;11(3):207. doi: 10.3390/v11030207.
Norway & Warming	0			19023355	[Human anaplasmosis--a hidden disease in Norway?]	Stuen S	Tidsskr Nor Laegeforen	2008	2008/11/22				Tidsskr Nor Laegeforen. 2008 Nov 20;128(22):2579-81.
Norway & Permafrost	0			10641921	Ground penetrating radar surveys to locate 1918 Spanish flu victims in permafrost	Davis JL	J Forensic Sci	2000	2000/01/21				J Forensic Sci. 2000 Jan;45(1):68-76.
Norway & Environment	0			29248255	Estimates of global seasonal influenza-associated respiratory mortality: a modelling study	Iuliano AD	Lancet	2018	2017/12/18	PMC5935243	NIHMS962240	10.1016/S0140-6736(17)33293-2	Lancet. 2018 Mar 31;391(10127):1285-1300. doi: 10.1016/S0140-6736(17)33293-2. Epub 2017 Dec 14.
Norway & Environment	0			33076855	Risk conditions in children hospitalized with influenza in Norway, 2017-2019	Hauge SH	BMC Infect Dis	2020	2020/10/20	PMC7569759		10.1186/s12879-020-05486-6	BMC Infect Dis. 2020 Oct 19;20(1):769. doi: 10.1186/s12879-020-05486-6.
Norway & Environment	0			31950373	Seasonal and pandemic influenza during pregnancy and risk of fetal death: A Norwegian registry-based cohort study	Gunnes N	Eur J Epidemiol	2020	2020/01/18	PMC7192880		10.1007/s10654-020-00600-z	Eur J Epidemiol. 2020 Apr;35(4):371-379. doi: 10.1007/s10654-020-00600-z. Epub 2020 Jan 16.
Norway & Environment	0			31336864	Race and 1918 Influenza Pandemic in the United States: A Review of the Literature	Økland H	Int J Environ Res Public Health	2019	2019/07/25	PMC6678782		10.3390/ijerph16142487	Int J Environ Res Public Health. 2019 Jul 12;16(14):2487. doi: 10.3390/ijerph16142487.
Norway & Environment	0			31207548	Climate and influenza in Oslo: A case for vapour pressure	Kolberg ES	J Clin Virol	2019	2019/06/18			10.1016/j.jcv.2019.06.002	J Clin Virol. 2019 Aug;117:54-55. doi: 10.1016/j.jcv.2019.06.002. Epub 2019 Jun 10.
Norway & Environment	0			30948617	Evaluating costs and health consequences of sick leave strategies against pandemic and seasonal influenza in Norway using a dynamic model	Edwards CH	BMJ Open	2019	2019/04/06	PMC6500216		10.1136/bmjopen-2018-027832	BMJ Open. 2019 Apr 3;9(4):e027832. doi: 10.1136/bmjopen-2018-027832.
Norway & Environment	0			29205701	Antibody response to seasonal influenza vaccination in patients with multiple sclerosis receiving immunomodulatory therapy	Olberg HK	Eur J Neurol	2018	2017/12/06			10.1111/ene.13537	Eur J Neurol. 2018 Mar;25(3):527-534. doi: 10.1111/ene.13537. Epub 2018 Jan 6.
Norway & Environment	0			29771952	Analysis of multi-level spatial data reveals strong synchrony in seasonal influenza epidemics across Norway, Sweden, and Denmark	Morris SE	PLoS One	2018	2018/05/18	PMC5957349		10.1371/journal.pone.0197519	PLoS One. 2018 May 17;13(5):e0197519. doi: 10.1371/journal.pone.0197519. eCollection 2018.
Norway & Environment	0			32171576	Shaping meeting to explore the value of a coordinated work plan for epidemic and pandemic influenza vaccine preparedness	Ruscio B	Vaccine	2020	2020/03/16			10.1016/j.vaccine.2020.02.038	Vaccine. 2020 Apr 3;38(16):3179-3183. doi: 10.1016/j.vaccine.2020.02.038. Epub 2020 Mar 12.
Norway & Environment	0			20334732	Estimating influenza-related excess mortality and reproduction numbers for seasonal influenza in Norway, 1975-2004	Gran JM	Epidemiol Infect	2010	2010/03/26			10.1017/S0950268810000671	Epidemiol Infect. 2010 Nov;138(11):1559-68. doi: 10.1017/S0950268810000671. Epub 2010 Mar 25.
Norway & Environment	0			32624252	Predominance of influenza virus A(H3N2) 3C.2a1b and A(H1N1)pdm09 6B.1A5A genetic subclades in the WHO European Region, 2018-2019	Melidou A	Vaccine	2020	2020/07/07			10.1016/j.vaccine.2020.06.031	Vaccine. 2020 Jul 31;38(35):5707-5717. doi: 10.1016/j.vaccine.2020.06.031. Epub 2020 Jul 3.
Norway & Environment	0			32643601	Excess all-cause mortality during the COVID-19 pandemic in Europe - preliminary pooled estimates from the EuroMOMO network, March to April 2020	Vestergaard LS	Euro Surveill	2020	2020/07/10	PMC7346364		10.2807/1560-7917.ES.2020.25.26.2001214	Euro Surveill. 2020 Jul;25(26):2001214. doi: 10.2807/1560-7917.ES.2020.25.26.2001214.
Norway & Environment	0			27215504	Self-reported influenza vaccination and protective serum antibody titers in a cohort of COPD patients	Eagan TM	Respir Med	2016	2016/05/25			10.1016/j.rmed.2016.04.008	Respir Med. 2016 Jun;115:53-9. doi: 10.1016/j.rmed.2016.04.008. Epub 2016 Apr 20.
Norway & Environment	0			30180215	Spatiotemporal diffusion of influenza A (H1N1): Starting point and risk factors	da Costa ACC	PLoS One	2018	2018/09/05	PMC6122785		10.1371/journal.pone.0202832	PLoS One. 2018 Sep 4;13(9):e0202832. doi: 10.1371/journal.pone.0202832. eCollection 2018.
Norway & Environment	0			30790685	European all-cause excess and influenza-attributable mortality in the 2017/18 season: should the burden of influenza B be reconsidered?	Nielsen J	Clin Microbiol Infect	2019	2019/02/22			10.1016/j.cmi.2019.02.011	Clin Microbiol Infect. 2019 Oct;25(10):1266-1276. doi: 10.1016/j.cmi.2019.02.011. Epub 2019 Feb 18.
Norway & Environment	0			17086223	[Vaccination against influenza--why, for whom and with which vaccine?]	Bergsaker M	Tidsskr Nor Laegeforen	2006	2006/11/07				Tidsskr Nor Laegeforen. 2006 Nov 2;126(21):2814-7.
Norway & Environment	0			27123691	Pandemic vaccination strategies and influenza severe outcomes during the influenza A(H1N1)pdm09 pandemic and the post-pandemic influenza season: the Nordic experience	Gil Cuesta J	Euro Surveill	2016	2016/04/29			10.2807/1560-7917.ES.2016.21.16.30208	Euro Surveill. 2016 Apr 21;21(16). doi: 10.2807/1560-7917.ES.2016.21.16.30208.
Norway & Environment	0			27010830	Twin Peaks: A/H1N1 Pandemic Influenza Virus Infection and Vaccination in Norway, 2009-2010	Van Effelterre T	PLoS One	2016	2016/03/25	PMC4807012		10.1371/journal.pone.0151575	PLoS One. 2016 Mar 24;11(3):e0151575. doi: 10.1371/journal.pone.0151575. eCollection 2016.
Norway & Environment	0			29403115	Revision of clinical case definitions: influenza-like illness and severe acute respiratory infection	Fitzner J	Bull World Health Organ	2018	2018/02/07	PMC5791775		10.2471/BLT.17.194514	Bull World Health Organ. 2018 Feb 1;96(2):122-128. doi: 10.2471/BLT.17.194514. Epub 2017 Nov 27.
Norway & Environment	0			28424146	Excess all-cause and influenza-attributable mortality in Europe, December 2016 to February 2017	Vestergaard LS	Euro Surveill	2017	2017/04/21	PMC5388126		10.2807/1560-7917.ES.2017.22.14.30506	Euro Surveill. 2017 Apr 6;22(14):30506. doi: 10.2807/1560-7917.ES.2017.22.14.30506.
Norway & Environment	0			19107906	The design and use of an agent-based model to simulate the 1918 influenza epidemic at Norway House, Manitoba	Carpenter C	Am J Hum Biol	2009	2008/12/25			10.1002/ajhb.20857	Am J Hum Biol. 2009 May-Jun;21(3):290-300. doi: 10.1002/ajhb.20857.
Norway & Environment	0			19193257	Oseltamivir-resistant influenza viruses A (H1N1), Norway, 2007-08	Hauge SH	Emerg Infect Dis	2009	2009/02/06	PMC2657637		10.3201/eid1502.081031	Emerg Infect Dis. 2009 Feb;15(2):155-62. doi: 10.3201/eid1502.081031.
Norway & Environment	0			24404128	Guillain-Barré syndrome and adjuvanted pandemic influenza A (H1N1) 2009 vaccines: a multinational self-controlled case series in Europe	Romio S	PLoS One	2014	2014/01/10	PMC3880265		10.1371/journal.pone.0082222	PLoS One. 2014 Jan 3;9(1):e82222. doi: 10.1371/journal.pone.0082222. eCollection 2014.
Norway & Environment	0			27388678	Why might regional vaccinology networks fail? The case of the Dutch-Nordic Consortium	Hendriks J	Global Health	2016	2016/07/09	PMC4936226		10.1186/s12992-016-0176-6	Global Health. 2016 Jul 7;12(1):38. doi: 10.1186/s12992-016-0176-6.
Norway & Environment	0			8921136	Winter excess mortality: a comparison between Norway and England plus Wales	Laake K	Age Ageing	1996	1996/09/01			10.1093/ageing/25.5.343	Age Ageing. 1996 Sep;25(5):343-8. doi: 10.1093/ageing/25.5.343.
Norway & Environment	0			18394206	Modelling and prediction of weekly incidence of influenza A specimens in England and Wales	Saltyte Benth J	Epidemiol Infect	2008	2008/04/09	PMC2870790		10.1017/S0950268808000307	Epidemiol Infect. 2008 Dec;136(12):1658-66. doi: 10.1017/S0950268808000307. Epub 2008 Apr 7.
Norway & Environment	0			18278251	Progress and shortcomings in European national strategic plans for pandemic influenza	Mounier-Jack S	Bull World Health Organ	2007	2008/02/19	PMC2636305		10.2471/blt.06.039834	Bull World Health Organ. 2007 Dec;85(12):923-9. doi: 10.2471/blt.06.039834.
Norway & Environment	0			12482653	Reappearance and global spread of variants of influenza B/Victoria/2/87 lineage viruses in the 2000-2001 and 2001-2002 seasons	Shaw MW	Virology	2002	2002/12/17			10.1006/viro.2002.1719	Virology. 2002 Nov 10;303(1):1-8. doi: 10.1006/viro.2002.1719.
Norway & Environment	0			34085632	Abrupt termination of the 2019/20 influenza season following preventive measures against COVID-19 in Denmark, Norway and Sweden	Emborg HD	Euro Surveill	2021	2021/06/04	PMC8176675		10.2807/1560-7917.ES.2021.26.22.2001160	Euro Surveill. 2021 Jun;26(22):2001160. doi: 10.2807/1560-7917.ES.2021.26.22.2001160.
Norway & Environment	0			31788746	Immunogenicity of trimeric autotransporter adhesins and their potential as vaccine targets	Thibau A	Med Microbiol Immunol	2020	2019/12/03	PMC7247748		10.1007/s00430-019-00649-y	Med Microbiol Immunol. 2020 Jun;209(3):243-263. doi: 10.1007/s00430-019-00649-y. Epub 2019 Dec 1.
Norway & Environment	0			12086075	Mortality and temperature in Oslo, Norway, 1990-1995	Nafstad P	Eur J Epidemiol	2001	2002/06/28			10.1023/a:1015547012242	Eur J Epidemiol. 2001;17(7):621-7. doi: 10.1023/a:1015547012242.
Norway & Environment	0			24885662	Vaccination coverage for seasonal influenza among residents and health care workers in Norwegian nursing homes during the 2012/13 season, a cross-sectional study	Bentele H	BMC Public Health	2014	2014/06/03	PMC4049507		10.1186/1471-2458-14-434	BMC Public Health. 2014 May 9;14:434. doi: 10.1186/1471-2458-14-434.
Norway & Environment	0			28579835	Transmission of health care-associated infections from roommates and prior room occupants: a systematic review	Cohen B	Clin Epidemiol	2017	2017/06/06	PMC5448698		10.2147/CLEP.S124382	Clin Epidemiol. 2017 May 23;9:297-310. doi: 10.2147/CLEP.S124382. eCollection 2017.
Norway & Environment	0			16084634	A socially neutral disease? Individual social class, household wealth and mortality from Spanish influenza in two socially contrasting parishes in Kristiania 1918-19	Mamelund SE	Soc Sci Med	2006	2005/08/09			10.1016/j.socscimed.2005.06.051	Soc Sci Med. 2006 Feb;62(4):923-40. doi: 10.1016/j.socscimed.2005.06.051. Epub 2005 Aug 8.
Norway & Environment	0			32989148	Global COVID-19 pandemic demands joint interventions for the suppression of future waves	Li R	Proc Natl Acad Sci U S A	2020	2020/09/29	PMC7585010		10.1073/pnas.2012002117	Proc Natl Acad Sci U S A. 2020 Oct 20;117(42):26151-26157. doi: 10.1073/pnas.2012002117. Epub 2020 Sep 28.
Norway & Environment	0			19396949	Genome dynamics in major bacterial pathogens	Ambur OH	FEMS Microbiol Rev	2009	2009/04/28	PMC2734928		10.1111/j.1574-6976.2009.00173.x	FEMS Microbiol Rev. 2009 May;33(3):453-70. doi: 10.1111/j.1574-6976.2009.00173.x.
Norway & Environment	0			16357898	[Was Spanish influenza in Kristiania a socially neutral disease?]	Mamelund SE	Tidsskr Nor Laegeforen	2005	2005/12/17				Tidsskr Nor Laegeforen. 2005 Dec 15;125(24):3477-81.
Norway & Environment	0			33213683	Virological surveillance of influenza viruses in the WHO European Region in 2019/20 - impact of the COVID-19 pandemic	Melidou A	Euro Surveill	2020	2020/11/20	PMC7678039		10.2807/1560-7917.ES.2020.25.46.2001822	Euro Surveill. 2020 Nov;25(46):2001822. doi: 10.2807/1560-7917.ES.2020.25.46.2001822.
Norway & Environment	0			20738992	High prevalence of antibodies to the 2009 pandemic influenza A(H1N1) virus in the Norwegian population following a major epidemic and a large vaccination campaign in autumn 2009	Waalen K	Euro Surveill	2010	2010/08/27				Euro Surveill. 2010 Aug 5;15(31):19633.
Norway & Environment	0			29356350	1918 pandemic morbidity: The first wave hits the poor, the second wave hits the rich	Mamelund SE	Influenza Other Respir Viruses	2018	2018/01/23	PMC5907814		10.1111/irv.12541	Influenza Other Respir Viruses. 2018 May;12(3):307-313. doi: 10.1111/irv.12541. Epub 2018 Feb 6.
Norway & Environment	0			21036090	The seasonality of pandemic and non-pandemic influenzas: the roles of solar radiation and vitamin D	Juzeniene A	Int J Infect Dis	2010	2010/11/02			10.1016/j.ijid.2010.09.002	Int J Infect Dis. 2010 Dec;14(12):e1099-105. doi: 10.1016/j.ijid.2010.09.002. Epub 2010 Oct 29.
Norway & Environment	0			26475462	Coaggregation occurs between microorganisms isolated from different environments	Stevens MR	FEMS Microbiol Ecol	2015	2015/10/18			10.1093/femsec/fiv123	FEMS Microbiol Ecol. 2015 Nov;91(11):fiv123. doi: 10.1093/femsec/fiv123. Epub 2015 Oct 15.
Norway & Environment	0			6353858	Rapid diagnosis of respiratory syncytial virus and influenza A virus infections by immunofluorescence: experience with a simplified procedure for the preparation of cell smears from nasopharyngeal secretions	Anestad G	Acta Pathol Microbiol Immunol Scand B	1983	1983/08/01			10.1111/j.1699-0463.1983.tb00045.x	Acta Pathol Microbiol Immunol Scand B. 1983 Aug;91(4):267-71. doi: 10.1111/j.1699-0463.1983.tb00045.x.
Norway & Environment	0			22607966	Case registry systems for pandemic influenza A(H1N1)pdm09 in Europe: are there lessons for the future?	Whelan J	Euro Surveill	2012	2012/05/22				Euro Surveill. 2012 May 10;17(19):20167.
Norway & Environment	0			34282603	Healthcare workers' perceptions and experiences of communicating with people over 50 years of age about vaccination: a qualitative evidence synthesis	Glenton C	Cochrane Database Syst Rev	2021	2021/07/20	PMC8407331		10.1002/14651858.CD013706.pub2	Cochrane Database Syst Rev. 2021 Jul 20;7(7):CD013706. doi: 10.1002/14651858.CD013706.pub2.
Norway & Environment	0			24436455	Immunotherapies influence the influenza vaccination response in multiple sclerosis patients: an explorative study	Olberg HK	Mult Scler	2014	2014/01/18			10.1177/1352458513513970	Mult Scler. 2014 Jul;20(8):1074-80. doi: 10.1177/1352458513513970. Epub 2014 Jan 16.
Norway & Environment	0			16650650	How prepared is Europe for pandemic influenza? Analysis of national plans	Mounier-Jack S	Lancet	2006	2006/05/03			10.1016/S0140-6736(06)68511-5	Lancet. 2006 Apr 29;367(9520):1405-11. doi: 10.1016/S0140-6736(06)68511-5.
Norway & Environment	0			19331731	Oseltamivir-resistant influenza virus A (H1N1), Europe, 2007-08 season	Meijer A	Emerg Infect Dis	2009	2009/04/01	PMC2671453		10.3201/eid1504.181280	Emerg Infect Dis. 2009 Apr;15(4):552-60. doi: 10.3201/eid1504.181280.
Norway & Environment	0			23690054	Oseltamivir-resistant influenza viruses isolated in South Korea from 2005 to 2010	Cho HG	Arch Virol	2013	2013/05/22			10.1007/s00705-013-1734-3	Arch Virol. 2013 Nov;158(11):2365-70. doi: 10.1007/s00705-013-1734-3. Epub 2013 May 21.
Norway & Environment	0			22127154	Environmental release of oseltamivir from a Norwegian sewage treatment plant during the 2009 influenza A (H1N1) pandemic	Leknes H	Sci Total Environ	2012	2011/12/01			10.1016/j.scitotenv.2011.11.004	Sci Total Environ. 2012 Jan 1;414:632-8. doi: 10.1016/j.scitotenv.2011.11.004. Epub 2011 Nov 29.
Norway & Environment	0			33888523	Recommendations for respiratory syncytial virus surveillance at the national level	Teirlinck AC	Eur Respir J	2021	2021/04/23	PMC8485062		10.1183/13993003.03766-2020	Eur Respir J. 2021 Oct 1;58(3):2003766. doi: 10.1183/13993003.03766-2020. Print 2021 Sep.
Norway & Environment	0			27466385	Rapid Bedside Inactivation of Ebola Virus for Safe Nucleic Acid Tests	Rosenstierne MW	J Clin Microbiol	2016	2016/07/29	PMC5035422		10.1128/JCM.00346-16	J Clin Microbiol. 2016 Oct;54(10):2521-9. doi: 10.1128/JCM.00346-16. Epub 2016 Jul 27.
Norway & Environment	0			22253652	Influenza A(H1N1) Oseltamivir Resistant Viruses in the Netherlands During the Winter 2007/2008	Dijkstra F	Open Virol J	2011	2012/01/19	PMC3249654		10.2174/1874357901105010154	Open Virol J. 2011;5:154-62. doi: 10.2174/1874357901105010154. Epub 2011 Dec 23.
Norway & Environment	0			18502071	Acute epiglottitis in Iceland 1983-2005	Briem B	Auris Nasus Larynx	2009	2008/05/27			10.1016/j.anl.2008.03.012	Auris Nasus Larynx. 2009 Feb;36(1):46-52. doi: 10.1016/j.anl.2008.03.012. Epub 2008 May 23.
Norway & Environment	0			2824225	Surveillance of respiratory viral infections by rapid immunofluorescence diagnosis, with emphasis on virus interference	Anestad G	Epidemiol Infect	1987	1987/10/01	PMC2249295		10.1017/s0950268800068023	Epidemiol Infect. 1987 Oct;99(2):523-31. doi: 10.1017/s0950268800068023.
Norway & Environment	0			19941797	Oseltamivir-resistant influenza A(H1N1) viruses detected in Europe during season 2007-8 had epidemiologic and clinical characteristics similar to co-circulating susceptible A(H1N1) viruses	Ciancio BC	Euro Surveill	2009	2009/11/28				Euro Surveill. 2009 Nov 19;14(46):19412.
Norway & Environment	0			10851938	[Bacterial tracheitis in children]	Oymar K	Tidsskr Nor Laegeforen	2000	2000/06/14				Tidsskr Nor Laegeforen. 2000 May 10;120(12):1417-9.
Norway & Environment	0			26008750	Risk of Guillain-Barré syndrome after exposure to pandemic influenza A(H1N1)pdm09 vaccination or infection: a Norwegian population-based cohort study	Ghaderi S	Eur J Epidemiol	2016	2015/05/27			10.1007/s10654-015-0047-0	Eur J Epidemiol. 2016 Jan;31(1):67-72. doi: 10.1007/s10654-015-0047-0. Epub 2015 May 26.
Norway & Environment	0			10590109	Initial events in infectious salmon anemia virus infection: evidence for the requirement of a low-pH step	Eliassen TM	J Virol	2000	1999/12/10	PMC111531		10.1128/jvi.74.1.218-227.2000	J Virol. 2000 Jan;74(1):218-27. doi: 10.1128/jvi.74.1.218-227.2000.
Norway & Environment	0			12830254	[Mortality in Norway by time of year, day of the week and date of birth]	Brenn T	Tidsskr Nor Laegeforen	2003	2003/06/28				Tidsskr Nor Laegeforen. 2003 Jun 26;123(13-14):1826-8.
Norway & Environment	0			25534826	High frequency of enterovirus D68 in children hospitalised with respiratory illness in Norway, autumn 2014	Bragstad K	Influenza Other Respir Viruses	2015	2014/12/24	PMC4353317		10.1111/irv.12300	Influenza Other Respir Viruses. 2015 Mar;9(2):59-63. doi: 10.1111/irv.12300. Epub 2014 Dec 23.
Norway & Environment	0			21860338	RNA viruses in young Nepalese children hospitalized with severe pneumonia	Mathisen M	Pediatr Infect Dis J	2011	2011/08/24			10.1097/INF.0b013e31822f845f	Pediatr Infect Dis J. 2011 Dec;30(12):1032-6. doi: 10.1097/INF.0b013e31822f845f.
Norway & Environment	0			6305106	Viral infections of the respiratory tract in hospitalized children. A study from Oslo during a 90 months' period	Carlsen KH	Acta Paediatr Scand	1983	1983/01/01			10.1111/j.1651-2227.1983.tb09663.x	Acta Paediatr Scand. 1983 Jan;72(1):53-8. doi: 10.1111/j.1651-2227.1983.tb09663.x.
Norway & Environment	0			7843374	Norway: problems which a small and sparsely populated European country without a national vaccine production would face during a pandemic	Haaheim LR	Eur J Epidemiol	1994	1994/08/01			10.1007/BF01719694	Eur J Epidemiol. 1994 Aug;10(4):519-21. doi: 10.1007/BF01719694.
Norway & Environment	0			7797347	Respiratory virus antibodies in adults of a Norwegian community: prevalences and risk factors	Omenaas E	Int J Epidemiol	1995	1995/02/01			10.1093/ije/24.1.223	Int J Epidemiol. 1995 Feb;24(1):223-31. doi: 10.1093/ije/24.1.223.
Norway & Environment	0			19308854	Interference between outbreaks of epidemic viruses: additional Norwegian observations	Anestad G	Scand J Infect Dis	2009	2009/03/25			10.1080/00365540902849409	Scand J Infect Dis. 2009;41(5):381-2. doi: 10.1080/00365540902849409.
Norway & Environment	0			8977628	Effect of influenza virus infection on ovalbumin-specific IgE responses to inhaled antigen in the rat	Lebrec H	J Toxicol Environ Health	1996	1996/12/27			10.1080/009841096160664	J Toxicol Environ Health. 1996 Dec 27;49(6):619-30. doi: 10.1080/009841096160664.
Norway & Environment	0			34332679	Should global financing be the main priority for pandemic preparedness? - Authors' reply	Lurie N	Lancet	2021	2021/08/01			10.1016/S0140-6736(21)01382-9	Lancet. 2021 Jul 31;398(10298):388-389. doi: 10.1016/S0140-6736(21)01382-9.
Norway & Environment	0			2385772	Life-threatening Haemophilus influenzae infections in Scandinavia: a five-country analysis of the incidence and the main clinical and bacteriologic characteristics	Peltola H	Rev Infect Dis	1990	1990/07/01			10.1093/clinids/12.4.708	Rev Infect Dis. 1990 Jul-Aug;12(4):708-15. doi: 10.1093/clinids/12.4.708.
Norway & Environment	0			29274700	Erratum to "Predominance of influenza A(H3N2) virus genetic subclade 3C.2a1 during an early 2016/17 influenza season in Europe - Contribution of surveillance data from World Health Organization (WHO) European region to the WHO vaccine composition consultation for northern hemisphere 2017/18" [Vaccine 35 (2017) 4828-4835]	Melidou A	Vaccine	2018	2017/12/25			10.1016/j.vaccine.2017.12.039	Vaccine. 2018 May 3;36(19):2740-2741. doi: 10.1016/j.vaccine.2017.12.039. Epub 2017 Dec 20.
Sweden & Wildlife	0			32321814	Phylogeography and Antigenic Diversity of Low-Pathogenic Avian Influenza H13 and H16 Viruses	Verhagen JH	J Virol	2020	2020/04/24	PMC7307148		10.1128/JVI.00537-20	J Virol. 2020 Jun 16;94(13):e00537-20. doi: 10.1128/JVI.00537-20. Print 2020 Jun 16.
Sweden & Wildlife	0			27484711	Influenza A Virus in Backyard Pigs and Poultry in Rural Cambodia	Osbjer K	Transbound Emerg Dis	2017	2016/08/04			10.1111/tbed.12547	Transbound Emerg Dis. 2017 Oct;64(5):1557-1568. doi: 10.1111/tbed.12547. Epub 2016 Aug 2.
Subarctic & Environment	1	0		24678699	Decline in temperature and humidity increases the occurrence of influenza in cold climate	Jaakkola K	Environ Health	2014	2014/04/01	PMC3978084		10.1186/1476-069X-13-22	Environ Health. 2014 Mar 28;13(1):22. doi: 10.1186/1476-069X-13-22.
Alaska & Wildlife	1	0		24807362	Avian influenza virus antibodies in Pacific Coast Red Knots (Calidris canutus roselaari)	Johnson JA	J Wildl Dis	2014	2014/05/09			10.7589/2013-04-016	J Wildl Dis. 2014 Jul;50(3):671-5. doi: 10.7589/2013-04-016. Epub 2014 May 7.
Sweden & Wildlife	0			32882787	Serological Evidence of Avian Influenza in Captive Wild Birds in a Zoo and Two Safari Parks in Bangladesh	Hassan MM	Vet Sci	2020	2020/09/05	PMC7558454		10.3390/vetsci7030122	Vet Sci. 2020 Sep 1;7(3):122. doi: 10.3390/vetsci7030122.
Norway & Wildlife	1	1	0	17494599	Avian influenza virus screening in wild waterfowl in Norway, 2005	Jonassen CM	Avian Dis	2007	2007/05/15			10.1637/7555-033106R1.1	Avian Dis. 2007 Mar;51(1 Suppl):425-8. doi: 10.1637/7555-033106R1.1.
Sweden & Wildlife	0			28665497	Protein and modified vaccinia virus Ankara-based influenza virus nucleoprotein vaccines are differentially immunogenic in BALB/c mice	Altenburg AF	Clin Exp Immunol	2017	2017/07/01	PMC5588771		10.1111/cei.13004	Clin Exp Immunol. 2017 Oct;190(1):19-28. doi: 10.1111/cei.13004. Epub 2017 Jul 24.
Sweden & Wildlife	0			30111851	Characterization of avian influenza virus attachment patterns to human and pig tissues	Eriksson P	Sci Rep	2018	2018/08/17	PMC6093914		10.1038/s41598-018-29578-1	Sci Rep. 2018 Aug 15;8(1):12215. doi: 10.1038/s41598-018-29578-1.
Sweden & Wildlife	0			29407578	A rapid and transient innate immune response to avian influenza infection in mallards	Helin AS	Mol Immunol	2018	2018/02/07			10.1016/j.molimm.2018.01.012	Mol Immunol. 2018 Mar;95:64-72. doi: 10.1016/j.molimm.2018.01.012. Epub 2018 Feb 3.
Canada & Wildlife	1	0		29307740	Pathogenicity and transmissibility of three avian influenza A (H5N6) viruses isolated from wild birds	Kang Y	J Infect	2018	2018/01/09			10.1016/j.jinf.2017.12.012	J Infect. 2018 Mar;76(3):286-294. doi: 10.1016/j.jinf.2017.12.012. Epub 2018 Jan 4.
Sweden & Wildlife	0			24558492	Study of oseltamivir and zanamivir resistance-related mutations in influenza viruses isolated from wild mallards in Sweden	Orozovic G	PLoS One	2014	2014/02/22	PMC3928424		10.1371/journal.pone.0089306	PLoS One. 2014 Feb 18;9(2):e89306. doi: 10.1371/journal.pone.0089306. eCollection 2014.
Norway & Wildlife	1	0		19558648	Infectious salmon anaemia virus (ISAV) isolated from the ISA disease outbreaks in Chile diverged from ISAV isolates from Norway around 1996 and was disseminated around 2005, based on surface glycoprotein gene sequences	Kibenge FS	Virol J	2009	2009/06/30	PMC2710322		10.1186/1743-422X-6-88	Virol J. 2009 Jun 26;6:88. doi: 10.1186/1743-422X-6-88.
Sweden & Wildlife	0			31131570	Are Microneutralization and Hemagglutination Inhibition Assays Comparable? Serological Results from Influenza Experimentally Infected Mallard Ducks	Segovia KM	Avian Dis	2019	2019/05/28	PMC7213506	NIHMS1580653	10.1637/11886-042718-Reg.1	Avian Dis. 2019 Mar 1;63(sp1):138-144. doi: 10.1637/11886-042718-Reg.1.
Sweden & Wildlife	0			25904147	Influenza A virus evolution and spatio-temporal dynamics in Eurasian wild birds: a phylogenetic and phylogeographical study of whole-genome sequence data	Lewis NS	J Gen Virol	2015	2015/04/24	PMC4681060		10.1099/vir.0.000155	J Gen Virol. 2015 Aug;96(8):2050-2060. doi: 10.1099/vir.0.000155. Epub 2015 Apr 22.
Sweden & Wildlife	0			27535050	Evidence for the Introduction, Reassortment, and Persistence of Diverse Influenza A Viruses in Antarctica	Hurt AC	J Virol	2016	2016/08/19	PMC5068520		10.1128/JVI.01404-16	J Virol. 2016 Oct 14;90(21):9674-9682. doi: 10.1128/JVI.01404-16. Print 2016 Nov 1.
Sweden & Wildlife	0			26655759	How Does Sampling Methodology Influence Molecular Detection and Isolation Success in Influenza A Virus Field Studies?	Latorre-Margalef N	Appl Environ Microbiol	2015	2015/12/15	PMC4751847		10.1128/AEM.03283-15	Appl Environ Microbiol. 2015 Dec 11;82(4):1147-1153. doi: 10.1128/AEM.03283-15. Print 2016 Feb 15.
Sweden & Wildlife	0			23402133	Alternative scan-based approaches to identify space-time clusters of highly pathogenic avian influenza virus H5N1 in wild birds in Denmark and Sweden in 2006	Alkhamis M	Avian Dis	2012	2013/02/14			10.1637/10192-041012-Reg.1	Avian Dis. 2012 Dec;56(4 Suppl):1040-8. doi: 10.1637/10192-041012-Reg.1.
Sweden & Wildlife	0			21847074	Avian influenza surveillance with FTA cards: field methods, biosafety, and transportation issues solved	Kraus RH	J Vis Exp	2011	2011/08/18	PMC3211123		10.3791/2832	J Vis Exp. 2011 Aug 2;(54):2832. doi: 10.3791/2832.
Russia & Wildlife	1	0		16981506	[Epizootic situation with the avian flu in Kurgan region]	Kilevoĭ LIa	Zh Mikrobiol Epidemiol Immunobiol	2006	2006/09/20				Zh Mikrobiol Epidemiol Immunobiol. 2006 Jul-Aug;(5):101-3.
Sweden & Wildlife	0			23145046	Birds and viruses at a crossroad--surveillance of influenza A virus in Portuguese waterfowl	Tolf C	PLoS One	2012	2012/11/13	PMC3492218		10.1371/journal.pone.0049002	PLoS One. 2012;7(11):e49002. doi: 10.1371/journal.pone.0049002. Epub 2012 Nov 7.
Sweden & Wildlife	0			23307376	Pathobiology and virus shedding of low-pathogenic avian influenza virus (A/H1N1) infection in mallards exposed to oseltamivir	Bröjer C	J Wildl Dis	2013	2013/01/12			10.7589/2011-11-335	J Wildl Dis. 2013 Jan;49(1):103-13. doi: 10.7589/2011-11-335.
Russia & Wildlife	1	0		18389623	[Molecular characteristic of influenza virus A H5N1 Strains isolated from poultry in Kurgan Region in 2005]	Kiselev OI	Mol Biol (Mosk)	2008	2008/04/09				Mol Biol (Mosk). 2008 Jan-Feb;42(1):78-87.
Sweden & Wildlife	0			21900520	Rapid PCR-based molecular pathotyping of H5 and H7 avian influenza viruses	Leijon M	J Clin Microbiol	2011	2011/09/09	PMC3209088		10.1128/JCM.01179-11	J Clin Microbiol. 2011 Nov;49(11):3860-73. doi: 10.1128/JCM.01179-11. Epub 2011 Sep 7.
Sweden & Wildlife	0			23971812	Review of a new molecular virus pathotyping method in the context of bioterrorism	Leijon M	Biosecur Bioterror	2013	2013/08/27			10.1089/bsp.2012.0087	Biosecur Bioterror. 2013 Sep;11 Suppl 1:S241-6. doi: 10.1089/bsp.2012.0087.
Sweden & Avian	1	0		18837987	Molecular characterization of highly pathogenic H5N1 avian influenza viruses isolated in Sweden in 2006	Kiss I	Virol J	2008	2008/10/08	PMC2569034		10.1186/1743-422X-5-113	Virol J. 2008 Oct 6;5:113. doi: 10.1186/1743-422X-5-113.
Sweden & Wildlife	0			23150659	Assembly of subtype 1 influenza neuraminidase is driven by both the transmembrane and head domains	da Silva DV	J Biol Chem	2013	2012/11/15	PMC3537063		10.1074/jbc.M112.424150	J Biol Chem. 2013 Jan 4;288(1):644-53. doi: 10.1074/jbc.M112.424150. Epub 2012 Nov 13.
Sweden & Avian	1	0		21156041	Swine influenza viruses isolated in 1983, 2002 and 2009 in Sweden exemplify different lineages	Kiss I	Acta Vet Scand	2010	2010/12/16	PMC3019120		10.1186/1751-0147-52-65	Acta Vet Scand. 2010 Dec 14;52(1):65. doi: 10.1186/1751-0147-52-65.
Canada & Wildlife	1	0		23060517	Antibodies to avian influenza viruses in Canada geese (Branta canadensis): a potential surveillance tool?	Kistler WM	J Wildl Dis	2012	2012/10/13			10.7589/2011-02-046	J Wildl Dis. 2012 Oct;48(4):1097-101. doi: 10.7589/2011-02-046.
Russia & Wildlife	1	0		20200028	Dynamics and ecological consequences of avian influenza virus infection in greater white-fronted geese in their winter staging areas	Kleijn D	Proc Biol Sci	2010	2010/03/05	PMC2880101		10.1098/rspb.2010.0026	Proc Biol Sci. 2010 Jul 7;277(1690):2041-8. doi: 10.1098/rspb.2010.0026. Epub 2010 Mar 3.
Sweden & Wildlife	0			27860371	Epidemiological and Molecular Analysis of an Outbreak of Highly Pathogenic Avian Influenza H5N8 clade 2.3.4.4 in a German Zoo: Effective Disease Control with Minimal Culling	Globig A	Transbound Emerg Dis	2017	2016/11/19			10.1111/tbed.12570	Transbound Emerg Dis. 2017 Dec;64(6):1813-1824. doi: 10.1111/tbed.12570. Epub 2016 Nov 15.
Sweden & Wildlife	0			28664154	Geldanamycin Reduces Acute Respiratory Distress Syndrome and Promotes the Survival of Mice Infected with the Highly Virulent H5N1 Influenza Virus	Wang C	Front Cell Infect Microbiol	2017	2017/07/01	PMC5471324		10.3389/fcimb.2017.00267	Front Cell Infect Microbiol. 2017 Jun 15;7:267. doi: 10.3389/fcimb.2017.00267. eCollection 2017.
Sweden & Wildlife	0			14583155	Invasion and persistence of the neuroadapted influenza virus A/WSN/33 in the mouse olfactory system	Aronsson F	Viral Immunol	2003	2003/10/30			10.1089/088282403322396208	Viral Immunol. 2003;16(3):415-23. doi: 10.1089/088282403322396208.
Sweden & Wildlife	0			31855133	Influenza A/H4N2 mallard infection experiments further indicate zanamivir as less prone to induce environmental resistance development than oseltamivir	Tepper V	J Gen Virol	2020	2019/12/20			10.1099/jgv.0.001369	J Gen Virol. 2020 Aug;101(8):816-824. doi: 10.1099/jgv.0.001369. Epub 2019 Dec 19.
Arctic & Wildlife	1	1	0	32585505	Seroprevalence of avian influenza in Baltic common eiders (Somateria mollissima) and pink-footed geese (Anser brachyrhynchus)	Lam SS	Environ Int	2020	2020/06/26			10.1016/j.envint.2020.105873	Environ Int. 2020 Sep;142:105873. doi: 10.1016/j.envint.2020.105873. Epub 2020 Jun 22.
Sweden & Wildlife	0			21253602	Detection of resistance mutations to antivirals oseltamivir and zanamivir in avian influenza A viruses isolated from wild birds	Orozovic G	PLoS One	2011	2011/01/22	PMC3017088		10.1371/journal.pone.0016028	PLoS One. 2011 Jan 6;6(1):e16028. doi: 10.1371/journal.pone.0016028.
Canada & Wildlife	1	0		7337915	The extent and control of avian influenza in Canada	Lang G	Can Vet J	1981	1981/12/01	PMC1790007			Can Vet J. 1981 Dec;22(12):377-81.
Sweden & Avian	1	1	0	19129127	Effects of influenza A virus infection on migrating mallard ducks	Latorre-Margalef N	Proc Biol Sci	2009	2009/01/09	PMC2679067		10.1098/rspb.2008.1501	Proc Biol Sci. 2009 Mar 22;276(1659):1029-36. doi: 10.1098/rspb.2008.1501.
Sweden & Wildlife	0			21248176	Reassortant low-pathogenic avian influenza H5N2 viruses in African wild birds	Snoeck CJ	J Gen Virol	2011	2011/01/21			10.1099/vir.0.029728-0	J Gen Virol. 2011 May;92(Pt 5):1172-1183. doi: 10.1099/vir.0.029728-0. Epub 2011 Jan 19.
Sweden & Wildlife	1	1	0	24573857	Long-term variation in influenza A virus prevalence and subtype diversity in migratory mallards in northern Europe	Latorre-Margalef N	Proc Biol Sci	2014	2014/02/28	PMC3953854		10.1098/rspb.2014.0098	Proc Biol Sci. 2014 Feb 26;281(1781):20140098. doi: 10.1098/rspb.2014.0098. Print 2014 Apr 22.
Sweden & Wildlife	0			25952633	Household practices related to disease transmission between animals and humans in rural Cambodia	Osbjer K	BMC Public Health	2015	2015/05/09	PMC4427931		10.1186/s12889-015-1811-5	BMC Public Health. 2015 May 9;15:476. doi: 10.1186/s12889-015-1811-5.
Sweden & Wildlife	0			33712334	Live and Wet Markets: Food Access versus the Risk of Disease Emergence	Naguib MM	Trends Microbiol	2021	2021/03/13			10.1016/j.tim.2021.02.007	Trends Microbiol. 2021 Jul;29(7):573-581. doi: 10.1016/j.tim.2021.02.007. Epub 2021 Mar 9.
Sweden & Wildlife	0			34438666	Epidemiology, Genetic Characterization, and Pathogenesis of Avian Influenza H5N8 Viruses Circulating in Northern and Southern Parts of Egypt, 2017-2019	Tarek M	Animals (Basel)	2021	2021/08/27	PMC8388380		10.3390/ani11082208	Animals (Basel). 2021 Jul 26;11(8):2208. doi: 10.3390/ani11082208.
Sweden & Wildlife	0			29209053	Development of an influenza virus protein microarray to measure the humoral response to influenza virus infection in mallards	Meade P	Emerg Microbes Infect	2017	2017/12/07	PMC5750464		10.1038/emi.2017.98	Emerg Microbes Infect. 2017 Dec 6;6(12):e110. doi: 10.1038/emi.2017.98.
Sweden & Wildlife	1	0		28640898	Competition between influenza A virus subtypes through heterosubtypic immunity modulates re-infection and antibody dynamics in the mallard duck	Latorre-Margalef N	PLoS Pathog	2017	2017/06/23	PMC5481145		10.1371/journal.ppat.1006419	PLoS Pathog. 2017 Jun 22;13(6):e1006419. doi: 10.1371/journal.ppat.1006419. eCollection 2017 Jun.
Sweden & Wildlife	0			30269784	Detection of non-notifiable H4N6 avian influenza virus in poultry in Great Britain	Reid SM	Vet Microbiol	2018	2018/10/02			10.1016/j.vetmic.2018.08.026	Vet Microbiol. 2018 Oct;224:107-115. doi: 10.1016/j.vetmic.2018.08.026. Epub 2018 Sep 3.
Russia & Wildlife	1	1	0	27875109	Novel Reassortant Clade 2.3.4.4 Avian Influenza A(H5N8) Virus in Wild Aquatic Birds, Russia, 2016	Lee DH	Emerg Infect Dis	2017	2016/11/23	PMC5324796		10.3201/eid2302.161252	Emerg Infect Dis. 2017 Feb;23(2):359-360. doi: 10.3201/eid2302.161252. Epub 2017 Feb 15.
Sweden & Wildlife	0			19607757	Neonatal infection with neurotropic influenza A virus induces the kynurenine pathway in early life and disrupts sensorimotor gating in adult Tap1-/- mice	Asp L	Int J Neuropsychopharmacol	2010	2009/07/18	PMC2857580	NIHMS152333	10.1017/S1461145709990253	Int J Neuropsychopharmacol. 2010 May;13(4):475-85. doi: 10.1017/S1461145709990253. Epub 2009 Jul 17.
Sweden & Wildlife	0			28688117	Serologic evidence of West Nile virus and Usutu virus infections in Eurasian coots in the Netherlands	Lim SM	Zoonoses Public Health	2018	2017/07/09			10.1111/zph.12375	Zoonoses Public Health. 2018 Feb;65(1):96-102. doi: 10.1111/zph.12375. Epub 2017 Jul 7.
Sweden & Wildlife	0			34031452	Health monitoring in birds using bio-loggers and whole blood transcriptomics	Jax E	Sci Rep	2021	2021/05/25	PMC8144624		10.1038/s41598-021-90212-8	Sci Rep. 2021 May 24;11(1):10815. doi: 10.1038/s41598-021-90212-8.
Sweden & Wildlife	0			27388698	Seroprevalence of Rift Valley fever virus in sheep and goats in Zambézia, Mozambique	Blomström AL	Infect Ecol Epidemiol	2016	2016/07/09	PMC4933789		10.3402/iee.v6.31343	Infect Ecol Epidemiol. 2016 Jul 4;6:31343. doi: 10.3402/iee.v6.31343. eCollection 2016.
Sweden & Wildlife	0			29377751	A SEROLOGIC SURVEY OF PATHOGENS IN WILD BOAR ( SUS SCROFA) IN SWEDEN	Malmsten A	J Wildl Dis	2018	2018/01/30			10.7589/2017-05-120	J Wildl Dis. 2018 Apr;54(2):229-237. doi: 10.7589/2017-05-120. Epub 2018 Jan 29.
Sweden & Wildlife	0			19362585	Neonatal infection with neurotropic influenza A virus affects working memory and expression of type III Nrg1 in adult mice	Asp L	Brain Behav Immun	2009	2009/04/14			10.1016/j.bbi.2009.04.004	Brain Behav Immun. 2009 Aug;23(6):733-41. doi: 10.1016/j.bbi.2009.04.004. Epub 2009 Apr 10.
Sweden & Wildlife	0			21931841	Environmental levels of the antiviral oseltamivir induce development of resistance mutation H274Y in influenza A/H1N1 virus in mallards	Järhult JD	PLoS One	2011	2011/09/21	PMC3171471		10.1371/journal.pone.0024742	PLoS One. 2011;6(9):e24742. doi: 10.1371/journal.pone.0024742. Epub 2011 Sep 12.
Sweden & Wildlife	0			25402615	The draft genome sequence of the ferret (Mustela putorius furo) facilitates study of human respiratory disease	Peng X	Nat Biotechnol	2014	2014/11/18	PMC4262547	NIHMS637130	10.1038/nbt.3079	Nat Biotechnol. 2014 Dec;32(12):1250-5. doi: 10.1038/nbt.3079. Epub 2014 Nov 17.
Sweden & Wildlife	0			22545540	Characterization of encephalitis in wild birds naturally infected by highly pathogenic avian influenza H5N1	Bröjer C	Avian Dis	2012	2012/05/02			10.1637/9826-060111-Reg.1	Avian Dis. 2012 Mar;56(1):144-52. doi: 10.1637/9826-060111-Reg.1.
Alaska & Wildlife	1	1	1	28098546	Reoccurrence of Avian Influenza A(H5N2) Virus Clade 2.3.4.4 in Wild Birds, Alaska, USA, 2016	Lee DH	Emerg Infect Dis	2017	2017/01/19	PMC5324823		10.3201/eid2302.161616	Emerg Infect Dis. 2017 Feb;23(2):365-367. doi: 10.3201/eid2302.161616.
Sweden & Wildlife	0			23818849	Heterosubtypic immunity to influenza A virus infections in mallards may explain existence of multiple virus subtypes	Latorre-Margalef N	PLoS Pathog	2013	2013/07/03	PMC3688562		10.1371/journal.ppat.1003443	PLoS Pathog. 2013;9(6):e1003443. doi: 10.1371/journal.ppat.1003443. Epub 2013 Jun 20.
Sweden & Wildlife	0			27997047	No evidence for homosubtypic immunity of influenza H3 in Mallards following vaccination in a natural experimental system	Wille M	Mol Ecol	2017	2016/12/21	PMC5347849		10.1111/mec.13967	Mol Ecol. 2017 Mar;26(5):1420-1431. doi: 10.1111/mec.13967. Epub 2017 Feb 6.
Sweden & Wildlife	0			29129490	RNAlater(®) is a viable storage option for avian influenza sampling in logistically challenging conditions	Wille M	J Virol Methods	2018	2017/11/14			10.1016/j.jviromet.2017.11.004	J Virol Methods. 2018 Feb;252:32-36. doi: 10.1016/j.jviromet.2017.11.004. Epub 2017 Nov 10.
Sweden & Wildlife	0			26039632	IL-17A and the Promotion of Neutrophilia in Acute Exacerbation of Chronic Obstructive Pulmonary Disease	Roos AB	Am J Respir Crit Care Med	2015	2015/06/04			10.1164/rccm.201409-1689OC	Am J Respir Crit Care Med. 2015 Aug 15;192(4):428-37. doi: 10.1164/rccm.201409-1689OC.
Sweden & Wildlife	0			29883773	Direct evidence of H7N7 avian influenza virus mutation from low to high virulence on a single poultry premises during an outbreak in free range chickens in the UK, 2008	Seekings AH	Infect Genet Evol	2018	2018/06/09			10.1016/j.meegid.2018.06.005	Infect Genet Evol. 2018 Oct;64:13-31. doi: 10.1016/j.meegid.2018.06.005. Epub 2018 Jun 5.
Sweden & Wildlife	0			26077257	Influenza A(H7N9) virus acquires resistance-related neuraminidase I222T substitution when infected mallards are exposed to low levels of oseltamivir in water	Gillman A	Antimicrob Agents Chemother	2015	2015/06/17	PMC4538561		10.1128/AAC.00886-15	Antimicrob Agents Chemother. 2015 Sep;59(9):5196-202. doi: 10.1128/AAC.00886-15. Epub 2015 Jun 15.
Sweden & Wildlife	0			23951116	Resistance mutation R292K is induced in influenza A(H6N2) virus by exposure of infected mallards to low levels of oseltamivir	Gillman A	PLoS One	2013	2013/08/17	PMC3741332		10.1371/journal.pone.0071230	PLoS One. 2013 Aug 12;8(8):e71230. doi: 10.1371/journal.pone.0071230. eCollection 2013.
Sweden & Wildlife	0			20126617	Influenza virus in a natural host, the mallard: experimental infection data	Jourdain E	PLoS One	2010	2010/02/04	PMC2812492		10.1371/journal.pone.0008935	PLoS One. 2010 Jan 28;5(1):e8935. doi: 10.1371/journal.pone.0008935.
Sweden & Wildlife	0			31493311	Estimation of the number of exposed people during highly pathogenic avian influenza virus outbreaks in EU/EEA countries, October 2016-September 2018	Adlhoch C	Zoonoses Public Health	2019	2019/09/08	PMC6852165		10.1111/zph.12629	Zoonoses Public Health. 2019 Nov;66(7):874-878. doi: 10.1111/zph.12629. Epub 2019 Sep 6.
Canada & Wildlife	1	0		31054314	Intercontinental spread of Asian-origin H7 avian influenza viruses by captive bird trade in 1990's	Lee DH	Infect Genet Evol	2019	2019/05/05			10.1016/j.meegid.2019.04.028	Infect Genet Evol. 2019 Sep;73:146-150. doi: 10.1016/j.meegid.2019.04.028. Epub 2019 May 1.
Sweden & Wildlife	0			24028398	Prevalence of avian paramyxovirus type 1 in Mallards during autumn migration in the western Baltic Sea region	Tolf C	Virol J	2013	2013/09/14	PMC3847450		10.1186/1743-422X-10-285	Virol J. 2013 Sep 12;10:285. doi: 10.1186/1743-422X-10-285.
Sweden & Wildlife	0			26422258	Oseltamivir Resistance in Influenza A(H6N2) Caused by an R292K Substitution in Neuraminidase Is Not Maintained in Mallards without Drug Pressure	Gillman A	PLoS One	2015	2015/10/01	PMC4589409		10.1371/journal.pone.0139415	PLoS One. 2015 Sep 30;10(9):e0139415. doi: 10.1371/journal.pone.0139415. eCollection 2015.
Sweden & Wildlife	0			17482684	A real-time PCR assay for the monitoring of influenza A virus in wild birds	Karlsson M	J Virol Methods	2007	2007/05/08			10.1016/j.jviromet.2007.03.013	J Virol Methods. 2007 Sep;144(1-2):27-31. doi: 10.1016/j.jviromet.2007.03.013. Epub 2007 May 7.
Sweden & Wildlife	0			25616792	Oseltamivir-resistant influenza A (H1N1) virus strain with an H274Y mutation in neuraminidase persists without drug pressure in infected mallards	Gillman A	Appl Environ Microbiol	2015	2015/01/25	PMC4357928		10.1128/AEM.04034-14	Appl Environ Microbiol. 2015 Apr;81(7):2378-83. doi: 10.1128/AEM.04034-14. Epub 2015 Jan 23.
Sweden & Wildlife	0			28295019	M2e-tetramer-specific memory CD4 T cells are broadly protective against influenza infection	Eliasson DG	Mucosal Immunol	2018	2017/03/16			10.1038/mi.2017.14	Mucosal Immunol. 2018 Jan;11(1):273-289. doi: 10.1038/mi.2017.14. Epub 2017 Mar 1.
Sweden & Wildlife	0			22239235	Double-stranded RNA-induced activation of activating protein-1 promoter is differentially regulated by the non-structural protein 1 of avian influenza A viruses	Munir M	Viral Immunol	2012	2012/01/14	PMC3271375		10.1089/vim.2011.0059	Viral Immunol. 2012 Feb;25(1):79-85. doi: 10.1089/vim.2011.0059. Epub 2012 Jan 12.
Sweden & Wildlife	0			19751768	Novel means of viral antigen identification: improved detection of avian influenza viruses by proximity ligation	Schlingemann J	J Virol Methods	2010	2009/09/16			10.1016/j.jviromet.2009.09.008	J Virol Methods. 2010 Jan;163(1):116-22. doi: 10.1016/j.jviromet.2009.09.008. Epub 2009 Sep 12.
Sweden & Wildlife	0			9571735	Enteropathogenic bacteria in migrating birds arriving in Sweden	Palmgren H	Scand J Infect Dis	1997	1997/01/01			10.3109/00365549709035895	Scand J Infect Dis. 1997;29(6):565-8. doi: 10.3109/00365549709035895.
Sweden & Wildlife	0			7708765	Generation of cytotoxic and humoral immune responses by nonreplicative recombinant Semliki Forest virus	Zhou X	Proc Natl Acad Sci U S A	1995	1995/03/28	PMC42348		10.1073/pnas.92.7.3009	Proc Natl Acad Sci U S A. 1995 Mar 28;92(7):3009-13. doi: 10.1073/pnas.92.7.3009.
Sweden & Wildlife	0			16827892	Oral tolerance induction by mucosal administration of cholera toxin B-coupled antigen involves T-cell proliferation in vivo and is not affected by depletion of CD25+ T cells	George Chandy A	Immunology	2006	2006/07/11	PMC1782302		10.1111/j.1365-2567.2006.02368.x	Immunology. 2006 Jul;118(3):311-20. doi: 10.1111/j.1365-2567.2006.02368.x.
Sweden & Wildlife	0			9295044	Positive and negative thymic selection in T cell receptor-transgenic mice correlate with Nur77 mRNA expression	Xue Y	Eur J Immunol	1997	1997/08/01			10.1002/eji.1830270832	Eur J Immunol. 1997 Aug;27(8):2048-56. doi: 10.1002/eji.1830270832.
Sweden & Wildlife	0			8393798	TAP2-defective RMA-S cells present Sendai virus antigen to cytotoxic T lymphocytes	Zhou X	Eur J Immunol	1993	1993/08/01			10.1002/eji.1830230810	Eur J Immunol. 1993 Aug;23(8):1796-801. doi: 10.1002/eji.1830230810.
Sweden & Wildlife	0			19765331	No evidence of transmission of H5N1 highly pathogenic avian influenza to humans after unprotected contact with infected wild swans	Wallensten A	Epidemiol Infect	2010	2009/09/22			10.1017/S0950268809990811	Epidemiol Infect. 2010 Feb;138(2):210-3. doi: 10.1017/S0950268809990811. Epub 2009 Sep 18.
Sweden & Wildlife	0			11034371	CD8+ T cells rapidly acquire NK1.1 and NK cell-associated molecules upon stimulation in vitro and in vivo	Assarsson E	J Immunol	2000	2000/10/18			10.4049/jimmunol.165.7.3673	J Immunol. 2000 Oct 1;165(7):3673-9. doi: 10.4049/jimmunol.165.7.3673.
Sweden & Wildlife	0			18067847	H5N1 in wild and domestic birds in Europe--remaining vigilant in response to an ongoing public health threat	Needham H	Euro Surveill	2007	2007/12/11			10.2807/esw.12.49.03324-en	Euro Surveill. 2007 Dec 6;12(12):E071206.1. doi: 10.2807/esw.12.49.03324-en.
Sweden & Wildlife	0			19669614	The "human influenza receptor" Neu5Ac alpha2,6Gal is expressed among different taxa of wild birds	Ellström P	Arch Virol	2009	2009/08/12			10.1007/s00705-009-0476-8	Arch Virol. 2009;154(9):1533-7. doi: 10.1007/s00705-009-0476-8. Epub 2009 Aug 9.
Sweden & Wildlife	0			24885647	Infected or not: are PCR-positive oropharyngeal swabs indicative of low pathogenic influenza A virus infection in the respiratory tract of Mallard Anas platyrhynchos?	Wille M	Vet Res	2014	2014/06/03	PMC4046040		10.1186/1297-9716-45-53	Vet Res. 2014 May 14;45(1):53. doi: 10.1186/1297-9716-45-53.
Sweden & Wildlife	0			7927765	Protein D, the glycerophosphodiester phosphodiesterase from Haemophilus influenzae with affinity for human immunoglobulin D, influences virulence in a rat otitis model	Janson H	Infect Immun	1994	1994/11/01	PMC303197		10.1128/iai.62.11.4848-4854.1994	Infect Immun. 1994 Nov;62(11):4848-54. doi: 10.1128/iai.62.11.4848-4854.1994.
Sweden & Avian	0			30815236	Avian influenza viruses at the wild-domestic bird interface in Egypt	Naguib MM	Infect Ecol Epidemiol	2019	2019/03/01	PMC6383604		10.1080/20008686.2019.1575687	Infect Ecol Epidemiol. 2019 Feb 20;9(1):1575687. doi: 10.1080/20008686.2019.1575687. eCollection 2019.
Sweden & Avian	0			33207803	Prevalence and Distribution of Avian Influenza Viruses in Domestic Ducks at the Waterfowl-Chicken Interface in Wetlands	Hassan MM	Pathogens	2020	2020/11/19	PMC7709030		10.3390/pathogens9110953	Pathogens. 2020 Nov 16;9(11):953. doi: 10.3390/pathogens9110953.
Sweden & Avian	0			32605194	Coronavirus Disease Pandemic (COVID-19): Challenges and a Global Perspective	Malik YS	Pathogens	2020	2020/07/02	PMC7400054		10.3390/pathogens9070519	Pathogens. 2020 Jun 28;9(7):519. doi: 10.3390/pathogens9070519.
Sweden & Avian	0			32492967	Prevalence and Diversity of Avian Influenza Virus Hemagglutinin Sero-Subtypes in Poultry and Wild Birds in Bangladesh	Hassan MM	Vet Sci	2020	2020/06/05	PMC7355479		10.3390/vetsci7020073	Vet Sci. 2020 Jun 1;7(2):73. doi: 10.3390/vetsci7020073.
Sweden & Avian	0			29495276	Avian Respiratory Coinfection and Impact on Avian Influenza Pathogenicity in Domestic Poultry: Field and Experimental Findings	Samy A	Vet Sci	2018	2018/03/03	PMC5876583		10.3390/vetsci5010023	Vet Sci. 2018 Feb 24;5(1):23. doi: 10.3390/vetsci5010023.
Sweden & Avian	0			16459194	Avian influenza and the brain--comments on the occasion of resurrection of the Spanish flu virus	Kristensson K	Brain Res Bull	2006	2006/02/07			10.1016/j.brainresbull.2005.11.022	Brain Res Bull. 2006 Feb 15;68(6):406-13. doi: 10.1016/j.brainresbull.2005.11.022. Epub 2005 Dec 21.
Sweden & Avian	0			31057520	Attachment Patterns of Human and Avian Influenza Viruses to Trachea and Colon of 26 Bird Species - Support for the Community Concept	Eriksson P	Front Microbiol	2019	2019/05/07	PMC6482220		10.3389/fmicb.2019.00815	Front Microbiol. 2019 Apr 18;10:815. doi: 10.3389/fmicb.2019.00815. eCollection 2019.
Sweden & Avian	0			19623743	New developments in the diagnosis of avian influenza	Belák S	Rev Sci Tech	2009	2009/07/24			10.20506/rst.28.1.1853	Rev Sci Tech. 2009 Apr;28(1):233-43. doi: 10.20506/rst.28.1.1853.
Sweden & Avian	0			30827377	Chicken anaemia virus enhances and prolongs subsequent avian influenza (H9N2) and infectious bronchitis viral infections	Erfan AM	Vet Microbiol	2019	2019/03/05			10.1016/j.vetmic.2019.01.024	Vet Microbiol. 2019 Mar;230:123-129. doi: 10.1016/j.vetmic.2019.01.024. Epub 2019 Feb 2.
Sweden & Avian	0			32155863	Wild Birds in Live Birds Markets: Potential Reservoirs of Enzootic Avian Influenza Viruses and Antimicrobial Resistant Enterobacteriaceae in Northern Egypt	Nabil NM	Pathogens	2020	2020/03/12	PMC7157678		10.3390/pathogens9030196	Pathogens. 2020 Mar 6;9(3):196. doi: 10.3390/pathogens9030196.
Sweden & Avian	0			33329501	A Comparative Study of the Innate Humoral Immune Response to Avian Influenza Virus in Wild and Domestic Mallards	van Dijk JGB	Front Microbiol	2020	2020/12/17	PMC7733965		10.3389/fmicb.2020.608274	Front Microbiol. 2020 Nov 30;11:608274. doi: 10.3389/fmicb.2020.608274. eCollection 2020.
Sweden & Avian	0			27733236	Risk of resistant avian influenza A virus in wild waterfowl as a result of environmental release of oseltamivir	Gillman A	Infect Ecol Epidemiol	2016	2016/10/14	PMC5061866		10.3402/iee.v6.32870	Infect Ecol Epidemiol. 2016 Oct 11;6:32870. doi: 10.3402/iee.v6.32870. eCollection 2016.
Sweden & Avian	0			19453419	Sialic acid tissue distribution and influenza virus tropism	Kumlin U	Influenza Other Respir Viruses	2008	2009/05/21	PMC4941897		10.1111/j.1750-2659.2008.00051.x	Influenza Other Respir Viruses. 2008 Sep;2(5):147-54. doi: 10.1111/j.1750-2659.2008.00051.x.
Sweden & Avian	0			32526101	Biosecurity risk factors for highly pathogenic avian influenza (H5N8) virus infection in duck farms, France	Guinat C	Transbound Emerg Dis	2020	2020/06/12			10.1111/tbed.13672	Transbound Emerg Dis. 2020 Nov;67(6):2961-2970. doi: 10.1111/tbed.13672. Epub 2020 Jul 2.
Sweden & Avian	0			19026689	The rapid molecular subtyping and pathotyping of avian influenza viruses	Yacoub A	J Virol Methods	2009	2008/11/26			10.1016/j.jviromet.2008.10.019	J Virol Methods. 2009 Mar;156(1-2):157-61. doi: 10.1016/j.jviromet.2008.10.019. Epub 2008 Dec 6.
Sweden & Avian	0			24047399	Genetic and biological characterisation of an avian-like H1N2 swine influenza virus generated by reassortment of circulating avian-like H1N1 and H3N2 subtypes in Denmark	Trebbien R	Virol J	2013	2013/09/20	PMC3851529		10.1186/1743-422X-10-290	Virol J. 2013 Sep 18;10:290. doi: 10.1186/1743-422X-10-290.
Sweden & Avian	0			33428819	Molecular detection of influenza A viruses and H5 subtype among migratory Amur falcons (Falco amurensis) and captive birds of prey	El Zowalaty ME	Transbound Emerg Dis	2021	2021/01/11			10.1111/tbed.13988	Transbound Emerg Dis. 2021 Jan 11. doi: 10.1111/tbed.13988. Online ahead of print.
Sweden & Avian	0			15766653	Avian influenza and sialic acid receptors: more than meets the eye?	Olofsson S	Lancet Infect Dis	2005	2005/03/16			10.1016/S1473-3099(05)01311-3	Lancet Infect Dis. 2005 Mar;5(3):184-8. doi: 10.1016/S1473-3099(05)01311-3.
Sweden & Avian	0			10799782	Studies on influenza viruses H10N4 and H10N7 of avian origin in mink	Englund L	Vet Microbiol	2000	2000/05/09			10.1016/s0378-1135(00)00170-x	Vet Microbiol. 2000 May 22;74(1-2):101-7. doi: 10.1016/s0378-1135(00)00170-x.
Sweden & Avian	0			16530581	Cytotoxic therapy for severe avian influenza A (H5N1) infection	Henter JI	Lancet	2006	2006/03/15			10.1016/S0140-6736(06)68232-9	Lancet. 2006 Mar 11;367(9513):870-3. doi: 10.1016/S0140-6736(06)68232-9.
Sweden & Avian	0			27211899	Global epidemiology of avian influenza A H5N1 virus infection in humans, 1997-2015: a systematic review of individual case data	Lai S	Lancet Infect Dis	2016	2016/05/24	PMC4933299	NIHMS789852	10.1016/S1473-3099(16)00153-5	Lancet Infect Dis. 2016 Jul;16(7):e108-e118. doi: 10.1016/S1473-3099(16)00153-5. Epub 2016 May 17.
Sweden & Avian	0			22389376	Composting for avian influenza virus elimination	Elving J	Appl Environ Microbiol	2012	2012/03/06	PMC3346479		10.1128/AEM.07947-11	Appl Environ Microbiol. 2012 May;78(9):3280-5. doi: 10.1128/AEM.07947-11. Epub 2012 Mar 2.
Sweden & Avian	0			20837063	Degenerate primers for PCR amplification and sequencing of the avian influenza A neuraminidase gene	Orozovic G	J Virol Methods	2010	2010/09/15			10.1016/j.jviromet.2010.09.006	J Virol Methods. 2010 Dec;170(1-2):94-8. doi: 10.1016/j.jviromet.2010.09.006. Epub 2010 Sep 15.
Norway & Avian	1	1	1	31660964	No evidence of avian influenza antibodies in two species of raptor nestlings inhabiting Norway	Lee MM	BMC Vet Res	2019	2019/10/30	PMC6816168		10.1186/s12917-019-2133-0	BMC Vet Res. 2019 Oct 28;15(1):375. doi: 10.1186/s12917-019-2133-0.
Russia & Avian	1	0		33400615	Emergence and spread of novel H5N8, H5N5 and H5N1 clade 2.3.4.4 highly pathogenic avian influenza in 2020	Lewis NS	Emerg Microbes Infect	2021	2021/01/05	PMC7832535		10.1080/22221751.2021.1872355	Emerg Microbes Infect. 2021 Dec;10(1):148-151. doi: 10.1080/22221751.2021.1872355.
Sweden & Avian	0			27983512	Highly pathogenic avian influenza A(H5N8) outbreaks: protection and management of exposed people in Europe, 2014/15 and 2016	Adlhoch C	Euro Surveill	2016	2016/12/17	PMC5291128		10.2807/1560-7917.ES.2016.21.49.30419	Euro Surveill. 2016 Dec 8;21(49):30419. doi: 10.2807/1560-7917.ES.2016.21.49.30419.
Sweden & Avian	0			2167060	Close relationship between mink influenza (H10N4) and concomitantly circulating avian influenza viruses	Berg M	Arch Virol	1990	1990/01/01			10.1007/BF01318353	Arch Virol. 1990;113(1-2):61-71. doi: 10.1007/BF01318353.
Sweden & Avian	0			31216712	Isolation of a Novel Reassortant Highly Pathogenic Avian Influenza (H5N2) Virus in Egypt	Hagag NM	Viruses	2019	2019/06/21	PMC6631101		10.3390/v11060565	Viruses. 2019 Jun 18;11(6):565. doi: 10.3390/v11060565.
Sweden & Avian	0			31002703	The epidemic potential of avian influenza A (H7N9) virus in humans in mainland China: A two-stage risk analysis	Shan X	PLoS One	2019	2019/04/20	PMC6474630		10.1371/journal.pone.0215857	PLoS One. 2019 Apr 19;14(4):e0215857. doi: 10.1371/journal.pone.0215857. eCollection 2019.
Sweden & Avian	0			26612517	Prediction of the next highly pathogenic avian influenza pandemic that can cause illness in humans	Zhang ZW	Infect Dis Poverty	2015	2015/11/28	PMC4661964		10.1186/s40249-015-0083-8	Infect Dis Poverty. 2015 Nov 27;4:50. doi: 10.1186/s40249-015-0083-8.
Sweden & Avian	0			29799746	Discovery of Highly Potent Pinanamine-Based Inhibitors against Amantadine- and Oseltamivir-Resistant Influenza A Viruses	Zhao X	J Med Chem	2018	2018/05/26	PMC6496959	NIHMS1017109	10.1021/acs.jmedchem.8b00042	J Med Chem. 2018 Jun 28;61(12):5187-5198. doi: 10.1021/acs.jmedchem.8b00042. Epub 2018 Jun 11.
Sweden & Avian	0			26356095	Mallard or chicken? Comparing the isolation of avian influenza A viruses in embryonated Mallard and chicken eggs	Järhult JD	Infect Ecol Epidemiol	2015	2015/09/11	PMC4565061		10.3402/iee.v5.28458	Infect Ecol Epidemiol. 2015 Sep 8;5:28458. doi: 10.3402/iee.v5.28458. eCollection 2015.
Sweden & Avian	0			29904657	Expression of immune genes RIG-I and Mx in mallard ducks infected with low pathogenic avian influenza (LPAI): A dataset	Helin AS	Data Brief	2018	2018/06/16	PMC5998173		10.1016/j.dib.2018.04.061	Data Brief. 2018 Apr 23;18:1562-1566. doi: 10.1016/j.dib.2018.04.061. eCollection 2018 Jun.
Sweden & Avian	0			21632557	Alleles A and B of non-structural protein 1 of avian influenza A viruses differentially inhibit beta interferon production in human and mink lung cells	Munir M	J Gen Virol	2011	2011/06/03			10.1099/vir.0.031716-0	J Gen Virol. 2011 Sep;92(Pt 9):2111-2121. doi: 10.1099/vir.0.031716-0. Epub 2011 Jun 1.
Sweden & Avian	0			29325601	Evaluation of ELISA and haemagglutination inhibition as screening tests in serosurveillance for H5/H7 avian influenza in commercial chicken flocks	Arnold ME	Epidemiol Infect	2018	2018/01/13			10.1017/S0950268817002898	Epidemiol Infect. 2018 Feb;146(3):306-313. doi: 10.1017/S0950268817002898. Epub 2018 Jan 12.
Sweden & Avian	0			24507469	Laboratory preparedness in EU/EEA countries for detection of novel avian influenza A(H7N9) virus, May 2013	Broberg E	Euro Surveill	2014	2014/02/11	PMC4684096	EMS66291	10.2807/1560-7917.es2014.19.4.20682	Euro Surveill. 2014 Jan 30;19(4):20682. doi: 10.2807/1560-7917.es2014.19.4.20682.
Russia & Wildlife	1	0		24885233	Global spatiotemporal and genetic footprint of the H5N1 avian influenza virus	Li R	Int J Health Geogr	2014	2014/06/03	PMC4059878		10.1186/1476-072X-13-14	Int J Health Geogr. 2014 May 21;13:14. doi: 10.1186/1476-072X-13-14.
Siberia & Avian	1	0		25061965	Global and local persistence of influenza A(H5N1) virus	Li X	Emerg Infect Dis	2014	2014/07/26	PMC4111173		10.3201/eid2008.130910	Emerg Infect Dis. 2014 Aug;20(8):1287-95. doi: 10.3201/eid2008.130910.
Sweden & Avian	0			25887656	Published sequences do not support transfer of oseltamivir resistance mutations from avian to human influenza A virus strains	Norberg P	BMC Infect Dis	2015	2015/04/19	PMC4387679		10.1186/s12879-015-0860-9	BMC Infect Dis. 2015 Mar 28;15:162. doi: 10.1186/s12879-015-0860-9.
Sweden & Avian	0			28956231	Avian influenza epidemiology in semi-intensive free ranging duck flocks of the Moyingyi Wetland in Bago East District, Myanmar	Cristalli A	Trop Anim Health Prod	2018	2017/09/29			10.1007/s11250-017-1423-4	Trop Anim Health Prod. 2018 Feb;50(2):251-257. doi: 10.1007/s11250-017-1423-4. Epub 2017 Sep 27.
Sweden & Avian	0			17213569	Highly pathogenic avian influenza A/H5N1-update and overview of 2006	Influenza team	Euro Surveill	2006	2007/01/11			10.2807/esw.11.51.03098-en	Euro Surveill. 2006 Dec 21;11(12):E061221.1. doi: 10.2807/esw.11.51.03098-en.
Sweden & Avian	0			25597538	Comparing introduction to Europe of highly pathogenic avian influenza viruses A(H5N8) in 2014 and A(H5N1) in 2005	Adlhoch C	Euro Surveill	2014	2015/01/20			10.2807/1560-7917.es2014.19.50.20996	Euro Surveill. 2014 Dec 18;19(50):20996. doi: 10.2807/1560-7917.es2014.19.50.20996.
Sweden & Avian	0			18353937	Simultaneous genotyping of all hemagglutinin and neuraminidase subtypes of avian influenza viruses by use of padlock probes	Gyarmati P	J Clin Microbiol	2008	2008/03/21	PMC2395064		10.1128/JCM.02292-07	J Clin Microbiol. 2008 May;46(5):1747-51. doi: 10.1128/JCM.02292-07. Epub 2008 Mar 19.
Sweden & Avian	0			24455106	Detection of antibodies against H5 and H7 strains in birds: evaluation of influenza pseudovirus particle neutralization tests	Wallerström S	Infect Ecol Epidemiol	2014	2014/01/24	PMC3895261		10.3402/iee.v4.23011	Infect Ecol Epidemiol. 2014 Jan 15;4. doi: 10.3402/iee.v4.23011. eCollection 2014 Jan 15.
Sweden & Avian	0			23725867	Outbreak with a novel avian influenza A(H7N9) virus in China--scenarios and triggers for assessing risks and planning responses in the European Union, May 2013	Schenk C	Euro Surveill	2013	2013/06/04				Euro Surveill. 2013 May 16;18(20):20482.
Sweden & Avian	0			21810221	Non-structural protein 1 of avian influenza A viruses differentially inhibit NF-κB promoter activation	Munir M	Virol J	2011	2011/08/04	PMC3161964		10.1186/1743-422X-8-383	Virol J. 2011 Aug 2;8:383. doi: 10.1186/1743-422X-8-383.
Subarctic & Wildlife	1	1	1	28092966	Avian influenza prevalence among hunter-harvested birds in a remote Canadian First Nation community	Liberda EN	Rural Remote Health	2017	2017/01/18			10.22605/rrh3864	Rural Remote Health. 2017 Jan-Mar;17(1):3864. doi: 10.22605/rrh3864. Epub 2017 Jan 11.
Sweden & Avian	0			20521678	Phylogenetic analysis of the hemagglutinin gene of low pathogenic avian influenza virus H7N7 strains in mallards in Northern Europe	Metreveli G	Avian Dis	2010	2010/06/05			10.1637/8691-031309-ResNote.1	Avian Dis. 2010 Mar;54(1 Suppl):453-6. doi: 10.1637/8691-031309-ResNote.1.
Sweden & Avian	0			29455027	Electrochemical detection of influenza virus H9N2 based on both immunomagnetic extraction and gold catalysis using an immobilization-free screen printed carbon microelectrode	Sayhi M	Biosens Bioelectron	2018	2018/02/19			10.1016/j.bios.2018.02.018	Biosens Bioelectron. 2018 Jun 1;107:170-177. doi: 10.1016/j.bios.2018.02.018. Epub 2018 Feb 7.
Sweden & Avian	0			27473048	Identification of combinatorial host-specific signatures with a potential to affect host adaptation in influenza A H1N1 and H3N2 subtypes	Khaliq Z	BMC Genomics	2016	2016/07/31	PMC4966792		10.1186/s12864-016-2919-4	BMC Genomics. 2016 Jul 29;17:529. doi: 10.1186/s12864-016-2919-4.
Sweden & Avian	0			23593303	European H16N3 gull influenza virus attaches to the human respiratory tract and eye	Lindskog C	PLoS One	2013	2013/04/18	PMC3620227		10.1371/journal.pone.0060757	PLoS One. 2013 Apr 8;8(4):e60757. doi: 10.1371/journal.pone.0060757. Print 2013.
Sweden & Avian	0			22442675	Transient expression of hemagglutinin antigen from low pathogenic avian influenza A (H7N7) in Nicotiana benthamiana	Kanagarajan S	PLoS One	2012	2012/03/24	PMC3307706		10.1371/journal.pone.0033010	PLoS One. 2012;7(3):e33010. doi: 10.1371/journal.pone.0033010. Epub 2012 Mar 19.
Sweden & Avian	0			30369095	Endemic situation of multiple avian influenza strains in poultry in Egypt: A continuing nightmare	Naguib MM	Zoonoses Public Health	2018	2018/10/29			10.1111/zph.12486	Zoonoses Public Health. 2018 Dec;65(8):908-910. doi: 10.1111/zph.12486.
Sweden & Avian	0			23971811	Development and optimization of a biopreparedness protocol for extracting and detecting avian influenza virus in broiler chicken meat	Di Pasquale S	Biosecur Bioterror	2013	2013/08/27			10.1089/bsp.2012.0078	Biosecur Bioterror. 2013 Sep;11 Suppl 1:S235-40. doi: 10.1089/bsp.2012.0078.
Norway & Wildlife	1	0		16398331	Screening of feral pigeon (Colomba livia), mallard (Anas platyrhynchos) and graylag goose (Anser anser) populations for Campylobacter spp., Salmonella spp., avian influenza virus and avian paramyxovirus	Lillehaug A	Acta Vet Scand	2005	2006/01/10	PMC1618971		10.1186/1751-0147-46-193	Acta Vet Scand. 2005;46(4):193-202. doi: 10.1186/1751-0147-46-193.
Sweden & Avian	0			29370857	Environmental resistance development to influenza antivirals: a case exemplifying the need for a multidisciplinary One Health approach including physicians	Järhult JD	Acta Vet Scand	2018	2018/01/27	PMC5784702		10.1186/s13028-018-0360-1	Acta Vet Scand. 2018 Jan 25;60(1):6. doi: 10.1186/s13028-018-0360-1.
Sweden & Avian	0			22957124	Oseltamivir (Tamiflu(®)) in the environment, resistance development in influenza A viruses of dabbling ducks and the risk of transmission of an oseltamivir-resistant virus to humans - a review	Järhult JD	Infect Ecol Epidemiol	2012	2012/09/08	PMC3426320		10.3402/iee.v2i0.18385	Infect Ecol Epidemiol. 2012;2. doi: 10.3402/iee.v2i0.18385. Epub 2012 Jun 21.
Finland & Wildlife	1	1	0	18307758	Orthomyxo-, paramyxo- and flavivirus infections in wild waterfowl in Finland	Lindh E	Virol J	2008	2008/03/01	PMC2292701		10.1186/1743-422X-5-35	Virol J. 2008 Feb 28;5:35. doi: 10.1186/1743-422X-5-35.
Sweden & Avian	0			20591155	Full genome comparison and characterization of avian H10 viruses with different pathogenicity in Mink (Mustela vison) reveals genetic and functional differences in the non-structural gene	Zohari S	Virol J	2010	2010/07/02	PMC2909961		10.1186/1743-422X-7-145	Virol J. 2010 Jun 30;7:145. doi: 10.1186/1743-422X-7-145.
Sweden & Avian	0			27179509	Surveillance and response systems for elimination of tropical diseases: summary of a thematic series in Infectious Diseases of Poverty	Zhou X	Infect Dis Poverty	2016	2016/05/16	PMC4868018		10.1186/s40249-016-0144-7	Infect Dis Poverty. 2016 May 14;5(1):49. doi: 10.1186/s40249-016-0144-7.
Sweden & Avian	0			32325980	Systematic Review of Important Viral Diseases in Africa in Light of the 'One Health' Concept	Chauhan RP	Pathogens	2020	2020/04/25	PMC7238228		10.3390/pathogens9040301	Pathogens. 2020 Apr 20;9(4):301. doi: 10.3390/pathogens9040301.
Sweden & Avian	0			3407149	The structure of serotype H10 hemagglutinin of influenza A virus: comparison of an apathogenic avian and a mammalian strain pathogenic for mink	Feldmann H	Virology	1988	1988/08/01			10.1016/0042-6822(88)90586-7	Virology. 1988 Aug;165(2):428-37. doi: 10.1016/0042-6822(88)90586-7.
Sweden & Avian	0			34452300	Influenza Virus Infections in Cats	Frymus T	Viruses	2021	2021/08/28	PMC8402716		10.3390/v13081435	Viruses. 2021 Jul 23;13(8):1435. doi: 10.3390/v13081435.
Sweden & Avian	0			31321078	Novel hepatitis D-like agents in vertebrates and invertebrates	Chang WS	Virus Evol	2019	2019/07/20	PMC6628682		10.1093/ve/vez021	Virus Evol. 2019 Jul 15;5(2):vez021. doi: 10.1093/ve/vez021. eCollection 2019 Jul.
Sweden & Avian	0			22036312	Inefficient splicing of segment 7 and 8 mRNAs is an inherent property of influenza virus A/Brevig Mission/1918/1 (H1N1) that causes elevated expression of NS1 protein	Backström Winquist E	Virology	2012	2011/11/01			10.1016/j.virol.2011.10.004	Virology. 2012 Jan 5;422(1):46-58. doi: 10.1016/j.virol.2011.10.004. Epub 2011 Oct 28.
Sweden & Avian	0			9638139	Two avian H10 influenza A virus strains with different pathogenicity for mink (Mustela vison)	Englund L	Arch Virol	1998	1998/06/25			10.1007/s007050050321	Arch Virol. 1998;143(4):653-66. doi: 10.1007/s007050050321.
Sweden & Avian	0			21515734	Ammonia disinfection of hatchery waste for elimination of single-stranded RNA viruses	Emmoth E	Appl Environ Microbiol	2011	2011/04/26	PMC3131629		10.1128/AEM.02990-10	Appl Environ Microbiol. 2011 Jun;77(12):3960-6. doi: 10.1128/AEM.02990-10. Epub 2011 Apr 22.
Sweden & Avian	0			21194454	Differences in the ability to suppress interferon β production between allele A and allele B NS1 proteins from H10 influenza A viruses	Zohari S	Virol J	2010	2011/01/04	PMC3022685		10.1186/1743-422X-7-376	Virol J. 2010 Dec 31;7:376. doi: 10.1186/1743-422X-7-376.
Sweden & Avian	0			18172752	Genetic characterization of the NS gene indicates co-circulation of two sub-lineages of highly pathogenic avian influenza virus of H5N1 subtype in Northern Europe in 2006	Zohari S	Virus Genes	2008	2008/01/04			10.1007/s11262-007-0188-7	Virus Genes. 2008 Feb;36(1):117-25. doi: 10.1007/s11262-007-0188-7. Epub 2008 Jan 3.
Sweden & Avian	0			15190606	[Role of the European Scientific Work Group on Influenza in the battle against influenza]	Brydak LB	Pol Merkur Lekarski	2004	2004/06/12				Pol Merkur Lekarski. 2004 Mar;16(93):265-70.
Sweden & Avian	0			17224207	Molecular diagnosis of viral diseases, present trends and future aspects A view from the OIE Collaborating Centre for the Application of Polymerase Chain Reaction Methods for Diagnosis of Viral Diseases in Veterinary Medicine	Belák S	Vaccine	2007	2007/01/17	PMC7115665		10.1016/j.vaccine.2006.11.068	Vaccine. 2007 Jul 26;25(30):5444-52. doi: 10.1016/j.vaccine.2006.11.068. Epub 2006 Dec 28.
Sweden & Avian	0			4062564	An avian influenza A virus killing a mammalian species--the mink. Brief report	Klingeborn B	Arch Virol	1985	1985/01/01			10.1007/BF01309839	Arch Virol. 1985;86(3-4):347-51. doi: 10.1007/BF01309839.
Sweden & Avian	0			18084935	Experiences of an OIE Collaborating Centre in molecular diagnosis of transboundary animal diseases: a review	Belák S	Dev Biol (Basel)	2007	2007/12/19				Dev Biol (Basel). 2007;128:103-12.
Sweden & Avian	0			16401820	Is exposure to sick or dead poultry associated with flulike illness?: a population-based study from a rural area in Vietnam with outbreaks of highly pathogenic avian influenza	Thorson A	Arch Intern Med	2006	2006/01/13			10.1001/archinte.166.1.119	Arch Intern Med. 2006 Jan 9;166(1):119-23. doi: 10.1001/archinte.166.1.119.
Sweden & Avian	0			15883657	Multiple gene segment reassortment between Eurasian and American lineages of influenza A virus (H6N2) in Guillemot (Uria aalge)	Wallensten A	Arch Virol	2005	2005/05/11			10.1007/s00705-005-0543-8	Arch Virol. 2005 Aug;150(8):1685-92. doi: 10.1007/s00705-005-0543-8. Epub 2005 May 11.
Sweden & Avian	0			26112351	A complete map of potential pathogenicity markers of avian influenza virus subtype H5 predicted from 11 expressed proteins	Khaliq Z	BMC Microbiol	2015	2015/06/27	PMC4482282		10.1186/s12866-015-0465-x	BMC Microbiol. 2015 Jun 26;15:128. doi: 10.1186/s12866-015-0465-x.
Sweden & Avian	0			24726997	The origin of the PB1 segment of swine influenza A virus subtype H1N2 determines viral pathogenicity in mice	Metreveli G	Virus Res	2014	2014/04/15	PMC5533274	NIHMS879360	10.1016/j.virusres.2014.03.023	Virus Res. 2014 Aug 8;188:97-102. doi: 10.1016/j.virusres.2014.03.023. Epub 2014 Apr 13.
Finland & Wildlife	1	1	0	25042528	Molecular epidemiology of H9N2 influenza viruses in Northern Europe	Lindh E	Vet Microbiol	2014	2014/07/22			10.1016/j.vetmic.2014.06.020	Vet Microbiol. 2014 Aug 27;172(3-4):548-54. doi: 10.1016/j.vetmic.2014.06.020. Epub 2014 Jul 2.
Sweden & Avian	0			19863790	The first Swedish H1N2 swine influenza virus isolate represents an uncommon reassortant	Bálint A	Virol J	2009	2009/10/30	PMC2774320		10.1186/1743-422X-6-180	Virol J. 2009 Oct 28;6:180. doi: 10.1186/1743-422X-6-180.
Sweden & Avian	0			27558184	Accurate Detection of Avian Respiratory Viruses by Use of Multiplex PCR-Based Luminex Suspension Microarray Assay	Laamiri N	J Clin Microbiol	2016	2016/08/26	PMC5078549		10.1128/JCM.00610-16	J Clin Microbiol. 2016 Nov;54(11):2716-2725. doi: 10.1128/JCM.00610-16. Epub 2016 Aug 24.
Sweden & Avian	0			18381991	Intervening to reduce inequalities in infections in Europe	Semenza JC	Am J Public Health	2008	2008/04/03	PMC2374832		10.2105/AJPH.2007.120329	Am J Public Health. 2008 May;98(5):787-92. doi: 10.2105/AJPH.2007.120329. Epub 2008 Apr 1.
Sweden & Avian	0			3604824	Avian influenza A virus causing an outbreak of contagious interstitial pneumonia in mink	Englund L	Acta Vet Scand	1986	1986/01/01	PMC8189376		10.1186/BF03548129	Acta Vet Scand. 1986;27(4):497-504. doi: 10.1186/BF03548129.
Sweden & Avian	0			24801053	Efficient chromatographic reduction of ovalbumin for egg-based influenza virus purification	Blom H	Vaccine	2014	2014/05/08			10.1016/j.vaccine.2014.04.033	Vaccine. 2014 Jun 24;32(30):3721-4. doi: 10.1016/j.vaccine.2014.04.033. Epub 2014 May 5.
Sweden & Avian	0			22506709	Biosecurity aspects and pathogen inactivation in acidified high risk animal by-products	Vinnerås B	J Environ Sci Health A Tox Hazard Subst Environ Eng	2012	2012/04/18			10.1080/10934529.2012.668383	J Environ Sci Health A Tox Hazard Subst Environ Eng. 2012;47(8):1166-72. doi: 10.1080/10934529.2012.668383.
Sweden & Avian	0			28567210	Potential disease transmission from wild geese and swans to livestock, poultry and humans: a review of the scientific literature from a One Health perspective	Elmberg J	Infect Ecol Epidemiol	2017	2017/06/02	PMC5443079		10.1080/20008686.2017.1300450	Infect Ecol Epidemiol. 2017 Apr 10;7(1):1300450. doi: 10.1080/20008686.2017.1300450. eCollection 2017.
Sweden & Avian	0			16408705	[Influenza, birds and the threating pandemic. Entire society should plan for an extreme situation, high sick leave included]	Lindberg A	Lakartidningen	2005	2006/01/18				Lakartidningen. 2005 Dec 5-11;102(49):3810-3.
Sweden & Avian	0			33966687	Skewness in the literature on infectious livestock diseases in an emerging economy - the case of Vietnam	Rajala E	Anim Health Res Rev	2021	2021/05/10			10.1017/S1466252321000013	Anim Health Res Rev. 2021 Jun;22(1):1-13. doi: 10.1017/S1466252321000013. Epub 2021 May 10.
Sweden & Avian	0			19877810	Zero prevalence of influenza A virus in two raptor species by standard screening	Gunnarsson G	Vector Borne Zoonotic Dis	2010	2009/11/03			10.1089/vbz.2009.0032	Vector Borne Zoonotic Dis. 2010 May;10(4):387-90. doi: 10.1089/vbz.2009.0032.
Finland & Wildlife	1	1	0	28384060	GENETIC CHARACTERIZATION OF H13 AND H16 INFLUENZA A VIRUSES IN GULLS (LARUS SPP.) WITH CLINICALLY SEVERE DISEASE AND CONCURRENT CIRCOVIRUS INFECTION	Lindh E	J Wildl Dis	2017	2017/04/07			10.7589/2016-09-212	J Wildl Dis. 2017 Jul;53(3):561-571. doi: 10.7589/2016-09-212. Epub 2017 Apr 6.
Sweden & Avian	0			26886224	A Panel of Stably Expressed Reference Genes for Real-Time qPCR Gene Expression Studies of Mallards (Anas platyrhynchos)	Chapman JR	PLoS One	2016	2016/02/18	PMC4757037		10.1371/journal.pone.0149454	PLoS One. 2016 Feb 17;11(2):e0149454. doi: 10.1371/journal.pone.0149454. eCollection 2016.
Sweden & Avian	0			17868564	Highly pathogenic avian influenza A/H5N1 in birds within the EU--implications for public health	Influenza Team European Centre for Disease Prevention and Control, Stockholm, Sweden	Euro Surveill	2007	2007/09/18				Euro Surveill. 2007 Jul 5;12(7):E070705.2.
Sweden & Avian	0			26616038	One versus two doses: What is the best use of vaccine in an influenza pandemic?	Matrajt L	Epidemics	2015	2015/12/01	PMC4664891	NIHMS705118	10.1016/j.epidem.2015.06.001	Epidemics. 2015 Dec;13:17-27. doi: 10.1016/j.epidem.2015.06.001. Epub 2015 Jun 22.
Sweden & Avian	0			22302287	Development of a novel real-time PCR-based strategy for simple and rapid molecular pathotyping of Newcastle disease virus	Yacoub A	Arch Virol	2012	2012/02/04			10.1007/s00705-012-1231-0	Arch Virol. 2012 May;157(5):833-44. doi: 10.1007/s00705-012-1231-0.
Sweden & Avian	0			27321961	Taking forward a 'One Health' approach for turning the tide against the Middle East respiratory syndrome coronavirus and other zoonotic pathogens with epidemic potential	Zumla A	Int J Infect Dis	2016	2016/06/21	PMC7128966		10.1016/j.ijid.2016.06.012	Int J Infect Dis. 2016 Jun;47:5-9. doi: 10.1016/j.ijid.2016.06.012. Epub 2016 Jun 15.
Sweden & Avian	0			23565306	Is it a policy crisis or it is a health crisis? The Egyptian context--analysis of the Egyptian health policy for the H1N1 flu pandemic control	Seef S	Pan Afr Med J	2013	2013/04/09	PMC3617603		10.11604/pamj.2013.14.59.1631	Pan Afr Med J. 2013;14:59. doi: 10.11604/pamj.2013.14.59.1631. Epub 2013 Feb 12.
Sweden & Avian	0			16801708	Human cases of avian influenza in eastern Turkey: the weather factor	Giesecke J	Euro Surveill	2006	2006/06/28			10.2807/esw.11.03.02877-en	Euro Surveill. 2006 Jan 19;11(1):E060119.2. doi: 10.2807/esw.11.03.02877-en.
Sweden & Avian	0			19077274	Phylogenetic analysis of the non-structural (NS) gene of influenza A viruses isolated from mallards in Northern Europe in 2005	Zohari S	Virol J	2008	2008/12/17	PMC2625346		10.1186/1743-422X-5-147	Virol J. 2008 Dec 12;5:147. doi: 10.1186/1743-422X-5-147.
Sweden & Avian	0			29139346	In vivo mallard experiments indicate that zanamivir has less potential for environmental influenza A virus resistance development than oseltamivir	Nykvist M	J Gen Virol	2017	2017/11/16			10.1099/jgv.0.000977	J Gen Virol. 2017 Dec;98(12):2937-2949. doi: 10.1099/jgv.0.000977.
Sweden & Avian	0			28434824	Multiple pathogen biomarker detection using an encoded bead array in droplet PCR	Periyannan Rajeswari PK	J Microbiol Methods	2017	2017/04/25			10.1016/j.mimet.2017.04.007	J Microbiol Methods. 2017 Aug;139:22-28. doi: 10.1016/j.mimet.2017.04.007. Epub 2017 Apr 20.
Russia & Avian	1	0		8722298	Changes of morphological, biological and antigenic properties of avian influenza A virus haemagglutinin H2 in the course of adaptation to new host	Lipatov AS	Acta Virol	1995	1995/12/01				Acta Virol. 1995 Dec;39(5-6):279-81.
Sweden & Avian	0			18726592	Positive diversifying selection in avian Mx genes	Berlin S	Immunogenetics	2008	2008/08/30			10.1007/s00251-008-0324-0	Immunogenetics. 2008 Nov;60(11):689-97. doi: 10.1007/s00251-008-0324-0. Epub 2008 Aug 26.
Sweden & Avian	0			17868585	Low Pathogenicity Avian Influenzas and human health	Influenza team European Centre for Disease Prevention and Control (ECDC)	Euro Surveill	2007	2007/09/18			10.2807/esw.12.22.03209-en	Euro Surveill. 2007 May 31;12(5):E070531.3. doi: 10.2807/esw.12.22.03209-en.
Sweden & Avian	0			16819129	World avian influenza update: H5N1 could become endemic in Africa	Influenza team	Euro Surveill	2006	2006/07/05			10.2807/esw.11.25.02979-en	Euro Surveill. 2006 Jun 22;11(6):E060622.3. doi: 10.2807/esw.11.25.02979-en.
Sweden & Avian	0			11030743	A strain of human influenza A virus binds to extended but not short gangliosides as assayed by thin-layer chromatography overlay	Miller-Podraza H	Glycobiology	2000	2000/10/13			10.1093/glycob/10.10.975	Glycobiology. 2000 Oct;10(10):975-82. doi: 10.1093/glycob/10.10.975.
Sweden & Avian	0			9821874	Epitope dissection of receptor-active gangliosides with affinity for Helicobacter pylori and influenza virus	Miller-Podraza H	Acta Biochim Pol	1998	1998/11/20				Acta Biochim Pol. 1998;45(2):439-49.
Sweden & Avian	0			16804202	No new human infections with A/H5N1 in Turkey but national measures and international support continue	Influenza Team	Euro Surveill	2006	2006/06/29			10.2807/esw.11.05.02890-en	Euro Surveill. 2006 Feb 2;11(2):E060202.2. doi: 10.2807/esw.11.05.02890-en.
Sweden & Marine Mammals	0			30675873	Vitamin D supplementation to prevent acute respiratory infections: individual participant data meta-analysis	Martineau AR	Health Technol Assess	2019	2019/01/25	PMC6369419		10.3310/hta23020	Health Technol Assess. 2019 Jan;23(2):1-44. doi: 10.3310/hta23020.
Sweden & Marine Mammals	0			28855380	The ghost of pandemics past: revisiting two centuries of influenza in Sweden	Holmberg M	Med Humanit	2017	2017/09/01	PMC5629937		10.1136/medhum-2016-011023	Med Humanit. 2017 Sep;43(3):141-147. doi: 10.1136/medhum-2016-011023. Epub 2016 Nov 8.
Sweden & Marine Mammals	0			26658347	Seroprevalence of Antibodies against Seal Influenza A(H10N7) Virus in Harbor Seals and Gray Seals from the Netherlands	Bodewes R	PLoS One	2015	2015/12/15	PMC4684379		10.1371/journal.pone.0144899	PLoS One. 2015 Dec 14;10(12):e0144899. doi: 10.1371/journal.pone.0144899. eCollection 2015.
Sweden & Marine Mammals	0			17513894	Hearing loss in young men: possible aetiological factors	Rosenhall U	Noise Health	2006	2007/05/22			10.4103/1463-1741.32466	Noise Health. 2006 Jan-Mar;8(30):40-4. doi: 10.4103/1463-1741.32466.
Sweden & Marine Mammals	0			32871031	Emerging Influenza D virus infection in European livestock as determined in serology studies: Are we underestimating its spread over the continent?	Gaudino M	Transbound Emerg Dis	2021	2020/09/02			10.1111/tbed.13812	Transbound Emerg Dis. 2021 May;68(3):1125-1135. doi: 10.1111/tbed.13812. Epub 2020 Sep 18.
Sweden & Marine Mammals	0			28301394	Effects on the anti-ABO titers of military blood donors from a predeployment vaccination program	Berséus O	J Trauma Acute Care Surg	2017	2017/03/17			10.1097/TA.0000000000001420	J Trauma Acute Care Surg. 2017 Jun;82(6S Suppl 1):S91-S95. doi: 10.1097/TA.0000000000001420.
[truncated: 1,071 more rows]
